# Supplementary material for: Metabolites Link Intake of a Healthy Diet to Better Insulin and Glucose Homeostasis in the Microbiome and Insulin Longitudinal Evaluation Study (MILES)
Source: Curr Dev Nutr. 2024 Sep 26;8(11):104462. doi: 10.1016/j.cdnut.2024.104462 (PMC11609643; doi:10.1016/j.cdnut.2024.104462)
Supplement: Multimedia component 1 [file mmc1.pdf]

**Stronger Associations with Glucose Homeostasis for Metabolomic Biomarkers of Dietary Intake Compared to Self-Reported Intake in The Microbiome and Insulin Longitudinal Evaluation Study (MILES)**

**Supplementary Methods**

## **Diet Score Components**

Healthy Eating Index – 2015 version (HEI-15) score: Total HEI-15 score was created from 13 dietary components: (1) total fruit [5 points], (2) whole fruit [5 points], (3) total vegetables [5 points], (4) greens and beans [5 points], (5) whole grains [10 points], (6) dairy [10 points], (7) total protein foods [5 points], (8) seafood and plant proteins [5 points], (9) fatty acids [10 points], (10) refined grains [10 points], (11) sodium [10 points], (12) added sugars [10 points], and (13) saturated fats [10 points]. Each component is calculated as a ratio of each 1,000 kcals consumed, and the components summed (26). Total HEI-15 scores range from 0 to 100.

Dietary Approaches to Stop Hypertension (DASH) score: The following 8 components were quintiled, and summed: (1) fruit and fruit juice, (2) vegetables, (3) whole grains, (4) nuts and legumes, (5) low-fat dairy, (6) sodium, (7) red and processed meat, and (8) sugar-sweetened beverages (SSBs) [sodium, red and processed meat, and SSB components were reverse scored].

Alternative Mediterranean Diet (A-MED) score: The following 9 components were cut at the sex-specific median: (1) vegetables (2) legumes, (3) fruit (4) nuts, (5) whole grains, (6) fish, (7) red meat, (8) dairy and (9) saturated to unsaturated fat ratio. Scores for these components were summed, with red meat and dairy scores reversed before aggregation. A score of 1 for men who reported 1-2 alcoholic drinks per day (3.5-17.5 grams of ethanol) on average, and women who reported ~1 alcohol drink per day (3.5-10.5 grams of ethanol) on average was added to the summed component (28; 29).

Supplementary Table 1: Distribution of raw and transformed metabolites, the correlation between raw and transformed metabolite values, and coefficient of variation of raw metabolites

| Metabolite                                | Raw metabolite |                    |       |          |                          | Transformed metabolite |          | Correlation between Raw and Transformed Metabolite Values | Coefficient of Variation |  |
|-------------------------------------------|----------------|--------------------|-------|----------|--------------------------|------------------------|----------|-----------------------------------------------------------|--------------------------|--|
|                                           | Mean           | Standard deviation | Skew  | Kurtosis | Coefficient of Variation | Skew                   | Kurtosis |                                                           | %                        |  |
| carnitine                                 | 1.00           | 0.18               | -0.27 | 0.43     | 17.63                    | 0.00                   | -0.12    | 0.99                                                      | 7.80E-01                 |  |
| 3-phenylpropionate (hydrocinnamate)       | 1.33           | 1.31               | -0.52 | -0.48    | 98.96                    | 0.12                   | -0.36    | 0.89                                                      | 0.00E+00                 |  |
| phenylacetate                             | 1.25           | 0.93               | -0.36 | -0.38    | 74.36                    | 0.18                   | -0.43    | 0.90                                                      | 0.00E+00                 |  |
| hippurate                                 | 1.38           | 1.39               | -0.26 | -0.03    | 100.68                   | 0.00                   | -0.12    | 0.83                                                      | 0.00E+00                 |  |
| xanthurenate                              | 1.08           | 0.52               | -0.63 | 0.90     | 48.11                    | 0.05                   | -0.24    | 0.96                                                      | 1.37E+01                 |  |
| suberate (C8-DC)                          | 1.26           | 0.81               | 0.21  | 0.31     | 64.81                    | 0.19                   | -0.44    | 0.83                                                      | 1.04E+01                 |  |
| 3-methyl-2-oxovalerate                    | 1.05           | 0.34               | -1.89 | 10.14    | 32.09                    | 0.00                   | -0.12    | 0.98                                                      | 0.00E+00                 |  |
| methionine sulfoxide                      | 1.26           | 1.02               | 1.67  | 3.92     | 80.82                    | 0.00                   | -0.12    | 0.73                                                      | 1.20E+01                 |  |
| 3-methylhistidine                         | 1.50           | 1.43               | -0.67 | 0.29     | 95.29                    | 0.00                   | -0.12    | 0.91                                                      | 3.04E+00                 |  |
| 4-acetamidophenylglucuronide              | 59.04          | 177.95             | 2.00  | 3.09     | 301.86                   | 1.42                   | 0.83     | 0.61                                                      | 0.00E+00                 |  |
| 5-hydroxylysine                           | 1.07           | 0.43               | 0.06  | 0.45     | 40.69                    | 0.01                   | -0.15    | 0.94                                                      | 0.00E+00                 |  |
| 4-guanidinobutanoate                      | 1.51           | 1.69               | -0.07 | -0.63    | 112.57                   | 0.30                   | -0.52    | 0.77                                                      | 9.14E+00                 |  |
| pimelate (C7-DC)                          | 1.22           | 0.74               | 0.84  | -0.42    | 61.31                    | 0.89                   | -0.23    | 0.87                                                      | 6.37E+00                 |  |
| glucuronate                               | 1.19           | 0.94               | -0.11 | 3.45     | 79.35                    | 0.00                   | -0.12    | 0.75                                                      | 0.00E+00                 |  |
| glycerol 3-phosphate                      | 1.00           | 0.43               | -1.02 | 0.59     | 43.21                    | 0.08                   | -0.30    | 0.99                                                      | 7.41E+00                 |  |
| imidazole lactate                         | 1.03           | 0.36               | -0.16 | -0.02    | 35.39                    | 0.00                   | -0.12    | 0.98                                                      | 0.00E+00                 |  |
| kynurenine                                | 1.03           | 0.29               | -0.19 | 0.27     | 28.16                    | 0.00                   | -0.12    | 0.99                                                      | 0.00E+00                 |  |
| glycerophosphorylcholine (GPC)            | 1.00           | 0.27               | -0.15 | 0.52     | 26.90                    | 0.00                   | -0.12    | 0.98                                                      | 2.66E+00                 |  |
| N-acetylglutamate                         | 1.07           | 0.38               | -2.36 | 7.04     | 35.39                    | 0.07                   | -0.28    | 0.94                                                      | 0.00E+00                 |  |
| tartarate                                 | 1.47           | 2.23               | -0.33 | -0.53    | 152.27                   | 0.31                   | -0.52    | 0.62                                                      | 1.32E+01                 |  |
| xanthosine                                | 1.08           | 0.45               | 0.37  | 3.78     | 41.40                    | 0.02                   | -0.18    | 0.80                                                      | 0.00E+00                 |  |
| ribitol                                   | 1.05           | 0.32               | 0.31  | 1.25     | 30.17                    | 0.02                   | -0.16    | 0.92                                                      | 0.00E+00                 |  |
| 2-isopropylmalate                         | 2.19           | 6.16               | 0.78  | 2.28     | 281.16                   | 0.12                   | -0.36    | 0.46                                                      | 0.00E+00                 |  |
| glycodeloxycholate                        | 1.73           | 2.18               | -0.13 | 0.11     | 126.32                   | 0.08                   | -0.30    | 0.77                                                      | 1.46E+01                 |  |
| theophylline                              | 1.14           | 0.99               | -1.26 | 1.12     | 87.16                    | 0.08                   | -0.30    | 0.92                                                      | 0.00E+00                 |  |
| quinat                                    | 1.55           | 2.10               | -0.48 | -0.85    | 135.62                   | 0.07                   | -0.28    | 0.84                                                      | 1.83E+00                 |  |
| theobromine                               | 1.59           | 1.87               | -0.98 | -0.10    | 117.80                   | 0.23                   | -0.48    | 0.85                                                      | 5.88E+00                 |  |
| gentisate                                 | 1.31           | 1.26               | -0.35 | -0.39    | 95.74                    | 0.26                   | -0.50    | 0.82                                                      | 0.00E+00                 |  |
| paraxanthine                              | 1.22           | 1.05               | -0.86 | -0.18    | 85.71                    | 0.17                   | -0.42    | 0.93                                                      | 0.00E+00                 |  |
| indolelactate                             | 1.07           | 0.43               | 0.15  | 0.81     | 40.66                    | 0.00                   | -0.12    | 0.93                                                      | 0.00E+00                 |  |
| 3-indoxyl sulfate                         | 1.11           | 0.57               | -0.60 | 0.69     | 51.56                    | 0.00                   | -0.12    | 0.97                                                      | 0.00E+00                 |  |
| gamma-glutamylphenylalanine               | 1.19           | 0.60               | 1.69  | 3.30     | 50.64                    | 0.00                   | -0.12    | 0.79                                                      | 0.00E+00                 |  |
| 4-methyl-2-oxopentanoate                  | 1.02           | 0.33               | -2.73 | 15.33    | 32.01                    | 0.00                   | -0.12    | 0.99                                                      | 0.00E+00                 |  |
| 1,5-anhydroglucitol (1,5-AG)              | 1.01           | 0.31               | -0.75 | 0.65     | 30.98                    | 0.00                   | -0.12    | 1.00                                                      | 8.34E-07                 |  |
| 2-arachidonoylglycerol (20:4)             | 1.40           | 1.45               | 0.15  | -1.17    | 103.72                   | 0.58                   | -0.51    | 0.75 NA                                                   | 0.00E+00                 |  |
| 1-palmitoyl-GPC (16:0)                    | 1.10           | 0.56               | 0.68  | 1.42     | 50.98                    | 0.00                   | -0.12    | 0.86                                                      | 0.00E+00                 |  |
| 1-stearoyl-2-arachidonoyl-GPI (18:0/20:4) | 1.02           | 0.23               | -0.35 | -0.11    | 23.15                    | 0.00                   | -0.12    | 1.00                                                      | 9.36E-01                 |  |
| sphingosine 1-phosphate                   | 1.07           | 0.20               | 0.54  | 0.21     | 18.80                    | 0.00                   | -0.12    | 0.97                                                      | 9.88E-01                 |  |
| 1-stearoyl-2-oleoyl-GPS (18:0/18:1)       | 1.41           | 1.19               | -0.04 | -0.07    | 84.33                    | 0.00                   | -0.12    | 0.88                                                      | 4.60E+00                 |  |
| 1-stearoyl-GPI (18:0)                     | 1.14           | 0.51               | 0.35  | 1.06     | 44.84                    | 0.00                   | -0.12    | 0.91                                                      | 0.00E+00                 |  |
| 1,2-dipalmitoyl-GPC (16:0/16:0)           | 1.01           | 0.17               | -0.01 | 0.86     | 17.02                    | 0.00                   | -0.12    | 0.98                                                      | 0.00E+00                 |  |
| docosahexaenoate (DHA; 22:6n3)            | 1.35           | 1.02               | 0.22  | 0.50     | 75.47                    | 0.00                   | -0.12    | 0.85                                                      | 0.00E+00                 |  |
| 1-myristoyl-2-palmitoyl-GPC (14:0/16:0)   | 1.16           | 0.71               | -0.18 | 0.07     | 61.37                    | 0.00                   | -0.12    | 0.94                                                      | 0.00E+00                 |  |
| alpha-hydroxyisocaproate                  | 1.06           | 0.41               | -0.32 | 0.72     | 38.18                    | 0.01                   | -0.13    | 0.97                                                      | 0.00E+00                 |  |
| maleate                                   | 1.25           | 1.03               | 1.92  | 5.23     | 82.51                    | 0.00                   | -0.12    | 0.69                                                      | 7.66E+00                 |  |
| isovalerate (5:0)                         | 2.10           | 3.93               | 0.86  | 1.64     | 187.27                   | 0.33                   | -0.53    | 0.62                                                      | 3.75E+01                 |  |
| 4-acetylphenol sulfate                    | 2.38           | 12.68              | 0.78  | 2.96     | 533.89                   | 0.12                   | -0.36    | 0.30                                                      | 0.00E+00                 |  |
| 2-hydroxyoctanoate                        | 1.19           | 0.81               | 0.78  | 1.80     | 68.19                    | 0.00                   | -0.12    | 0.80                                                      | 4.94E+00                 |  |
| 3-hydroxyoctanoate                        | 1.13           | 0.51               | -0.03 | 0.02     | 45.38                    | 0.00                   | -0.12    | 0.96                                                      | 9.71E-01                 |  |
| phenyllactate (PLA)                       | 1.08           | 0.42               | 0.17  | 0.26     | 39.42                    | 0.00                   | -0.12    | 0.95                                                      | 0.00E+00                 |  |
| palmitoylcarnitine (C16)                  | 1.02           | 0.27               | -0.20 | 0.07     | 26.79                    | 0.00                   | -0.12    | 0.99                                                      | 0.00E+00                 |  |
| hexanoylcarnitine (C6)                    | 1.22           | 1.04               | 0.73  | 2.52     | 85.53                    | 0.01                   | -0.13    | 0.73                                                      | 0.00E+00                 |  |
| theanine                                  | 0.81           | 0.48               | 13.03 | 168.76   | 59.05                    | 13.03                  | 168.78   | 0.94                                                      | 4.80E+01                 |  |
| N-acetylaspartate (NAA)                   | 0.96           | 0.23               | -1.16 | 2.43     | 24.16                    | 0.00                   | -0.12    | 1.00                                                      | 5.51E+00                 |  |
| dehydroepiandrosterone sulfate (DHEA-S)   | 1.23           | 0.86               | -0.33 | 0.33     | 70.16                    | 0.00                   | -0.12    | 0.92                                                      | 3.20E-07                 |  |
| acetylcarnitine (C2)                      | 1.07           | 0.36               | -0.20 | -0.23    | 33.68                    | 0.00                   | -0.12    | 0.98                                                      | 7.72E-01                 |  |
| cysteine s-sulfate                        | 1.08           | 0.56               | -0.41 | -0.30    | 52.04                    | 0.01                   | -0.15    | 0.97                                                      | 1.04E+01                 |  |
| 1-palmitoylglycerol (16:0)                | 1.09           | 0.49               | -0.24 | 0.86     | 45.21                    | 0.04                   | -0.21    | 0.92                                                      | 0.00E+00                 |  |
| tartronate (hydroxymalonate)              | 1.00           | 0.51               | -1.69 | 3.49     | 51.05                    | 0.00                   | -0.12    | 0.99                                                      | 0.00E+00                 |  |
| oxalate (ethanedioate)                    | 0.95           | 0.40               | -1.10 | 0.99     | 41.71                    | 0.00                   | -0.12    | 0.99                                                      | 0.00E+00                 |  |
| erythritol                                | 4.09           | 22.19              | 3.63  | 15.29    | 543.24                   | 0.00                   | -0.12    | 0.35                                                      | 0.00E+00                 |  |
| saccharin                                 | 3.41           | 11.98              | 0.41  | -0.36    | 352.05                   | 0.37                   | -0.54    | 0.46                                                      | 0.00E+00                 |  |
| 3-hydroxymyristate                        | 1.30           | 0.81               | -0.40 | -0.06    | 62.72                    | 0.01                   | -0.15    | 0.95                                                      | 8.75E-08                 |  |
| iminodiacetate (IDA)                      | 0.96           | 0.37               | 0.04  | -0.95    | 38.51                    | 0.00                   | -0.12    | 0.97                                                      | 1.46E+00                 |  |
| 1-oleoylglycerol (18:1)                   | 1.04           | 0.62               | 0.13  | 0.23     | 59.57                    | 0.00                   | -0.12    | 0.91                                                      | 0.00E+00                 |  |
| 3-methyl-2-oxobutrate                     | 1.00           | 0.29               | -3.33 | 15.43    | 29.38                    | 0.01                   | -0.13    | 0.98                                                      | 0.00E+00                 |  |
| 1,6-anhydroglucose                        | 2.04           | 3.90               | 0.38  | -0.56    | 191.34                   | 0.44                   | -0.55    | 0.63                                                      | 1.10E+01                 |  |
| 2-oleoylglycerol (18:1)                   | 1.07           | 0.59               | 0.41  | -1.55    | 55.01                    | 0.87                   | -0.25    | 0.94                                                      | 3.38E-02                 |  |
| homocarnitine                             | 1.14           | 0.51               | 0.06  | -0.21    | 44.37                    | 0.00                   | -0.12    | 0.95                                                      | 0.00E+00                 |  |
| homocitrulline                            | 1.19           | 0.71               | 0.30  | -0.08    | 60.33                    | 0.00                   | -0.12    | 0.91                                                      | 1.74E+01                 |  |
| pyroglutamylglutamine                     | 1.02           | 0.33               | -0.27 | 0.96     | 32.57                    | 0.01                   | -0.15    | 0.97                                                      | 2.33E+01                 |  |
| bradykinin                                | 1.96           | 2.09               | 2.14  | 3.17     | 106.64                   | 1.90                   | 2.38     | 0.91                                                      | 0.00E+00                 |  |
| glycylproline                             | 8.78           | 22.67              | 1.60  | 1.44     | 258.70                   | 1.27                   | 0.48     | 0.63 NA                                                   | 0.00E+00                 |  |
| 2-linoleoylglycerol (18:2)                | 1.09           | 0.52               | -1.16 | 0.60     | 48.19                    | 0.20                   | -0.45    | 0.96                                                      | 2.11E+01                 |  |
| 3-hydroxydecanoate                        | 1.20           | 0.60               | -0.07 | -0.35    | 50.44                    | 0.00                   | -0.12    | 0.95                                                      | 1.10E-06                 |  |
| citramalate                               | 1.49           | 1.48               | -0.04 | 0.48     | 99.79                    | 0.11                   | -0.35    | 0.77                                                      | 0.00E+00                 |  |
| EDTA                                      | 0.99           | 0.15               | 0.01  | 0.89     | 14.82                    | 0.00                   | -0.12    | 0.99                                                      | 1.95E+00                 |  |
| N-acetyllysine                            | 1.27           | 0.95               | 0.63  | 0.43     | 74.31                    | 0.00                   | -0.12    | 0.84                                                      | 2.16E+00                 |  |
| ribonate                                  | 1.04           | 0.44               | 0.45  | 4.38     | 42.57                    | 0.00                   | -0.12    | 0.78                                                      | 0.00E+00                 |  |
| threonate                                 | 1.08           | 0.43               | -0.86 | 1.01     | 39.78                    | 0.00                   | -0.12    | 0.99                                                      | 4.44E+00                 |  |
| galactonate                               | 1.29           | 1.12               | -0.62 | -0.41    | 86.46                    | 0.22                   | -0.47    | 0.89                                                      | 0.00E+00                 |  |
| beta-sitosterol                           | 1.11           | 0.64               | -0.73 | -0.04    | 57.36                    | 0.18                   | -0.43    | 0.94 NA                                                   | 0.00E+00                 |  |
| indoleacetate                             | 1.20           | 0.84               | 0.52  | 0.81     | 69.59                    | 0.00                   | -0.12    | 0.84                                                      | 0.00E+00                 |  |
| 1-linoleoylglycerol (18:2)                | 1.03           | 0.48               | 0.09  | 0.11     | 46.30                    | 0.00                   | -0.12    | 0.93                                                      | 3.52E+00                 |  |
| 1-methylhistidine                         | 1.08           | 0.41               | 0.01  | 0.20     | 37.59                    | 0.01                   | -0.13    | 0.96                                                      | 1.38E+01                 |  |
| butyrylcarnitine (C4)                     | 1.24           | 1.45               | -0.50 | 5.43     | 116.63                   | 0.01                   | -0.15    | 0.59                                                      | 0.00E+00                 |  |
| isobutyrylcarnitine (C4)                  | 1.15           | 0.73               | 0.02  | 0.25     | 63.40                    | 0.00                   | -0.12    | 0.90                                                      | 1.47E+00                 |  |
| glycolithocholate                         | 1.73           | 2.11               | 0.25  | -0.81    | 122.00                   | 0.38                   | -0.54    | 0.80                                                      | 0.00E+00                 |  |
| androsterone sulfate                      | 1.25           | 1.03               | -0.81 | 2.01     | 82.31                    | 0.00                   | -0.12    | 0.92                                                      | 3.98E+00                 |  |
| indolepropionate                          | 1.40           | 1.34               | -1.21 | 6.32     | 96.33                    | 0.01                   | -0.15    | 0.86                                                      | 0.00E+00                 |  |
| N-(2-furoyl)glycine                       | 2.88           | 7.81               | 0.70  | 1.57     | 271.47                   | 0.23                   | -0.47    | 0.55                                                      | 0.00E+00                 |  |
| trigonelline (N'-methylnicotinate)        | 1.59           | 1.99               | -0.42 | 0.26     | 125.31                   | 0.00                   | -0.12    | 0.83                                                      | 0.00E+00                 |  |
| dodecanedioate (C12-DC)                   | 1.39           | 1.46               | 0.67  | 1.04     | 104.73                   | 0.00                   | -0.12    | 0.75                                                      | 0.00E+00                 |  |
| N-acetyltyrosine                          | 1.09           | 0.54               | 0.65  | 1.40     | 49.31                    | 0.00                   | -0.12    | 0.86                                                      | 1.00E+00                 |  |
| 1,3-dimethylurate                         | 1.16           | 0.92               | -0.41 | -1.07    | 79.11                    | 0.34                   | -0.53    | 0.91                                                      | 6.30E+00                 |  |
| 3-methylxanthine                          | 1.41           | 1.54               | -0.68 | 0.24     | 109.33                   | 0.11                   | -0.34    | 0.81                                                      | 3.80E+00                 |  |
| 3-hydroxylaurate                          | 1.27           | 0.77               | -0.58 | 0.04     | 61.21                    | 0.00                   | -0.12    | 0.96                                                      | 0.00E+00                 |  |
| pyridoxate                                | 2.14           | 4.27               | 1.17  | 1.39     | 200.01                   | 0.00                   | -0.12    | 0.59                                                      | 0.00E+00                 |  |
| gamma-glutamylvaline                      | 1.56           | 1.71               | 1.56  | 3.19     | 110.08                   | 0.00                   | -0.12    | 0.70                                                      | 0.00E+00                 |  |
| pyroglutamylglycine                       | 1.87           | 2.06               | 0.37  | -0.47    | 110.35                   | 0.01                   | -0.13    | 0.83                                                      | 0.00E+00                 |  |
| pyroglutamylvaline                        | 1.17           | 0.51               | -0.48 | 0.75     | 43.51                    | 0.05                   | -0.24    | 0.94                                                      | 7.13E+00                 |  |
| 3-hydroxysebacate                         | 1.33           | 1.28               | -0.17 | 0.53     | 96.62                    | 0.10                   | -0.33    | 0.78                                                      | 5.85E+00                 |  |
| 5-hydroxyhexanoate                        | 1.18           | 0.59               | 0.16  | -1.47    | 50.32                    | 0.65                   | -0.46    | 0.95                                                      | 0.00E+00                 |  |
| propionylglycine                          | 1.20           | 0.74               | -0.85 | 0.32     | 61.67                    | 0.19                   | -0.44    | 0.91                                                      | 2.89E+01                 |  |

Supplementary Table 1: Distribution of raw and transformed metabolites, the correlation between raw and transformed metabolite values, and coefficient of variation of raw metabolites

|                                                      |       |        |       |       |        |      |       |      |          |
|------------------------------------------------------|-------|--------|-------|-------|--------|------|-------|------|----------|
| butyrylglycine                                       | 1.21  | 0.65   | -0.01 | -0.72 | 54.25  | 0.36 | -0.54 | 0.89 |          |
| 2-methylbutyrylglycine                               | 1.16  | 0.70   | 0.91  | -0.14 | 60.65  | 0.88 | -0.24 | 0.85 |          |
| propionylcarnitine (C3)                              | 1.09  | 0.40   | 0.06  | 0.03  | 36.74  | 0.00 | -0.12 | 0.96 | 0.00E+00 |
| pro-hydroxy-pro                                      | 1.08  | 0.44   | -0.53 | 0.86  | 40.60  | 0.05 | -0.25 | 0.96 | 0.00E+00 |
| 3-hydroxy-2-ethylpropionate                          | 1.07  | 0.40   | -0.03 | 0.41  | 37.58  | 0.00 | -0.12 | 0.96 | 0.00E+00 |
| 3-carboxy-4-methyl-5-propyl-2-furanpropanoate (CMPF) | 2.10  | 3.22   | -0.22 | 0.24  | 153.80 | 0.00 | -0.12 | 0.77 | 0.00E+00 |
| docosapentaenoate (n3 DPA; 22:5n3)                   | 1.43  | 1.11   | 0.11  | -0.06 | 77.65  | 0.00 | -0.12 | 0.86 | 0.00E+00 |
| docosadienoate (22:2n6)                              | 1.19  | 0.63   | -0.10 | 0.22  | 53.25  | 0.00 | -0.12 | 0.92 | 0.00E+00 |
| adrenate (22:4n6)                                    | 1.16  | 0.54   | -0.17 | 0.35  | 46.74  | 0.00 | -0.12 | 0.95 | 0.00E+00 |
| 10-undecenoate (11:1n1)                              | 1.09  | 0.51   | -0.45 | 1.10  | 47.14  | 0.00 | -0.12 | 0.95 | 0.00E+00 |
| 4-imidazoleacetate                                   | 1.05  | 0.43   | -0.94 | -0.40 | 40.81  | 0.28 | -0.51 | 0.99 | 3.17E+01 |
| 1-methyl-4-imidazoleacetate                          | 1.04  | 0.35   | -1.69 | 4.74  | 33.91  | 0.05 | -0.24 | 0.97 | 0.00E+00 |
| sebacate (C10-DG)                                    | 1.31  | 1.07   | 0.84  | 2.25  | 81.61  | 0.02 | -0.16 | 0.75 | 2.74E+01 |
| guanidininosuccinate                                 | 1.54  | 1.48   | -0.18 | -0.93 | 96.50  | 0.03 | -0.20 | 0.91 | 6.13E+01 |
| delta-tocopherol                                     | 1.36  | 1.04   | -0.60 | -0.10 | 76.59  | 0.12 | -0.36 | 0.93 | NA       |
| l-urobilinogen                                       | 2.06  | 4.54   | 2.48  | 6.61  | 221.36 | 1.63 | 1.44  | 0.54 | 0.00E+00 |
| stearidonate (18:4n3)                                | 1.43  | 1.07   | -0.13 | -0.11 | 74.92  | 0.00 | -0.12 | 0.91 | 0.00E+00 |
| 5-dodecenoate (12:1n7)                               | 1.42  | 1.18   | -0.14 | 1.33  | 83.46  | 0.00 | -0.12 | 0.86 | 2.30E+00 |
| octanoylcarnitine (C8)                               | 1.30  | 1.23   | 0.71  | 1.68  | 95.16  | 0.00 | -0.12 | 0.74 | 0.00E+00 |
| tauro-beta-muricholate                               | 2.37  | 7.54   | 0.83  | 0.26  | 318.11 | 0.59 | -0.50 | 0.44 | 0.00E+00 |
| decanoylcarnitine (C10)                              | 1.28  | 1.11   | 0.56  | 1.28  | 86.74  | 0.00 | -0.12 | 0.78 | 0.00E+00 |
| N-acetylglutamine                                    | 1.11  | 0.50   | 0.46  | 0.89  | 45.33  | 0.00 | -0.12 | 0.89 | 0.00E+00 |
| N-acetyltryptophan                                   | 1.08  | 0.47   | 0.79  | 2.11  | 43.87  | 0.00 | -0.12 | 0.85 | 0.00E+00 |
| N-acetylphenylalanine                                | 1.17  | 0.58   | 0.69  | 1.13  | 49.39  | 0.00 | -0.12 | 0.87 | 0.00E+00 |
| 1-palmitoyl-GPC (16:0)                               | 0.97  | 0.17   | -0.27 | 0.02  | 17.55  | 0.00 | -0.12 | 1.00 | 9.75E-02 |
| 1-margaroyl-GPC (17:0)                               | 1.01  | 0.37   | -0.32 | 0.47  | 36.85  | 0.01 | -0.13 | 0.98 | 0.00E+00 |
| N-acetylgarginine                                    | 1.11  | 0.50   | 0.26  | 0.39  | 45.62  | 0.00 | -0.12 | 0.92 | 0.00E+00 |
| piperine                                             | 1.60  | 1.70   | -0.62 | 0.23  | 106.70 | 0.00 | -0.12 | 0.88 | 0.00E+00 |
| campesterol                                          | 1.15  | 0.66   | -0.35 | 0.35  | 57.44  | 0.04 | -0.21 | 0.93 | NA       |
| myristoylcarnitine (C14)                             | 1.13  | 0.79   | -1.54 | 9.17  | 70.35  | 0.02 | -0.16 | 0.80 | 0.00E+00 |
| 1-stearoyl-GPC (18:0)                                | 0.97  | 0.22   | -0.63 | 0.80  | 23.09  | 0.00 | -0.12 | 1.00 | 1.92E+00 |
| 1-oleoyl-GPC (18:1)                                  | 1.00  | 0.29   | -0.35 | 0.77  | 28.83  | 0.00 | -0.12 | 0.99 | 0.00E+00 |
| N-acetylthreonine                                    | 1.02  | 0.25   | 0.35  | 1.18  | 24.86  | 0.00 | -0.12 | 0.95 | 0.00E+00 |
| N-acetylisoleucine                                   | 1.05  | 0.34   | 0.17  | 0.90  | 32.18  | 0.00 | -0.12 | 0.94 | 4.74E+00 |
| 10-nonadecenoate (19:1n9)                            | 1.28  | 0.80   | -0.30 | 0.00  | 62.93  | 0.00 | -0.12 | 0.94 | 0.00E+00 |
| 10-heptadecenoate (17:1n7)                           | 1.33  | 0.93   | -0.32 | -0.08 | 70.15  | 0.00 | -0.12 | 0.93 | 2.55E-07 |
| hyocholate                                           | 1.41  | 1.23   | -0.13 | -0.08 | 87.62  | 0.19 | -0.44 | 0.84 | 4.00E+01 |
| HWESASLLR                                            | 3.64  | 7.25   | 1.35  | 0.60  | 199.42 | 1.15 | 0.21  | 0.68 | 3.75E+01 |
| epiandrosterone sulfate                              | 1.28  | 1.06   | -0.55 | 0.45  | 83.05  | 0.00 | -0.12 | 0.89 | 0.00E+00 |
| bradykinin, des-arg(9)                               | 1.27  | 1.50   | 2.26  | 3.46  | 118.12 | 2.20 | 3.59  | 0.82 | 2.45E+01 |
| N-acetylhistidine                                    | 1.07  | 0.73   | 0.68  | 6.87  | 68.47  | 0.00 | -0.12 | 0.61 | 0.00E+00 |
| gamma-glutamylglycine                                | 1.32  | 0.78   | 0.62  | 0.50  | 58.78  | 0.00 | -0.12 | 0.88 | 1.03E+01 |
| gamma-glutamyltryptophan                             | 1.05  | 0.28   | 0.16  | 0.44  | 27.00  | 0.00 | -0.12 | 0.96 | 0.00E+00 |
| stachydrine                                          | 1.93  | 2.43   | -0.15 | -0.72 | 126.04 | 0.00 | -0.12 | 0.84 | 1.39E+01 |
| alpha-hydroxyisovalerate                             | 1.39  | 1.58   | 1.31  | 3.07  | 113.62 | 0.00 | -0.12 | 0.68 | 0.00E+00 |
| hydroxybupropion                                     | 1.00  | 0.91   | 5.53  | 29.17 | 91.11  | 5.23 | 26.16 | 0.96 | 1.25E+02 |
| gamma-glutamylmethionine                             | 1.13  | 0.40   | -0.04 | 0.61  | 35.60  | 0.00 | -0.12 | 0.96 | 5.40E+00 |
| gamma-glutamylthreonine                              | 1.32  | 1.04   | -0.85 | 2.55  | 78.84  | 0.11 | -0.34 | 0.77 | 0.00E+00 |
| p-cresol sulfate                                     | 1.12  | 0.67   | -1.64 | 4.78  | 59.71  | 0.00 | -0.12 | 0.97 | 0.00E+00 |
| erythronate*                                         | 1.07  | 0.28   | 0.57  | 1.53  | 25.88  | 0.00 | -0.12 | 0.93 | 2.45E+00 |
| Fibrinopeptide A*                                    | 9.24  | 36.70  | 2.01  | 2.67  | 397.85 | 1.71 | 1.69  | 0.48 | 4.13E+01 |
| Fibrinopeptide A, des-ala(1)*                        | 5.87  | 13.31  | 1.80  | 1.83  | 227.24 | 1.58 | 1.30  | 0.67 | 4.15E+01 |
| Fibrinopeptide A, phosphono-ser(3)*                  | 4.19  | 7.45   | 2.14  | 3.16  | 178.31 | 1.99 | 2.70  | 0.76 | 4.54E+01 |
| XHWESASXXR*                                          | 2.32  | 2.77   | 2.19  | 3.46  | 119.66 | 1.79 |       | 0.88 | NA       |
| HWESASXXX*                                           | 3.59  | 6.05   | 0.54  | -0.36 | 168.58 | 0.24 | -0.48 | 0.74 | 4.98E+01 |
| HXGXA*                                               | 1.65  | 1.84   | 2.57  | 5.07  | 111.72 | 2.59 | 5.41  | 0.85 | 0.00E+00 |
| salicylic glucuronide*                               | 13.31 | 39.97  | 1.06  | 1.03  | 300.76 | 0.24 | -0.48 | 0.60 | 0.00E+00 |
| eicosenoate (20:1)                                   | 1.34  | 0.87   | -0.22 | -0.16 | 65.01  | 0.00 | -0.12 | 0.93 | 0.00E+00 |
| linolenate [alpha or gamma; (18:3n3 or 6)]           | 1.35  | 1.00   | -0.23 | 0.03  | 74.71  | 0.00 | -0.12 | 0.90 | 0.00E+00 |
| aconitate [cis or trans]                             | 1.03  | 0.23   | -0.40 | 2.71  | 22.34  | 0.00 | -0.12 | 0.98 | 0.00E+00 |
| 1-myristoyl-GPC (14:0)                               | 1.04  | 0.46   | -0.12 | 0.00  | 44.04  | 0.00 | -0.12 | 0.96 | 0.00E+00 |
| 1-arachidoyl-GPC (20:0)                              | 1.03  | 0.44   | -0.40 | 0.07  | 42.99  | 0.08 | -0.29 | 0.97 | 1.23E+00 |
| metoprolol acid metabolite*                          | 59.77 | 150.28 | 5.44  | 31.37 | 251.80 | 4.82 | 22.02 | 0.66 | 7.95E+01 |
| heme                                                 | 4.00  | 14.34  | 0.38  | 2.09  | 358.99 | 0.04 | -0.23 | 0.47 | 9.90E-06 |
| stearoylcarnitine (C18)                              | 1.02  | 0.32   | -0.16 | -0.43 | 31.37  | 0.00 | -0.12 | 0.99 | 0.00E+00 |
| laurylcarnitine (C12)                                | 1.19  | 0.93   | 0.53  | 1.74  | 78.50  | 0.00 | -0.12 | 0.77 | 0.00E+00 |
| isovalerylcarnitine (C5)                             | 1.17  | 0.54   | -0.32 | 0.22  | 46.35  | 0.01 | -0.15 | 0.97 | 2.37E+00 |
| 1-linoleoyl-GPC (18:2)                               | 1.01  | 0.30   | -0.39 | 1.12  | 29.57  | 0.00 | -0.12 | 0.98 | 8.42E-01 |
| 7-methylxanthine                                     | 1.34  | 1.27   | -0.26 | -0.79 | 95.05  | 0.26 | -0.50 | 0.85 | 1.19E+01 |
| 1,3,7-trimethylurate                                 | 1.60  | 2.12   | -0.11 | -0.71 | 132.51 | 0.24 | -0.48 | 0.77 | 8.98E-06 |
| 3,7-dimethylurate                                    | 1.50  | 1.34   | -0.19 | -0.87 | 89.56  | 0.32 | -0.53 | 0.87 | 7.89E+00 |
| 1,7-dimethylurate                                    | 1.16  | 0.99   | -1.29 | 1.10  | 85.33  | 0.09 | -0.32 | 0.93 | 0.00E+00 |
| 1-methylurate                                        | 1.14  | 0.98   | -0.66 | -0.23 | 86.25  | 0.03 | -0.20 | 0.92 | 7.43E+00 |
| 5-acetylamino-6-formylamino-3-methyluracil           | 1.53  | 1.65   | -0.41 | -0.57 | 108.15 | 0.23 | -0.47 | 0.85 | 2.12E+01 |
| 5-acetylamino-6-amino-3-methyluracil                 | 1.24  | 1.08   | -1.15 | 0.78  | 87.50  | 0.09 | -0.32 | 0.93 | 0.00E+00 |
| indolebutyrate                                       | 1.24  | 1.03   | 0.32  | -0.38 | 83.16  | 0.34 | -0.53 | 0.81 | 1.65E+01 |
| 1-methylxanthine                                     | 1.25  | 1.09   | -0.80 | -0.40 | 87.53  | 0.26 | -0.50 | 0.89 | 0.00E+00 |
| N1-methylinosine                                     | 1.11  | 0.44   | -0.07 | -0.20 | 39.39  | 0.03 | -0.19 | 0.97 | 4.10E+00 |
| N2,N2-dimethylguanosine                              | 1.04  | 0.25   | 0.06  | 0.55  | 23.95  | 0.01 | -0.15 | 0.97 | 0.00E+00 |
| N4-acetylcytidine                                    | 1.05  | 0.41   | -0.38 | 0.76  | 38.79  | 0.01 | -0.13 | 0.97 | 0.00E+00 |
| N6-carbamoylthreonyladenosine                        | 1.04  | 0.24   | 0.44  | 0.38  | 23.15  | 0.00 | -0.12 | 0.96 | 1.91E-08 |
| orotidine                                            | 1.31  | 3.14   | 2.16  | 16.27 | 239.54 | 0.03 | -0.19 | 0.32 | 0.00E+00 |
| phenylacetylglutamine                                | 1.13  | 0.62   | -0.91 | 1.53  | 54.68  | 0.00 | -0.12 | 0.97 | 2.79E+00 |
| 4-hydroxyhippurate                                   | 1.65  | 1.83   | 0.67  | 0.25  | 111.10 | 0.00 | -0.12 | 0.79 | 0.00E+00 |
| 5,6-dihydrouridine                                   | 1.01  | 0.22   | 0.14  | 1.32  | 21.34  | 0.00 | -0.12 | 0.96 | 0.00E+00 |
| 3-(3-amino-3-carboxypropyl)uridine*                  | 1.02  | 0.24   | -0.16 | 1.26  | 23.84  | 0.01 | -0.13 | 0.97 | 0.00E+00 |
| 1-arachidonylglycerol (20:4)                         | 1.24  | 0.86   | -0.75 | 1.45  | 69.49  | 0.08 | -0.30 | 0.89 | 9.12E+00 |
| 1-linolenoylglycerol (18:3)                          | 1.14  | 0.61   | 0.07  | -1.29 | 54.06  | 0.55 | -0.52 | 0.91 | 0.00E+00 |
| cysteine-glutathione disulfide                       | 1.47  | 2.17   | 0.50  | -0.77 | 147.34 | 0.75 | -0.39 | 0.63 | 1.13E+01 |
| 5-methyluridine (ribothymidine)                      | 0.99  | 0.18   | -0.76 | 1.46  | 18.03  | 0.00 | -0.12 | 0.99 | 0.00E+00 |
| isovalerylglycine                                    | 1.22  | 0.84   | -0.64 | 1.17  | 68.70  | 0.10 | -0.32 | 0.87 | 2.63E+01 |
| 3-hydroxydodecanedioate*                             | 1.48  | 1.77   | 0.16  | 0.25  | 119.94 | 0.14 | -0.39 | 0.71 | 2.66E-06 |
| 7-methylguanine                                      | 1.05  | 0.27   | 0.40  | 1.56  | 25.46  | 0.00 | -0.12 | 0.94 | 0.00E+00 |
| 1-stearoyl-GPE (18:0)                                | 1.00  | 0.28   | -0.04 | -0.37 | 28.23  | 0.00 | -0.12 | 0.98 | 0.00E+00 |
| 1-stearoyl-GPG (18:0)                                | 1.02  | 0.43   | -0.58 | -0.18 | 42.37  | 0.19 | -0.44 | 0.96 | 1.78E+00 |
| N1-Methyl-2-pyridone-5-carboxamide                   | 1.22  | 1.31   | 0.81  | 2.84  | 107.71 | 0.00 | -0.12 | 0.65 | 0.00E+00 |
| mead acid (20:3n9)                                   | 1.29  | 0.88   | -0.77 | 1.23  | 68.65  | 0.08 | -0.30 | 0.89 | NA       |
| gamma-glutamylisoleucine*                            | 1.59  | 1.70   | 1.79  | 3.54  | 107.35 | 0.00 | -0.12 | 0.70 | 0.00E+00 |
| oleoylcarnitine (C18:1)                              | 1.04  | 0.31   | -0.19 | -0.06 | 29.63  | 0.00 | -0.12 | 0.99 | 1.41E+00 |
| 2-methylbutyrylcarnitine (C5)                        | 1.10  | 0.53   | -0.34 | 0.54  | 48.27  | 0.05 | -0.24 | 0.94 | 1.59E+01 |
| phenol sulfate                                       | 1.43  | 1.26   | 0.60  | -0.01 | 88.16  | 0.00 | -0.12 | 0.85 | 0.00E+00 |
| 1-palmitoleoyl-GPC (16:1)*                           | 1.02  | 0.41   | 0.17  | 0.38  | 40.22  | 0.00 | -0.12 | 0.94 | 0.00E+00 |
| hexanoylglycine                                      | 1.29  | 1.02   | -0.23 | -1.02 | 79.26  | 0.42 | -0.55 | 0.82 | 1.72E+01 |
| glutamine_degradant*                                 | 1.28  | 0.93   | 0.18  | -0.36 | 72.79  | 0.00 | -0.12 | 0.90 | 0.00E+00 |
| 2-hydroxy-3-methylvalerate                           | 1.32  | 1.25   | 0.82  | 1.75  | 94.90  | 0.00 | -0.12 | 0.75 | 0.00E+00 |
| homostachydrine*                                     | 1.30  | 1.27   | -0.18 | 1.03  | 97.25  | 0.03 | -0.20 | 0.77 | 0.00E+00 |
| 1-arachidonoyl-GPC (20:4n6)*                         | 1.02  | 0.34   | 0.10  | 0.03  | 33.63  | 0.00 | -0.12 | 0.97 | 0.00E+00 |

Supplementary Table 1: Distribution of raw and transformed metabolites, the correlation between raw and transformed metabolite values, and coefficient of variation of raw metabolites

|                                                     |      |       |       |       |        |      |       |         |          |
|-----------------------------------------------------|------|-------|-------|-------|--------|------|-------|---------|----------|
| 1-dihomo-linolenoyl-GPC (20:3n3 or 6)*              | 1.04 | 0.37  | -0.10 | -0.15 | 35.10  | 0.00 | -0.12 | 0.98    | 0.00E+00 |
| 1-dihomo-linoleoyl-GPC (20:2)*                      | 1.01 | 0.34  | -0.11 | 0.84  | 33.98  | 0.00 | -0.12 | 0.96    | 0.00E+00 |
| 2-arachidonoyl-GPC (20:4)*                          | 1.09 | 0.46  | -1.26 | 4.79  | 42.59  | 0.03 | -0.20 | 0.93    | 1.38E+00 |
| 2-oleoyl-GPC (18:1)*                                | 1.04 | 0.39  | 0.06  | 0.68  | 37.17  | 0.00 | -0.12 | 0.95    | 0.00E+00 |
| 2-linoleoyl-GPC (18:2)*                             | 1.07 | 0.44  | 0.06  | 0.55  | 40.85  | 0.00 | -0.12 | 0.94    | 0.00E+00 |
| 2-palmitoleoyl-GPC (16:1)*                          | 1.10 | 0.62  | -0.97 | 0.35  | 56.74  | 0.19 | -0.44 | 0.93    | 0.00E+00 |
| 2-palmitoyl-GPC (16:0)*                             | 1.00 | 0.29  | 0.05  | 0.51  | 28.78  | 0.00 | -0.12 | 0.97    | 0.00E+00 |
| 2-myristoyl-GPC (14:0)*                             | 1.02 | 0.46  | -0.17 | 0.09  | 44.78  | 0.00 | -0.12 | 0.96    | 0.00E+00 |
| 1-docosaheptaenoyl-GPC (22:6)*                      | 1.08 | 0.45  | 0.26  | 0.17  | 41.80  | 0.00 | -0.12 | 0.94    | 0.00E+00 |
| 1-palmitoyl-GPE (16:0)                              | 1.00 | 0.31  | -0.03 | -0.56 | 31.36  | 0.00 | -0.12 | 0.98    | 0.00E+00 |
| 1-oleoyl-GPE (18:1)                                 | 1.07 | 0.43  | 0.03  | 0.62  | 39.76  | 0.00 | -0.12 | 0.95    | 0.00E+00 |
| 1-linoleoyl-GPE (18:2)*                             | 1.03 | 0.38  | -0.28 | 0.52  | 36.77  | 0.00 | -0.12 | 0.97    | 0.00E+00 |
| 1-arachidonoyl-GPE (20:4n6)*                        | 1.04 | 0.26  | 0.07  | -0.05 | 24.96  | 0.00 | -0.12 | 0.98    | 0.00E+00 |
| N-acetylcitrulline                                  | 1.51 | 1.67  | 0.05  | 0.15  | 110.22 | 0.03 | -0.19 | 0.79    | 1.91E+01 |
| 2-hydroxypalmitate                                  | 1.07 | 0.32  | 0.03  | 0.39  | 30.04  | 0.00 | -0.12 | 0.97    | 9.69E-01 |
| docosapentaenoate (n6 DPA; 22:5n6)                  | 1.19 | 0.64  | -0.46 | 0.24  | 53.46  | 0.00 | -0.12 | 0.96    | 1.36E+01 |
| gulonate*                                           | 1.12 | 0.47  | 0.34  | 0.44  | 41.61  | 0.09 | -0.31 | 0.91    | 4.27E+00 |
| isobutyrylglycine                                   | 1.09 | 0.59  | -0.12 | -0.07 | 54.42  | 0.18 | -0.43 | 0.88 NA |          |
| glutarylcarntine (C5-DC)                            | 1.12 | 0.52  | -0.69 | 0.91  | 46.78  | 0.11 | -0.34 | 0.93    | 3.86E+00 |
| 2-methylmalonylcarntine (C4-DC)                     | 1.06 | 0.32  | 0.24  | -1.28 | 30.23  | 0.61 | -0.49 | 0.97 NA |          |
| tiglylcarntine (C5:1-DC)                            | 1.09 | 0.49  | -0.73 | 0.89  | 44.58  | 0.07 | -0.28 | 0.97    | 2.69E+00 |
| hydroquinone sulfate                                | 1.38 | 1.35  | -0.30 | 0.12  | 98.57  | 0.10 | -0.32 | 0.83    | 5.45E+00 |
| catechol sulfate                                    | 1.18 | 0.96  | -0.49 | 1.64  | 81.47  | 0.00 | -0.12 | 0.83    | 0.00E+00 |
| cholesterol sulfate                                 | 1.04 | 0.31  | -0.33 | 0.32  | 29.90  | 0.00 | -0.12 | 0.99    | 0.00E+00 |
| 7-alpha-hydroxy-3-oxo-4-cholestenate (7-Hoca)       | 1.07 | 0.35  | 0.35  | 0.06  | 32.32  | 0.00 | -0.12 | 0.96    | 0.00E+00 |
| tetradecanedioate (C14-DC)                          | 1.30 | 1.18  | 0.49  | 1.36  | 90.64  | 0.01 | -0.12 | 0.75    | 0.00E+00 |
| hexadecanedioate (C16-DC)                           | 1.20 | 0.94  | 0.54  | 1.13  | 78.01  | 0.00 | -0.12 | 0.79    | 0.00E+00 |
| octadecanedioate (C18-DC)                           | 1.08 | 0.52  | -1.67 | 4.96  | 48.46  | 0.04 | -0.23 | 0.96    | 2.38E+00 |
| undecanedioate (C11-DC)                             | 1.05 | 0.28  | 0.33  | 1.46  | 26.92  | 0.02 | -0.18 | 0.93    | 3.00E+01 |
| glycerophosphoethanolamine                          | 1.07 | 0.41  | 0.59  | 1.61  | 38.59  | 0.00 | -0.12 | 0.90    | 4.20E+00 |
| 3-(3-hydroxyphenyl)propionate                       | 2.48 | 5.89  | 0.28  | -0.41 | 237.76 | 0.27 | -0.50 | 0.58    | 2.63E+01 |
| ectoine                                             | 1.48 | 1.62  | -0.57 | 0.60  | 109.72 | 0.10 | -0.32 | 0.80    | 0.00E+00 |
| 2-oleoyl-GPE (18:1)*                                | 1.08 | 0.58  | -0.20 | 0.88  | 54.04  | 0.01 | -0.13 | 0.88    | 1.56E+01 |
| 2-palmitoyl-GPE (16:0)*                             | 1.03 | 0.46  | -0.36 | 0.79  | 44.54  | 0.02 | -0.16 | 0.95    | 3.46E+00 |
| 1-arachidonoyl-GPI (20:4)*                          | 1.08 | 0.38  | 0.28  | 0.23  | 35.26  | 0.00 | -0.12 | 0.95    | 3.66E+00 |
| 1-palmitoyl-GPI (16:0)                              | 1.17 | 0.63  | 0.00  | 0.53  | 54.07  | 0.01 | -0.13 | 0.92    | 1.39E-07 |
| glycolithocholate sulfate*                          | 1.21 | 0.94  | -0.53 | 0.65  | 77.82  | 0.00 | -0.12 | 0.92    | 0.00E+00 |
| tauroithocholate 3-sulfate                          | 1.39 | 1.33  | -0.96 | 2.04  | 95.67  | 0.02 | -0.16 | 0.88    | 0.00E+00 |
| deoxycarnitine                                      | 1.04 | 0.27  | -3.12 | 26.51 | 26.18  | 0.00 | -0.12 | 0.98    | 5.72E-01 |
| N6-succinyladenosine                                | 1.05 | 0.37  | -1.08 | 3.28  | 35.35  | 0.04 | -0.21 | 0.95    | 2.46E+01 |
| 1-ribosyl-imidazoleacetate*                         | 1.04 | 0.40  | -0.21 | 0.29  | 38.11  | 0.02 | -0.18 | 0.96    | 0.00E+00 |
| 2-arachidonoyl-GPE (20:4)*                          | 1.10 | 0.52  | -0.14 | 1.03  | 47.49  | 0.02 | -0.18 | 0.90    | 9.81E+00 |
| leucylleucine                                       | 1.86 | 2.24  | 0.40  | -0.26 | 120.43 | 0.27 | -0.51 | 0.79    | 1.36E+01 |
| N2-acetyllysine                                     | 1.00 | 0.38  | 1.87  | 1.94  | 37.67  | 1.95 | 2.53  | 0.97    | 4.92E+01 |
| alpha-hydroxycaproate                               | 1.18 | 0.69  | 1.07  | 0.13  | 58.74  | 1.04 | 0.01  | 0.84 NA |          |
| 3,4-dihydroxybutyrate                               | 1.07 | 0.33  | 0.53  | 0.64  | 31.15  | 0.00 | -0.12 | 0.94    | 1.04E-07 |
| indoleacetylglutamine                               | 1.36 | 1.49  | -0.07 | 0.66  | 109.78 | 0.06 | -0.26 | 0.76    | 4.73E+00 |
| hexanoylglutamine                                   | 1.26 | 0.99  | -0.08 | -0.01 | 78.55  | 0.00 | -0.12 | 0.88    | 0.00E+00 |
| N6-acetyllysine                                     | 1.01 | 0.18  | 0.31  | 0.44  | 17.46  | 0.00 | -0.12 | 0.98    | 0.00E+00 |
| dihomo-linolenate (20:3n3 or n6)                    | 1.15 | 0.51  | -0.33 | -0.11 | 44.42  | 0.00 | -0.12 | 0.98    | 0.00E+00 |
| mannitol/sorbitol                                   | 1.89 | 2.85  | 1.35  | 1.68  | 151.17 | 0.00 | -0.12 | 0.67    | 0.00E+00 |
| tryptophan betaine                                  | 1.54 | 1.93  | -0.67 | 0.65  | 125.71 | 0.01 | -0.13 | 0.82    | 0.00E+00 |
| 4-vinylphenol sulfate                               | 1.54 | 1.84  | -0.09 | -0.19 | 119.55 | 0.00 | -0.12 | 0.82    | 0.00E+00 |
| 4-ethylphenylsulfate                                | 2.54 | 5.98  | 0.78  | 1.09  | 235.86 | 0.00 | -0.12 | 0.59    | 0.00E+00 |
| thymol sulfate                                      | 3.74 | 6.86  | 0.14  | -0.55 | 183.97 | 0.00 | -0.12 | 0.75    | 1.15E+01 |
| 3-methyladipate                                     | 1.20 | 0.88  | -0.15 | -0.23 | 73.30  | 0.23 | -0.48 | 0.85    | 3.95E+00 |
| pyrraline                                           | 1.07 | 0.65  | -0.65 | 0.69  | 60.77  | 0.04 | -0.23 | 0.94    | 5.40E+00 |
| 2-linoleoyl-GPE (18:2)*                             | 1.08 | 0.56  | -0.40 | 1.02  | 51.78  | 0.01 | -0.15 | 0.92    | 0.00E+00 |
| 1-oleoyl-GPI (18:1)                                 | 1.11 | 0.57  | 0.01  | 0.35  | 51.13  | 0.01 | -0.13 | 0.92    | 0.00E+00 |
| 1-linoleoyl-GPI (18:2)*                             | 1.10 | 0.48  | 0.10  | 0.31  | 43.64  | 0.00 | -0.12 | 0.93    | 2.52E+00 |
| 1-palmitoleoyl-GPE (16:1)*                          | 1.32 | 1.08  | -0.13 | -0.45 | 82.07  | 0.20 | -0.45 | 0.88    | 1.34E+01 |
| 1-palmitoleoyl-GPI (16:1)*                          | 1.55 | 2.25  | 0.72  | -0.16 | 145.59 | 0.68 | -0.44 | 0.63    | 2.51E+01 |
| desmethylnaproxen                                   | 2.19 | 5.13  | 4.67  | 23.53 | 234.49 | 3.77 | 12.95 | 0.60    | 1.28E-04 |
| desmethylnaproxen sulfate                           | 7.77 | 24.16 | 3.15  | 8.83  | 311.42 | 2.79 | 6.52  | 0.55    | 5.91E+01 |
| 2-hydroxyacetaminophen sulfate*                     | 8.51 | 16.08 | 2.04  | 2.96  | 189.22 | 1.54 | 1.18  | 0.77    | 1.95E-05 |
| 2-methoxyacetaminophen sulfate*                     | 5.45 | 12.41 | 2.62  | 5.74  | 227.89 | 2.18 | 3.48  | 0.64    | 4.05E+01 |
| 2-methoxyacetaminophen glucuronide*                 | 3.05 | 6.16  | 2.96  | 7.53  | 202.32 | 2.67 | 5.82  | 0.68    | 0.00E+00 |
| 3-(cystein-S-yl)acetaminophen*                      | 1.44 | 0.88  | 4.42  | 19.08 | 61.64  | 4.09 | 15.46 | 0.94    | 2.66E+01 |
| o-cresol sulfate                                    | 2.47 | 3.56  | 0.28  | -0.53 | 144.59 | 0.07 | -0.28 | 0.80    | 1.35E+01 |
| dimethylarginine (SDMA + ADMA)                      | 1.02 | 0.16  | -0.31 | 0.39  | 16.04  | 0.00 | -0.12 | 1.00    | 0.00E+00 |
| gamma-glutamylalanine                               | 1.63 | 1.47  | 0.23  | -0.72 | 90.09  | 0.33 | -0.53 | 0.86    | 3.92E+01 |
| N-acetyserine                                       | 1.03 | 0.21  | 0.44  | 0.47  | 20.18  | 0.00 | -0.12 | 0.97    | 0.00E+00 |
| 1-stearoyl-2-oleoyl-GPE (18:0/18:1)                 | 1.12 | 0.57  | 0.34  | 0.11  | 50.70  | 0.00 | -0.12 | 0.91    | 0.00E+00 |
| chiro-inositol                                      | 1.87 | 3.27  | 2.03  | 3.74  | 175.00 | 1.45 | 0.92  | 0.65    | 3.54E+01 |
| 4-allylphenol sulfate                               | 1.47 | 1.89  | -0.11 | 0.04  | 128.28 | 0.00 | -0.12 | 0.77    | 0.00E+00 |
| 1-stearoyl-2-arachidonoyl-GPC (18:0/20:4)           | 1.01 | 0.17  | -0.31 | -0.08 | 16.99  | 0.00 | -0.12 | 1.00    | 1.03E+00 |
| 1-palmitoyl-2-linoleoyl-GPE (16:0/18:2)             | 1.09 | 0.53  | 0.05  | -0.39 | 48.24  | 0.00 | -0.12 | 0.96    | 0.00E+00 |
| 1-stearoyl-2-arachidonoyl-GPS (18:0/20:4)           | 1.67 | 1.54  | -0.50 | -0.51 | 92.66  | 0.23 | -0.47 | 0.89    | 0.00E+00 |
| sphinganine-1-phosphate                             | 1.14 | 0.40  | 0.23  | 0.44  | 34.98  | 0.00 | -0.12 | 0.95    | 0.00E+00 |
| glycosyl-N-nervonoyl-sphingosine (d18:1/24:1)*      | 1.01 | 0.32  | -0.39 | 0.23  | 32.15  | 0.00 | -0.12 | 0.99 NA |          |
| glycosyl-N-stearoyl-sphingosine (d18:1/18:0)        | 1.04 | 0.32  | -0.20 | 0.48  | 31.17  | 0.00 | -0.12 | 0.98    | 1.54E+00 |
| cyclo(leu-pro)                                      | 1.27 | 1.02  | 0.07  | -0.98 | 80.63  | 0.36 | -0.54 | 0.89    | 1.01E+01 |
| succinylcarntine (C4-DC)                            | 1.07 | 0.48  | -0.44 | 0.59  | 45.21  | 0.14 | -0.38 | 0.87    | 3.11E+00 |
| bilirubin (E,E)*                                    | 1.05 | 0.56  | -2.17 | 7.49  | 53.59  | 0.03 | -0.19 | 0.94    | 0.00E+00 |
| bilirubin (E,Z or Z,E)*                             | 1.03 | 0.51  | -1.62 | 2.17  | 49.37  | 0.11 | -0.35 | 0.98    | 8.02E+00 |
| N-methylproline                                     | 2.47 | 3.94  | 0.60  | -0.40 | 159.59 | 0.00 | -0.12 | 0.75    | 0.00E+00 |
| beta-cryptoxanthin                                  | 1.35 | 1.25  | -0.86 | 1.69  | 93.09  | 0.05 | -0.25 | 0.87    | 0.00E+00 |
| 5alpha-androstan-3beta,17beta-diol disulfate        | 2.05 | 4.89  | -0.17 | 0.24  | 238.47 | 0.00 | -0.12 | 0.52    | 0.00E+00 |
| 5alpha-pregnan-3beta,20alpha-diol disulfate         | 4.49 | 39.59 | 0.85  | 5.15  | 883.46 | 0.02 | -0.18 | 0.24    | 0.00E+00 |
| glycochenolate sulfate*                             | 1.16 | 0.69  | 0.05  | 0.84  | 59.27  | 0.00 | -0.12 | 0.89    | 0.00E+00 |
| taurochenolate sulfate*                             | 1.30 | 0.93  | -0.22 | 0.15  | 71.42  | 0.01 | -0.13 | 0.92    | 3.12E+00 |
| androstenediol (3beta,17beta) disulfate (1)         | 1.80 | 3.68  | 0.17  | 0.97  | 204.95 | 0.00 | -0.12 | 0.58    | 0.00E+00 |
| pregnenediol disulfate (C21H34O8S2)*                | 1.35 | 1.28  | -0.27 | 0.25  | 94.47  | 0.00 | -0.12 | 0.85    | 0.00E+00 |
| androstenediol (3beta,17beta) disulfate (2)         | 1.18 | 0.83  | -0.36 | 0.28  | 70.31  | 0.00 | -0.12 | 0.91    | 0.00E+00 |
| 21-hydroxypregnenolone disulfate                    | 1.18 | 0.74  | -0.54 | 0.57  | 62.99  | 0.02 | -0.16 | 0.95    | 0.00E+00 |
| 5alpha-androstan-3alpha,17alpha-diol monosulfate    | 1.28 | 0.88  | 0.07  | -1.30 | 68.63  | 0.52 | -0.53 | 0.92    | 8.45E+00 |
| 5alpha-pregnan-3beta,20beta-diol monosulfate (1)    | 3.44 | 21.89 | 1.30  | 5.08  | 636.92 | 0.11 | -0.34 | 0.30    | 0.00E+00 |
| 5alpha-pregnan-3beta,20alpha-diol monosulfate (2)   | 4.52 | 33.64 | 1.71  | 7.20  | 744.63 | 0.02 | -0.16 | 0.28    | 0.00E+00 |
| 5alpha-pregnan-diol disulfate                       | 4.62 | 27.05 | 1.45  | 2.75  | 586.31 | 0.82 | -0.31 | 0.33    | 0.00E+00 |
| 5alpha-androstan-3alpha,17beta-diol disulfate       | 1.87 | 2.66  | 0.54  | -1.10 | 142.25 | 0.72 | -0.41 | 0.76    | 1.45E+01 |
| 5alpha-androstan-3alpha,17beta-diol monosulfate (1) | 1.35 | 1.32  | -0.49 | 0.09  | 97.79  | 0.05 | -0.25 | 0.87    | 0.00E+00 |
| 5alpha-androstan-3beta,17alpha-diol disulfate       | 1.50 | 1.57  | -0.04 | -1.31 | 105.20 | 0.43 | -0.55 | 0.87    | 0.00E+00 |
| 5alpha-androstan-3beta,17beta-diol monosulfate (2)  | 1.41 | 1.46  | -0.31 | -0.33 | 104.39 | 0.15 | -0.40 | 0.82    | 0.00E+00 |
| androstenediol (3alpha, 17alpha) monosulfate (2)    | 1.20 | 0.82  | -0.70 | 0.69  | 68.87  | 0.06 | -0.26 | 0.92    | 0.00E+00 |
| androstenediol (3alpha, 17alpha) monosulfate (3)    | 1.28 | 1.04  | -0.34 | 0.19  | 81.56  | 0.00 | -0.12 | 0.89    | 0.00E+00 |
| androstenediol (3beta,17beta) monosulfate (1)       | 1.46 | 1.51  | -0.03 | 0.32  | 103.64 | 0.00 | -0.12 | 0.82    | 0.00E+00 |
| androstenediol (3beta,17beta) monosulfate (2)       | 1.58 | 2.48  | -0.24 | -0.25 | 156.85 | 0.26 | -0.50 | 0.63    | 0.00E+00 |

Supplementary Table 1: Distribution of raw and transformed metabolites, the correlation between raw and transformed metabolite values, and coefficient of variation of raw metabolites

|                                             |       |        |       |        |         |       |        |         |          |
|---------------------------------------------|-------|--------|-------|--------|---------|-------|--------|---------|----------|
| 5alpha-pregnan-3beta-ol,20-one sulfate      | 4.05  | 17.14  | 2.06  | 4.28   | 423.81  | 1.69  | 1.63   | 0.42    | 0.00E+00 |
| 4-hydroxycoumarin                           | 1.61  | 1.91   | -0.19 | -0.77  | 118.37  | 0.27  | -0.50  | 0.81    | 0.00E+00 |
| 1-docosaheptaenyl-GPE (22:6)*               | 1.03  | 0.34   | 0.08  | 0.07   | 32.66   | 0.00  | -0.12  | 0.97    | 0.00E+00 |
| 2-docosaheptaenyl-GPE (22:6)*               | 1.12  | 0.59   | -0.29 | -1.11  | 52.94   | 0.38  | -0.54  | 0.95    |          |
| 1-docosapentaenyl-GPC (22:5n3)*             | 1.04  | 0.39   | -0.21 | 0.82   | 37.77   | 0.00  | -0.12  | 0.96    | 0.00E+00 |
| 1-docosapentaenyl-GPE (22:5n6)*             | 1.09  | 0.61   | -1.26 | 3.55   | 56.60   | 0.02  | -0.16  | 0.95    | 4.83E+00 |
| pregnenediol sulfate (C21H34O5S)*           | 1.24  | 0.94   | -0.35 | 0.97   | 76.05   | 0.00  | -0.12  | 0.87    | 0.00E+00 |
| 2-hydroxyglutamate                          | 1.13  | 0.48   | -0.25 | 2.35   | 41.96   | 0.02  | -0.18  | 0.91    | 2.24E+01 |
| gamma-CEHC                                  | 1.17  | 0.84   | -0.78 | 2.35   | 72.30   | 0.01  | -0.13  | 0.89    | 0.00E+00 |
| N-acetyl-beta-alanine                       | 1.03  | 0.29   | -0.10 | 0.39   | 27.89   | 0.00  | -0.12  | 0.98    | 1.15E+00 |
| 5-methylthioribose**                        | 1.07  | 0.39   | -0.53 | -0.52  | 36.22   | 0.25  | -0.49  | 0.97 NA |          |
| sphingomyelin (d18:1/18:1, d18:2/18:0)      | 1.03  | 0.26   | -0.11 | 0.10   | 25.26   | 0.00  | -0.12  | 0.99    | 0.00E+00 |
| palmitoyl sphingomyelin (d18:1/16:0)        | 1.00  | 0.13   | -0.27 | 0.68   | 13.21   | 0.00  | -0.12  | 1.00    | 1.76E+00 |
| cysteine sulfinic acid                      | 1.43  | 1.55   | 1.36  | 2.50   | 108.32  | 0.57  | -0.51  | 0.68    | 2.21E+01 |
| 3-hydroxyhippurate                          | 2.16  | 3.53   | 0.05  | 0.48   | 163.39  | 0.00  | -0.12  | 0.74    | 0.00E+00 |
| 16a-hydroxy DHEA 3-sulfate                  | 1.43  | 1.44   | -0.23 | 0.18   | 101.07  | 0.00  | -0.12  | 0.84    | 0.00E+00 |
| 17alpha-hydroxypregnenolone 3-sulfate       | 1.39  | 1.13   | 0.69  | -0.50  | 81.02   | 0.62  | -0.49  | 0.83    | 9.02E+00 |
| pregnenolone sulfate                        | 1.32  | 1.06   | -0.41 | 0.86   | 80.60   | 0.01  | -0.15  | 0.88    | 0.00E+00 |
| 5-HEPE                                      | 5.08  | 14.79  | 1.24  | 1.37   | 291.43  | 0.62  | -0.49  | 0.55    | 4.36E+01 |
| 5-HETE                                      | 12.24 | 40.25  | 1.18  | 1.93   | 329.25  | 0.42  | -0.55  | 0.56    | 1.89E+01 |
| andro steroid monosulfate C19H28O6S (1)*    | 1.39  | 1.59   | -0.11 | -0.18  | 114.54  | 0.15  | -0.40  | 0.74    | 0.00E+00 |
| ergothioneine                               | 1.31  | 1.14   | -0.06 | 0.45   | 87.04   | 0.01  | -0.13  | 0.85    | 0.00E+00 |
| 1-margarol-GPE (17:0)*                      | 1.07  | 0.52   | -1.67 | 2.96   | 48.34   | 0.12  | -0.36  | 0.94    | 1.53E+00 |
| 1-pentadecanoyl-GPC (15:0)*                 | 0.98  | 0.38   | -0.38 | 0.00   | 39.03   | 0.00  | -0.12  | 0.99    | 1.05E+00 |
| 5-methylmethionine                          | 1.66  | 2.46   | 0.64  | -0.80  | 148.22  | 0.77  | -0.37  | 0.70    | 1.24E+01 |
| indole-3-carboxylate                        | 1.09  | 0.47   | -0.67 | 0.80   | 43.36   | 0.16  | -0.41  | 0.90    | 1.80E+01 |
| 13-HODE + 9-HODE                            | 2.03  | 3.47   | 1.25  | 2.64   | 171.13  | 0.01  | -0.13  | 0.65    | 0.00E+00 |
| tridecenedioate (C13:1-DC)*                 | 1.13  | 0.67   | -0.76 | 1.27   | 59.07   | 0.00  | -0.12  | 0.95    | 0.00E+00 |
| N-acetyl-3-methylhistidine*                 | 1.45  | 1.26   | -0.03 | -0.97  | 86.96   | 0.33  | -0.53  | 0.88    | 0.00E+00 |
| 4-cholesten-3-one                           | 1.17  | 0.70   | 0.97  | 3.69   | 59.95   | 0.01  | -0.13  | 0.76    | 1.36E+01 |
| cinnamoylglycine                            | 1.44  | 1.70   | -0.81 | -0.02  | 117.77  | 0.05  | -0.24  | 0.85    | 0.00E+00 |
| stearoyl ethanolamide                       | 1.07  | 0.30   | -0.59 | 0.73   | 28.19   | 0.00  | -0.12  | 0.99    | 3.83E+00 |
| cis-4-decenoylcarnitine (C10:1)             | 1.10  | 0.56   | 0.15  | 0.14   | 51.35   | 0.00  | -0.12  | 0.92    | 0.00E+00 |
| 25,3R-dihydroxybutyrate                     | 1.16  | 0.59   | 0.20  | -0.32  | 50.70   | 0.00  | -0.12  | 0.94    | 0.00E+00 |
| phenylalanylphenylalanine                   | 1.00  | 0.20   | -0.54 | 0.39   | 19.69   | 0.00  | -0.12  | 1.00    | 2.33E+00 |
| (12 or 13)-methylmyristate (a15:0 or i15:0) | 1.28  | 0.83   | -0.75 | 1.09   | 65.14   | 0.02  | -0.18  | 0.94    | 2.82E+01 |
| (16 or 17)-methylstearate (a19:0 or i19:0)  | 1.20  | 0.63   | -0.13 | 0.09   | 53.10   | 0.00  | -0.12  | 0.94    | 0.00E+00 |
| 2R,3R-dihydroxybutyrate                     | 1.07  | 0.42   | 0.02  | 0.45   | 39.03   | 0.00  | -0.12  | 0.95    | 0.00E+00 |
| 4-methylbenzenesulfonate                    | 23.84 | 368.76 | 7.63  | 103.97 | 1549.33 | 0.36  | -0.54  | 0.18    | 0.00E+00 |
| alpha-ketoglutarate*                        | 1.03  | 0.24   | 0.22  | 0.57   | 23.61   | 0.00  | -0.12  | 0.96    | 0.00E+00 |
| ibuprofen acyl glucuronide                  | 8.58  | 23.89  | 3.43  | 11.17  | 278.81  | 2.94  | 7.35   | 0.58    | 0.00E+00 |
| 3-hydroxyquinine                            | 1.00  | 0.51   | 18.41 | 338.02 | 51.29   | 18.41 | 338.02 | 1.00    | 4.73E+01 |
| 2,3-dihydroxyisovalerate                    | 4.16  | 11.01  | 0.97  | 0.59   | 264.73  | 0.00  | -0.12  | 0.59    | 0.00E+00 |
| allopurinol riboside                        | 0.89  | 0.15   | 18.41 | 338.02 | 16.74   | 18.41 | 338.02 | 1.00    | 1.09E+01 |
| 3-methylglutaconate                         | 1.10  | 0.53   | 0.31  | 0.18   | 47.97   | 0.00  | -0.12  | 0.91    | 0.00E+00 |
| cysteinylglycine disulfide*                 | 1.14  | 0.70   | -0.43 | 0.55   | 61.57   | 0.00  | -0.12  | 0.94    | 7.82E+00 |
| isoursodeoxycholate                         | 2.05  | 3.61   | 0.33  | 0.04   | 176.31  | 0.00  | -0.12  | 0.65    | 0.00E+00 |
| oxypurinol                                  | 0.98  | 0.03   | 18.41 | 338.02 | 3.55    | 18.41 | 338.02 | 1.00    | 7.61E+01 |
| formiminoglutamate                          | 1.14  | 0.70   | 0.12  | -1.67  | 61.39   | 0.73  | -0.40  | 0.91    | 3.72E+01 |
| hydantoin-5-propionate                      | 1.07  | 0.53   | -0.77 | 1.02   | 49.59   | 0.05  | -0.25  | 0.96    | 0.00E+00 |
| sulfate*                                    | 1.11  | 0.46   | 0.44  | 0.51   | 41.24   | 0.00  | -0.12  | 0.92    | 6.05E+00 |
| 4-hydroxy-2-oxoglutaric acid                | 1.02  | 0.49   | -2.42 | 5.60   | 47.86   | 0.07  | -0.28  | 0.98    | 5.77E+00 |
| 4-hydroxyglutamate                          | 1.21  | 0.86   | -0.20 | -1.16  | 70.50   | 0.44  | -0.55  | 0.87    | 6.71E+00 |
| L-urobilin                                  | 2.44  | 4.44   | 0.42  | -0.89  | 182.20  | 0.56  | -0.52  | 0.69    | 1.66E+01 |
| pantoate                                    | 1.60  | 2.85   | -0.43 | 2.36   | 178.68  | 0.12  | -0.36  | 0.57    | 2.84E+01 |
| hydroxycotinine                             | 1.12  | 1.02   | 2.19  | 3.28   | 91.65   | 2.15  | 3.37   | 0.87    | 0.00E+00 |
| cotinine N-oxide                            | 1.14  | 0.67   | 2.56  | 5.47   | 59.46   | 2.26  | 3.83   | 0.95    |          |
| atenolol                                    | 1.52  | 1.41   | 10.70 | 127.74 | 93.03   | 8.21  | 66.41  | 0.86    | 1.15E-05 |
| diphenhydramine                             | 4.09  | 6.13   | 3.54  | 11.61  | 150.13  | 3.10  | 8.35   | 0.82    | 0.00E+00 |
| hydrochlorothiazide                         | 1.27  | 1.24   | 2.75  | 6.22   | 97.60   | 2.48  | 4.86   | 0.92    | 2.61E+01 |
| 5-methylcysteine                            | 1.18  | 0.69   | 0.51  | 0.02   | 58.16   | 0.00  | -0.12  | 0.90    | 0.00E+00 |
| androsterone glucuronide                    | 1.25  | 0.99   | -0.63 | 0.83   | 79.56   | 0.01  | -0.15  | 0.91    | 0.00E+00 |
| argininate*                                 | 1.21  | 0.78   | -0.04 | 0.56   | 64.47   | 0.02  | -0.18  | 0.89    | 0.00E+00 |
| solanidine                                  | 2.10  | 3.85   | 1.44  | 1.32   | 183.35  | 1.17  | 0.25   | 0.62    | 0.00E+00 |
| 2-oxoarginine*                              | 1.27  | 0.96   | 0.22  | 0.44   | 76.27   | 0.08  | -0.30  | 0.83    | 2.73E+01 |
| cis-4-decenoate (10:1n6)*                   | 1.34  | 1.29   | 0.49  | 1.86   | 96.21   | 0.00  | -0.12  | 0.72    | 0.00E+00 |
| atorvastatin (lipitor)                      | 1.42  | 1.72   | 5.14  | 30.11  | 121.45  | 3.68  | 12.26  | 0.73    | 0.00E+00 |
| sertraline                                  | 1.16  | 0.66   | 6.34  | 40.22  | 57.07   | 6.08  | 35.79  | 0.94    | 7.03E+01 |
| gabapentin                                  | 1.57  | 2.31   | 4.33  | 17.33  | 147.92  | 4.34  | 17.62  | 0.69    | 0.00E+00 |
| venlafaxine                                 | 0.85  | 0.21   | 18.41 | 338.02 | 24.97   | 18.41 | 338.02 | 1.00    | 6.06E+00 |
| quetiapine                                  | 0.92  | 0.55   | 18.41 | 338.02 | 59.25   | 18.41 | 338.02 | 1.00    | 5.11E+01 |
| ethyl glucuronide                           | 2.98  | 9.17   | 0.50  | 1.35   | 308.33  | 0.21  | -0.46  | 0.51    | 5.87E+01 |
| 1-behenoyl-GPC (22:0)                       | 1.05  | 0.51   | -0.77 | 0.62   | 49.01   | 0.12  | -0.36  | 0.95    | 2.50E+01 |
| 1-erucyl-GPC (22:1)*                        | 1.08  | 0.54   | 0.18  | -0.84  | 50.65   | 0.44  | -0.55  | 0.90 NA |          |
| 1-adrenoyl-GPC (22:4)*                      | 1.07  | 0.44   | -0.39 | 1.69   | 40.71   | 0.00  | -0.12  | 0.96    | 0.00E+00 |
| 1-lignoceryl-GPC (24:0)                     | 1.03  | 0.45   | -0.23 | -1.01  | 44.02   | 0.32  | -0.53  | 0.97    | 1.00E+01 |
| 1-nervonoyl-GPC (24:1n9)*                   | 1.10  | 0.46   | 0.20  | -1.30  | 41.61   | 0.56  | -0.52  | 0.97 NA |          |
| 1-(1-enyl-palmitoyl)-GPC (P-16:0)*          | 1.06  | 0.43   | 0.49  | 0.97   | 40.87   | 0.00  | -0.12  | 0.91    | 0.00E+00 |
| 1-(1-enyl-oleoyl)-GPC (P-18:1)*             | 1.11  | 0.77   | 0.20  | 1.78   | 69.54   | 0.11  | -0.34  | 0.77    | 5.68E+00 |
| 1-(1-enyl-stearoyl)-GPC (P-18:0)*           | 1.16  | 0.79   | 0.07  | -0.78  | 68.52   | 0.43  | -0.55  | 0.83    | 4.87E+00 |
| 1-methyl-5-imidazoleacetate                 | 1.34  | 1.32   | -0.94 | 1.76   | 98.46   | 0.02  | -0.16  | 0.84    | 0.00E+00 |
| glycoursodeoxycholate                       | 1.93  | 2.91   | 0.09  | -0.11  | 150.98  | 0.00  | -0.12  | 0.73    | 0.00E+00 |
| taoursodeoxycholate                         | 1.75  | 2.58   | 1.82  | 2.99   | 147.59  | 1.25  | 0.43   | 0.70    | 4.08E-05 |
| 5-methylcysteine sulfoxide                  | 1.33  | 1.24   | 0.53  | 0.17   | 93.51   | 0.00  | -0.12  | 0.82    | 0.00E+00 |
| benzoylgonine                               | 1.29  | 1.16   | 5.96  | 34.74  | 89.90   | 5.48  | 28.79  | 0.94    | 2.40E+01 |
| (14 or 15)-methylpalmitate (a17:0 or i17:0) | 1.22  | 0.74   | -0.47 | 0.28   | 60.82   | 0.00  | -0.12  | 0.95    | 0.00E+00 |
| eicosanedioate (C20-DC)                     | 1.11  | 0.53   | 0.04  | 0.15   | 48.42   | 0.00  | -0.12  | 0.93    | 0.00E+00 |
| docosadioate (C22-DC)                       | 1.21  | 0.67   | 0.26  | -0.08  | 55.32   | 0.00  | -0.12  | 0.91    | 5.42E+00 |
| 16-hydroxypalmitate                         | 1.12  | 0.48   | 0.91  | 2.32   | 43.51   | 0.00  | -0.12  | 0.85    | 0.00E+00 |
| quinine                                     | 1.00  | 0.68   | 18.41 | 338.02 | 68.48   | 18.41 | 338.02 | 1.00    | 6.45E+01 |
| oleoyl-linoleoyl-glycerol (18:1/18:2) [1]   | 1.12  | 0.57   | 0.20  | -0.22  | 50.57   | 0.00  | -0.12  | 0.93    | 9.27E+00 |
| oleoyl-linoleoyl-glycerol (18:1/18:2) [2]   | 1.11  | 0.52   | 0.17  | -0.43  | 46.96   | 0.00  | -0.12  | 0.95    | 4.11E+00 |
| 1-(1-enyl-palmitoyl)-GPE (P-16:0)*          | 1.14  | 0.57   | 0.79  | 1.48   | 49.88   | 0.00  | -0.12  | 0.86    | 7.05E+00 |
| 1-(1-enyl-stearoyl)-GPE (P-18:0)*           | 1.11  | 0.54   | 0.64  | 1.46   | 48.54   | 0.00  | -0.12  | 0.87    | 1.96E+00 |
| 2-stearoyl-GPI (18:0)*                      | 1.13  | 0.54   | -0.35 | 1.27   | 47.92   | 0.04  | -0.23  | 0.91    | 2.78E+00 |
| alpha-CEHC glucuronide*                     | 2.08  | 3.23   | 1.53  | 1.82   | 156.02  | 0.84  | -0.28  | 0.72    | 1.80E+01 |
| 2-oxindole-3-acetate                        | 1.39  | 1.56   | 0.50  | -0.38  | 112.53  | 0.51  | -0.53  | 0.70    | 1.71E+01 |
| N-oleoyltaurine                             | 1.17  | 0.65   | -0.45 | -0.19  | 55.28   | 0.15  | -0.39  | 0.94    | 1.21E+01 |
| linoleoylcarnitine (C18:2)*                 | 1.03  | 0.31   | -0.11 | 0.01   | 29.76   | 0.00  | -0.12  | 0.98    | 0.00E+00 |
| isoleucylglycine                            | 1.12  | 0.63   | 0.73  | 2.99   | 56.54   | 0.02  | -0.18  | 0.77    | 3.32E+00 |
| leucylglycine                               | 1.18  | 0.50   | -0.88 | 2.40   | 42.51   | 0.07  | -0.28  | 0.92    | 1.43E+01 |
| phenylalanylisoleucine                      | 1.09  | 0.43   | 1.27  | 0.97   | 39.66   | 1.02  | -0.03  | 0.89 NA |          |
| phenylalanylleucine                         | 1.01  | 0.25   | -0.65 | 0.79   | 25.17   | 0.02  | -0.18  | 1.00 NA |          |
| N-palmitoyltaurine                          | 1.19  | 0.79   | 0.59  | -0.67  | 66.08   | 0.67  | -0.45  | 0.86 NA |          |
| N-stearoyltaurine                           | 1.09  | 0.51   | -0.47 | 0.12   | 47.01   | 0.09  | -0.32  | 0.96    | 1.17E+01 |
| 2-O-methylascorbic acid                     | 1.04  | 0.34   | -0.64 | 2.46   | 32.47   | 0.00  | -0.12  | 0.98    | 0.00E+00 |
| beta-citrylglutamate                        | 1.08  | 0.37   | 0.03  | 0.24   | 34.14   | 0.00  | -0.12  | 0.96    | 3.23E+00 |

Supplementary Table 1: Distribution of raw and transformed metabolites, the correlation between raw and transformed metabolite values, and coefficient of variation of raw metabolites

|                                         |       |        |       |        |        |       |        |         |          |
|-----------------------------------------|-------|--------|-------|--------|--------|-------|--------|---------|----------|
| rosuvastatin                            | 1.09  | 0.54   | 7.65  | 62.18  | 49.31  | 6.92  | 46.75  | 0.88    | 3.92E+01 |
| trimethylamine N-oxide                  | 1.24  | 0.97   | 0.21  | 2.15   | 78.19  | 0.00  | -0.12  | 0.80    | 0.00E+00 |
| N6-methyllysine                         | 1.80  | 1.72   | 0.39  | -0.91  | 95.97  | 0.00  | -0.12  | 0.88    | 0.00E+00 |
| dihydroferulate                         | 1.64  | 3.20   | 1.10  | 0.87   | 195.95 | 0.87  | -0.24  | 0.54    | 8.98E+00 |
| imidazole propionate                    | 1.16  | 0.62   | -0.12 | 1.06   | 53.58  | 0.06  | -0.27  | 0.88    | 8.61E+00 |
| citalopram/escitalopram                 | 1.25  | 1.10   | 4.84  | 22.11  | 87.81  | 4.82  | 22.02  | 0.92    | 9.02E+01 |
| duloxetine                              | 0.96  | 0.23   | 18.41 | 338.02 | 24.35  | 18.41 | 338.02 | 1.00 NA |          |
| pregnanediol-3-glucuronide              | 2.56  | 10.36  | 0.91  | 3.09   | 404.92 | 0.05  | -0.25  | 0.40    | 0.00E+00 |
| (15:2)-anacardic acid                   | 1.15  | 0.72   | 8.55  | 82.06  | 62.57  | 5.76  | 31.95  | 0.87    | 0.00E+00 |
| alliin                                  | 1.80  | 3.06   | 0.88  | -0.24  | 169.64 | 0.76  | -0.38  | 0.69    | 2.31E+01 |
| serlytyrosine                           | 2.06  | 5.43   | 3.06  | 9.57   | 264.05 | 2.51  | 5.03   | 0.51    | 3.53E+01 |
| histidylalanine                         | 4.00  | 13.99  | 2.46  | 5.14   | 350.46 | 2.18  | 3.48   | 0.46    | 2.78E+01 |
| phenylalanylglycine                     | 1.03  | 0.27   | 0.40  | -1.16  | 26.41  | 0.62  | -0.49  | 0.98 NA |          |
| phenylalanylmethionine                  | 1.03  | 0.29   | -1.31 | 3.00   | 28.53  | 0.03  | -0.19  | 0.99    | 6.12E+00 |
| phenylalanytryptophan                   | 0.99  | 0.40   | -2.15 | 4.72   | 40.04  | 0.00  | -0.12  | 0.98    | 1.14E-03 |
| tyrosyllysine                           | 1.67  | 2.11   | 2.79  | 6.94   | 126.23 | 2.41  | 4.53   | 0.79 NA |          |
| tryptophylasparagine                    | 1.13  | 0.70   | 2.82  | 6.50   | 62.39  | 2.75  | 6.28   | 0.97    | 2.02E+01 |
| aspartylaspartate                       | 1.05  | 0.37   | -0.21 | -0.91  | 34.83  | 0.31  | -0.52  | 0.97    | 3.98E+00 |
| valylalanine                            | 3.42  | 7.65   | 1.57  | 2.66   | 224.03 | 0.55  | -0.52  | 0.62    | 7.67E+01 |
| valylglycine                            | 1.35  | 1.03   | 0.09  | 0.24   | 76.44  | 0.10  | -0.33  | 0.84    | 1.68E+01 |
| valylphenylalanine                      | 3.29  | 6.86   | 1.87  | 3.43   | 208.63 | 0.48  | -0.54  | 0.64 NA |          |
| methionylalanine                        | 15.74 | 28.06  | 1.40  | 0.78   | 178.55 | 0.98  | -0.09  | 0.79    | 1.03E+02 |
| N-palmitoylglycine                      | 1.08  | 0.40   | -0.55 | 1.38   | 37.32  | 0.01  | -0.15  | 0.97    | 2.00E+00 |
| mannonate*                              | 1.08  | 0.36   | 0.55  | 0.79   | 33.49  | 0.00  | -0.12  | 0.93    | 0.00E+00 |
| norfluoetine                            | 1.14  | 0.91   | 6.30  | 40.61  | 79.96  | 5.76  | 31.95  | 0.87    | 1.52E+01 |
| 2-stearoyl-GPE (18:0)*                  | 1.05  | 0.43   | -0.02 | 0.53   | 40.78  | 0.00  | -0.12  | 0.95    | 0.00E+00 |
| (R)-3-hydroxybutyrylcarnitine           | 1.41  | 1.22   | 0.41  | -0.90  | 86.47  | 0.54  | -0.53  | 0.85    | 1.23E+01 |
| N-octanoylglycine                       | 1.24  | 0.74   | -0.13 | -0.56  | 59.52  | 0.29  | -0.52  | 0.85    | 2.18E+01 |
| doxylamine                              | 0.95  | 0.55   | 9.15  | 82.39  | 57.53  | 9.20  | 83.56  | 0.95    | 0.00E+00 |
| triarterene                             | 1.00  | 0.62   | 18.41 | 338.02 | 61.60  | 18.41 | 338.02 | 1.00    | 2.52E+01 |
| diltiazem                               | 0.92  | 0.31   | 9.88  | 99.96  | 33.58  | 9.20  | 83.58  | 0.97    | 1.03E+01 |
| feloxenadine                            | 12.24 | 28.41  | 8.90  | 87.11  | 232.56 | 6.08  | 35.80  | 0.68    | 4.22E+01 |
| verapamil                               | 1.20  | 0.48   | 11.18 | 128.16 | 39.69  | 10.63 | 112.06 | 0.90    | 5.19E+01 |
| N-acetylcarnosine                       | 1.11  | 0.53   | -0.07 | -0.21  | 48.28  | 0.00  | -0.12  | 0.96    | 4.79E-07 |
| margaroylcarnitine (C17)*               | 1.06  | 0.38   | -0.45 | 0.36   | 35.93  | 0.00  | -0.12  | 0.99    | 2.56E+00 |
| N-methyltaurine                         | 1.57  | 1.82   | 0.53  | -0.86  | 116.23 | 0.58  | -0.51  | 0.83    | 8.91E-06 |
| histidine betaine (hercynine)*          | 1.47  | 1.67   | 0.58  | 0.74   | 114.20 | 0.01  | -0.13  | 0.75    | 1.05E+01 |
| glycochocholate                         | 1.51  | 1.48   | -0.02 | -0.74  | 97.66  | 0.20  | -0.45  | 0.86    | 1.05E+01 |
| 2-hydroxydecanoate                      | 1.19  | 0.74   | 0.39  | 1.33   | 62.47  | 0.00  | -0.12  | 0.85    | 0.00E+00 |
| 3-methyl catechol sulfate (2)           | 1.79  | 2.07   | 1.04  | -0.01  | 115.92 | 0.91  | -0.19  | 0.81    | 1.07E+01 |
| 4-methylcatechol sulfate                | 1.36  | 1.29   | -0.15 | 0.90   | 94.79  | 0.00  | -0.12  | 0.83    | 0.00E+00 |
| 3-methyl catechol sulfate (1)           | 1.76  | 2.05   | -0.08 | -0.61  | 116.22 | 0.01  | -0.13  | 0.86    | 0.00E+00 |
| 2-hydroxybupropfen                      | 9.89  | 19.48  | 2.78  | 6.77   | 197.29 | 2.01  | 2.78   | 0.74    | 0.00E+00 |
| carboxybupropfen                        | 53.02 | 182.09 | 2.51  | 6.10   | 343.96 | 1.36  | 0.68   | 0.56    | 4.77E+01 |
| O-desmethylvenlafaxine                  | 1.18  | 0.77   | 12.65 | 172.26 | 65.89  | 10.63 | 112.06 | 0.93    | 9.53E+00 |
| zolpidem                                | 0.96  | 0.07   | 12.96 | 166.52 | 7.61   | 12.96 | 166.52 | 1.00    | 9.14E+01 |
| warfarin                                | 0.97  | 0.89   | 8.70  | 75.30  | 92.00  | 8.22  | 66.44  | 0.94    | 0.00E+00 |
| 3b-hydroxy-5-cholenic acid              | 1.14  | 0.65   | -0.27 | 0.12   | 57.27  | 0.11  | -0.34  | 0.91    | 1.16E+01 |
| guaiaicol sulfate                       | 1.22  | 0.93   | -0.33 | 1.50   | 76.29  | 0.00  | -0.12  | 0.87    | 0.00E+00 |
| 2-aminooctanoate                        | 1.11  | 0.64   | -0.41 | 0.69   | 58.06  | 0.00  | -0.12  | 0.94    | 0.00E+00 |
| furosemide                              | 1.19  | 0.32   | 9.51  | 91.74  | 86.92  | 9.20  | 83.56  | 0.91    | 0.00E+00 |
| gamma-CEHC glucuronide*                 | 1.24  | 1.05   | -0.19 | 0.21   | 24.75  | 0.07  | -0.28  | 0.83    | 0.00E+00 |
| dimethyl sulfone                        | 2.46  | 8.52   | 0.78  | 2.67   | 346.20 | 0.03  | -0.19  | 0.44    | 0.00E+00 |
| N-acetyl-1-methylhistidine*             | 1.25  | 0.90   | 0.04  | -1.34  | 72.02  | 0.53  | -0.53  | 0.90    | 1.21E+01 |
| indolin-2-one                           | 1.11  | 0.51   | 0.42  | -1.30  | 46.23  | 0.76  | -0.38  | 0.95    | 2.20E+01 |
| 2,8-quinolinediol sulfate               | 1.59  | 1.64   | 2.31  | 4.70   | 103.00 | 1.69  | 1.63   | 0.82    | 1.78E+01 |
| 2-aminophenol sulfate                   | 1.82  | 2.16   | -0.15 | -0.30  | 119.15 | 0.00  | -0.12  | 0.86    | 0.00E+00 |
| 3-acetylphenol sulfate                  | 1.56  | 1.75   | 0.43  | -0.69  | 112.19 | 0.42  | -0.55  | 0.80    | 1.07E+01 |
| sphingomyelin (d18:1/14:0, d16:1/16:0)* | 1.00  | 0.26   | -0.31 | -0.07  | 25.47  | 0.00  | -0.12  | 0.99    | 0.00E+00 |
| sphingomyelin (d18:2/16:0, d18:1/16:1)* | 1.01  | 0.19   | -0.17 | -0.10  | 18.54  | 0.00  | -0.12  | 1.00    | 0.00E+00 |
| 3-hydroxyadipate                        | 1.22  | 0.84   | -0.51 | 0.12   | 69.12  | 0.19  | -0.44  | 0.87    | 0.00E+00 |
| 3-hydroxycotinine glucuronide           | 1.26  | 1.15   | 2.33  | 4.16   | 91.79  | 2.20  | 3.59   | 0.84    | 0.00E+00 |
| 6-oxopiperidine-2-carboxylate           | 1.11  | 0.50   | 0.42  | 1.06   | 45.63  | 0.00  | -0.12  | 0.89    | 2.71E+01 |
| 5-allylcysteine                         | 1.81  | 2.75   | -0.17 | -0.92  | 152.02 | 0.28  | -0.51  | 0.74    | 9.33E-08 |
| allopurinol                             | 1.08  | 0.11   | 14.49 | 218.61 | 10.07  | 13.03 | 168.78 | 1.00    | 6.18E+00 |
| N-delta-acetylornithine                 | 1.15  | 0.86   | 0.17  | 0.45   | 74.72  | 0.00  | -0.12  | 0.85    | 0.00E+00 |
| acisoga                                 | 1.08  | 0.47   | -0.36 | 0.06   | 43.57  | 0.01  | -0.13  | 0.98    | 3.91E+00 |
| 2-aminoheptanoate                       | 1.09  | 0.43   | -0.70 | 3.85   | 39.93  | 0.01  | -0.13  | 0.95    | 0.00E+00 |
| 1-eicosapentaenyl-GPE (20:5)*           | 1.19  | 0.93   | 0.06  | 0.38   | 78.42  | 0.00  | -0.12  | 0.86    | 0.00E+00 |
| N-formylanthranilic acid                | 1.36  | 1.88   | 1.49  | 6.21   | 138.64 | 0.01  | -0.13  | 0.55    | 0.00E+00 |
| N2,N5-diacetylornithine                 | 1.14  | 0.79   | 0.54  | 0.82   | 69.19  | 0.00  | -0.12  | 0.82    | 0.00E+00 |
| 1H-indole-7-acetic acid                 | 1.14  | 0.76   | -0.73 | -0.08  | 67.12  | 0.19  | -0.44  | 0.89    | 1.35E+01 |
| 3-methoxytyramine sulfate               | 1.08  | 0.41   | -0.38 | -0.13  | 38.28  | 0.16  | -0.41  | 0.96    | 7.48E-01 |
| methionine sulfone                      | 1.15  | 0.90   | 0.70  | 2.09   | 78.66  | 0.00  | -0.12  | 0.76    | 0.00E+00 |
| cyclo(ala-pro)                          | 1.19  | 0.66   | -0.11 | -1.22  | 55.12  | 0.40  | -0.55  | 0.95    | 5.11E+00 |
| norbenzoyllecgonine*                    | 1.97  | 2.74   | 9.79  | 113.27 | 139.39 | 6.46  | 40.60  | 0.70    | 7.70E+01 |
| 1-linolenyl-GPC (18:3)*                 | 1.11  | 0.57   | -0.01 | 1.38   | 51.04  | 0.00  | -0.12  | 0.89    | 0.00E+00 |
| 1-eicosapentaenyl-GPC (20:5)*           | 1.21  | 0.95   | 0.27  | 0.50   | 78.78  | 0.00  | -0.12  | 0.85    | 0.00E+00 |
| 1-eicosenyl-GPC (20:1)*                 | 1.00  | 0.36   | -0.14 | 0.06   | 36.40  | 0.00  | -0.12  | 0.98    | 6.73E-01 |
| 1-nonadecanoyl-GPC (19:0)               | 1.01  | 0.52   | -0.38 | -1.27  | 51.83  | 0.39  | -0.55  | 0.97    | 1.51E+01 |
| N-acetylalliin                          | 1.80  | 2.23   | -0.11 | -1.03  | 124.43 | 0.25  | -0.49  | 0.83    | 2.11E-07 |
| 1-dihomo-linolenyl-GPE (20:3n3 or 6)*   | 1.06  | 0.44   | -0.06 | -0.38  | 41.89  | 0.00  | -0.12  | 0.97    | 3.01E+00 |
| 1-(1-enyl-oleoyl)-GPE (P-18:1)*         | 1.18  | 0.70   | 0.32  | 0.86   | 59.67  | 0.00  | -0.12  | 0.87    | 7.06E+00 |
| fructosyllsine                          | 1.05  | 0.29   | -0.59 | 1.03   | 27.12  | 0.01  | -0.13  | 0.99    | 6.58E+00 |
| 1-eicosenyl-GPE (20:1)*                 | 1.09  | 0.59   | -0.69 | 0.35   | 53.72  | 0.11  | -0.35  | 0.93    | 5.26E+00 |
| N-methylpipecolate                      | 1.54  | 1.47   | 0.18  | -0.64  | 95.67  | 0.01  | -0.13  | 0.89 NA |          |
| O-sulfo-L-tyrosine                      | 1.04  | 0.29   | 0.14  | 0.68   | 27.95  | 0.00  | -0.12  | 0.96    | 0.00E+00 |
| ferulic acid 4-sulfate                  | 1.71  | 1.98   | 1.16  | 0.12   | 115.96 | 1.07  | 0.07   | 0.83    | 1.31E+01 |
| 3-(3-hydroxyphenyl)propionate sulfate   | 1.98  | 3.51   | 0.17  | -0.58  | 177.36 | 0.29  | -0.51  | 0.65    | 2.22E+01 |
| 11-ketoetiocholanolone glucuronide      | 1.12  | 0.67   | -0.51 | -0.56  | 59.85  | 0.22  | -0.47  | 0.94    | 8.95E+00 |
| etiocholanolone glucuronide             | 1.19  | 1.12   | -0.42 | 1.26   | 94.24  | 0.01  | -0.15  | 0.76    | 0.00E+00 |
| 17alpha-hydroxypregnanolone glucuronide | 1.30  | 1.10   | -0.44 | -0.35  | 85.02  | 0.15  | -0.39  | 0.89    | 1.56E+01 |
| N-acetyltaurine                         | 1.09  | 0.57   | 0.70  | 2.50   | 52.33  | 0.00  | -0.12  | 0.81    | 4.53E-08 |
| 1-docosapentaenyl-GPC (22:5n6)*         | 1.12  | 0.55   | -0.39 | 0.53   | 49.13  | 0.02  | -0.18  | 0.95    | 1.38E+01 |
| 1-linolenyl-GPE (18:3)*                 | 1.15  | 0.87   | -0.18 | 0.95   | 75.88  | 0.02  | -0.18  | 0.80    | 7.19E-01 |
| 1-oleoyl-GPG (18:1)*                    | 1.11  | 0.60   | 0.28  | -1.56  | 54.05  | 0.80  | -0.33  | 0.90    | 2.27E+01 |
| 1-palmitoyl-GPG (16:0)*                 | 1.07  | 0.39   | -0.55 | 0.44   | 36.89  | 0.11  | -0.34  | 0.96    | 5.84E+00 |
| N-linoleoyltaurine*                     | 1.27  | 1.02   | -0.08 | -0.94  | 79.84  | 0.41  | -0.55  | 0.79    | 1.40E+01 |
| N-acetyl-5-allyl-L-cysteine             | 1.55  | 1.64   | 0.83  | -0.59  | 105.68 | 0.80  | -0.33  | 0.84    | 1.99E+01 |
| 9-hydroxystearate                       | 1.34  | 1.04   | -0.36 | 0.17   | 77.56  | 0.12  | -0.36  | 0.86    | 0.00E+00 |
| 3-methylglutaryl carnitine (2)          | 1.24  | 1.02   | -0.79 | -0.04  | 82.13  | 0.24  | -0.49  | 0.84    | 5.53E+00 |
| methyl glucopyranoside (alpha + beta)   | 1.40  | 1.46   | -0.18 | 0.50   | 104.62 | 0.08  | -0.29  | 0.79    | 0.00E+00 |
| 2-keto-3-deoxy-gluconate                | 1.08  | 0.44   | -1.04 | 4.62   | 40.99  | 0.02  | -0.16  | 0.92    | 0.00E+00 |
| alpha-CEHC sulfate                      | 2.17  | 4.15   | 0.97  | 0.08   | 191.33 | 0.79  | -0.34  | 0.66    | 1.69E+01 |
| alpha-CMBHC glucuronide                 | 1.37  | 1.40   | 0.11  | -0.91  | 102.54 | 0.41  | -0.55  | 0.79    | 8.36E+00 |
| sphingomyelin (d18:2/14:0, d18:1/14:1)* | 1.07  | 0.45   | -0.05 | -0.31  | 41.90  | 0.00  | -0.12  | 0.97    | 0.00E+00 |
| sphingomyelin (d18:1/24:1, d18:2/24:0)* | 1.04  | 0.23   | 0.17  | -0.41  | 22.50  | 0.00  | -0.12  | 0.98    | 2.30E+00 |

Supplementary Table 1: Distribution of raw and transformed metabolites, the correlation between raw and transformed metabolite values, and coefficient of variation of raw metabolites

|                                                             |       |       |       |        |        |       |        |         |          |
|-------------------------------------------------------------|-------|-------|-------|--------|--------|-------|--------|---------|----------|
| octadecenediacylglycerol (C18:1-DC)*                        | 1.14  | 0.64  | 0.03  | 0.04   | 56.52  | 0.00  | -0.12  | 0.93    | 0.00E+00 |
| octadecenediacylglycerol (C18-DC)*                          | 1.08  | 0.52  | -0.24 | 0.22   | 48.30  | 0.00  | -0.12  | 0.95    | 0.00E+00 |
| N,O-didesmethylvenlafaxine glucuronide                      | 0.62  | 0.45  | 11.23 | 127.67 | 72.65  | 10.58 | 110.58 | 0.99    | 7.83E+01 |
| 5alpha-androstan-3alpha,17beta-diol monosulfate (2)         | 2.95  | 4.81  | -0.13 | -0.38  | 163.06 | 0.16  | -0.41  | 0.77    | 1.96E+01 |
| myristoleoylcarnitine (C14:1)*                              | 1.19  | 0.84  | 0.15  | 0.36   | 70.44  | 0.00  | -0.12  | 0.85    | 0.00E+00 |
| N-formylphenylalanine                                       | 1.12  | 0.78  | 1.16  | 3.66   | 69.58  | 0.01  | -0.15  | 0.74    | 8.20E+00 |
| cyclo(pro-val)                                              | 1.23  | 0.82  | -0.57 | 1.36   | 66.98  | 0.02  | -0.18  | 0.92    | 0.00E+00 |
| 4-hydroxychlorothalonil                                     | 1.08  | 0.49  | -0.72 | 1.52   | 45.60  | 0.00  | -0.12  | 0.98    | 0.00E+00 |
| isoeugenol sulfate                                          | 2.06  | 3.33  | 0.96  | -0.06  | 161.65 | 0.78  | -0.35  | 0.70    | 2.85E+01 |
| tyramine O-sulfate                                          | 1.94  | 3.33  | 0.40  | 0.29   | 172.04 | 0.14  | -0.39  | 0.66    | 0.00E+00 |
| 3-hydroxypyridine sulfate                                   | 2.21  | 4.62  | 0.12  | 0.39   | 209.11 | 0.00  | -0.12  | 0.65    | 0.00E+00 |
| 4-methylguaiacol sulfate                                    | 1.77  | 2.60  | 0.02  | -0.23  | 146.87 | 0.13  | -0.38  | 0.73    | 0.00E+00 |
| maltol sulfate                                              | 1.75  | 2.46  | 2.58  | 6.67   | 141.01 | 1.74  | 1.80   | 0.72 NA |          |
| phenylacetylcarnitine                                       | 1.35  | 1.07  | -0.31 | -0.96  | 78.94  | 0.34  | -0.53  | 0.89    | 8.41E+00 |
| arabonate/xylonate                                          | 1.07  | 0.44  | 0.34  | 0.48   | 41.48  | 0.00  | -0.12  | 0.92    | 0.00E+00 |
| methyl-4-hydroxybenzoate sulfate                            | 3.71  | 7.16  | -0.13 | -0.87  | 193.04 | 0.00  | -0.12  | 0.73    | 0.00E+00 |
| 1-dihomo-linolenylglycerol (20:3)                           | 1.20  | 0.72  | -0.59 | 0.14   | 60.37  | 0.14  | -0.39  | 0.93    | 3.18E+01 |
| vanillic alcohol sulfate                                    | 2.09  | 2.61  | 1.66  | 1.88   | 125.31 | 1.07  | 0.07   | 0.81    | 1.77E+01 |
| 4-vinylguaiacol sulfate                                     | 2.62  | 4.12  | 0.86  | -0.23  | 157.79 | 0.50  | -0.54  | 0.75    | 4.43E+01 |
| vanillic acid                                               | 1.19  | 0.97  | 0.90  | 4.74   | 81.50  | 0.02  | -0.16  | 0.66    | 3.70E+00 |
| eugenol sulfate                                             | 2.87  | 9.70  | 0.12  | -0.14  | 338.98 | 0.22  | -0.47  | 0.46    | 7.02E-06 |
| pregnanolone/allopregnanolone sulfate                       | 3.79  | 19.35 | 1.60  | 2.79   | 511.17 | 1.20  | 0.33   | 0.35    | 1.39E-05 |
| 2-methoxyresorcinol sulfate                                 | 3.60  | 9.67  | 1.33  | 0.88   | 269.07 | 0.96  | -0.12  | 0.57    | 0.00E+00 |
| 2-acetamidophenol sulfate                                   | 1.91  | 2.38  | -0.08 | -0.99  | 124.70 | 0.30  | -0.52  | 0.83    | 9.14E+00 |
| p-cresol glucuronide*                                       | 1.51  | 1.59  | -0.69 | 0.47   | 105.45 | 0.02  | -0.18  | 0.88    | 0.00E+00 |
| acesulfame                                                  | 5.75  | 14.45 | 0.93  | -0.60  | 251.70 | 0.95  | -0.14  | 0.62    | 2.72E+01 |
| valsartan                                                   | 1.04  | 0.83  | 12.60 | 163.06 | 79.76  | 10.63 | 112.06 | 1.00    | 4.67E+01 |
| 6-hydroxyindole sulfate                                     | 1.13  | 0.64  | -0.53 | 0.70   | 57.03  | 0.00  | -0.12  | 0.95    | 0.00E+00 |
| 4-methoxyphenol sulfate                                     | 1.55  | 1.87  | -0.31 | 0.40   | 120.67 | 0.12  | -0.36  | 0.77    | 6.67E+00 |
| 2,4-dichlorophenol sulfate                                  | 3.53  | 7.59  | 6.42  | 47.87  | 215.17 | 4.49  | 18.90  | 0.66    | 0.00E+00 |
| propyl 4-hydroxybenzoate sulfate                            | 3.13  | 6.40  | 0.44  | -1.15  | 204.77 | 0.65  | -0.47  | 0.70    | 0.00E+00 |
| ethylparaben sulfate                                        | 10.81 | 39.93 | 0.47  | -0.44  | 370.00 | 0.33  | -0.53  | 0.51    | 3.80E+01 |
| umbelliferone sulfate                                       | 2.84  | 4.82  | 0.23  | -0.84  | 170.10 | 0.30  | -0.52  | 0.73    | 0.00E+00 |
| sphingomyelin (d18:1/20:0, d16:1/22:0)*                     | 1.01  | 0.22  | -0.48 | 0.99   | 21.51  | 0.00  | -0.12  | 1.00    | 0.00E+00 |
| sphingomyelin (d18:1/20:1, d18:2/20:0)*                     | 1.01  | 0.25  | -0.61 | 0.85   | 25.01  | 0.00  | -0.12  | 1.00    | 0.00E+00 |
| sphingomyelin (d18:1/20:2, d18:2/20:1, d16:1/22:2)*         | 1.06  | 0.40  | -0.29 | 0.05   | 37.40  | 0.00  | -0.12  | 0.98    | 0.00E+00 |
| behenoyl sphingomyelin (d18:1/22:0)*                        | 1.04  | 0.31  | -0.02 | -0.66  | 30.26  | 0.00  | -0.12  | 0.98    | 2.54E+00 |
| sphingomyelin (d18:1/22:1, d18:2/22:0, d16:1/24:1)*         | 1.01  | 0.20  | -0.35 | 0.32   | 19.72  | 0.00  | -0.12  | 1.00    | 0.00E+00 |
| sphingomyelin (d18:1/22:2, d18:2/22:1, d16:1/24:2)*         | 1.04  | 0.31  | -0.08 | -0.25  | 29.44  | 0.00  | -0.12  | 0.98    | 0.00E+00 |
| lignoceroyl sphingomyelin (d18:1/24:0)                      | 1.01  | 0.23  | -0.37 | 0.61   | 22.76  | 0.00  | -0.12  | 0.99    | 0.00E+00 |
| sphingomyelin (d17:1/16:0, d18:1/15:0, d16:1/17:0)*         | 1.03  | 0.30  | -0.31 | 0.17   | 29.12  | 0.00  | -0.12  | 0.99    | 0.00E+00 |
| dopamine 3-O-sulfate                                        | 1.26  | 1.14  | 1.12  | 2.45   | 90.56  | 0.00  | -0.12  | 0.70    | 7.11E-08 |
| 3-hydroxyhexanoate                                          | 1.11  | 0.54  | 0.11  | 0.22   | 49.09  | 0.00  | -0.12  | 0.93    | 0.00E+00 |
| N-carbamoylalanine                                          | 1.16  | 0.74  | -0.52 | -0.41  | 63.74  | 0.28  | -0.51  | 0.88    | 4.98E+00 |
| 3beta-hydroxy-5-cholestenolate                              | 1.09  | 0.40  | -0.07 | 0.30   | 36.88  | 0.00  | -0.12  | 0.97    | 3.89E+00 |
| 1,2,3-benzenetriol sulfate (2)                              | 2.09  | 3.44  | 1.95  | 3.08   | 165.00 | 1.49  | 1.03   | 0.72    | 1.09E+02 |
| 3-methoxycatechol sulfate (1)                               | 3.12  | 5.07  | 0.04  | -0.53  | 162.80 | 0.02  | -0.16  | 0.78    | 0.00E+00 |
| 3-methoxycatechol sulfate (2)                               | 1.26  | 0.98  | -0.39 | -0.39  | 77.94  | 0.19  | -0.44  | 0.88    | 1.43E+01 |
| N-acetylkynurenine (2)                                      | 1.44  | 1.51  | -0.07 | 0.04   | 104.88 | 0.11  | -0.34  | 0.77    | 1.67E+01 |
| C-glycosyltryptophan                                        | 1.02  | 0.22  | 0.14  | 1.18   | 21.61  | 0.00  | -0.12  | 0.97    | 0.00E+00 |
| tramadol                                                    | 1.00  | 1.39  | 18.41 | 338.02 | 139.04 | 18.41 | 338.02 | 1.00    | 4.16E+01 |
| O-desmethyltramadol                                         | 1.00  | 1.38  | 18.41 | 338.02 | 137.97 | 18.41 | 338.02 | 1.00    | 7.36E+01 |
| O-desmethyltramadol glucuronide                             | 1.00  | 1.34  | 18.41 | 338.02 | 133.72 | 18.41 | 338.02 | 1.00    | 3.61E+01 |
| arabitol/xylitol                                            | 1.04  | 0.30  | 0.48  | 1.15   | 29.24  | 0.00  | -0.12  | 0.93    | 0.00E+00 |
| N-acetylglucosamine/N-acetylgalactosamine                   | 1.06  | 0.29  | -0.65 | 1.35   | 27.07  | 0.05  | -0.24  | 0.98    | 0.00E+00 |
| citrate/glutamate                                           | 2.24  | 4.93  | 2.02  | 4.54   | 220.50 | 0.00  | -0.12  | 0.56    | 0.00E+00 |
| adipoylcarnitine (C6-DC)                                    | 1.18  | 0.63  | -0.03 | -0.83  | 53.23  | 0.30  | -0.52  | 0.93    | 8.83E+00 |
| nonanoylcarnitine (C9)                                      | 1.30  | 1.56  | 0.41  | 2.37   | 119.98 | 0.06  | -0.27  | 0.64    | 0.00E+00 |
| glycochenodeoxycholate 3-sulfate                            | 1.51  | 1.99  | -0.88 | 0.28   | 132.11 | 0.20  | -0.45  | 0.73    | 0.00E+00 |
| glycodeoxycholate 3-sulfate                                 | 1.36  | 1.29  | -0.66 | 0.28   | 95.35  | 0.13  | -0.37  | 0.84    | 0.00E+00 |
| taurodeoxycholic acid 3-sulfate                             | 1.46  | 1.65  | -0.29 | -0.75  | 113.59 | 0.29  | -0.51  | 0.80    | 0.00E+00 |
| trans-3,4-methyleneheptanoate                               | 1.17  | 0.76  | -0.16 | -1.43  | 65.08  | 0.49  | -0.54  | 0.94 NA |          |
| phenol glucuronide                                          | 1.77  | 2.57  | 0.64  | 0.01   | 145.19 | 0.36  | -0.54  | 0.70    | 0.00E+00 |
| linoleoyl ethanolamide                                      | 1.35  | 1.11  | -0.33 | 0.13   | 82.26  | 0.13  | -0.38  | 0.79    | 0.00E+00 |
| 1,2-dilinoeloyl-GPC (18:2/18:2)                             | 1.02  | 0.31  | -0.61 | 0.52   | 30.23  | 0.00  | -0.12  | 0.99    | 2.06E+00 |
| 1-stearoyl-2-oleoyl-GPC (18:0/18:1)                         | 1.04  | 0.25  | 0.27  | 0.27   | 23.64  | 0.00  | -0.12  | 0.97    | 1.36E+00 |
| 1-palmitoyl-2-arachidonoyl-GPC (16:0/20:4n6)                | 1.00  | 0.16  | -0.24 | 0.31   | 15.81  | 0.00  | -0.12  | 0.99    | 0.00E+00 |
| 1-palmitoyl-2-docosahexaenoyl-GPC (16:0/22:6)               | 1.02  | 0.25  | 0.01  | -0.06  | 24.30  | 0.00  | -0.12  | 0.98    | 0.00E+00 |
| 1-stearoyl-2-docosahexaenoyl-GPC (18:0/22:6)                | 1.04  | 0.34  | -0.27 | 0.88   | 32.98  | 0.00  | -0.12  | 0.98    | 0.00E+00 |
| 1-(1-enyl-stearoyl)-2-oleoyl-GPC (P-18:0/18:1)              | 1.03  | 0.38  | -0.08 | -0.34  | 37.51  | 0.00  | -0.12  | 0.98    | 2.50E+00 |
| 1-(1-enyl-stearoyl)-2-arachidonoyl-GPC (P-18:0/20:4)        | 1.07  | 0.39  | -0.18 | 0.22   | 36.67  | 0.00  | -0.12  | 0.98    | 0.00E+00 |
| 1-(1-enyl-stearoyl)-2-oleoyl-GPE (P-18:0/18:1)              | 1.06  | 0.39  | 0.07  | -0.01  | 36.52  | 0.00  | -0.12  | 0.96    | 0.00E+00 |
| sphingomyelin (d18:1/17:0, d17:1/18:0, d19:1/16:0)          | 1.03  | 0.29  | -0.31 | 0.36   | 27.85  | 0.00  | -0.12  | 0.99    | 0.00E+00 |
| 1-palmitoyl-2-stearoyl-GPC (16:0/18:0)                      | 1.03  | 0.19  | -0.08 | -0.26  | 19.02  | 0.00  | -0.12  | 0.99    | 0.00E+00 |
| 2-hydroxybutyrate/2-hydroxyisobutyrate                      | 1.12  | 0.48  | -0.01 | 0.38   | 43.17  | 0.00  | -0.12  | 0.93    | 0.00E+00 |
| oleate/vaccenate (18:1)                                     | 1.18  | 0.60  | -0.74 | 0.57   | 50.72  | 0.00  | -0.12  | 0.98    | 1.88E+00 |
| isoleucylleucine/leucylisoleucine                           | 1.09  | 0.38  | -0.73 | 0.43   | 34.84  | 0.15  | -0.40  | 0.95    | 4.67E+00 |
| aripiprazole                                                | 1.00  | 0.68  | 13.60 | 188.66 | 68.04  | 13.03 | 168.78 | 1.00    | 7.18E+01 |
| leucylphenylalanine/isoleucylphenylalanine                  | 15.86 | 46.02 | 1.83  | 3.03   | 290.66 | 0.24  | -0.48  | 0.61    |          |
| 1-palmitoleoylglycerol (16:1)*                              | 1.25  | 1.18  | -0.32 | -0.81  | 94.35  | 0.35  | -0.54  | 0.80    | 1.70E+01 |
| palmitoyl dihydroxyphenylalanine (d18:0/16:0)*              | 1.02  | 0.24  | -0.12 | 0.19   | 23.48  | 0.00  | -0.12  | 0.99    | 0.00E+00 |
| tricosanoyl sphingomyelin (d18:1/23:0)*                     | 0.99  | 0.24  | -0.74 | 1.37   | 24.04  | 0.00  | -0.12  | 1.00    | 1.31E-08 |
| sphingomyelin (d18:2/23:0, d18:1/23:1, d17:1/24:1)*         | 1.00  | 0.27  | -0.55 | 0.72   | 27.31  | 0.00  | -0.12  | 1.00    | 3.19E+00 |
| sphingomyelin (d18:2/24:1, d18:1/24:2)*                     | 1.02  | 0.20  | -0.05 | -0.25  | 19.65  | 0.00  | -0.12  | 0.99    | 0.00E+00 |
| diclofenac                                                  | 1.06  | 0.27  | 10.67 | 113.15 | 25.34  | 10.63 | 112.06 | 0.92    | 0.00E+00 |
| 1-stearoyl-2-linoleoyl-GPE (18:0/18:2)*                     | 1.10  | 0.49  | 0.18  | -0.34  | 45.18  | 0.00  | -0.12  | 0.95    | 0.00E+00 |
| 1-stearoyl-2-arachidonoyl-GPE (18:0/20:4)                   | 1.06  | 0.37  | -0.21 | 0.31   | 35.28  | 0.00  | -0.12  | 0.98    | 0.00E+00 |
| 1-stearoyl-2-linoleoyl-GPC (18:0/18:2)*                     | 1.00  | 0.15  | -0.24 | -0.09  | 14.98  | 0.00  | -0.12  | 1.00    | 3.51E-01 |
| 1-palmitoyl-2-palmitoleoyl-GPC (16:0/16:1)*                 | 1.18  | 0.72  | 0.39  | 0.51   | 61.56  | 0.00  | -0.12  | 0.87    | 1.21E+00 |
| 1-palmitoyl-2-eicosapentaenoyl-GPC (16:0/20:5)*             | 1.07  | 0.51  | 0.02  | 0.78   | 47.26  | 0.00  | -0.12  | 0.92    | 0.00E+00 |
| 1-palmitoyl-2-arachidonoyl-GPE (16:0/20:4)*                 | 1.06  | 0.43  | -0.16 | 0.18   | 40.83  | 0.00  | -0.12  | 0.97    | 0.00E+00 |
| 1-palmitoyl-2-docosahexaenoyl-GPE (16:0/22:6)*              | 1.11  | 0.65  | -0.38 | 1.16   | 58.25  | 0.00  | -0.12  | 0.93    | 3.31E+00 |
| 1-stearoyl-2-docosahexaenoyl-GPE (18:0/22:6)*               | 1.11  | 0.60  | -0.58 | 1.81   | 54.42  | 0.02  | -0.16  | 0.91    | 0.00E+00 |
| 1-palmitoyl-2-arachidonoyl-GPI (16:0/20:4)*                 | 1.10  | 0.54  | -0.16 | 0.21   | 48.72  | 0.00  | -0.12  | 0.95    | 0.00E+00 |
| 1-stearoyl-2-linoleoyl-GPI (18:0/18:2)                      | 1.03  | 0.35  | -0.29 | -0.17  | 34.49  | 0.00  | -0.12  | 0.99    | 0.00E+00 |
| 1-palmitoyl-2-palmitoleoyl-GPE (16:0/16:1)*                 | 1.42  | 1.33  | 1.46  | 1.16   | 93.76  | 1.20  | 0.33   | 0.82    | 0.00E+00 |
| gamma-tocopherol/beta-tocopherol                            | 1.23  | 0.81  | -2.93 | 12.81  | 66.36  | 0.02  | -0.18  | 0.95    | 2.22E-06 |
| 1-(1-enyl-stearoyl)-2-arachidonoyl-GPE (P-18:0/20:4)*       | 1.08  | 0.41  | -0.06 | -0.30  | 37.98  | 0.00  | -0.12  | 0.98    | 1.83E+00 |
| 1-(1-enyl-palmitoyl)-2-docosahexaenoyl-GPE (P-16:0/22:6)*   | 1.04  | 0.37  | -0.61 | 1.27   | 35.32  | 0.00  | -0.12  | 0.98    | 0.00E+00 |
| 1-(1-enyl-palmitoyl)-2-arachidonoyl-GPE (P-16:0/20:4)*      | 1.06  | 0.41  | 0.05  | 0.04   | 38.39  | 0.00  | -0.12  | 0.96    | 0.00E+00 |
| 1-(1-enyl-oleoyl)-2-linoleoyl-GPE (P-18:1/18:2)*            | 1.21  | 0.71  | -0.26 | 0.25   | 58.60  | 0.04  | -0.23  | 0.93    | 1.11E+01 |
| 1-(1-enyl-stearoyl)-2-docosahexaenoyl-GPE (P-18:0/22:6)*    | 1.04  | 0.43  | -0.34 | 0.32   | 41.23  | 0.00  | -0.12  | 0.98    | 0.00E+00 |
| 1-(1-enyl-palmitoyl)-2-oleoyl-GPE (P-16:0/18:1)*            | 1.03  | 0.29  | 0.02  | 0.34   | 27.59  | 0.00  | -0.12  | 0.97    | 0.00E+00 |
| 1-(1-enyl-palmitoyl)-2-dihomo-linolenoyl-GPC (P-16:0/20:3)* | 1.06  | 0.36  | -0.50 | 0.02   | 34.06  | 0.11  | -0.35  | 0.98    | 7.12E+00 |
| 1-(1-enyl-palmitoyl)-2-oleoyl-GPC (P-16:0/18:1)*            | 1.04  | 0.31  | 0.02  | -0.54  | 30.43  | 0.00  | -0.12  | 0.98    | 0.00E+00 |
| 1-(1-enyl-palmitoyl)-2-docosahexaenoyl-GPC (P-16:0/22:6)*   | 1.05  | 0.39  | 0.11  | -0.40  | 37.38  | 0.00  | -0.12  | 0.97    | 7.73E-08 |
| 1-(1-enyl-palmitoyl)-2-linoleoyl-GPC (P-16:0/18:2)*         | 1.03  | 0.30  | -0.26 | -0.06  | 29.07  | 0.00  | -0.12  | 0.99    | 0.00E+00 |

Supplementary Table 1: Distribution of raw and transformed metabolites, the correlation between raw and transformed metabolite values, and coefficient of variation of raw metabolites

|                                                            |      |       |       |        |        |       |        |      |          |
|------------------------------------------------------------|------|-------|-------|--------|--------|-------|--------|------|----------|
| 1-(1-enyl-palmitoyl)-2-arachidonoyl-GPC (P-16:0/20:4)*     | 1.04 | 0.28  | 0.00  | 0.10   | 27.37  | 0.00  | -0.12  | 0.98 | 0.00E+00 |
| 1-(1-enyl-stearoyl)-2-docosahexaenoyl-GPC (P-18:0/22:6)*   | 1.10 | 0.50  | 0.01  | -0.16  | 45.02  | 0.00  | -0.12  | 0.95 | 0.00E+00 |
| 1-stearoyl-2-arachidonoyl-GPC (O-18:0/20:4)*               | 1.03 | 0.29  | -0.67 | 1.14   | 28.05  | 0.00  | -0.12  | 0.99 | 0.00E+00 |
| 1-palmitoyl-2-oleoyl-GPC (O-16:0/18:1)*                    | 1.02 | 0.27  | -0.08 | -0.66  | 26.26  | 0.00  | -0.12  | 0.99 | 0.00E+00 |
| 1-palmitoyl-2-arachidonoyl-GPC (O-16:0/20:4)*              | 1.06 | 0.33  | 0.12  | 0.89   | 31.28  | 0.00  | -0.12  | 0.94 | 0.00E+00 |
| sphingomyelin (d18:1/21:0, d17:1/22:0, d16:1/23:0)*        | 1.00 | 0.31  | -0.86 | 1.90   | 30.68  | 0.00  | -0.12  | 1.00 | 4.06E+00 |
| behenoyl dihydrosphingomyelin (d18:0/22:0)*                | 1.08 | 0.44  | -0.05 | -0.09  | 40.64  | 0.00  | -0.12  | 0.97 | 0.00E+00 |
| sphingomyelin (d18:0/18:0, d19:0/17:0)*                    | 1.12 | 0.55  | 0.06  | -0.08  | 49.47  | 0.00  | -0.12  | 0.94 | 0.00E+00 |
| N-palmitoyl-sphinganine (d18:0/16:0)                       | 1.06 | 0.38  | 0.47  | 1.00   | 36.14  | 0.00  | -0.12  | 0.91 | 5.60E+00 |
| lactosyl-N-palmitoyl-sphingosine (d18:1/16:0)              | 1.02 | 0.23  | -0.11 | -0.14  | 22.77  | 0.00  | -0.12  | 0.99 | 0.00E+00 |
| cetirizine                                                 | 1.39 | 1.57  | 3.01  | 7.63   | 113.09 | 2.94  | 7.35   | 0.83 | 0.00E+00 |
| 1-pentadecanoyl-2-linoleoyl-GPC (15:0/18:2)*               | 1.04 | 0.36  | -0.45 | 0.18   | 34.35  | 0.00  | -0.12  | 0.99 | 0.00E+00 |
| 1-margaroyl-2-oleoyl-GPC (17:0/18:1)*                      | 0.99 | 0.27  | -0.13 | -0.05  | 26.99  | 0.00  | -0.12  | 0.99 | 0.00E+00 |
| 1-margaroyl-2-linoleoyl-GPC (17:0/18:2)*                   | 1.00 | 0.24  | -0.57 | 0.65   | 23.60  | 0.00  | -0.12  | 1.00 | 0.00E+00 |
| myristoyl dihydrosphingomyelin (d18:0/14:0)*               | 1.03 | 0.37  | -0.05 | 0.22   | 35.82  | 0.00  | -0.12  | 0.96 | 0.00E+00 |
| 5-hydroxyindole sulfate                                    | 1.46 | 3.03  | 0.14  | 1.50   | 208.03 | 0.14  | -0.39  | 0.44 | 0.00E+00 |
| 7-hydroxyindole sulfate                                    | 1.47 | 1.45  | 1.07  | 0.61   | 98.97  | 0.72  | -0.41  | 0.77 | 2.70E+01 |
| phenylacetylglutamate                                      | 1.28 | 1.06  | -0.19 | -1.09  | 82.75  | 0.36  | -0.54  | 0.86 | 1.46E+01 |
| 1-stearoyl-2-dihomo-linolenoyl-GPC (18:0/20:3n3 or 6)*     | 1.02 | 0.26  | -0.31 | -0.03  | 25.65  | 0.00  | -0.12  | 0.99 | 0.00E+00 |
| palmitoyl-linoleoyl-glycerol (16:0/18:2) [1]*              | 1.15 | 0.66  | -0.52 | 1.95   | 57.26  | 0.01  | -0.13  | 0.93 |          |
| palmitoyl-linoleoyl-glycerol (16:0/18:2) [2]*              | 1.12 | 0.62  | 0.23  | -0.05  | 55.43  | 0.00  | -0.12  | 0.92 |          |
| 1-palmitoyl-2-oleoyl-GPI (16:0/18:1)*                      | 1.10 | 0.58  | 0.05  | 0.38   | 52.94  | 0.00  | -0.12  | 0.92 | 2.29E+00 |
| 1-stearoyl-2-docosahexaenoyl-GPI (18:0/22:6)*              | 1.15 | 0.65  | 0.11  | -0.04  | 56.28  | 0.00  | -0.12  | 0.93 | 6.01E+00 |
| 1-(1-enyl-palmitoyl)-2-linoleoyl-GPE (P-16:0/18:2)*        | 1.07 | 0.41  | -0.04 | 0.83   | 38.23  | 0.00  | -0.12  | 0.94 | 2.32E+00 |
| 1-oleoyl-2-linoleoyl-GPE (18:1/18:2)*                      | 1.07 | 0.51  | -0.20 | -0.24  | 47.33  | 0.03  | -0.19  | 0.96 | 6.81E+00 |
| 1-pentadecanoyl-2-arachidonoyl-GPC (15:0/20:4)*            | 1.04 | 0.41  | -0.57 | 0.85   | 39.24  | 0.02  | -0.18  | 0.97 | 0.00E+00 |
| 1-pentadecanoyl-2-docosahexaenoyl-GPC (15:0/22:6)*         | 1.09 | 0.61  | -0.13 | 0.66   | 56.51  | 0.01  | -0.15  | 0.92 | 0.00E+00 |
| 1-margaroyl-2-arachidonoyl-GPC (17:0/20:4)*                | 1.07 | 0.43  | -0.58 | 1.11   | 40.48  | 0.00  | -0.12  | 0.98 | 0.00E+00 |
| 1-arachidoyl-2-arachidonoyl-GPC (20:0/20:4)*               | 1.05 | 0.37  | -0.08 | 0.08   | 34.70  | 0.01  | -0.13  | 0.97 | 1.54E+00 |
| 1-oleoyl-2-docosahexaenoyl-GPC (18:1/22:6)*                | 1.04 | 0.32  | -0.15 | 1.12   | 30.46  | 0.00  | -0.12  | 0.97 | 4.45E-08 |
| 1-linoleoyl-2-arachidonoyl-GPC (18:2/20:4n6)*              | 0.99 | 0.25  | -0.62 | 0.68   | 25.17  | 0.00  | -0.12  | 1.00 | 2.60E-08 |
| 1-linoleoyl-2-docosahexaenoyl-GPC (18:2/22:6)*             | 1.04 | 0.39  | -0.01 | 0.43   | 37.09  | 0.00  | -0.12  | 0.96 | 2.18E-07 |
| 1-palmitoyl-2-linoleoyl-GPC (O-16:0/18:2)*                 | 1.07 | 0.42  | 0.10  | 0.44   | 39.35  | 0.00  | -0.12  | 0.94 | 0.00E+00 |
| 1-(1-enyl-stearoyl)-2-linoleoyl-GPC (P-18:0/18:2)*         | 1.03 | 0.36  | -0.12 | -0.15  | 35.46  | 0.00  | -0.12  | 0.97 | 3.54E+00 |
| 1-myristoyl-2-linoleoyl-GPC (14:0/18:2)*                   | 1.04 | 0.37  | -0.30 | 0.04   | 35.80  | 0.00  | -0.12  | 0.98 | 0.00E+00 |
| 1-myristoyl-2-arachidonoyl-GPC (14:0/20:4)*                | 1.08 | 0.50  | -0.49 | 0.65   | 46.75  | 0.00  | -0.12  | 0.97 | 0.00E+00 |
| 1-myristoyl-2-docosahexaenoyl-GPC (14:0/22:6)*             | 1.14 | 0.73  | -0.14 | 1.59   | 63.82  | 0.01  | -0.13  | 0.86 | 0.00E+00 |
| 1-stearoyl-2-docosapentaenoyl-GPC (18:0/22:5n3)*           | 1.04 | 0.37  | -0.14 | -0.06  | 35.35  | 0.00  | -0.12  | 0.97 | 2.14E-07 |
| 1-stearoyl-2-docosapentaenoyl-GPC (18:0/22:5n6)*           | 1.13 | 0.56  | -0.76 | 1.94   | 50.07  | 0.00  | -0.12  | 0.97 | 1.40E-06 |
| 1-palmitoyl-2-adrenoyl-GPC (16:0/22:4)*                    | 1.02 | 0.36  | -0.51 | 0.20   | 35.01  | 0.00  | -0.12  | 0.99 | 0.00E+00 |
| 1-stearoyl-2-adrenoyl-GPC (18:0/22:4)*                     | 1.05 | 0.44  | -0.15 | 0.17   | 42.15  | 0.00  | -0.12  | 0.96 | 0.00E+00 |
| 1-stearoyl-GPC (O-18:0)*                                   | 1.14 | 0.63  | 0.30  | 0.25   | 55.54  | 0.33  | -0.53  | 0.81 | 0.00E+00 |
| 1-myristoyl-2-palmitoleoyl-GPC (14:0/16:1)*                | 1.28 | 1.04  | -0.55 | -0.05  | 81.88  | 0.13  | -0.38  | 0.90 | 9.06E+00 |
| 1-stearoyl-2-meadoyl-GPC (18:0/20:3n9)*                    | 1.10 | 0.45  | -0.28 | -1.34  | 41.12  | 0.47  | -0.54  | 0.96 | 1.38E+01 |
| 1-(1-enyl-palmitoyl)-2-palmitoleoyl-GPC (P-16:0/16:1)*     | 1.05 | 0.31  | 0.16  | -0.18  | 29.51  | 0.00  | -0.12  | 0.97 | 0.00E+00 |
| 1-(1-enyl-palmitoyl)-2-myristoyl-GPC (P-16:0/14:0)*        | 1.09 | 0.42  | -0.38 | 0.04   | 39.11  | 0.08  | -0.29  | 0.97 | 2.81E+00 |
| 1-(1-enyl-palmitoyl)-2-palmitoyl-GPC (P-16:0/16:0)*        | 1.03 | 0.25  | 0.07  | -0.22  | 24.67  | 0.00  | -0.12  | 0.98 | 0.00E+00 |
| phosphatidylcholine (16:0/22:5n3, 18:1/20:4)*              | 0.99 | 0.25  | -0.46 | -0.02  | 25.39  | 0.00  | -0.12  | 1.00 | 7.15E-01 |
| phosphatidylcholine (18:0/20:5, 16:0/22:5n6)*              | 1.13 | 0.56  | -0.18 | -1.62  | 49.37  | 0.60  | -0.50  | 0.91 | 8.26E-01 |
| 1-palmitoyl-2-docosahexaenoyl-GPI (16:0/22:6)*             | 1.20 | 0.80  | -0.21 | -0.07  | 66.82  | 0.11  | -0.35  | 0.89 | NA       |
| 1-stearoyl-2-oleoyl-GPI (18:0/18:1)*                       | 1.08 | 0.54  | -1.68 | 7.04   | 49.64  | 0.02  | -0.18  | 0.95 | 0.00E+00 |
| 1-stearoyl-2-dihomo-linolenoyl-GPI (18:0/20:3n3 or 6)*     | 1.04 | 0.39  | -0.16 | -0.20  | 37.94  | 0.00  | -0.12  | 0.98 | 0.00E+00 |
| 1-stearoyl-GPE (O-18:0)*                                   | 1.21 | 0.77  | 0.41  | -0.26  | 64.08  | 0.48  | -0.54  | 0.80 | 2.73E+01 |
| 1,2-dipalmitoyl-GPE (16:0/16:0)*                           | 1.11 | 0.63  | 0.98  | 0.21   | 56.46  | 0.84  | -0.28  | 0.84 |          |
| 1-palmitoyl-2-stearoyl-GPE (16:0/18:0)*                    | 1.11 | 0.59  | 0.18  | -0.94  | 53.05  | 0.45  | -0.55  | 0.91 |          |
| 1-palmitoyl-2-eicosapentaenoyl-GPE (16:0/20:5)*            | 1.23 | 0.85  | 0.12  | -1.14  | 68.93  | 0.50  | -0.54  | 0.90 | 6.34E+00 |
| 1-stearoyl-2-dihomo-linolenoyl-GPE (18:0/20:3n3 or 6)*     | 1.11 | 0.58  | -0.19 | 0.31   | 52.44  | 0.00  | -0.12  | 0.95 | 0.00E+00 |
| 1,2-dilinoleoyl-GPE (18:2/18:2)*                           | 1.21 | 0.85  | 0.49  | -0.66  | 70.21  | 0.53  | -0.53  | 0.87 | 5.57E+01 |
| 1-oleoyl-2-arachidonoyl-GPE (18:1/20:4)*                   | 1.05 | 0.43  | -0.40 | 0.03   | 40.45  | 0.00  | -0.12  | 0.98 | 1.28E+01 |
| 1-(1-enyl-stearoyl)-2-linoleoyl-GPE (P-18:0/18:2)*         | 1.03 | 0.34  | -0.29 | 0.42   | 33.05  | 0.00  | -0.12  | 0.98 | 0.00E+00 |
| 1-linoleoyl-GPG (18:2)*                                    | 1.10 | 0.45  | -0.39 | 0.13   | 40.93  | 0.06  | -0.27  | 0.97 | 6.11E+00 |
| thiopropine                                                | 1.02 | 0.39  | -1.10 | 2.20   | 38.00  | 0.00  | -0.12  | 0.99 | 5.34E+00 |
| palmitoylcholine                                           | 1.09 | 0.52  | -0.57 | 0.32   | 48.26  | 0.00  | -0.12  | 0.97 | 0.00E+00 |
| trans-3,4-methyleneheptanoylcarnitine                      | 1.09 | 0.65  | -0.85 | -0.22  | 59.67  | 0.23  | -0.48  | 0.94 |          |
| glycocholate glucuronide (1)                               | 1.79 | 2.48  | 0.70  | -0.60  | 139.30 | 0.67  | -0.45  | 0.75 | 8.77E+00 |
| glycochenodeoxycholate glucuronide (1)                     | 1.79 | 3.59  | -0.35 | 0.63   | 200.60 | 0.11  | -0.34  | 0.57 | 0.00E+00 |
| (S)-3-hydroxybutyrylcarnitine                              | 1.27 | 0.85  | -0.59 | -0.09  | 67.17  | 0.20  | -0.45  | 0.91 | 5.27E+00 |
| glycosyl-N-palmitoyl-sphingosine (d18:1/16:0)              | 1.02 | 0.26  | -0.05 | -0.31  | 25.05  | 0.00  | -0.12  | 0.99 | 0.00E+00 |
| catechol glucuronide                                       | 1.56 | 2.04  | 1.71  | 2.85   | 130.96 | 1.02  | -0.03  | 0.71 | 3.17E+01 |
| ascorbic acid 2-sulfate                                    | 1.03 | 0.43  | -0.75 | 2.03   | 41.79  | 0.00  | -0.12  | 0.97 | 0.00E+00 |
| oleoylcholine                                              | 1.11 | 0.57  | -0.58 | 0.28   | 51.57  | 0.00  | -0.12  | 0.97 | 0.00E+00 |
| arachidonoylcholine                                        | 1.11 | 0.60  | -0.30 | 0.01   | 54.07  | 0.00  | -0.12  | 0.96 | 0.00E+00 |
| docosahexaenoylcholine                                     | 1.12 | 0.68  | -0.69 | 0.97   | 60.80  | 0.03  | -0.20  | 0.94 | 0.00E+00 |
| palmitoleoylcholine                                        | 1.10 | 0.66  | 0.36  | -1.25  | 59.89  | 0.70  | -0.43  | 0.91 | 1.71E+01 |
| dihomo-linolenoyl-choline                                  | 1.11 | 0.60  | -0.77 | 1.07   | 54.39  | 0.02  | -0.16  | 0.97 | 4.93E+00 |
| caffeic acid sulfate                                       | 3.30 | 6.09  | 1.49  | 1.47   | 184.94 | 0.89  | -0.22  | 0.72 | 8.79E-06 |
| 1-linoleoyl-2-linolenoyl-GPC (18:2/18:3)*                  | 1.16 | 0.73  | -0.41 | 0.68   | 63.16  | 0.03  | -0.19  | 0.92 | 0.00E+00 |
| 1-palmitoleoyl-2-linolenoyl-GPC (16:1/18:3)*               | 1.09 | 0.54  | -0.57 | -1.17  | 49.97  | 0.42  | -0.55  | 0.93 | 1.40E+01 |
| phosphatidylcholine (14:0/14:0, 16:0/12:0)                 | 1.49 | 1.82  | 0.00  | 0.13   | 122.38 | 0.05  | -0.24  | 0.75 | 0.00E+00 |
| phosphatidylcholine (15:0/18:1, 17:0/16:1, 16:0/17:1)*     | 1.03 | 0.35  | -0.08 | 0.08   | 33.93  | 0.00  | -0.12  | 0.97 | 0.00E+00 |
| 1-oleoyl-2-dihomo-linolenoyl-GPC (18:1/20:2)*              | 1.01 | 0.30  | -1.33 | -0.11  | 30.23  | 0.32  | -0.53  | 0.99 | 1.15E+01 |
| 1-oleoyl-2-docosapentaenoyl-GPC (18:1/22:5n3)*             | 1.03 | 0.52  | -1.41 | 1.43   | 51.14  | 0.11  | -0.35  | 0.99 | 1.53E+00 |
| phosphatidylcholine (18:0/20:2, 20:0/18:2)*                | 1.00 | 0.22  | -0.33 | 0.42   | 22.04  | 0.00  | -0.12  | 0.99 | 0.00E+00 |
| 1-(1-enyl-oleoyl)-2-docosahexaenoyl-GPE (P-18:1/22:6)*     | 1.07 | 0.51  | -0.83 | 0.97   | 48.26  | 0.05  | -0.24  | 0.97 | 0.00E+00 |
| 1-(1-enyl-stearoyl)-2-dihomo-linolenoyl-GPE (P-18:0/20:3)* | 1.06 | 0.44  | -0.11 | -0.03  | 41.52  | 0.00  | -0.12  | 0.97 | 0.00E+00 |
| lisinopril                                                 | 1.02 | 0.55  | 5.22  | 26.37  | 53.89  | 4.82  | 22.02  | 0.98 |          |
| lamotrigine                                                | 1.98 | 1.29  | 16.08 | 270.08 | 65.13  | 13.03 | 168.78 | 1.00 | 2.21E+01 |
| hexadecatrienoate (16:3n3)                                 | 1.41 | 1.24  | 0.40  | -0.97  | 88.49  | 0.60  | -0.50  | 0.81 | 0.00E+00 |
| hexadecadienoate (16:2n6)                                  | 1.28 | 0.84  | -0.43 | 0.36   | 66.14  | 0.00  | -0.12  | 0.92 | 1.01E+01 |
| 1-myristoyl-2-eicosapentaenoyl-GPC (14:0/20:5)*            | 1.21 | 1.07  | -0.40 | 1.66   | 89.01  | 0.03  | -0.19  | 0.79 | 0.00E+00 |
| palmitoleoylcarnitine (C16:1)*                             | 1.12 | 0.70  | 0.33  | 1.28   | 62.83  | 0.00  | -0.12  | 0.83 | 0.00E+00 |
| 4-acetamidobenzoate                                        | 4.37 | 30.97 | 1.78  | 5.52   | 709.54 | 0.99  | -0.08  | 0.28 | 0.00E+00 |
| 4-hydroxyphenylacetylglutamine                             | 1.13 | 0.67  | -0.80 | 1.30   | 59.01  | 0.07  | -0.28  | 0.91 | 1.30E-06 |
| 2'-O-methyluridine                                         | 1.13 | 0.43  | 0.50  | 0.84   | 38.41  | 0.06  | -0.26  | 0.90 | 3.68E+00 |
| gamma-glutamyl-alpha-lysine                                | 1.20 | 0.60  | 0.91  | 2.77   | 50.48  | 0.00  | -0.12  | 0.83 | 8.91E-01 |
| palmitoyl-oleoyl-glycerol (16:0/18:1) [1]*                 | 1.22 | 0.96  | 0.25  | 0.74   | 78.61  | 0.02  | -0.16  | 0.80 |          |
| palmitoyl-oleoyl-glycerol (16:0/18:1) [2]*                 | 1.26 | 0.97  | 0.34  | 0.80   | 77.39  | 0.00  | -0.12  | 0.80 |          |
| oleoyl-oleoyl-glycerol (18:1/18:1) [1]*                    | 1.13 | 0.59  | 0.00  | 0.08   | 52.12  | 0.00  | -0.12  | 0.93 |          |
| oleoyl-oleoyl-glycerol (18:1/18:1) [2]*                    | 1.14 | 0.64  | -0.20 | 0.24   | 56.29  | 0.00  | -0.12  | 0.93 |          |
| linoleoyl-arachidonoyl-glycerol (18:2/20:4) [1]*           | 1.18 | 0.69  | -0.29 | 0.69   | 58.73  | 0.00  | -0.12  | 0.93 |          |
| linoleoyl-arachidonoyl-glycerol (18:2/20:4) [2]*           | 1.15 | 0.90  | -1.21 | 1.19   | 78.17  | 0.09  | -0.31  | 0.88 |          |
| palmitoyl-arachidonoyl-glycerol (16:0/20:4) [1]*           | 1.49 | 1.77  | -0.16 | -0.29  | 119.55 | 0.24  | -0.48  | 0.73 |          |
| palmitoyl-arachidonoyl-glycerol (16:0/20:4) [2]*           | 1.33 | 1.56  | -0.16 | 0.58   | 117.39 | 0.12  | -0.36  | 0.68 |          |
| linoleoyl-linolenoyl-glycerol (18:2/18:3) [1]*             | 1.37 | 1.24  | -0.09 | -1.08  | 90.03  | 0.40  | -0.55  | 0.87 |          |
| linoleoyl-linolenoyl-glycerol (18:2/18:3) [2]*             | 1.20 | 0.91  | -0.13 | 0.31   | 75.82  | 0.00  | -0.12  | 0.89 |          |
| linoleoyl                                                  |      |       |       |        |        |       |        |      |          |

Supplementary Table 1: Distribution of raw and transformed metabolites, the correlation between raw and transformed metabolite values, and coefficient of variation of raw metabolites

|                                                                 |       |       |       |        |        |       |        |      |          |
|-----------------------------------------------------------------|-------|-------|-------|--------|--------|-------|--------|------|----------|
| diacylglycerol (14:0/18:1, 16:0/16:1) [1]*                      | 1.47  | 2.06  | 0.17  | -0.85  | 140.99 | 0.47  | -0.54  | 0.67 |          |
| diacylglycerol (14:0/18:1, 16:0/16:1) [2]*                      | 1.55  | 2.04  | -0.19 | -0.25  | 132.24 | 0.23  | -0.47  | 0.68 |          |
| oleoyl-arachidonoyl-glycerol (18:1/20:4) [1]*                   | 1.14  | 0.66  | 0.12  | 0.71   | 57.63  | 0.00  | -0.12  | 0.89 | 1.33E+01 |
| oleoyl-arachidonoyl-glycerol (18:1/20:4) [2]*                   | 1.13  | 0.68  | 0.04  | 0.70   | 60.30  | 0.02  | -0.16  | 0.87 | 1.01E+01 |
| palmitoyl-linolenoyl-glycerol (16:0/18:3) [2]*                  | 1.33  | 1.30  | 0.21  | -1.40  | 98.24  | 0.64  | -0.47  | 0.81 |          |
| diacylglycerol (16:1/18:2 [2], 16:0/18:3 [1])*                  | 1.33  | 1.03  | -0.34 | 0.01   | 77.35  | 0.01  | -0.13  | 0.93 | 1.11E+01 |
| linoleoyl-linoleoyl-glycerol (18:2/18:2) [1]*                   | 1.35  | 1.18  | 0.05  | -0.13  | 87.20  | 0.00  | -0.12  | 0.87 | 6.83E+00 |
| linoleoyl-linoleoyl-glycerol (18:2/18:2) [2]*                   | 1.12  | 0.67  | -0.91 | 1.01   | 59.74  | 0.07  | -0.28  | 0.96 | 7.16E+00 |
| stearoyl-arachidonoyl-glycerol (18:0/20:4) [1]*                 | 1.10  | 0.45  | 0.10  | 0.26   | 40.73  | 0.00  | -0.12  | 0.95 |          |
| stearoyl-arachidonoyl-glycerol (18:0/20:4) [2]*                 | 1.08  | 0.37  | -1.64 | 3.63   | 34.35  | 0.10  | -0.32  | 0.95 |          |
| perfluorooctanesulfonate (PFOS)                                 | 1.27  | 1.08  | -1.14 | 4.11   | 85.46  | 0.01  | -0.13  | 0.87 | 0.00E+00 |
| 1-palmityl-GPE (O-16:0)*                                        | 1.39  | 1.17  | 0.88  | 0.71   | 84.22  | 0.29  | -0.51  | 0.80 | 1.96E+01 |
| 1-palmityl-2-stearoyl-GPC (O-16:0/18:0)*                        | 1.02  | 0.28  | -0.32 | 0.26   | 27.31  | 0.00  | -0.12  | 0.99 | 4.49E+00 |
| 1-palmityl-2-palmitoyl-GPC (O-16:0/16:0)*                       | 1.03  | 0.26  | -0.16 | -0.30  | 25.00  | 0.00  | -0.12  | 0.99 | 0.00E+00 |
| 1-stearyl-2-docosapentaenoyl-GPC (O-18:0/22:5n3)*               | 0.99  | 0.27  | -0.25 | 0.01   | 26.86  | 0.00  | -0.12  | 0.99 | 0.00E+00 |
| 1-stearyl-2-linoleoyl-GPC (O-18:0/18:2)*                        | 1.05  | 0.34  | -0.08 | -0.08  | 32.84  | 0.00  | -0.12  | 0.98 | 0.00E+00 |
| 1-stearoyl-2-docosapentaenoyl-GPE (18:0/22:5n3)*                | 1.10  | 0.55  | -0.27 | 0.44   | 49.61  | 0.03  | -0.20  | 0.93 | 2.52E+01 |
| 1-stearoyl-2-docosapentaenoyl-GPE (18:0/22:5n6)*                | 1.27  | 1.12  | -0.30 | 0.45   | 88.47  | 0.03  | -0.20  | 0.81 | 6.75E+00 |
| 1-stearoyl-2-adrenoyl-GPE (18:0/22:4)*                          | 1.20  | 0.88  | -0.23 | 0.95   | 73.30  | 0.01  | -0.15  | 0.83 | 1.22E+01 |
| 1-(1-enyl-stearoyl)-2-docosapentaenoyl-GPE (P-18:0/22:5n3)*     | 1.06  | 0.35  | -0.27 | 0.45   | 32.79  | 0.00  | -0.12  | 0.98 | 0.00E+00 |
| N-palmitoyl-sphingadienine (d18:2/16:0)*                        | 1.01  | 0.29  | -0.20 | 0.03   | 28.26  | 0.00  | -0.12  | 0.99 | 3.27E+00 |
| lactosyl-N-nervonoyl-sphingosine (d18:1/24:1)*                  | 1.02  | 0.32  | -0.12 | -0.04  | 31.73  | 0.00  | -0.12  | 0.98 | 0.00E+00 |
| glycosyl-N-behenoyl-sphingosine (d18:1/22:0)*                   | 1.02  | 0.28  | -0.23 | 0.20   | 27.75  | 0.00  | -0.12  | 0.99 |          |
| lactosyl-N-behenoyl-sphingosine (d18:1/22:0)*                   | 1.04  | 0.33  | -1.81 | 6.30   | 31.41  | 0.04  | -0.21  | 0.98 | 8.92E+00 |
| N-behenoyl-sphingadienine (d18:2/22:0)*                         | 1.03  | 0.34  | -0.62 | 2.19   | 33.23  | 0.00  | -0.12  | 0.97 |          |
| glycosyl-N-behenoyl-sphingadienine (d18:2/22:0)*                | 1.03  | 0.35  | -0.66 | 1.11   | 34.65  | 0.00  | -0.12  | 0.99 | 0.00E+00 |
| N-stearoyl-sphingadienine (d18:2/18:0)*                         | 1.06  | 0.40  | -0.47 | 0.65   | 38.40  | 0.00  | -0.12  | 0.98 | 9.30E+00 |
| N-palmitoylserine                                               | 1.06  | 0.40  | -0.52 | -1.40  | 38.27  | 0.48  | -0.54  | 0.97 | 2.82E+01 |
| N-oleoylserine                                                  | 1.05  | 0.40  | -0.26 | -0.13  | 37.98  | 0.06  | -0.26  | 0.97 | 7.04E+00 |
| sphingadienine                                                  | 1.04  | 0.31  | -0.18 | 0.81   | 29.94  | 0.02  | -0.16  | 0.97 | 7.26E+00 |
| palmitoleyl-arachidonoyl-glycerol (16:1/20:4) [2]*              | 1.23  | 1.01  | -1.19 | 2.47   | 82.00  | 0.07  | -0.28  | 0.88 |          |
| myristoyl-linoleoyl-glycerol (14:0/18:2) [2]*                   | 1.35  | 1.22  | -0.26 | -0.28  | 90.79  | 0.11  | -0.35  | 0.87 | 3.13E+01 |
| phosphatidylethanolamine (P-18:1/20:4, P-16:0/22:5n3)*          | 1.07  | 0.38  | 0.16  | 0.03   | 35.50  | 0.00  | -0.12  | 0.96 | 0.00E+00 |
| 1-stearoyl-2-(hydroxylinooleoyl)-GPC (18:0/18:2(OH))*           | 10.10 | 33.27 | 2.19  | 5.14   | 329.85 | 0.18  | -0.43  | 0.55 | 0.00E+00 |
| 1-palmitoyl-2-(hydroxylinooleoyl)-GPC (16:0/18:2(OH))*          | 6.17  | 19.56 | 2.85  | 7.31   | 317.50 | 0.00  | -0.12  | 0.55 | 3.98E+01 |
| hexadecaspingosine (d16:1)*                                     | 1.01  | 0.31  | -1.04 | 1.86   | 30.51  | 0.05  | -0.25  | 0.99 |          |
| ceramide (d16:1/24:1, d18:1/22:1)*                              | 1.03  | 0.40  | -0.71 | 1.38   | 38.94  | 0.02  | -0.16  | 0.98 | 2.31E+01 |
| N-palmitoyl-heptadecaspingosine (d17:1/16:0)*                   | 1.03  | 0.43  | -1.00 | 0.30   | 41.74  | 0.18  | -0.43  | 0.98 | 2.90E+00 |
| ceramide (d18:1/14:0, d16:1/16:0)*                              | 1.06  | 0.45  | -0.26 | 0.41   | 42.68  | 0.01  | -0.13  | 0.97 | 0.00E+00 |
| ceramide (d18:1/17:0, d17:1/18:0)*                              | 1.06  | 0.41  | -0.58 | 0.57   | 38.57  | 0.04  | -0.21  | 0.98 |          |
| ceramide (d18:2/24:1, d18:1/24:2)*                              | 1.04  | 0.33  | -0.19 | -0.06  | 31.58  | 0.00  | -0.12  | 0.98 | 3.24E-01 |
| glycosyl ceramide (d18:2/24:1, d18:1/24:2)*                     | 1.03  | 0.37  | -0.17 | 0.18   | 35.71  | 0.00  | -0.12  | 0.97 | 6.58E-08 |
| glycosyl-N-tricosanoyl-sphingadienine (d18:2/23:0)*             | 1.04  | 0.43  | -0.60 | 0.99   | 40.92  | 0.01  | -0.13  | 0.98 |          |
| glycosyl ceramide (d18:1/23:1, d17:1/24:1)*                     | 1.02  | 0.43  | -0.91 | -0.28  | 42.36  | 0.24  | -0.49  | 0.98 |          |
| glycosyl-N-(2-hydroxynervonoyl)-sphingosine (d18:1/24:1(2OH))*  | 1.08  | 0.51  | -0.26 | 0.10   | 46.93  | 0.00  | -0.12  | 0.97 | 1.18E+01 |
| ceramide (d18:1/20:0, d16:1/22:0, d20:1/18:0)*                  | 1.03  | 0.31  | -0.47 | 1.21   | 29.72  | 0.00  | -0.12  | 0.98 |          |
| stearoylcholine*                                                | 1.11  | 0.59  | -0.76 | 1.01   | 53.04  | 0.00  | -0.12  | 0.97 | 0.00E+00 |
| linoleoylcholine*                                               | 1.08  | 0.55  | -0.59 | 0.42   | 51.46  | 0.00  | -0.12  | 0.97 | 0.00E+00 |
| 1-adrenoyl-GPE (22:4)*                                          | 1.20  | 0.78  | -0.74 | 0.96   | 64.74  | 0.09  | -0.31  | 0.91 | 1.33E-07 |
| 1-docosapentaenoyl-GPE (22:5n3)*                                | 1.09  | 0.48  | -0.82 | 2.14   | 44.02  | 0.02  | -0.18  | 0.96 | 2.92E+00 |
| trazadone                                                       | 1.33  | 1.24  | 6.04  | 36.23  | 93.22  | 5.76  | 31.94  | 0.88 | 3.18E+01 |
| nisinate (24:6n3)                                               | 1.42  | 1.74  | 0.74  | -0.69  | 122.43 | 0.86  | -0.26  | 0.68 |          |
| sphingomyelin (d18:0/20:0, d16:0/22:0)*                         | 1.08  | 0.46  | -0.07 | 0.09   | 42.54  | 0.00  | -0.12  | 0.96 | 0.00E+00 |
| sphingomyelin (d18:1/19:0, d19:1/18:0)*                         | 1.04  | 0.37  | -0.56 | 1.04   | 35.43  | 0.00  | -0.12  | 0.99 | 0.00E+00 |
| sphingomyelin (d18:2/18:1)*                                     | 1.02  | 0.29  | -0.32 | -0.07  | 28.45  | 0.00  | -0.12  | 0.99 | 8.78E-01 |
| sphingomyelin (d18:2/24:2)*                                     | 1.06  | 0.33  | 0.07  | -0.15  | 31.17  | 0.00  | -0.12  | 0.97 | 0.00E+00 |
| sphingomyelin (d18:2/21:0, d16:2/23:0)*                         | 1.05  | 0.39  | -0.71 | 2.05   | 36.96  | 0.00  | -0.12  | 0.98 | 0.00E+00 |
| sphingomyelin (d18:2/23:1)*                                     | 1.04  | 0.38  | -0.27 | 0.08   | 36.42  | 0.00  | -0.12  | 0.98 | 0.00E+00 |
| sphingomyelin (d18:1/25:0, d19:0/24:1, d20:1/23:0, d19:1/24:0)* | 1.09  | 0.51  | -0.25 | 0.19   | 47.28  | 0.00  | -0.12  | 0.96 | 0.00E+00 |
| sphingomyelin (d17:2/16:0, d18:2/15:0)*                         | 1.07  | 0.43  | -0.44 | 0.80   | 40.39  | 0.00  | -0.12  | 0.98 | 1.30E+00 |
| heneicosapentaenoate (21:5n3)                                   | 3.15  | 5.95  | 1.20  | 0.40   | 189.10 | 1.01  | -0.04  | 0.66 | 0.00E+00 |
| linolenoylcarnitine (C18:3)*                                    | 1.05  | 0.44  | -0.40 | 0.21   | 42.29  | 0.02  | -0.16  | 0.97 | 1.04E+00 |
| behenoylcarnitine (C22)*                                        | 1.18  | 0.73  | 0.43  | 0.27   | 62.16  | 0.07  | -0.28  | 0.87 | 3.54E+00 |
| arachidoylcarnitine (C20)*                                      | 1.02  | 0.37  | -0.51 | 0.60   | 36.73  | 0.01  | -0.15  | 0.98 | 0.00E+00 |
| lignoceroylcarnitine (C24)*                                     | 1.08  | 0.47  | 0.53  | 0.44   | 43.31  | 0.00  | -0.12  | 0.92 | 0.00E+00 |
| cerotoylcarnitine (C26)*                                        | 1.05  | 0.36  | -0.01 | -0.06  | 34.28  | 0.00  | -0.12  | 0.97 | 0.00E+00 |
| ximenoylcarnitine (C26:1)*                                      | 1.01  | 0.31  | -0.04 | -0.07  | 30.94  | 0.00  | -0.12  | 0.98 | 1.82E+00 |
| arachidonoylcarnitine (C20:4)                                   | 1.07  | 0.40  | -0.16 | -0.12  | 37.10  | 0.01  | -0.13  | 0.98 | 0.00E+00 |
| eicosenoylcarnitine (C20:1)*                                    | 1.06  | 0.39  | -0.18 | -0.11  | 36.40  | 0.00  | -0.12  | 0.98 | 3.19E+00 |
| dihomo-linolenoylcarnitine (C20:2)*                             | 1.05  | 0.34  | -0.10 | -0.27  | 32.66  | 0.00  | -0.12  | 0.98 | 0.00E+00 |
| dihomo-linolenoylcarnitine (C20:3n3 or 6)*                      | 1.04  | 0.33  | -0.28 | 0.19   | 31.79  | 0.00  | -0.12  | 0.99 | 0.00E+00 |
| erucoylcarnitine (C22:1)*                                       | 1.10  | 0.55  | -0.20 | -0.63  | 50.33  | 0.24  | -0.48  | 0.93 |          |
| nervonoylcarnitine (C24:1)*                                     | 1.04  | 0.33  | -0.32 | 0.16   | 31.94  | 0.02  | -0.18  | 0.98 | 0.00E+00 |
| adrenoylcarnitine (C22:4)*                                      | 1.09  | 0.41  | -0.15 | -1.30  | 37.53  | 0.45  | -0.55  | 0.97 |          |
| glycosyl ceramide (d18:1/20:0, d16:1/22:0)*                     | 1.02  | 0.33  | -0.08 | -0.01  | 32.43  | 0.00  | -0.12  | 0.98 | 9.28E-01 |
| 1-lignoceroyl-2-arachidonoyl-GPC (24:0/20:4)*                   | 1.08  | 0.48  | -0.30 | 0.47   | 44.16  | 0.03  | -0.20  | 0.96 |          |
| 1-nervonoyl-2-arachidonoyl-GPC (24:1/20:4)*                     | 1.03  | 0.40  | -0.92 | 2.47   | 39.08  | 0.03  | -0.20  | 0.96 | 1.68E+01 |
| N-oxalyl glycine (NOG)                                          | 1.09  | 0.61  | -0.51 | -0.53  | 55.62  | 0.21  | -0.46  | 0.94 | 5.71E+00 |
| N,N,N-trimethyl-5-aminovaleate                                  | 1.09  | 0.51  | -0.13 | 0.16   | 47.08  | 0.00  | -0.12  | 0.96 | 0.00E+00 |
| ethyl alpha-glucopyranoside                                     | 3.20  | 5.91  | 0.48  | -1.05  | 184.92 | 0.66  | -0.46  | 0.72 | 0.00E+00 |
| carotene diol (1)                                               | 1.11  | 0.68  | -2.23 | 9.59   | 61.78  | 0.01  | -0.13  | 0.94 | 0.00E+00 |
| carotene diol (2)                                               | 1.14  | 0.72  | -1.38 | 4.29   | 63.72  | 0.03  | -0.19  | 0.92 | 0.00E+00 |
| carotene diol (3)                                               | 1.11  | 0.59  | -1.15 | 1.09   | 53.16  | 0.13  | -0.37  | 0.96 | 1.24E+01 |
| cortolone glucuronide (1)                                       | 1.07  | 0.41  | -0.58 | 1.42   | 38.07  | 0.02  | -0.18  | 0.97 | 3.66E+00 |
| fluconazole                                                     | 1.00  | 0.87  | 13.30 | 178.34 | 87.00  | 13.03 | 168.78 | 1.00 | 1.19E+02 |
| Fibrinopeptide B                                                | 1.60  | 2.30  | 2.49  | 4.78   | 143.97 | 2.38  | 4.38   | 0.76 | 0.00E+00 |
| 1-oleyl-2-linoleoyl-GPC (O-18:1/18:2)*                          | 1.09  | 0.42  | -0.38 | -1.28  | 38.73  | 0.45  | -0.55  | 0.96 | 1.44E+01 |
| 1-palmityl-2-dihomo-linolenoyl-GPC (O-16:0/20:3)*               | 1.03  | 0.33  | -0.27 | -0.15  | 31.90  | 0.01  | -0.15  | 0.99 | 4.22E-01 |
| phosphatidylcholine (O-18:1/20:4, O-16:0/22:5n3)*               | 1.00  | 0.24  | 0.14  | 0.41   | 23.77  | 0.00  | -0.12  | 0.97 | 4.76E-08 |
| 1-palmitoyl-2-pentadecanoyl-GPC (16:0/15:0)*                    | 1.06  | 0.40  | -0.06 | -0.42  | 38.07  | 0.00  | -0.12  | 0.97 | 0.00E+00 |
| (N(1) + N(8))-acetylspermidine                                  | 1.06  | 0.34  | 0.09  | 0.11   | 32.59  | 0.00  | -0.12  | 0.97 | 9.34E-01 |
| THC carboxylic acid                                             | 1.81  | 1.91  | 4.43  | 19.05  | 105.90 | 3.87  | 13.71  | 0.88 | 4.68E+01 |
| THC carboxylic acid glucuronide                                 | 1.73  | 1.80  | 4.41  | 18.79  | 104.39 | 3.98  | 14.54  | 0.89 | 5.86E+01 |
| 5-dodecenoylcarnitine (C12:1)                                   | 1.21  | 0.80  | -0.44 | 0.49   | 65.95  | 0.03  | -0.20  | 0.92 | 4.78E+00 |
| 2-butenoylglycine                                               | 1.17  | 0.79  | -0.09 | -1.08  | 67.36  | 0.44  | -0.55  | 0.88 | 2.62E+01 |
| hydroxy-CMPF*                                                   | 2.00  | 2.89  | -0.20 | 0.18   | 144.83 | 0.00  | -0.12  | 0.78 | 0.00E+00 |
| 3-hydroxyoleoylcarnitine                                        | 1.10  | 0.53  | -0.52 | 0.12   | 48.46  | 0.06  | -0.26  | 0.97 | 6.44E+00 |
| 3-hydroxyphenylacetoylglutamine                                 | 1.24  | 1.05  | -0.04 | -0.33  | 84.73  | 0.11  | -0.35  | 0.85 | 7.83E+00 |
| trans-2-hexenoylglycine                                         | 1.32  | 1.06  | -0.36 | -0.47  | 80.23  | 0.18  | -0.43  | 0.90 | 1.24E+01 |
| 2-hydroxyarachidate*                                            | 1.08  | 0.33  | 0.17  | 0.43   | 30.63  | 0.02  | -0.16  | 0.96 | 1.28E+01 |
| N-stearoylserine*                                               | 1.06  | 0.40  | -0.31 | 0.50   | 37.73  | 0.03  | -0.19  | 0.97 | 3.09E+01 |
| lyxonate                                                        | 1.04  | 0.48  | -0.88 | 1.85   | 46.43  | 0.04  | -0.23  | 0.94 | 0.00E+00 |
| dodecenedioate (C12:1-DC)*                                      | 1.30  | 1.26  | 0.14  | 1.13   | 97.01  | 0.02  | -0.16  | 0.76 | 6.45E+00 |
| hexadecenedioate (C16:1-DC)*                                    | 1.13  | 0.67  | 0.39  | 1.54   | 59.53  | 0.00  | -0.12  | 0.81 | 0.00E+00 |
| octadecenedioate (C18:1-DC)                                     | 1.15  | 0.62  | 0.01  | -0.01  | 53.94  | 0.00  | -0.12  | 0.93 | 0.00E+00 |
| heptenedioate (C7:1-DC)*                                        | 1.08  | 0.57  | -0.76 | 1.20   | 52.77  | 0.01  | -0.13  | 0.95 | 0.00E+00 |
| octadecadienedioate (C18:2-DC)*                                 | 1.57  | 2.38  | 1.17  | 2.68   | 151.45 | 0.00  | -0.12  | 0.63 | 0.00E+00 |

Supplementary Table 1: Distribution of raw and transformed metabolites, the correlation between raw and transformed metabolite values, and coefficient of variation of raw metabolites

|                                                           |      |       |       |        |        |       |        |         |          |
|-----------------------------------------------------------|------|-------|-------|--------|--------|-------|--------|---------|----------|
| glucuronide of C12H22O4 (1)*                              | 1.59 | 1.88  | 2.11  | 4.13   | 118.35 | 1.45  | 0.92   | 0.74    | 2.57E+01 |
| glucuronide of C10H18O2 (1)*                              | 2.12 | 4.04  | 1.19  | 0.61   | 190.62 | 0.97  | -0.11  | 0.64    | 1.46E+01 |
| 3-carboxy-4-methyl-5-pentyl-2-furanpropionate (3-CMPFP)** | 1.07 | 0.48  | -0.03 | 0.26   | 44.38  | 0.00  | -0.12  | 0.94    | 0.00E+00 |
| methylnaphthyl sulfate (1)*                               | 3.12 | 4.83  | 2.88  | 7.92   | 154.68 | 2.18  | 3.48   | 0.79    | 2.81E+01 |
| methylnaphthyl sulfate (2)*                               | 2.32 | 3.13  | 1.53  | 0.86   | 135.40 | 1.42  | 0.83   | 0.83    | 5.00E+01 |
| glucuronide of C10H18O2 (7)*                              | 2.87 | 8.36  | 0.42  | 0.32   | 291.26 | 0.23  | -0.48  | 0.51    | 3.17E+01 |
| glucuronide of C10H18O2 (8)*                              | 2.68 | 5.69  | 1.46  | 1.58   | 212.48 | 1.07  | 0.07   | 0.62    | 4.26E+01 |
| N-acetyl-2-aminooctanoate*                                | 1.17 | 0.72  | 0.09  | -0.12  | 61.79  | 0.00  | -0.12  | 0.92    | 0.00E+00 |
| hydroxyparagrine**                                        | 1.05 | 0.29  | 0.34  | 0.44   | 28.08  | 0.00  | -0.12  | 0.95    | 7.01E-01 |
| perfluorooctanoate (PFOA)                                 | 1.13 | 0.74  | -0.83 | 2.61   | 65.90  | 0.00  | -0.12  | 0.87    | 0.00E+00 |
| pyroglutamylphenylalanine                                 | 1.08 | 0.38  | -0.16 | -1.15  | 34.86  | 0.45  | -0.55  | 0.94 NA |          |
| 3-hydroxybutyrylglycine**                                 | 1.25 | 1.01  | -0.46 | -0.29  | 81.09  | 0.14  | -0.38  | 0.90    | 3.93E+00 |
| carboxybupropfen glucuronide*                             | 2.34 | 2.79  | 4.13  | 16.29  | 119.58 | 3.59  | 11.63  | 0.86    | 0.00E+00 |
| glyco-beta-muricholate**                                  | 1.81 | 4.33  | 0.02  | 0.75   | 239.02 | 0.11  | -0.35  | 0.48    | 0.00E+00 |
| N-methylhydroxyproline**                                  | 1.73 | 2.33  | 0.79  | -0.58  | 134.82 | 0.85  | -0.27  | 0.77    | 4.70E+01 |
| N,N,N-trimethyl-alanylproline betaine (TMAP)              | 1.04 | 0.29  | 0.09  | 1.06   | 28.39  | 0.00  | -0.12  | 0.95    | 2.06E-07 |
| 3-formylindole                                            | 0.99 | 0.31  | -0.28 | 0.32   | 31.30  | 0.00  | -0.12  | 0.98    | 3.48E+00 |
| 1-(1-enyl-oleoyl)-2-docosahexaenoyl-GPC (P-18:1/22:6)*    | 1.09 | 0.49  | -0.01 | -0.26  | 45.36  | 0.00  | -0.12  | 0.96    | 0.00E+00 |
| pyroglutamylalanine*                                      | 2.24 | 4.11  | 1.16  | 2.58   | 183.96 | 0.16  | -0.41  | 0.62 NA |          |
| pyroglutamylproline*                                      | 1.41 | 1.38  | -0.15 | 0.58   | 97.92  | 0.13  | -0.38  | 0.76    | 3.47E+01 |
| pyroglutamylleucine*                                      | 1.08 | 0.35  | -0.48 | 0.95   | 32.52  | 0.03  | -0.19  | 0.97    | 1.75E+00 |
| pyroglutamylisoleucine*                                   | 1.06 | 0.32  | -0.22 | -1.04  | 29.81  | 0.38  | -0.54  | 0.97 NA |          |
| gamma-glutamylcitrulline*                                 | 1.13 | 0.59  | -0.84 | 1.23   | 52.40  | 0.07  | -0.28  | 0.96    | 6.28E+00 |
| resveratrol disulfate (1)*                                | 1.13 | 1.13  | 3.75  | 12.78  | 100.10 | 3.59  | 11.63  | 0.90    | 9.67E+01 |
| resveratrol disulfate (2)*                                | 2.63 | 5.94  | 3.70  | 14.62  | 226.28 | 2.75  | 6.28   | 0.64    | 5.23E+01 |
| glycine conjugate of C10H12O2*                            | 1.14 | 0.59  | -0.41 | -1.03  | 52.15  | 0.39  | -0.54  | 0.93    | 5.90E-01 |
| glycine conjugate of C10H14O2 (1)*                        | 1.17 | 0.71  | -0.29 | 0.41   | 61.13  | 0.00  | -0.12  | 0.94    | 0.00E+00 |
| glutamine conjugate of C7H12O2*                           | 1.59 | 2.04  | -0.35 | 0.33   | 128.19 | 0.02  | -0.16  | 0.77    | 0.00E+00 |
| glutamine conjugate of C6H10O2 (1)*                       | 1.29 | 1.15  | 0.37  | 0.50   | 89.24  | 0.00  | -0.12  | 0.80    | 0.00E+00 |
| glutamine conjugate of C6H10O2 (2)*                       | 1.69 | 2.37  | 0.06  | -0.03  | 140.64 | 0.00  | -0.12  | 0.73    | 0.00E+00 |
| dihydroferulic acid sulfate                               | 2.53 | 5.21  | 1.31  | 1.08   | 206.40 | 0.97  | -0.11  | 0.63    | 3.48E+01 |
| sphingomyelin (d17:1/14:0, d16:1/15:0)*                   | 1.05 | 0.51  | -0.28 | 0.11   | 48.82  | 0.00  | -0.12  | 0.96    | 0.00E+00 |
| tetradecadienoate (14:2)*                                 | 1.41 | 1.39  | 0.05  | 0.75   | 98.29  | 0.00  | -0.12  | 0.76    | 4.27E+00 |
| 8-methoxykynurenate                                       | 1.16 | 0.66  | -0.72 | 0.20   | 56.78  | 0.11  | -0.35  | 0.94    | 9.09E+00 |
| 3-amino-2-piperidone                                      | 1.05 | 0.40  | 0.06  | 0.75   | 37.69  | 0.00  | -0.12  | 0.94    | 0.00E+00 |
| N,N-dimethylalanine                                       | 1.48 | 1.59  | 0.11  | -0.21  | 107.24 | 0.13  | -0.37  | 0.79    | 0.00E+00 |
| 3-indoleglyoxylic acid                                    | 1.13 | 0.69  | 0.97  | 2.00   | 61.11  | 0.00  | -0.12  | 0.82    | 1.49E+01 |
| ethyl beta-glucopyranoside                                | 2.08 | 3.31  | 0.16  | -0.30  | 159.33 | 0.03  | -0.19  | 0.72    | 0.00E+00 |
| 2-hydroxysebacate                                         | 1.24 | 0.75  | 0.04  | -0.02  | 60.35  | 0.09  | -0.32  | 0.90    | 1.12E+01 |
| enterolactone sulfate                                     | 1.65 | 1.82  | 1.08  | -0.15  | 110.57 | 1.04  | 0.01   | 0.84    | 0.00E+00 |
| ascorbic acid 3-sulfate*                                  | 1.12 | 0.68  | -0.34 | 1.22   | 61.26  | 0.00  | -0.12  | 0.91    | 0.00E+00 |
| 3-hydroxyhippurate sulfate                                | 2.25 | 6.09  | 0.50  | -0.49  | 270.49 | 0.49  | -0.54  | 0.50    | 1.67E+01 |
| 6-bromotryptophan                                         | 1.04 | 0.46  | 0.46  | 6.99   | 44.09  | 0.00  | -0.12  | 0.71    | 0.00E+00 |
| delta-CEHC                                                | 1.28 | 1.01  | -0.39 | 0.87   | 79.49  | 0.04  | -0.23  | 0.86    | 0.00E+00 |
| N6,N6-dimethyllysine                                      | 1.29 | 0.73  | -0.32 | -0.77  | 57.03  | 0.22  | -0.47  | 0.95    | 0.00E+00 |
| 1-carboxyethylphenylalanine                               | 1.11 | 0.53  | 0.39  | 0.21   | 48.06  | 0.00  | -0.12  | 0.91    |          |
| 1-carboxyethyltyrosine                                    | 1.16 | 0.55  | -0.13 | -0.20  | 47.33  | 0.10  | -0.32  | 0.94    |          |
| 1-carboxyethylvaline                                      | 1.08 | 0.55  | -0.32 | 0.07   | 51.25  | 0.01  | -0.13  | 0.96    |          |
| 1-carboxyethylleucine                                     | 1.11 | 0.54  | 0.08  | 0.15   | 48.18  | 0.01  | -0.13  | 0.94    |          |
| 1-carboxyethylisoleucine                                  | 1.14 | 0.64  | 0.08  | 0.08   | 56.24  | 0.04  | -0.21  | 0.91    |          |
| dodecadienoate (12:2)*                                    | 1.09 | 0.54  | -0.28 | 0.82   | 49.35  | 0.00  | -0.12  | 0.92    | 0.00E+00 |
| iodoacetoylcarnitine*                                     | 1.41 | 1.22  | -0.14 | -0.86  | 87.10  | 0.38  | -0.54  | 0.82    | 1.30E-03 |
| gamma-CEHC sulfate                                        | 1.85 | 2.27  | 0.99  | 0.11   | 123.02 | 0.82  | -0.31  | 0.78    | 1.28E+01 |
| delta-CEHC glucuronide                                    | 1.34 | 1.34  | 0.32  | -0.40  | 99.86  | 0.35  | -0.54  | 0.76    | 5.57E+00 |
| N-acetyl-isoptreanine                                     | 1.06 | 0.45  | -0.94 | 3.51   | 42.65  | 0.01  | -0.15  | 0.97    | 0.00E+00 |
| glucuronide of piperine metabolite C17H21NO3 (3)*         | 1.39 | 1.22  | -0.26 | -1.17  | 87.66  | 0.37  | -0.54  | 0.91    | 1.20E+01 |
| glucuronide of piperine metabolite C17H21NO3 (4)*         | 1.46 | 1.26  | -0.65 | -0.58  | 86.55  | 0.26  | -0.50  | 0.91    | 4.82E+00 |
| glucuronide of piperine metabolite C17H21NO3 (5)*         | 1.43 | 1.26  | -0.54 | -0.68  | 87.74  | 0.24  | -0.48  | 0.91    | 0.00E+00 |
| sulfate of piperine metabolite C16H19NO3 (2)*             | 1.35 | 1.14  | -0.70 | 0.48   | 84.10  | 0.05  | -0.25  | 0.92    | 0.00E+00 |
| sulfate of piperine metabolite C16H19NO3 (3)*             | 1.31 | 1.14  | -0.61 | 0.25   | 87.10  | 0.05  | -0.24  | 0.91    | 0.00E+00 |
| sulfate of piperine metabolite C18H21NO3 (1)*             | 1.33 | 1.08  | -0.68 | 0.10   | 80.93  | 0.09  | -0.32  | 0.92    | 4.50E-08 |
| 5-hydroxyindole glucuronide                               | 1.37 | 2.64  | 0.14  | -0.33  | 193.49 | 0.44  | -0.55  | 0.42    | 9.23E+00 |
| N-acetylhomocitrulline                                    | 1.32 | 1.00  | 1.11  | 0.02   | 76.08  | 1.11  | 0.13   | 0.84    |          |
| 2-naphthol sulfate                                        | 2.36 | 3.86  | 0.16  | -0.28  | 163.68 | 0.03  | -0.19  | 0.72    | 0.00E+00 |
| (2,4 or 2,5)-dimethylphenol sulfate                       | 2.86 | 3.86  | 0.57  | -0.84  | 135.25 | 0.47  | -0.54  | 0.83    | 4.23E+01 |
| 4-ethylcatechol sulfate                                   | 1.51 | 1.68  | -0.40 | 0.56   | 111.35 | 0.01  | -0.13  | 0.83    | 1.96E-06 |
| 11beta-hydroxyandrosterone glucuronide                    | 1.11 | 0.62  | -1.01 | 2.89   | 56.30  | 0.02  | -0.18  | 0.94    | 0.00E+00 |
| 11beta-hydroxyetiocholanolone glucuronide*                | 1.04 | 0.62  | -0.59 | -0.44  | 60.18  | 0.16  | -0.41  | 0.96    | 1.81E+00 |
| N2-acetyl,N6-methyllysine                                 | 1.51 | 1.62  | -0.19 | -1.03  | 107.00 | 0.35  | -0.54  | 0.85    | 0.00E+00 |
| cholic acid glucuronide                                   | 1.48 | 1.39  | 0.79  | -0.67  | 94.24  | 0.77  | -0.36  | 0.88    | 1.37E+01 |
| deoxycholic acid glucuronide                              | 1.35 | 1.27  | -0.56 | 0.63   | 94.30  | 0.01  | -0.13  | 0.86    | 0.00E+00 |
| 4-allylcatechol sulfate                                   | 2.30 | 4.32  | 0.16  | 0.42   | 188.31 | 0.02  | -0.18  | 0.68    | 0.00E+00 |
| 2-hydroxyfluorene sulfate                                 | 2.52 | 4.32  | 1.17  | 0.38   | 171.92 | 0.91  | -0.20  | 0.72    | 3.65E+01 |
| vanillate glucuronide                                     | 1.44 | 1.01  | 5.06  | 27.34  | 70.11  | 4.09  | 15.46  | 0.86    | 1.29E+01 |
| 4-methylhexanoylglutamine                                 | 1.31 | 1.04  | -0.15 | -0.49  | 79.73  | 0.20  | -0.45  | 0.87    | 1.36E+01 |
| Benazeprilat                                              | 1.00 | 0.61  | 13.72 | 192.43 | 61.01  | 13.03 | 168.78 | 1.00    | 4.51E+01 |
| 1-nonadecenoyl-GPC (19:1)*                                | 1.05 | 0.52  | -0.75 | -0.69  | 49.36  | 0.31  | -0.52  | 0.97    | 6.22E+00 |
| desmethylcitalopram*                                      | 1.69 | 1.58  | 6.14  | 38.84  | 93.63  | 4.82  | 22.02  | 0.91    | 3.82E+01 |
| citalopram propionate*                                    | 1.21 | 0.94  | 6.44  | 43.79  | 78.06  | 5.01  | 23.93  | 0.90    | 1.14E+01 |
| 4-hydroxy duloxetine glucuronide*                         | 0.97 | 0.45  | 18.41 | 338.02 | 46.40  | 18.41 | 338.02 | 1.00    | 1.17E+02 |
| 5-hydroxy-6-methoxy duloxetine sulfate*                   | 0.83 | 0.24  | 18.41 | 338.02 | 28.66  | 18.41 | 338.02 | 1.00    | 1.22E+02 |
| N-desalkylquetiapine*                                     | 0.82 | 0.33  | 18.41 | 338.02 | 40.06  | 18.41 | 338.02 | 1.00    | 5.31E+01 |
| ranitidine N-oxide*                                       | 1.00 | 0.19  | 18.41 | 338.02 | 19.20  | 18.41 | 338.02 | 1.00 NA |          |
| 7-hydroxywarfarin                                         | 0.94 | 0.13  | 10.54 | 109.47 | 13.51  | 10.63 | 111.92 | 0.84    | 3.20E+01 |
| glycoursodeoxycholic acid sulfate (1)                     | 1.94 | 2.51  | -0.21 | -1.05  | 129.28 | 0.38  | -0.54  | 0.80    | 0.00E+00 |
| dihydrocaffeate sulfate (2)                               | 2.34 | 5.85  | 0.25  | 0.31   | 250.33 | 0.20  | -0.45  | 0.53    | 0.00E+00 |
| lithocholate sulfate (1)                                  | 1.39 | 1.29  | -0.73 | 1.00   | 92.77  | 0.04  | -0.23  | 0.89    | 0.00E+00 |
| 3-hydroxyhexanoylcarnitine (1)                            | 1.13 | 0.52  | -0.66 | -0.84  | 46.19  | 0.35  | -0.54  | 0.94    | 1.74E+01 |
| 3-(methylthio)acetaminophen sulfate*                      | 3.14 | 5.91  | 2.03  | 2.81   | 188.64 | 1.71  | 1.69   | 0.72    | 0.00E+00 |
| 2-ketocaprylate                                           | 1.14 | 0.72  | -1.75 | 5.52   | 63.16  | 0.04  | -0.23  | 0.90    | 1.89E-07 |
| 2,6-dihydroxybenzoic acid                                 | 1.30 | 1.05  | -0.05 | -0.37  | 80.78  | 0.00  | -0.12  | 0.91    | 0.00E+00 |
| tetrahydrocortisol sulfate (1)                            | 1.22 | 0.83  | 0.59  | -0.96  | 68.22  | 0.73  | -0.40  | 0.91    | 6.47E+00 |
| 3-ethylcatechol sulfate (1)                               | 1.47 | 1.47  | -0.44 | -0.78  | 100.36 | 0.25  | -0.49  | 0.89    | 8.10E+00 |
| 3-ethylcatechol sulfate (2)                               | 1.25 | 1.10  | 1.38  | 0.64   | 87.94  | 1.19  | 0.29   | 0.87    | 1.17E+01 |
| 4-acetylcatechol sulfate (1)                              | 1.35 | 1.44  | -0.20 | -0.43  | 106.76 | 0.18  | -0.43  | 0.81    | 0.00E+00 |
| 1-(14 or 15-methyl)palmitoyl-GPC (a17:0 or i17:0)*        | 1.04 | 0.48  | -0.32 | 0.44   | 45.93  | 0.01  | -0.15  | 0.96    | 0.00E+00 |
| montelukast                                               | 1.15 | 0.29  | 12.08 | 159.46 | 25.03  | 9.20  | 83.58  | 0.94    | 3.00E+01 |
| 2,3-dihydroxy-5-methylthio-4-pentenoate (DMTPA)*          | 1.02 | 0.23  | 0.10  | 0.72   | 22.31  | 0.00  | -0.12  | 0.98    | 0.00E+00 |
| Fibrinopeptide A (3-16)**                                 | 1.13 | 0.87  | 2.45  | 4.33   | 76.88  | 2.51  | 5.03   | 0.87    |          |
| meloxicam                                                 | 1.05 | 0.54  | 11.30 | 137.90 | 50.87  | 9.20  | 83.58  | 0.95    | 1.36E+02 |
| Fibrinopeptide B (1-13)**                                 | 2.09 | 3.13  | 2.41  | 4.30   | 150.40 | 2.26  | 3.83   | 0.79    | 0.00E+00 |
| losartan                                                  | 1.75 | 2.52  | 4.73  | 21.85  | 144.80 | 4.09  | 15.46  | 0.82    | 0.00E+00 |
| cyclobenzaprine                                           | 1.33 | 1.30  | 5.85  | 34.20  | 97.38  | 5.48  | 28.79  | 0.84    | 8.19E+01 |
| emtricitabine                                             | 1.00 | 0.16  | 10.63 | 112.00 | 16.40  | 10.63 | 112.06 | 1.00    | 6.94E+01 |
| darunavir                                                 | 1.57 | 0.53  | 13.07 | 170.23 | 33.89  | 13.03 | 168.78 | 1.00    | 0.00E+00 |
| 5-hydroxy-2-methylpyridine sulfate                        | 4.10 | 7.73  | 1.32  | 0.74   | 188.81 | 0.93  | -0.77  | 0.72    | 0.00E+00 |
| 3-hydroxy-2-methylpyridine sulfate                        | 4.31 | 12.35 | 1.46  | 2.21   | 287.20 | 0.44  | -0.55  | 0.57    | 0.00E+00 |

Supplementary Table 1: Distribution of raw and transformed metabolites, the correlation between raw and transformed metabolite values, and coefficient of variation of raw metabolites

|                                                                     |      |       |       |        |        |       |        |      |          |
|---------------------------------------------------------------------|------|-------|-------|--------|--------|-------|--------|------|----------|
| hydroxypalmitoyl sphingomyelin (d18:1/16:0(OH))**                   | 1.03 | 0.30  | -0.11 | 0.44   | 29.09  | 0.00  | -0.12  | 0.98 | 0.00E+00 |
| tamoxifen                                                           | 0.99 | 0.02  | 18.41 | 338.02 | 1.67   | 18.41 | 338.02 | 1.00 | 8.67E+00 |
| taurochenodeoxycholic acid 3-sulfate                                | 1.72 | 2.54  | 0.06  | -1.07  | 147.97 | 0.43  | -0.55  | 0.70 | 0.00E+00 |
| tetradecadienedioate (C14:2-DC)*                                    | 1.31 | 1.14  | -0.47 | 0.25   | 87.07  | 0.10  | -0.33  | 0.83 | 0.00E+00 |
| pregnenetriol sulfate*                                              | 1.14 | 0.69  | -0.75 | 1.45   | 60.49  | 0.00  | -0.12  | 0.95 | 0.00E+00 |
| pregnenetriol disulfate*                                            | 1.38 | 1.34  | -0.61 | 1.70   | 97.49  | 0.00  | -0.12  | 0.83 | 0.00E+00 |
| eicosenedioate (C20:1-DC)*                                          | 1.08 | 0.56  | -0.43 | 0.17   | 51.72  | 0.00  | -0.12  | 0.96 | 0.00E+00 |
| hydroxy-N6,N6,N6-trimethyllysine*                                   | 1.02 | 0.52  | 0.38  | -1.23  | 50.92  | 0.67  | -0.45  | 0.94 | 2.72E+01 |
| undecenoylcarnitine (C11:1)                                         | 1.03 | 0.41  | -0.41 | 0.32   | 39.72  | 0.00  | -0.12  | 0.98 | 0.00E+00 |
| 3-decenoylcarnitine                                                 | 1.02 | 0.40  | -0.08 | -0.40  | 39.31  | 0.00  | -0.12  | 0.97 | 5.60E+01 |
| 3-hydroxydecanoylcarnitine                                          | 1.11 | 0.57  | -0.35 | 0.04   | 51.08  | 0.01  | -0.13  | 0.97 | 0.00E+00 |
| palmitoyl-sphingosine-phosphoethanolamine (d18:1/16:0)              | 1.01 | 0.21  | -0.28 | 0.41   | 20.56  | 0.00  | -0.12  | 0.99 | 0.00E+00 |
| picolinoylglycine                                                   | 1.12 | 0.60  | 0.12  | 0.30   | 53.80  | 0.00  | -0.12  | 0.91 | 0.00E+00 |
| 4-vinylcatechol sulfate                                             | 2.12 | 3.16  | -0.40 | -0.21  | 149.03 | 0.18  | -0.43  | 0.77 | 0.00E+00 |
| succinoyltaurine                                                    | 1.17 | 0.73  | 0.18  | -0.08  | 62.06  | 0.01  | -0.15  | 0.91 | 0.00E+00 |
| phenylalanylhydroxyproline*                                         | 1.31 | 0.92  | -0.49 | -0.25  | 70.55  | 0.20  | -0.45  | 0.89 | 1.71E+01 |
| ginkgolic acid C15:1                                                | 3.25 | 7.54  | 5.86  | 39.35  | 232.43 | 4.49  | 18.90  | 0.62 | 3.97E+01 |
| (15:3)-anacardic acid                                               | 1.59 | 2.24  | 2.83  | 7.51   | 140.97 | 2.32  | 4.10   | 0.71 | 2.04E+01 |
| ginkgolic acid C17:1                                                | 1.44 | 1.69  | 7.59  | 69.11  | 117.97 | 5.01  | 23.93  | 0.71 | 1.45E+01 |
| 3,5-dichloro-2,6-dihydroxybenzoic acid                              | 1.02 | 0.39  | -1.32 | 4.51   | 38.15  | 0.00  | -0.12  | 0.98 | 9.86E-01 |
| metabolonic lactone sulfate                                         | 1.38 | 1.20  | -0.19 | 0.47   | 87.05  | 0.01  | -0.13  | 0.88 | 0.00E+00 |
| vanillic acid glycine                                               | 1.46 | 1.38  | -0.09 | -0.86  | 94.87  | 0.27  | -0.50  | 0.87 | 1.14E+01 |
| 2-hydroxy-4-(methylthio)butanoic acid                               | 1.12 | 0.58  | 0.04  | 0.04   | 51.36  | 0.00  | -0.12  | 0.94 | 0.00E+00 |
| branched chain 14:0 dicarboxylic acid**                             | 1.39 | 1.42  | -0.58 | 0.05   | 102.20 | 0.08  | -0.30  | 0.88 | 0.00E+00 |
| (2-butoxyethoxy)acetic acid                                         | 3.41 | 13.34 | 2.09  | 4.91   | 391.24 | 1.46  | 0.96   | 0.41 | 0.00E+00 |
| pentose acid*                                                       | 1.46 | 1.70  | 0.29  | 0.22   | 116.76 | 0.01  | -0.15  | 0.76 | 0.00E+00 |
| N-succinyl-phenylalanine                                            | 1.15 | 0.65  | 0.21  | -1.40  | 56.64  | 0.64  | -0.47  | 0.93 | 0.00E+00 |
| 1-methyl-5-imidazolelactate                                         | 1.26 | 1.02  | -0.53 | 0.68   | 81.45  | 0.00  | -0.12  | 0.88 | 1.88E-06 |
| (2 or 3)-decanoate (10:1n7 or n8)                                   | 1.23 | 0.70  | -0.43 | -0.07  | 57.29  | 0.01  | -0.15  | 0.96 | 9.56E+00 |
| chenodeoxycholic acid sulfate (1)                                   | 1.55 | 1.68  | 1.28  | 0.54   | 108.20 | 1.13  | 0.18   | 0.77 |          |
| branched-chain, straight-chain, or cyclopropyl 10:1 fatty acid (1)* | 1.09 | 0.64  | -0.56 | 0.57   | 59.03  | 0.01  | -0.13  | 0.96 | 0.00E+00 |
| branched-chain, straight-chain, or cyclopropyl 10:1 fatty acid (2)* | 1.05 | 0.55  | -0.49 | -1.14  | 52.08  | 0.37  | -0.54  | 0.97 | 2.09E+01 |
| carnitine of C10H14O2 (5)*                                          | 1.13 | 0.64  | -1.07 | 0.51   | 56.77  | 0.15  | -0.40  | 0.97 | 3.70E+01 |
| 3-bromo-5-chloro-2,6-dihydroxybenzoic acid*                         | 1.00 | 0.41  | -2.57 | 12.91  | 40.77  | 0.00  | -0.12  | 0.99 | 6.23E+00 |
| branched-chain, straight-chain, or cyclopropyl 12:1 fatty acid*     | 1.29 | 0.79  | -0.58 | 0.25   | 60.79  | 0.00  | -0.12  | 0.96 | 0.00E+00 |
| decadienedioic acid (C10:2-DC)**                                    | 1.26 | 1.13  | -0.68 | 1.24   | 89.45  | 0.02  | -0.18  | 0.86 | 0.00E+00 |
| deoxycholic acid 12-sulfate*                                        | 1.46 | 1.41  | -0.35 | -0.49  | 96.34  | 0.19  | -0.44  | 0.87 | 0.00E+00 |
| GlcNAc sulfate conjugate of C21H34O2 steroid**                      | 1.38 | 1.27  | 0.03  | -0.98  | 92.06  | 0.36  | -0.54  | 0.84 | 7.25E+00 |
| cis-3,4-methyleneheptanoate                                         | 1.13 | 0.64  | -0.47 | 0.48   | 57.19  | 0.00  | -0.12  | 0.96 | 0.00E+00 |
| cis-3,4-methyleneheptanoylcarnitine                                 | 1.13 | 0.57  | -0.44 | -0.04  | 50.53  | 0.00  | -0.12  | 0.97 | 0.00E+00 |
| N-acetyl-2-aminoadipate                                             | 1.05 | 0.39  | -0.06 | 0.03   | 37.29  | 0.02  | -0.16  | 0.97 | 1.92E-08 |
| De(carboxymethoxy) cetirizine acetic acid                           | 2.20 | 4.73  | 3.42  | 12.26  | 214.72 | 2.89  | 7.06   | 0.60 | 8.84E-06 |
| 4-chlorobenzoic acid                                                | 1.01 | 0.13  | 0.22  | 1.27   | 12.91  | 0.00  | -0.12  | 0.98 | 0.00E+00 |
| 2-methoxyhydroquinone sulfate (1)                                   | 1.64 | 2.05  | 0.43  | -0.79  | 124.93 | 0.45  | -0.55  | 0.80 | 0.00E+00 |
| temazepam                                                           | 1.39 | 1.49  | 10.99 | 122.66 | 107.29 | 10.63 | 111.92 | 0.95 | 1.03E+02 |
| 2,4-di-tert-butylphenol                                             | 1.04 | 0.33  | -0.05 | 1.79   | 32.13  | 0.01  | -0.13  | 0.94 | 6.67E+00 |
| 3-hydroxyoctanoylcarnitine (1)                                      | 1.12 | 0.55  | -0.35 | 0.15   | 49.12  | 0.02  | -0.18  | 0.96 | 0.00E+00 |
| 3-hydroxyoctanoylcarnitine (2)                                      | 1.11 | 0.52  | -0.83 | 0.98   | 47.48  | 0.06  | -0.17  | 0.97 | 0.00E+00 |
| cis-3,4-methyleneheptanoylglycine                                   | 1.24 | 0.85  | 0.07  | -0.24  | 69.28  | 0.00  | -0.12  | 0.91 | 0.00E+00 |
| bilirubin degradation product, C16H18N2O5 (1)**                     | 1.17 | 0.78  | -0.58 | 0.09   | 66.63  | 0.11  | -0.34  | 0.92 | 0.00E+00 |
| bilirubin degradation product, C16H18N2O5 (2)**                     | 1.14 | 0.70  | -0.17 | 0.06   | 62.06  | 0.00  | -0.12  | 0.92 | 3.32E+00 |
| bilirubin degradation product, C17H18N2O4 (1)**                     | 1.06 | 0.53  | -2.91 | 11.20  | 49.68  | 0.03  | -0.20  | 0.97 | 0.00E+00 |
| bilirubin degradation product, C17H18N2O4 (2)**                     | 1.06 | 0.56  | -2.68 | 10.49  | 52.90  | 0.01  | -0.13  | 0.97 | 0.00E+00 |
| bilirubin degradation product, C17H18N2O4 (3)**                     | 1.06 | 0.55  | -1.89 | 6.17   | 52.01  | 0.00  | -0.12  | 0.97 | 0.00E+00 |
| bilirubin degradation product, C17H20N2O5 (1)**                     | 1.22 | 0.94  | -0.54 | -0.11  | 77.45  | 0.00  | -0.12  | 0.93 | 6.97E+00 |
| bilirubin degradation product, C17H20N2O5 (2)**                     | 1.21 | 0.89  | -0.38 | -0.33  | 73.75  | 0.00  | -0.12  | 0.94 | 6.03E+00 |
| tetrahydrocortisol glucuronide                                      | 1.04 | 0.47  | -1.83 | 9.11   | 45.38  | 0.01  | -0.15  | 0.96 | 0.00E+00 |
| bilirubin degradation product, C16H18N2O5 (3)**                     | 1.14 | 0.61  | -0.24 | 0.71   | 53.58  | 0.00  | -0.12  | 0.93 | 3.03E+00 |
| bilirubin degradation product, C16H18N2O5 (4)**                     | 1.13 | 0.68  | -0.27 | 0.29   | 60.12  | 0.00  | -0.12  | 0.92 | 2.18E-06 |
| N,N-dimethyl-pro-pro                                                | 1.06 | 0.37  | -1.92 | 10.04  | 34.66  | 0.02  | -0.16  | 0.93 | 0.00E+00 |
| oxindolylalanine                                                    | 0.99 | 0.34  | -1.01 | 0.71   | 34.34  | 0.15  | -0.40  | 0.98 | 6.37E+00 |
| tetrahydrocortisone glucuronide (5)                                 | 1.06 | 0.53  | -0.51 | 1.18   | 49.85  | 0.02  | -0.16  | 0.95 | 4.57E-07 |
| perfluorohexanesulfonic acid                                        | 1.59 | 2.04  | -0.27 | 1.08   | 128.20 | 0.02  | -0.16  | 0.77 | 0.00E+00 |
| trans-4-hydroxyproline                                              | 1.15 | 0.56  | 0.43  | 0.01   | 48.69  | 0.00  | -0.12  | 0.92 | 0.00E+00 |
| allantoin                                                           | 1.03 | 0.31  | 1.49  | 7.01   | 29.96  | 0.00  | -0.12  | 0.80 | 4.57E+00 |
| xanthine                                                            | 1.17 | 1.56  | 2.38  | 19.78  | 132.99 | 0.00  | -0.12  | 0.38 | 0.00E+00 |
| 5-oxoproline                                                        | 1.08 | 0.44  | 1.68  | 4.13   | 40.93  | 0.00  | -0.12  | 0.81 | 4.77E+00 |
| sarcosine                                                           | 0.84 | 0.36  | -0.36 | -0.81  | 43.42  | 0.00  | -0.12  | 0.98 | 6.01E+00 |
| pantothenate                                                        | 1.25 | 0.92  | 0.83  | 1.21   | 73.42  | 0.00  | -0.12  | 0.81 | 0.00E+00 |
| pipecolate                                                          | 1.50 | 1.67  | 0.98  | 0.92   | 111.44 | 0.00  | -0.12  | 0.75 | 0.00E+00 |
| phosphoethanolamine                                                 | 1.11 | 0.44  | -0.44 | 1.32   | 39.62  | 0.00  | -0.12  | 0.97 | 1.65E+00 |
| glycerate                                                           | 0.97 | 0.39  | -0.95 | 0.52   | 40.29  | 0.00  | -0.12  | 0.99 | 0.00E+00 |
| 3-ureidopropionate                                                  | 1.09 | 0.49  | -0.18 | 2.79   | 45.22  | 0.03  | -0.19  | 0.86 | 1.17E+01 |
| 5-KETE                                                              | 1.29 | 1.23  | 4.47  | 20.44  | 95.76  | 3.87  | 13.71  | 0.82 | 8.08E+01 |
| N-acetyl-leucine                                                    | 1.07 | 0.37  | 0.32  | 1.13   | 35.05  | 0.01  | -0.13  | 0.92 | 7.64E+00 |
| N-acetylmethionine                                                  | 1.07 | 0.26  | 0.15  | 2.07   | 24.44  | 0.00  | -0.12  | 0.95 | 0.00E+00 |
| N-acetylvaline                                                      | 1.03 | 0.22  | 0.38  | 1.11   | 21.03  | 0.00  | -0.12  | 0.96 | 0.00E+00 |
| erucate (22:1n9)                                                    | 1.28 | 0.93  | 0.41  | 0.99   | 72.35  | 0.00  | -0.12  | 0.81 | 0.00E+00 |
| bilirubin (Z,Z)                                                     | 0.99 | 0.47  | -3.64 | 14.30  | 47.44  | 0.03  | -0.19  | 0.98 | 6.42E-01 |
| thyroxine                                                           | 1.01 | 0.23  | -0.29 | 0.93   | 22.68  | 0.00  | -0.12  | 0.99 | 4.87E-08 |
| gamma-glutamyltyrosine                                              | 1.17 | 0.61  | 1.19  | 2.80   | 51.93  | 0.00  | -0.12  | 0.81 | 0.00E+00 |
| alpha-tocopherol                                                    | 0.96 | 0.34  | -4.08 | 18.06  | 35.19  | 0.00  | -0.12  | 0.97 | 0.00E+00 |
| 3-hydroxyisobutyrate                                                | 1.14 | 0.61  | -0.57 | 3.81   | 53.31  | 0.01  | -0.15  | 0.88 | 1.88E+00 |
| N-acetylalanine                                                     | 1.02 | 0.18  | 0.42  | 1.03   | 17.37  | 0.00  | -0.12  | 0.97 | 0.00E+00 |
| vanillylmandelate (VMA)                                             | 1.01 | 0.34  | -0.49 | 0.94   | 34.06  | 0.00  | -0.12  | 0.98 | 1.95E+00 |
| 4-acetamidobutanoate                                                | 1.05 | 0.33  | 0.22  | 0.74   | 31.57  | 0.00  | -0.12  | 0.95 | 3.91E-07 |
| 3-aminoisobutyrate                                                  | 1.10 | 0.57  | -0.62 | 1.15   | 52.01  | 0.00  | -0.12  | 0.96 | 2.74E+00 |
| 3-hydroxy-3-methylglutarate                                         | 1.09 | 0.43  | 0.96  | 2.19   | 39.25  | 0.00  | -0.12  | 0.86 | 0.00E+00 |
| citrate                                                             | 1.02 | 0.16  | 0.17  | 0.34   | 15.46  | 0.00  | -0.12  | 0.98 | 0.00E+00 |
| 2-aminobutyrate                                                     | 1.06 | 0.35  | -0.08 | 0.26   | 32.59  | 0.00  | -0.12  | 0.97 | 1.86E+01 |
| urate                                                               | 1.03 | 0.26  | -0.52 | 0.88   | 25.61  | 0.00  | -0.12  | 1.00 | 0.00E+00 |
| ursodeoxycholate                                                    | 2.11 | 2.76  | 0.19  | -0.41  | 130.92 | 0.05  | -0.25  | 0.81 | 4.13E+01 |
| oleoyl ethanolamide                                                 | 1.24 | 0.65  | -0.07 | -0.04  | 52.64  | 0.00  | -0.12  | 0.94 | 2.88E+00 |
| gamma-glutamylglutamine                                             | 1.05 | 0.31  | -2.58 | 18.00  | 29.47  | 0.00  | -0.12  | 0.98 | 4.40E+00 |
| 4-hydroxyphenylpyruvate                                             | 1.04 | 0.42  | -0.08 | -1.45  | 40.16  | 0.56  | -0.52  | 0.94 | 8.55E+00 |
| butyrate/isobutyrate (4:0)                                          | 1.38 | 1.41  | -0.03 | -0.38  | 102.39 | 0.32  | -0.53  | 0.77 | 3.62E+01 |
| N-acetylneuraminate                                                 | 1.05 | 0.33  | 0.27  | 2.53   | 31.09  | 0.01  | -0.15  | 0.90 | 0.00E+00 |
| homovanillate (HVA)                                                 | 1.19 | 0.94  | 0.31  | 2.56   | 78.97  | 0.11  | -0.35  | 0.63 | 1.95E+01 |
| creatine                                                            | 1.11 | 0.48  | -0.47 | 0.20   | 43.74  | 0.00  | -0.12  | 0.98 | 0.00E+00 |
| cys-gly, oxidized                                                   | 1.23 | 0.99  | -0.75 | 0.82   | 80.59  | 0.12  | -0.36  | 0.84 | 1.13E+01 |
| 2,3-diphosphoglycerate                                              | 5.19 | 14.28 | 2.19  | 4.80   | 275.44 | 1.15  | 0.21   | 0.58 |          |
| estrone 3-sulfate                                                   | 1.87 | 3.14  | 1.72  | 3.02   | 168.15 | 1.15  | 0.21   | 0.61 | 9.53E+00 |
| dihomo-linoleate (20:2n6)                                           | 1.28 | 0.78  | -0.23 | -0.06  | 61.50  | 0.00  | -0.12  | 0.93 | 0.00E+00 |
| gamma-glutamylhistidine                                             | 1.36 | 1.38  | -0.20 | -0.56  | 101.72 | 0.26  | -0.50  | 0.78 | 1.36E+01 |
| 2-hydroxystearate                                                   | 1.05 | 0.28  | -0.19 | 0.07   | 26.99  | 0.00  | -0.12  | 0.99 | 0.00E+00 |
| N1-methyladenosine                                                  | 1.00 | 0.18  | -0.86 | 3.22   | 18.54  | 0.00  | -0.12  | 0.99 | 0.00E+00 |
| glycerol                                                            | 1.16 | 0.56  | 0.13  | -0.35  | 48.54  | 0.00  | -0.12  | 0.95 | 4.48E+00 |

Supplementary Table 1: Distribution of raw and transformed metabolites, the correlation between raw and transformed metabolite values, and coefficient of variation of raw metabolites

|                                             |       |        |       |        |        |      |       |         |          |
|---------------------------------------------|-------|--------|-------|--------|--------|------|-------|---------|----------|
| choline                                     | 1.03  | 0.22   | 0.04  | 0.04   | 21.01  | 0.00 | -0.12 | 0.99    | 2.64E+00 |
| anthranilate                                | 1.20  | 0.74   | 0.69  | -0.63  | 61.82  | 0.86 | -0.26 | 0.82    | 2.53E+01 |
| gamma-glutamylleucine                       | 1.42  | 1.21   | 1.89  | 3.92   | 84.98  | 0.00 | -0.12 | 0.72    | 0.00E+00 |
| 3-phosphoglycerate                          | 1.64  | 2.56   | 0.66  | 0.70   | 156.56 | 0.29 | -0.52 | 0.65    | 3.45E+01 |
| 3-methoxytyrosine                           | 1.08  | 0.33   | 0.28  | 0.48   | 30.71  | 0.00 | -0.12 | 0.95    | 1.55E+00 |
| cholate                                     | 3.28  | 6.78   | 0.57  | 0.07   | 206.97 | 0.05 | -0.24 | 0.68    | 0.00E+00 |
| fluoxetine                                  | 1.68  | 1.80   | 6.97  | 49.79  | 107.20 | 5.76 | 31.94 | 0.91    | 1.05E+01 |
| 4-acetamidophenol                           | 8.95  | 25.45  | 2.55  | 5.48   | 284.93 | 1.92 | 2.45  | 0.60    | 3.31E+01 |
| naproxen                                    | 5.39  | 16.89  | 3.18  | 9.10   | 313.72 | 2.84 | 6.78  | 0.54    | 3.87E+01 |
| topiramate                                  | 1.00  | 0.55   | 10.07 | 103.98 | 55.25  | 8.22 | 66.44 | 0.97    | 1.15E+02 |
| beta-hydroxyisovalerate                     | 1.13  | 0.50   | -0.16 | 1.01   | 44.47  | 0.00 | -0.12 | 0.93    | 0.00E+00 |
| ibuprofen                                   | 2.72  | 3.31   | 5.43  | 30.63  | 121.71 | 3.98 | 14.54 | 0.85    | 1.05E+02 |
| arachidonoyl ethanolamide                   | 1.34  | 1.11   | 0.83  | 1.85   | 82.35  | 0.25 | -0.49 | 0.71    |          |
| palmitoyl ethanolamide                      | 1.14  | 0.42   | 0.01  | 0.62   | 37.02  | 0.00 | -0.12 | 0.95    | 1.29E+00 |
| N-linoleoylglycine                          | 1.17  | 0.60   | -0.40 | -1.00  | 51.07  | 0.36 | -0.54 | 0.94    | 9.65E+00 |
| N-palmitoyl-sphingosine (d18:1/16:0)        | 1.02  | 0.24   | -0.03 | 0.16   | 23.79  | 0.00 | -0.12 | 0.98    | 0.00E+00 |
| 1-palmitoyl-2-oleoyl-GPE (16:0/18:1)        | 1.14  | 0.63   | 0.21  | 0.05   | 55.20  | 0.00 | -0.12 | 0.91    | 0.00E+00 |
| 1-palmitoyl-2-linoleoyl-GPI (16:0/18:2)     | 1.07  | 0.46   | -0.41 | 0.45   | 43.46  | 0.00 | -0.12 | 0.98    | 3.82E+00 |
| 1-palmitoyl-2-linoleoyl-GPC (16:0/18:2)     | 1.00  | 0.12   | -0.10 | -0.28  | 12.16  | 0.00 | -0.12 | 1.00    | 0.00E+00 |
| stearoyl sphingomyelin (d18:1/18:0)         | 1.03  | 0.26   | -0.15 | 0.11   | 25.04  | 0.00 | -0.12 | 0.99    | 0.00E+00 |
| 1-palmitoyl-2-oleoyl-GPC (16:0/18:1)        | 1.02  | 0.20   | 0.21  | 0.15   | 19.91  | 0.00 | -0.12 | 0.98    | 0.00E+00 |
| N-stearoyl-sphingosine (d18:1/18:0)*        | 1.03  | 0.37   | -0.39 | 0.63   | 35.79  | 0.00 | -0.12 | 0.98    | 0.00E+00 |
| 5,6-dihydrothymine                          | 1.06  | 0.32   | -0.31 | 0.81   | 30.24  | 0.01 | -0.15 | 0.98    | 0.00E+00 |
| glycochenodeoxycholate                      | 1.63  | 1.93   | 0.04  | -0.01  | 119.09 | 0.01 | -0.13 | 0.81    | 0.00E+00 |
| taurochenodeoxycholate                      | 2.17  | 3.78   | 0.21  | 0.07   | 174.64 | 0.06 | -0.26 | 0.70    | 0.00E+00 |
| taurocholate                                | 3.45  | 10.00  | 0.56  | -0.02  | 290.35 | 0.29 | -0.51 | 0.54    | 0.00E+00 |
| taurodeoxycholate                           | 2.07  | 3.44   | -0.45 | 0.41   | 166.56 | 0.12 | -0.36 | 0.68    | 0.00E+00 |
| hypoxanthine                                | 1.32  | 0.92   | 0.24  | 0.41   | 69.62  | 0.00 | -0.12 | 0.87    | 0.00E+00 |
| 9,10-DHOME                                  | 1.17  | 0.70   | -0.36 | 0.72   | 60.10  | 0.15 | -0.39 | 0.85    | 3.11E+01 |
| linoleate (18:2n6)                          | 1.16  | 0.59   | -0.49 | 0.21   | 51.16  | 0.00 | -0.12 | 0.97    | 0.00E+00 |
| laurate (12:0)                              | 1.40  | 1.12   | 0.13  | -0.26  | 79.96  | 0.00 | -0.12 | 0.89    | 0.00E+00 |
| quinolate                                   | 1.09  | 0.54   | 0.29  | 0.76   | 49.29  | 0.00 | -0.12 | 0.89    | 0.00E+00 |
| 2-hydroxyhippurate (salicylurate)           | 22.62 | 74.67  | 1.19  | 0.99   | 330.57 | 0.01 | -0.13 | 0.57    | 0.00E+00 |
| N6,N6,N6-trimethyllysine                    | 1.18  | 0.64   | 0.92  | 1.56   | 54.36  | 0.00 | -0.12 | 0.85    | 0.00E+00 |
| N-acetylputrescine                          | 1.07  | 0.45   | -0.56 | 7.08   | 41.77  | 0.00 | -0.12 | 0.85    | 0.00E+00 |
| N-formylmethionine                          | 1.01  | 0.21   | -0.14 | 1.27   | 20.86  | 0.00 | -0.12 | 0.98    | 0.00E+00 |
| 5-adenosylhomocysteine (SAH)                | 1.10  | 0.55   | 0.07  | 1.51   | 49.98  | 0.03 | -0.19 | 0.88    | 5.36E+00 |
| metoprolol                                  | 2.20  | 3.28   | 8.53  | 81.64  | 149.29 | 5.23 | 26.16 | 0.75    | 3.81E+01 |
| azelate (C9-DC)                             | 1.14  | 0.50   | 0.73  | 1.94   | 44.28  | 0.01 | -0.15 | 0.86    | 1.60E+01 |
| 3-(N-acetyl-L-cystein-S-yl) acetaminophen   | 3.48  | 5.11   | 2.71  | 6.03   | 146.92 | 2.26 | 3.83  | 0.83    | 0.00E+00 |
| 4-acetaminophen sulfate                     | 46.25 | 123.58 | 1.68  | 1.78   | 267.58 | 1.12 | 0.15  | 0.65    | 0.00E+00 |
| eicosapentaenoate (EPA; 20:5n3)             | 1.57  | 1.93   | 0.55  | 1.23   | 123.10 | 0.00 | -0.12 | 0.69    | 0.00E+00 |
| methylsuccinate                             | 1.12  | 0.94   | 1.32  | 6.83   | 84.02  | 0.00 | -0.12 | 0.56    | 2.28E+00 |
| ethylmalonate                               | 1.27  | 1.03   | 1.38  | 3.23   | 81.20  | 0.00 | -0.12 | 0.72    | 0.00E+00 |
| adenosine 3',5'-cyclic monophosphate (cAMP) | 1.01  | 0.23   | -0.78 | 1.75   | 22.53  | 0.01 | -0.15 | 1.00    | 1.64E+01 |
| adenosine 5'-monophosphate (AMP)            | 1.78  | 1.76   | 0.03  | -0.09  | 99.17  | 0.00 | -0.12 | 0.84    | 0.00E+00 |
| 5-methylthioadenosine (MTA)                 | 1.11  | 0.77   | 1.51  | 12.98  | 69.56  | 0.01 | -0.13 | 0.52    | 2.46E-07 |
| N6-methyladenosine                          | 0.99  | 0.28   | -0.40 | -0.15  | 28.86  | 0.00 | -0.12 | 0.99    | 9.06E+00 |
| arachidonate (20:4n6)                       | 1.12  | 0.42   | -0.25 | -0.12  | 37.61  | 0.00 | -0.12 | 0.98    | 0.00E+00 |
| arginine                                    | 1.03  | 0.26   | 0.29  | 1.03   | 25.02  | 0.00 | -0.12 | 0.96    | 3.84E+00 |
| aspartate                                   | 1.29  | 0.91   | 1.21  | 1.98   | 71.08  | 0.00 | -0.12 | 0.80    | 1.57E+00 |
| 2-hydroxyphenylacetate                      | 1.16  | 0.69   | -1.56 | 2.14   | 59.69  | 0.15 | -0.40 | 0.89    | 5.88E+00 |
| 3-(4-hydroxyphenyl)lactate                  | 1.06  | 0.38   | 0.04  | 0.30   | 36.31  | 0.00 | -0.12 | 0.96    | 0.00E+00 |
| phenylpyruvate                              | 1.00  | 0.35   | -0.36 | 0.47   | 35.36  | 0.06 | -0.26 | 0.95    | 1.05E+01 |
| beta-alanine                                | 1.29  | 4.30   | 4.69  | 56.25  | 334.80 | 0.01 | -0.13 | 0.22    | 0.00E+00 |
| biliverdin                                  | 1.29  | 0.98   | 0.19  | 0.59   | 75.53  | 0.00 | -0.12 | 0.86    | 1.71E+01 |
| succinate                                   | 1.04  | 0.49   | -2.61 | 6.27   | 47.19  | 0.00 | -0.12 | 0.94    | 0.00E+00 |
| 3-hydroxybutyrate (BHBA)                    | 2.09  | 3.11   | 0.55  | 0.22   | 148.81 | 0.00 | -0.12 | 0.72    | 0.00E+00 |
| cholesterol                                 | 1.02  | 0.23   | -0.40 | -0.18  | 22.09  | 0.00 | -0.12 | 1.00    | 0.00E+00 |
| corticosterone                              | 1.27  | 0.88   | 0.11  | -1.21  | 68.78  | 0.45 | -0.55 | 0.93    | 0.00E+00 |
| cortisone                                   | 0.97  | 0.27   | -4.29 | 27.64  | 27.36  | 0.01 | -0.15 | 1.00    | 3.63E-07 |
| creatinine                                  | 1.02  | 0.17   | 0.01  | 0.10   | 16.47  | 0.00 | -0.12 | 0.99    | 0.00E+00 |
| cysteinylglycine                            | 1.12  | 0.60   | -0.63 | 1.02   | 53.46  | 0.04 | -0.23 | 0.93    | 4.79E+00 |
| cystine                                     | 1.12  | 0.58   | 0.10  | -0.18  | 52.24  | 0.00 | -0.12 | 0.94    | 0.00E+00 |
| sphingosine                                 | 1.06  | 0.53   | 0.44  | 0.69   | 50.37  | 0.01 | -0.15 | 0.89    | 0.00E+00 |
| deoxycholate                                | 1.31  | 1.49   | -0.24 | 0.72   | 114.09 | 0.04 | -0.23 | 0.73    | 0.00E+00 |
| cystathionine                               | 1.28  | 1.42   | -0.35 | -0.42  | 111.17 | 0.32 | -0.53 | 0.63    | 0.00E+00 |
| sphinganine                                 | 1.04  | 0.51   | 0.54  | 0.85   | 48.46  | 0.00 | -0.12 | 0.89    | 5.01E+00 |
| flavin adenine dinucleotide (FAD)           | 1.03  | 0.25   | 0.00  | -1.35  | 24.45  | 0.49 | -0.54 | 0.99    | 6.02E+00 |
| fumarate                                    | 1.07  | 0.33   | 0.42  | 1.59   | 30.84  | 0.00 | -0.12 | 0.92    | 1.93E+00 |
| gamma-glutamylglutamate                     | 2.64  | 5.47   | 1.56  | 3.32   | 207.21 | 0.03 | -0.19 | 0.61    | 5.38E+00 |
| gluconate                                   | 1.07  | 0.37   | -0.03 | 2.54   | 34.14  | 0.00 | -0.12 | 0.93    | 0.00E+00 |
| glutarate (C5-DC)                           | 1.74  | 2.11   | 0.14  | 2.01   | 121.53 | 0.02 | -0.16 | 0.73    | 0.00E+00 |
| glycine                                     | 1.05  | 0.30   | 0.21  | 0.20   | 28.47  | 0.00 | -0.12 | 0.97    | 0.00E+00 |
| glycocholate                                | 2.28  | 4.39   | 0.49  | 0.32   | 192.87 | 0.00 | -0.12 | 0.63    | 0.00E+00 |
| guanidinoacetate                            | 1.04  | 0.28   | -0.24 | 1.40   | 27.34  | 0.00 | -0.12 | 0.98    | 0.00E+00 |
| 5-1-pyrroline-5-carboxylate                 | 1.01  | 0.42   | -0.55 | 0.52   | 41.26  | 0.07 | -0.28 | 0.96    | 3.24E+00 |
| histidine                                   | 0.99  | 0.14   | -0.04 | -0.32  | 13.73  | 0.00 | -0.12 | 1.00    | 0.00E+00 |
| cortisol                                    | 1.02  | 0.37   | -1.12 | 4.33   | 36.35  | 0.00 | -0.12 | 0.99    | 0.00E+00 |
| hypotaurine                                 | 1.06  | 0.48   | -0.33 | 0.68   | 45.38  | 0.01 | -0.15 | 0.94    | 0.00E+00 |
| inosine                                     | 1.21  | 0.66   | 0.07  | 1.02   | 54.91  | 0.10 | -0.32 | 0.86    | 1.17E+01 |
| myo-inositol                                | 1.03  | 0.29   | -0.04 | -0.23  | 28.43  | 0.00 | -0.12 | 0.98    | 2.80E+00 |
| isoleucine                                  | 1.03  | 0.21   | 0.01  | -0.15  | 20.43  | 0.00 | -0.12 | 0.99    | 5.06E-08 |
| 2-aminoadipate                              | 1.07  | 0.55   | -1.70 | 3.07   | 51.42  | 0.08 | -0.30 | 0.97    | 0.00E+00 |
| citrulline                                  | 1.02  | 0.26   | -0.23 | 0.24   | 25.66  | 0.00 | -0.12 | 0.99    | 7.62E-01 |
| leucine                                     | 1.02  | 0.18   | 0.00  | -0.30  | 17.84  | 0.00 | -0.12 | 0.99    | 0.00E+00 |
| lithocholate                                | 1.66  | 2.01   | 0.78  | -0.37  | 121.11 | 0.67 | -0.45 | 0.77    | 6.27E+00 |
| lysine                                      | 1.01  | 0.17   | -0.42 | 0.95   | 17.18  | 0.00 | -0.12 | 1.00    | 0.00E+00 |
| malate                                      | 1.06  | 0.27   | 0.90  | 2.14   | 25.23  | 0.00 | -0.12 | 0.91 NA |          |
| methionine                                  | 1.01  | 0.17   | -0.79 | 2.76   | 16.39  | 0.00 | -0.12 | 0.99    | 0.00E+00 |
| methylmalonate (MMA)                        | 1.07  | 0.51   | -2.22 | 3.89   | 47.82  | 0.13 | -0.38 | 0.93 NA |          |
| palmitate (16:0)                            | 1.13  | 0.52   | -0.34 | 0.05   | 45.87  | 0.00 | -0.12 | 0.96    | 2.69E+00 |
| nicotinamide                                | 1.21  | 0.70   | 0.25  | 1.50   | 57.85  | 0.01 | -0.13 | 0.85    | 1.30E+01 |
| stearate (18:0)                             | 1.19  | 0.55   | -0.17 | -0.13  | 45.92  | 0.00 | -0.12 | 0.96    | 4.11E+00 |
| ornithine                                   | 1.01  | 0.23   | -0.60 | 1.17   | 22.33  | 0.00 | -0.12 | 1.00    | 2.73E+00 |
| orotate                                     | 1.09  | 0.70   | 1.53  | 8.13   | 64.26  | 0.00 | -0.12 | 0.63    | 0.00E+00 |
| palmitoleate (16:1n7)                       | 1.54  | 1.45   | -0.17 | -0.23  | 94.78  | 0.00 | -0.12 | 0.86    | 0.00E+00 |
| phenylalanine                               | 1.02  | 0.16   | 0.35  | 0.78   | 15.56  | 0.00 | -0.12 | 0.98    | 8.77E-01 |
| phosphate                                   | 0.99  | 0.16   | -0.04 | 0.21   | 15.71  | 0.00 | -0.12 | 0.99    | 5.16E-01 |
| phytanate                                   | 1.35  | 1.34   | -0.02 | 0.48   | 98.95  | 0.00 | -0.12 | 0.75    | 0.00E+00 |
| proline                                     | 1.05  | 0.29   | 0.39  | 0.04   | 27.52  | 0.00 | -0.12 | 0.96    | 1.34E+00 |
| lactate                                     | 1.12  | 0.41   | 0.10  | 0.25   | 36.83  | 0.00 | -0.12 | 0.96    | 0.00E+00 |
| pyridoxal                                   | 1.38  | 1.61   | 2.03  | 3.57   | 116.97 | 1.71 | 1.69  | 0.71    | 8.26E+00 |
| retinol (Vitamin A)                         | 0.99  | 0.32   | -2.10 | 7.73   | 31.90  | 0.00 | -0.12 | 1.00    | 1.58E+00 |
| spermidine                                  | 1.27  | 1.21   | 0.54  | 3.22   | 95.57  | 0.06 | -0.27 | 0.65    | 6.08E+00 |
| salicylate                                  | 21.12 | 78.16  | 1.23  | 1.07   | 370.61 | 0.00 | -0.12 | 0.53    | 5.84E+00 |
| serine                                      | 1.03  | 0.21   | -0.31 | 0.52   | 20.83  | 0.00 | -0.12 | 0.99    | 0.00E+00 |

Supplementary Table 1: Distribution of raw and transformed metabolites, the correlation between raw and transformed metabolite values, and coefficient of variation of raw metabolites

|                                      |       |        |       |       |         |      |       |         |          |
|--------------------------------------|-------|--------|-------|-------|---------|------|-------|---------|----------|
| serotonin                            | 1.51  | 1.32   | 0.00  | -1.13 | 87.24   | 0.37 | -0.54 | 0.89    | 0.00E+00 |
| taurine                              | 1.04  | 0.24   | 0.33  | 0.02  | 23.18   | 0.00 | -0.12 | 0.97    | 0.00E+00 |
| myristate (14:0)                     | 1.32  | 0.89   | -0.21 | -0.10 | 67.65   | 0.00 | -0.12 | 0.92    | 0.00E+00 |
| urea                                 | 1.03  | 0.35   | -0.37 | 1.10  | 34.38   | 0.00 | -0.12 | 0.97    | 0.00E+00 |
| uridine                              | 1.01  | 0.20   | -0.62 | 1.31  | 19.39   | 0.00 | -0.12 | 1.00    | 0.00E+00 |
| 2'-deoxyuridine                      | 1.05  | 0.30   | -0.51 | 0.34  | 28.64   | 0.02 | -0.18 | 0.99    | 3.94E+00 |
| trans-urocanate                      | 1.39  | 0.84   | -0.16 | -0.43 | 60.45   | 0.00 | -0.12 | 0.94    | 8.29E+00 |
| 1-methylnicotinamide                 | 1.23  | 2.12   | 1.26  | 7.05  | 172.27  | 0.00 | -0.12 | 0.44    | 0.00E+00 |
| glutamate                            | 1.41  | 1.22   | 1.17  | 1.60  | 87.08   | 0.00 | -0.12 | 0.78    | 0.00E+00 |
| glutamine                            | 0.96  | 0.20   | -3.30 | 14.69 | 21.19   | 0.00 | -0.12 | 0.94    | 6.56E-01 |
| threonine                            | 1.03  | 0.22   | 0.11  | -0.25 | 21.62   | 0.00 | -0.12 | 0.98    | 0.00E+00 |
| tryptophan                           | 1.01  | 0.21   | -0.34 | 1.16  | 20.62   | 0.00 | -0.12 | 0.99    | 2.30E-02 |
| valine                               | 1.01  | 0.21   | 0.06  | 0.17  | 20.73   | 0.00 | -0.12 | 0.98    | 0.00E+00 |
| glucose                              | 1.02  | 0.12   | 0.07  | 0.00  | 12.11   | 0.00 | -0.12 | 0.99    | 5.87E-01 |
| 12,13-DiHOME                         | 1.19  | 0.73   | -0.42 | 0.74  | 62.08   | 0.09 | -0.31 | 0.90    | 1.03E+01 |
| alpha-ketobutyrate                   | 1.10  | 0.49   | -1.27 | 1.81  | 44.45   | 0.10 | -0.32 | 0.96    | 0.00E+00 |
| betaine                              | 1.04  | 0.25   | 0.28  | 0.30  | 24.20   | 0.00 | -0.12 | 0.97    | 0.00E+00 |
| cysteine                             | 1.03  | 0.39   | -1.22 | 4.23  | 37.94   | 0.00 | -0.12 | 0.95    | 6.67E+00 |
| mannose                              | 1.04  | 0.26   | -0.07 | 0.17  | 25.11   | 0.00 | -0.12 | 0.98    | 0.00E+00 |
| dimethylglycine                      | 1.10  | 0.43   | 0.69  | 1.84  | 39.67   | 0.00 | -0.12 | 0.88    | 0.00E+00 |
| alanine                              | 1.04  | 0.29   | 0.14  | -0.51 | 27.55   | 0.00 | -0.12 | 0.98    | 2.27E+00 |
| tyrosine                             | 1.02  | 0.20   | -0.11 | -0.07 | 19.76   | 0.00 | -0.12 | 0.99    | 0.00E+00 |
| pseudouridine                        | 1.01  | 0.19   | 0.27  | 1.26  | 19.06   | 0.00 | -0.12 | 0.97    | 1.03E-07 |
| pyruvate                             | 1.08  | 0.48   | -2.48 | 7.23  | 44.74   | 0.00 | -0.12 | 0.99    | 0.00E+00 |
| uracil                               | 1.03  | 0.32   | -0.45 | 1.63  | 31.32   | 0.03 | -0.20 | 0.95    | 7.02E+00 |
| xylose                               | 1.00  | 0.41   | 0.13  | -1.63 | 40.67   | 0.70 | -0.43 | 0.95    | 5.93E+00 |
| cytidine                             | 1.14  | 0.59   | 0.19  | 1.48  | 51.42   | 0.03 | -0.20 | 0.86    | 1.63E+01 |
| arabinose                            | 1.07  | 0.50   | -0.26 | -1.65 | 46.76   | 0.55 | -0.52 | 0.96    | 4.15E-01 |
| cotinine                             | 1.72  | 2.59   | 1.86  | 1.78  | 150.66  | 1.76 | 1.85  | 0.80    | 4.10E+01 |
| caffeine                             | 1.88  | 3.02   | -0.52 | -0.18 | 160.73  | 0.13 | -0.37 | 0.72    | 0.00E+00 |
| fructose                             | 1.04  | 0.25   | 0.32  | 0.87  | 24.14   | 0.00 | -0.12 | 0.96    | 0.00E+00 |
| adenine                              | 1.06  | 0.44   | -0.42 | 0.39  | 41.91   | 0.13 | -0.37 | 0.91    | 1.07E+01 |
| cytosine                             | 1.40  | 1.09   | 1.32  | 0.62  | 78.20   | 1.16 | 0.23  | 0.87    | 0.00E+00 |
| caprate (10:0)                       | 1.36  | 1.17   | 0.46  | 0.57  | 86.41   | 0.00 | -0.12 | 0.80    | 0.00E+00 |
| margarate (17:0)                     | 1.23  | 0.68   | -0.18 | 0.10  | 55.73   | 0.00 | -0.12 | 0.94    | 0.00E+00 |
| nonadecanoate (19:0)                 | 1.14  | 0.46   | 0.09  | -0.05 | 40.62   | 0.00 | -0.12 | 0.95    | 0.00E+00 |
| arachidate (20:0)                    | 1.20  | 0.56   | 0.77  | 0.81  | 47.13   | 0.00 | -0.12 | 0.89    | 9.72E-01 |
| maltose                              | 1.54  | 1.34   | -0.47 | 0.53  | 87.46   | 0.09 | -0.31 | 0.86    | 0.00E+00 |
| asparagine                           | 0.99  | 0.16   | -0.31 | 1.01  | 16.32   | 0.00 | -0.12 | 0.99    | 0.00E+00 |
| N-stearoyl-sphinganine (d18:0/18:0)* | 1.18  | 0.75   | 0.08  | 0.30  | 63.42   | 0.00 | -0.12 | 0.87 NA |          |
| dihydroorotate                       | 1.00  | 0.62   | -0.74 | -0.49 | 61.89   | 0.20 | -0.45 | 0.97    | 9.20E+00 |
| alpha-ketoglutarate                  | 1.00  | 0.33   | -3.38 | 14.80 | 33.09   | 0.00 | -0.12 | 0.95    | 0.00E+00 |
| caprylate (8:0)                      | 1.33  | 1.26   | 0.45  | 0.64  | 94.73   | 0.39 | -0.54 | 0.67    | 4.44E+00 |
| sucrose                              | 46.55 | 755.96 | 0.56  | 4.74  | 1626.51 | 0.24 | -0.49 | 0.17    | 2.62E+01 |
| kynurenate                           | 1.06  | 0.38   | 0.18  | 0.47  | 35.94   | 0.00 | -0.12 | 0.95    | 0.00E+00 |
| pentadecanoate (15:0)                | 1.20  | 0.62   | -0.21 | -0.11 | 51.98   | 0.00 | -0.12 | 0.96    | 0.00E+00 |
| X-07765                              | 1.64  | 1.75   | -1.17 | 1.61  | 107.24  | 0.00 | -0.12 | 0.89    | 0.00E+00 |
| X-10458                              | 1.18  | 0.90   | 0.48  | 2.41  | 76.22   | 0.03 | -0.19 | 0.73    | 6.03E+00 |
| X-11299                              | 1.35  | 1.35   | -0.64 | 1.18  | 100.36  | 0.00 | -0.12 | 0.87    | 2.13E+00 |
| X-11308                              | 1.08  | 0.55   | -0.55 | 1.25  | 50.81   | 0.00 | -0.12 | 0.95    | 0.00E+00 |
| X-11315                              | 1.10  | 0.57   | 0.09  | 0.24  | 51.71   | 0.00 | -0.12 | 0.93    | 0.00E+00 |
| X-11372                              | 1.08  | 0.50   | -0.95 | 3.36  | 46.08   | 0.00 | -0.12 | 0.97    | 0.00E+00 |
| X-11381                              | 1.05  | 0.36   | -1.13 | 3.02  | 34.18   | 0.00 | -0.12 | 0.99    | 1.34E+00 |
| X-11444                              | 1.09  | 0.55   | -1.86 | 9.17  | 50.42   | 0.01 | -0.13 | 0.95    | 0.00E+00 |
| X-11470                              | 1.09  | 0.60   | -0.79 | 1.20  | 54.91   | 0.03 | -0.19 | 0.96    | 0.00E+00 |
| X-11478                              | 1.15  | 0.70   | -0.33 | 0.12  | 60.78   | 0.00 | -0.12 | 0.94    | 0.00E+00 |
| X-11483                              | 1.53  | 2.09   | -0.14 | 0.54  | 136.74  | 0.01 | -0.13 | 0.73    | 0.00E+00 |
| X-11632                              | 1.21  | 0.94   | 1.21  | 3.30  | 77.99   | 0.02 | -0.16 | 0.73    | 1.45E+01 |
| X-11787                              | 1.00  | 0.24   | -0.06 | 2.35  | 24.19   | 0.00 | -0.12 | 0.96    | 3.37E-07 |
| X-11795                              | 1.55  | 2.56   | -1.11 | 1.17  | 165.57  | 0.16 | -0.41 | 0.59    | 0.00E+00 |
| X-11843                              | 4.29  | 8.46   | -0.12 | -0.83 | 197.55  | 0.18 | -0.43 | 0.73    | 3.05E+01 |
| X-11847                              | 3.26  | 6.53   | -0.07 | -1.09 | 200.28  | 0.29 | -0.51 | 0.71    | 0.00E+00 |
| X-11849                              | 2.52  | 4.62   | -0.19 | -1.08 | 183.33  | 0.31 | -0.52 | 0.72    | 0.00E+00 |
| X-11850                              | 4.47  | 9.60   | -0.02 | -0.81 | 215.16  | 0.08 | -0.30 | 0.70    | 2.71E+01 |
| X-11852                              | 4.52  | 10.49  | 0.12  | -0.52 | 232.13  | 0.02 | -0.16 | 0.65    | 0.00E+00 |
| X-11858                              | 4.21  | 12.43  | 0.67  | -0.80 | 295.68  | 0.77 | -0.37 | 0.56    | 0.00E+00 |
| X-11880                              | 1.09  | 0.49   | -0.58 | 0.88  | 45.46   | 0.00 | -0.12 | 0.98    | 1.60E+00 |
| X-11979                              | 1.05  | 0.35   | -0.34 | 0.20  | 33.06   | 0.12 | -0.36 | 0.96    | 2.56E+01 |
| X-12007                              | 1.54  | 2.15   | -0.11 | 0.34  | 140.19  | 0.04 | -0.23 | 0.68    | 0.00E+00 |
| X-12013                              | 2.87  | 5.83   | 0.38  | -0.63 | 203.05  | 0.36 | -0.54 | 0.65    | 0.00E+00 |
| X-12026                              | 1.05  | 0.36   | -0.24 | 0.93  | 34.67   | 0.00 | -0.12 | 0.97    | 0.00E+00 |
| X-12027                              | 3.11  | 6.45   | 2.63  | 7.26  | 207.48  | 1.54 | 1.18  | 0.66    |          |
| X-12100                              | 1.08  | 0.37   | 1.29  | 3.91  | 34.33   | 0.00 | -0.12 | 0.84    | 3.34E+00 |
| X-12101                              | 1.22  | 0.87   | 0.21  | 0.20  | 70.99   | 0.00 | -0.12 | 0.88    | 0.00E+00 |
| X-12104                              | 1.02  | 0.31   | 0.02  | 0.17  | 30.63   | 0.00 | -0.12 | 0.97    | 0.00E+00 |
| X-12111                              | 1.77  | 2.33   | 0.82  | -0.52 | 131.98  | 0.85 | -0.27 | 0.76    |          |
| X-12193                              | 1.13  | 0.52   | -0.32 | 0.18  | 46.49   | 0.11 | -0.35 | 0.94    | 3.36E+01 |
| X-12216                              | 1.32  | 1.12   | -0.53 | 0.26  | 85.03   | 0.05 | -0.24 | 0.91    | 0.00E+00 |
| X-12221                              | 1.62  | 2.04   | 1.35  | 1.13  | 126.45  | 1.00 | -0.06 | 0.74    | 0.00E+00 |
| X-12261                              | 2.34  | 3.57   | 0.49  | -1.09 | 152.72  | 0.58 | -0.51 | 0.78    | 2.44E+01 |
| X-12262                              | 1.76  | 2.29   | 1.14  | -0.04 | 130.14  | 1.13 | 0.18  | 0.78    | 3.41E+01 |
| X-12306                              | 1.38  | 1.44   | -0.07 | -1.05 | 104.85  | 0.37 | -0.54 | 0.82    | 0.00E+00 |
| X-12407                              | 1.53  | 1.59   | 0.39  | -1.06 | 104.12  | 0.59 | -0.50 | 0.83    | 0.00E+00 |
| X-12410                              | 1.28  | 0.99   | -0.51 | 0.02  | 77.45   | 0.20 | -0.45 | 0.87    | 0.00E+00 |
| X-12411                              | 1.24  | 1.74   | 0.81  | 3.76  | 139.97  | 0.00 | -0.12 | 0.49    | 0.00E+00 |
| X-12456                              | 1.38  | 1.14   | -0.20 | -0.75 | 82.94   | 0.20 | -0.45 | 0.90    | 1.24E+01 |
| X-12544                              | 13.92 | 58.29  | 1.94  | 3.90  | 419.46  | 0.05 | -0.25 | 0.49    | 0.00E+00 |
| X-12680                              | 1.20  | 0.83   | 0.10  | 0.54  | 69.13   | 0.02 | -0.16 | 0.87    | 2.80E-06 |
| X-12701                              | 1.54  | 2.36   | 2.59  | 7.54  | 153.83  | 1.72 | 1.74  | 0.58    | 0.00E+00 |
| X-12707                              | 1.19  | 0.83   | 0.14  | 1.16  | 70.03   | 0.03 | -0.19 | 0.77    | 1.29E+01 |
| X-12714                              | 1.27  | 1.25   | 1.41  | 1.74  | 98.18   | 0.99 | -0.08 | 0.70    | 1.85E+01 |
| X-12726                              | 1.64  | 2.29   | 0.22  | -0.04 | 140.10  | 0.20 | -0.45 | 0.72    | 2.17E+01 |
| X-12729                              | 1.81  | 3.64   | 0.25  | 1.04  | 201.61  | 0.04 | -0.21 | 0.53    | 0.00E+00 |
| X-12730                              | 4.45  | 9.09   | 1.77  | 2.61  | 204.79  | 1.03 | -0.01 | 0.69    | 0.00E+00 |
| X-12731                              | 1.15  | 0.80   | 0.86  | -0.34 | 69.86   | 0.77 | -0.37 | 0.88    | 0.00E+00 |
| X-12738                              | 2.47  | 3.38   | 1.92  | 2.82  | 137.14  | 1.42 | 0.83  | 0.80    | 0.00E+00 |
| X-12740                              | 2.71  | 4.77   | -0.16 | -0.96 | 176.42  | 0.28 | -0.51 | 0.75    | 0.00E+00 |
| X-12798                              | 1.09  | 0.62   | -1.32 | 1.30  | 57.37   | 0.13 | -0.38 | 0.95    | 5.23E+00 |
| X-12812                              | 1.59  | 2.92   | 0.05  | 0.34  | 183.30  | 0.12 | -0.36 | 0.59    | 0.00E+00 |
| X-12815                              | 2.52  | 3.78   | 2.12  | 3.77  | 150.12  | 1.71 | 1.69  | 0.75    | 0.00E+00 |
| X-12816                              | 1.25  | 1.20   | 0.39  | -1.59 | 95.81   | 0.83 | -0.30 | 0.91    | 0.00E+00 |
| X-12822                              | 1.12  | 0.65   | -0.08 | 0.57  | 57.70   | 0.00 | -0.12 | 0.91    | 2.94E+00 |
| X-12830                              | 1.54  | 1.72   | -0.10 | -1.30 | 112.24  | 0.41 | -0.55 | 0.85    | 0.00E+00 |
| X-12839                              | 1.48  | 1.43   | -0.10 | -0.97 | 97.09   | 0.35 | -0.54 | 0.85    | 1.40E+01 |
| X-12844                              | 1.01  | 0.41   | -3.02 | 20.18 | 40.43   | 0.01 | -0.13 | 0.98    | 0.00E+00 |
| X-12847                              | 2.40  | 3.89   | -0.31 | 0.27  | 162.24  | 0.04 | -0.21 | 0.74    | 0.00E+00 |
| X-12849                              | 1.69  | 2.67   | -0.67 | 1.24  | 158.38  | 0.04 | -0.23 | 0.66    |          |

Supplementary Table 1: Distribution of raw and transformed metabolites, the correlation between raw and transformed metabolite values, and coefficient of variation of raw metabolites

|         |       |       |       |       |        |      |       |         |          |
|---------|-------|-------|-------|-------|--------|------|-------|---------|----------|
| X-12851 | 2.00  | 3.02  | -0.48 | -0.31 | 151.15 | 0.19 | -0.44 | 0.76    | 0.00E+00 |
| X-12906 | 1.01  | 0.40  | -0.03 | 0.47  | 39.21  | 0.00 | -0.12 | 0.95    | 7.68E+00 |
| X-13431 | 1.14  | 0.65  | 0.10  | 0.94  | 57.13  | 0.01 | -0.13 | 0.88    | 0.00E+00 |
| X-13507 | 1.25  | 1.04  | 0.21  | -1.16 | 82.90  | 0.63 | -0.48 | 0.80    | 1.07E+01 |
| X-13553 | 1.12  | 0.56  | 0.31  | 0.34  | 49.96  | 0.01 | -0.15 | 0.91    | 0.00E+00 |
| X-13658 | 6.66  | 49.59 | 1.52  | 4.49  | 746.16 | 0.71 | -0.42 | 0.29    | 0.00E+00 |
| X-13695 | 1.42  | 1.47  | 1.00  | 0.32  | 103.83 | 0.77 | -0.37 | 0.76    | 1.46E+01 |
| X-13723 | 1.38  | 1.69  | 1.43  | 1.05  | 122.95 | 1.33 | 0.60  | 0.71    |          |
| X-13726 | 1.90  | 2.65  | 0.82  | -0.16 | 139.87 | 0.63 | -0.48 | 0.72    | 2.71E+01 |
| X-13728 | 1.35  | 1.33  | -1.11 | 1.18  | 98.93  | 0.07 | -0.28 | 0.89    | 0.00E+00 |
| X-13729 | 1.21  | 0.82  | -0.83 | 1.30  | 67.93  | 0.06 | -0.27 | 0.91    | 2.74E+00 |
| X-13844 | 1.52  | 1.78  | -0.01 | -0.69 | 117.22 | 0.21 | -0.46 | 0.84    | 4.87E+00 |
| X-13846 | 1.78  | 1.87  | 3.53  | 12.32 | 105.48 | 2.71 | 6.04  | 0.86    | 1.64E-06 |
| X-13866 | 1.46  | 1.33  | 0.24  | -0.27 | 91.80  | 0.00 | -0.12 | 0.86    | 3.48E-07 |
| X-14056 | 1.28  | 0.85  | 0.04  | -0.10 | 66.24  | 0.00 | -0.12 | 0.92    | 3.09E+00 |
| X-14939 | 1.09  | 0.56  | -0.21 | 0.45  | 51.42  | 0.00 | -0.12 | 0.95    | 0.00E+00 |
| X-15486 | 1.17  | 0.73  | -0.46 | 0.93  | 62.42  | 0.00 | -0.12 | 0.94    | 0.00E+00 |
| X-15503 | 1.07  | 0.39  | -0.02 | -0.22 | 36.59  | 0.00 | -0.12 | 0.97    | 0.00E+00 |
| X-15728 | 2.33  | 4.51  | -0.13 | -0.25 | 193.88 | 0.10 | -0.33 | 0.69    | 0.00E+00 |
| X-16087 | 1.19  | 0.78  | -1.26 | 1.98  | 65.70  | 0.11 | -0.35 | 0.91    | 7.71E+00 |
| X-16124 | 26.13 | 72.50 | 1.12  | 0.53  | 277.88 | 0.41 | -0.55 | 0.64    | 1.95E+01 |
| X-16397 | 1.08  | 0.51  | -0.58 | -0.80 | 47.57  | 0.28 | -0.51 | 0.97    | 0.00E+00 |
| X-16576 | 1.18  | 0.93  | -1.04 | 0.31  | 79.07  | 0.27 | -0.50 | 0.69    | 1.39E+01 |
| X-16580 | 1.12  | 0.60  | -0.40 | 0.17  | 53.72  | 0.01 | -0.15 | 0.96    | 3.06E+00 |
| X-16649 | 5.85  | 13.87 | 1.45  | 1.10  | 237.44 | 1.07 | 0.07  | 0.65    | 4.95E+01 |
| X-16935 | 1.24  | 0.95  | -0.57 | 0.44  | 76.68  | 0.01 | -0.13 | 0.93    | 0.00E+00 |
| X-16964 | 0.97  | 0.30  | -1.68 | 4.32  | 30.88  | 0.02 | -0.18 | 1.00    | 2.45E+01 |
| X-17010 | 1.77  | 4.09  | 1.72  | 3.71  | 231.80 | 0.00 | -0.12 | 0.57    | 0.00E+00 |
| X-17146 | 1.73  | 3.25  | 0.26  | -1.54 | 187.92 | 0.07 | -0.28 | 0.76    | 7.93E+01 |
| X-17162 | 2.19  | 4.14  | 0.89  | -0.10 | 189.61 | 0.76 | -0.37 | 0.62    | 2.85E+01 |
| X-17301 | 1.23  | 1.13  | 2.18  | 3.26  | 91.70  | 2.20 | 3.59  | 0.86 NA |          |
| X-17306 | 1.85  | 2.50  | 5.13  | 27.69 | 135.57 | 4.34 | 17.62 | 0.77 NA |          |
| X-17325 | 1.93  | 2.34  | 0.13  | -0.96 | 121.40 | 0.29 | -0.51 | 0.84    | 1.63E+01 |
| X-17335 | 1.05  | 0.45  | -0.43 | 0.13  | 43.01  | 0.01 | -0.13 | 0.98    | 2.77E+00 |
| X-17346 | 1.49  | 1.79  | 0.64  | 0.50  | 120.25 | 0.20 | -0.45 | 0.72    | 1.36E+01 |
| X-17348 | 2.48  | 4.52  | 1.58  | 1.57  | 182.20 | 1.29 | 0.53  | 0.68    | 0.00E+00 |
| X-17351 | 1.34  | 1.23  | -0.06 | 0.31  | 92.27  | 0.02 | -0.16 | 0.85    | 0.00E+00 |
| X-17353 | 1.42  | 1.58  | 0.73  | -0.50 | 111.16 | 0.79 | -0.34 | 0.74    | 2.20E+00 |
| X-17354 | 2.57  | 5.27  | 0.83  | -0.14 | 205.15 | 0.62 | -0.49 | 0.63    | 0.00E+00 |
| X-17357 | 1.06  | 0.49  | -1.78 | 4.69  | 46.14  | 0.07 | -0.28 | 0.95    | 0.00E+00 |
| X-17365 | 1.44  | 1.74  | 0.39  | -0.94 | 121.25 | 0.59 | -0.50 | 0.74    | 0.00E+00 |
| X-17367 | 1.77  | 2.06  | 0.35  | -1.04 | 116.95 | 0.50 | -0.54 | 0.84    | 3.02E+01 |
| X-17438 | 1.51  | 1.64  | -0.12 | 0.24  | 108.74 | 0.06 | -0.27 | 0.82    | 6.12E+00 |
| X-17612 | 1.23  | 0.94  | -0.63 | -0.21 | 76.80  | 0.19 | -0.44 | 0.89    | 2.97E+01 |
| X-17653 | 1.05  | 0.45  | -0.47 | 1.19  | 42.71  | 0.00 | -0.12 | 0.97    | 4.51E+00 |
| X-17654 | 1.10  | 0.52  | -0.42 | -0.98 | 47.29  | 0.36 | -0.54 | 0.94    | 2.11E+01 |
| X-17655 | 3.14  | 5.24  | 2.36  | 4.52  | 166.90 | 2.10 | 3.16  | 0.78    | 2.28E-05 |
| X-17676 | 1.09  | 0.47  | -0.03 | -0.25 | 43.13  | 0.00 | -0.12 | 0.97    | 0.00E+00 |
| X-17682 | 1.13  | 0.59  | 0.97  | -0.33 | 52.59  | 0.95 | -0.14 | 0.94    |          |
| X-17685 | 3.30  | 6.53  | 0.39  | -0.65 | 198.26 | 0.33 | -0.53 | 0.69    | 1.92E+01 |
| X-17686 | 1.88  | 2.80  | 2.12  | 4.26  | 149.13 | 1.44 | 0.89  | 0.72    | 1.14E+01 |
| X-17690 | 2.81  | 4.88  | -0.12 | -0.55 | 174.07 | 0.11 | -0.34 | 0.74    | 0.00E+00 |
| X-17692 | 2.46  | 4.17  | 2.14  | 4.02  | 169.85 | 1.53 | 1.14  | 0.66    | 5.45E+01 |
| X-17735 | 1.19  | 0.73  | -0.06 | -1.30 | 62.05  | 0.46 | -0.54 | 0.93    | 1.38E+01 |
| X-17761 | 1.10  | 0.67  | -0.37 | -1.02 | 60.78  | 0.35 | -0.54 | 0.93    | 4.79E+00 |
| X-17765 | 1.62  | 1.98  | 3.69  | 14.52 | 122.94 | 2.67 | 5.82  | 0.76 NA |          |
| X-18240 | 3.29  | 5.36  | 3.16  | 9.90  | 162.97 | 2.23 | 3.71  | 0.75 NA |          |
| X-18345 | 1.49  | 1.46  | 0.88  | 0.65  | 98.11  | 0.01 | -0.13 | 0.77    | 2.18E+01 |
| X-18779 | 0.93  | 0.32  | -2.36 | 9.09  | 34.44  | 0.02 | -0.16 | 0.99    | 3.72E+00 |
| X-18838 | 1.22  | 0.72  | 0.45  | -0.69 | 59.42  | 0.60 | -0.50 | 0.82    |          |
| X-18886 | 1.10  | 0.53  | -0.14 | -0.10 | 48.34  | 0.01 | -0.15 | 0.96    | 0.00E+00 |
| X-18887 | 1.10  | 0.49  | -0.28 | 0.98  | 44.97  | 0.01 | -0.13 | 0.95    | 0.00E+00 |
| X-18888 | 1.32  | 1.19  | -0.16 | -0.31 | 90.47  | 0.24 | -0.48 | 0.81    | 1.92E+01 |
| X-18899 | 1.10  | 0.71  | -0.15 | 2.61  | 64.71  | 0.01 | -0.13 | 0.76    | 1.60E+01 |
| X-18901 | 2.00  | 3.58  | 0.44  | 0.37  | 179.41 | 0.00 | -0.12 | 0.67    | 0.00E+00 |
| X-18913 | 1.14  | 0.66  | 0.60  | 1.96  | 58.36  | 0.00 | -0.12 | 0.83    | 0.00E+00 |
| X-18921 | 1.13  | 0.67  | -0.30 | -0.03 | 58.89  | 0.00 | -0.12 | 0.95    | 0.00E+00 |
| X-18922 | 1.06  | 0.46  | -0.19 | 0.28  | 43.74  | 0.00 | -0.12 | 0.95    | 0.00E+00 |
| X-18935 | 1.22  | 0.85  | 0.69  | -0.84 | 70.33  | 0.82 | -0.31 | 0.90    | 1.44E+01 |
| X-19141 | 1.06  | 0.54  | -0.38 | -0.13 | 50.98  | 0.00 | -0.12 | 0.97    | 0.00E+00 |
| X-19183 | 1.88  | 2.40  | 2.26  | 4.10  | 127.44 | 1.76 | 1.85  | 0.81    | 2.17E+01 |
| X-19299 | 2.22  | 3.82  | -0.44 | -0.49 | 172.68 | 0.27 | -0.50 | 0.69    | 3.16E+01 |
| X-19438 | 1.21  | 0.71  | -1.01 | -0.46 | 58.84  | 0.31 | -0.52 | 0.94    | 0.00E+00 |
| X-21258 | 1.51  | 2.77  | -0.11 | 1.53  | 183.05 | 0.00 | -0.12 | 0.55    | 0.00E+00 |
| X-21286 | 1.15  | 0.62  | -0.54 | 0.58  | 54.21  | 0.01 | -0.13 | 0.96    | 0.00E+00 |
| X-21310 | 1.02  | 0.37  | -1.00 | 2.00  | 36.92  | 0.00 | -0.12 | 1.00    | 0.00E+00 |
| X-21312 | 1.56  | 1.72  | 0.40  | -0.65 | 110.31 | 0.40 | -0.55 | 0.80    | 2.30E+01 |
| X-21315 | 18.42 | 89.54 | 1.94  | 3.63  | 486.68 | 1.22 | 0.37  | 0.43    | 0.00E+00 |
| X-21319 | 1.10  | 0.59  | -0.37 | 0.71  | 54.07  | 0.00 | -0.12 | 0.94    | 6.04E+00 |
| X-21339 | 1.10  | 0.54  | -0.57 | 0.19  | 49.47  | 0.00 | -0.12 | 0.98    | 0.00E+00 |
| X-21351 | 1.58  | 1.37  | 0.10  | -0.15 | 86.95  | 0.04 | -0.23 | 0.87    | 1.69E+01 |
| X-21353 | 1.24  | 0.66  | -0.07 | -0.26 | 53.55  | 0.00 | -0.12 | 0.95    | 1.80E+00 |
| X-21364 | 1.10  | 0.60  | -0.57 | 1.13  | 54.35  | 0.01 | -0.15 | 0.94    | 0.00E+00 |
| X-21383 | 1.34  | 1.47  | -0.08 | 1.66  | 110.34 | 0.01 | -0.15 | 0.74    | 0.00E+00 |
| X-21441 | 1.27  | 0.96  | -0.52 | -0.04 | 75.68  | 0.14 | -0.38 | 0.90    | 0.00E+00 |
| X-21442 | 2.22  | 5.82  | -0.01 | -1.22 | 262.03 | 0.45 | -0.55 | 0.56    | 0.00E+00 |
| X-21467 | 1.22  | 0.88  | -0.43 | 0.08  | 72.13  | 0.13 | -0.37 | 0.89    | 0.00E+00 |
| X-21470 | 1.57  | 2.11  | -0.41 | -0.07 | 134.77 | 0.17 | -0.42 | 0.72    | 0.00E+00 |
| X-21471 | 1.26  | 1.04  | -0.29 | 0.33  | 82.59  | 0.07 | -0.28 | 0.84    | 0.00E+00 |
| X-21607 | 1.14  | 0.58  | -0.66 | 1.89  | 50.75  | 0.04 | -0.21 | 0.91    | 3.03E+00 |
| X-21628 | 1.43  | 1.40  | 3.08  | 8.29  | 98.37  | 2.94 | 7.35  | 0.85 NA |          |
| X-21661 | 1.80  | 2.52  | 1.58  | 1.36  | 139.97 | 1.44 | 0.89  | 0.75    | 0.00E+00 |
| X-21733 | 1.16  | 0.92  | -0.74 | 0.15  | 79.64  | 0.09 | -0.31 | 0.91    | 5.64E+00 |
| X-21736 | 1.24  | 0.98  | 0.00  | 0.68  | 79.08  | 0.00 | -0.12 | 0.82    | 0.00E+00 |
| X-21740 | 1.00  | 0.30  | 0.17  | -1.53 | 29.62  | 0.65 | -0.47 | 0.99    |          |
| X-21742 | 5.00  | 17.51 | 0.22  | -0.96 | 351.01 | 0.49 | -0.54 | 0.48    | 5.45E+01 |
| X-21752 | 2.14  | 4.59  | -0.02 | -0.95 | 215.25 | 0.35 | -0.54 | 0.61    | 2.14E+01 |
| X-21788 | 1.20  | 0.73  | 0.67  | -0.58 | 60.91  | 0.73 | -0.40 | 0.85    | 0.00E+00 |
| X-21796 | 1.34  | 1.33  | 1.75  | 5.32  | 99.47  | 0.00 | -0.12 | 0.64    | 4.59E+00 |
| X-21803 | 2.77  | 4.74  | 0.89  | -0.44 | 171.34 | 0.81 | -0.32 | 0.74    | 0.00E+00 |
| X-21807 | 1.23  | 1.10  | 1.70  | 2.05  | 89.47  | 1.39 | 0.77  | 0.80    |          |
| X-21815 | 2.21  | 3.89  | 0.72  | -0.67 | 176.23 | 0.69 | -0.44 | 0.70    | 0.00E+00 |
| X-21816 | 1.54  | 1.51  | 1.16  | 0.26  | 98.11  | 1.05 | 0.03  | 0.81    | 1.65E+01 |
| X-21821 | 1.38  | 1.34  | 0.00  | -0.70 | 97.04  | 0.24 | -0.49 | 0.85    | 1.56E+00 |
| X-21830 | 2.01  | 3.20  | 1.27  | 0.57  | 159.58 | 1.02 | -0.03 | 0.74    | 3.08E+01 |
| X-21831 | 1.54  | 1.74  | 0.74  | -0.47 | 113.49 | 0.74 | -0.39 | 0.75    | 1.81E+01 |
| X-21834 | 1.38  | 1.67  | -0.35 | 0.16  | 121.67 | 0.11 | -0.35 | 0.74    | 0.00E+00 |

Supplementary Table 1: Distribution of raw and transformed metabolites, the correlation between raw and transformed metabolite values, and coefficient of variation of raw metabolites

|         |       |       |       |       |        |      |       |         |          |
|---------|-------|-------|-------|-------|--------|------|-------|---------|----------|
| X-21838 | 3.19  | 5.00  | 2.82  | 7.38  | 156.82 | 2.18 | 3.48  | 0.79    | 6.80E+00 |
| X-21839 | 1.43  | 1.31  | 0.57  | -1.11 | 91.89  | 0.77 | -0.37 | 0.88    | 5.35E+00 |
| X-21840 | 1.75  | 2.27  | 0.82  | -0.10 | 130.09 | 0.62 | -0.49 | 0.75    | 3.33E+01 |
| X-21842 | 1.88  | 3.90  | 0.80  | 0.18  | 207.84 | 0.65 | -0.47 | 0.57    | 0.00E+00 |
| X-21845 | 1.49  | 1.41  | 0.34  | -1.45 | 94.99  | 0.75 | -0.38 | 0.88    | 1.21E+01 |
| X-21851 | 1.13  | 0.67  | 0.54  | -0.94 | 59.27  | 0.70 | -0.43 | 0.90    |          |
| X-22162 | 1.04  | 0.45  | -0.21 | 0.71  | 43.72  | 0.00 | -0.12 | 0.94    | 0.00E+00 |
| X-22509 | 2.13  | 4.05  | 0.52  | -0.57 | 190.36 | 0.52 | -0.53 | 0.67    | 0.00E+00 |
| X-22771 | 0.98  | 0.29  | -2.59 | 11.94 | 29.94  | 0.01 | -0.15 | 1.00    | 1.42E+01 |
| X-22776 | 2.17  | 8.13  | 2.87  | 11.69 | 375.86 | 0.03 | -0.20 | 0.38    | 0.00E+00 |
| X-22834 | 1.38  | 1.60  | -0.41 | -0.10 | 116.78 | 0.15 | -0.40 | 0.73    | 1.30E+01 |
| X-23276 | 0.96  | 0.43  | 0.38  | -1.00 | 45.32  | 0.52 | -0.53 | 0.95    | 4.78E+01 |
| X-23481 | 1.15  | 0.94  | -0.10 | 2.21  | 82.07  | 0.21 | -0.46 | 0.59    | 5.98E+01 |
| X-23587 | 1.92  | 2.71  | 0.45  | -0.64 | 141.09 | 0.47 | -0.54 | 0.74    | 2.54E+01 |
| X-23593 | 1.05  | 0.34  | -0.27 | 0.37  | 32.59  | 0.02 | -0.18 | 0.98    | 5.20E+00 |
| X-23636 | 0.94  | 0.30  | -0.35 | 0.52  | 32.09  | 0.00 | -0.12 | 0.98    | 0.00E+00 |
| X-23639 | 1.09  | 0.58  | 0.46  | 0.51  | 53.11  | 0.00 | -0.12 | 0.88    | 0.00E+00 |
| X-23641 | 1.23  | 0.78  | -0.19 | -1.30 | 63.24  | 0.50 | -0.54 | 0.87    | 1.24E+01 |
| X-23644 | 2.32  | 4.05  | 0.10  | -0.38 | 174.68 | 0.00 | -0.12 | 0.72    | 6.23E-07 |
| X-23654 | 1.05  | 0.39  | -1.22 | 0.82  | 37.16  | 0.19 | -0.44 | 0.98    | 6.86E+00 |
| X-23659 | 1.13  | 0.53  | -0.81 | -0.11 | 47.44  | 0.23 | -0.48 | 0.95    | 0.00E+00 |
| X-23678 | 1.10  | 0.52  | -0.79 | -0.17 | 47.12  | 0.22 | -0.47 | 0.96    | 9.52E+00 |
| X-23680 | 1.05  | 0.47  | -0.90 | 2.15  | 44.35  | 0.01 | -0.13 | 0.97    | 0.00E+00 |
| X-23739 | 1.11  | 0.49  | -1.00 | 1.15  | 43.72  | 0.15 | -0.40 | 0.92    | 0.00E+00 |
| X-23767 | 1.90  | 2.99  | 1.38  | 0.97  | 157.74 | 1.19 | 0.29  | 0.69    |          |
| X-23780 | 1.38  | 1.44  | 0.03  | -1.38 | 104.47 | 0.59 | -0.50 | 0.75    | 1.79E+01 |
| X-23782 | 1.15  | 0.67  | 0.28  | 0.37  | 58.11  | 0.00 | -0.12 | 0.89    | 7.21E+00 |
| X-23787 | 1.20  | 0.94  | -0.66 | 0.39  | 78.65  | 0.11 | -0.35 | 0.86    | 9.56E+00 |
| X-23890 | 2.02  | 2.79  | 2.24  | 4.52  | 138.06 | 1.58 | 1.30  | 0.75    |          |
| X-23974 | 1.14  | 0.58  | -0.48 | -1.01 | 51.47  | 0.41 | -0.55 | 0.88    | 7.85E+00 |
| X-23997 | 1.28  | 0.98  | -0.61 | -0.26 | 76.85  | 0.15 | -0.39 | 0.93    | 8.41E+00 |
| X-24295 | 1.20  | 0.75  | -1.92 | 4.32  | 62.46  | 0.07 | -0.28 | 0.92    | 0.00E+00 |
| X-24306 | 0.92  | 0.34  | -1.92 | 10.69 | 36.81  | 0.01 | -0.13 | 0.99    | 9.62E+00 |
| X-24307 | 0.91  | 0.41  | -0.73 | 0.03  | 45.15  | 0.00 | -0.12 | 0.99    | 4.87E+00 |
| X-24309 | 1.10  | 0.50  | -0.41 | 0.29  | 45.79  | 0.01 | -0.13 | 0.97    |          |
| X-24328 | 1.20  | 0.76  | -0.19 | 0.04  | 63.48  | 0.01 | -0.15 | 0.93    | 5.15E+00 |
| X-24334 | 1.07  | 0.51  | -0.06 | 0.05  | 47.96  | 0.01 | -0.13 | 0.95    | 1.84E+00 |
| X-24337 | 1.21  | 0.77  | 0.34  | 0.39  | 63.93  | 0.00 | -0.12 | 0.86    | 0.00E+00 |
| X-24338 | 1.11  | 0.66  | 2.17  | 3.65  | 59.71  | 1.81 | 2.04  | 0.93    |          |
| X-24344 | 1.56  | 1.65  | 0.90  | -0.56 | 105.53 | 0.89 | -0.22 | 0.85    | 1.52E+01 |
| X-24352 | 2.76  | 8.77  | 1.47  | 1.74  | 317.81 | 1.01 | -0.04 | 0.44    | 2.43E+01 |
| X-24414 | 1.72  | 1.80  | 1.40  | 0.92  | 104.91 | 1.19 | 0.29  | 0.81    |          |
| X-24418 | 1.16  | 0.75  | -0.31 | -0.42 | 64.58  | 0.20 | -0.45 | 0.91    | 1.71E+01 |
| X-24456 | 1.19  | 0.59  | 0.45  | -1.45 | 50.15  | 0.89 | -0.22 | 0.94    |          |
| X-24475 | 1.95  | 2.77  | -0.17 | -0.40 | 142.29 | 0.20 | -0.45 | 0.79    | 0.00E+00 |
| X-24494 | 1.16  | 0.73  | -0.46 | -0.06 | 63.17  | 0.15 | -0.40 | 0.90    | 1.09E+01 |
| X-24541 | 2.02  | 2.53  | 0.91  | -0.33 | 125.23 | 0.79 | -0.34 | 0.82    | 3.79E+01 |
| X-24543 | 3.13  | 4.90  | 2.05  | 3.35  | 156.95 | 1.48 | 0.99  | 0.76    | 3.66E+01 |
| X-24544 | 1.17  | 0.68  | -0.30 | 0.35  | 58.07  | 0.02 | -0.18 | 0.94    | 8.01E-01 |
| X-24545 | 1.23  | 1.06  | 0.87  | 0.07  | 86.73  | 0.70 | -0.43 | 0.77    |          |
| X-24546 | 1.46  | 1.54  | -0.47 | -0.52 | 105.75 | 0.25 | -0.49 | 0.80    | 0.00E+00 |
| X-24556 | 1.12  | 0.57  | -0.60 | 0.95  | 51.27  | 0.03 | -0.20 | 0.95    | 0.00E+00 |
| X-24565 | 1.68  | 2.91  | 0.74  | -0.28 | 173.99 | 0.82 | -0.31 | 0.59    | 5.06E+01 |
| X-24571 | 2.97  | 8.05  | 1.14  | 0.80  | 271.47 | 0.73 | -0.40 | 0.55    | 2.68E+01 |
| X-24576 | 1.18  | 0.74  | 5.02  | 24.62 | 63.13  | 4.65 | 20.36 | 0.98    | 0.00E+00 |
| X-24588 | 1.10  | 0.48  | -0.04 | -0.26 | 43.92  | 0.00 | -0.12 | 0.96    | 0.00E+00 |
| X-24657 | 2.22  | 4.18  | 1.83  | 3.18  | 188.11 | 1.20 | 0.33  | 0.62    |          |
| X-24736 | 1.17  | 0.79  | 0.05  | -1.63 | 67.69  | 0.68 | -0.44 | 0.90    | 1.22E+01 |
| X-24747 | 1.14  | 0.64  | -0.73 | 1.26  | 56.17  | 0.03 | -0.19 | 0.96    |          |
| X-24748 | 1.13  | 0.91  | 1.13  | 5.96  | 80.51  | 0.00 | -0.12 | 0.59    |          |
| X-24757 | 1.57  | 1.56  | 0.59  | -0.89 | 99.72  | 0.70 | -0.43 | 0.86    | 2.85E+01 |
| X-24761 | 1.81  | 2.26  | 2.65  | 6.32  | 125.03 | 2.10 | 3.16  | 0.81    | 0.00E+00 |
| X-24762 | 1.24  | 0.99  | 1.04  | 1.96  | 80.30  | 0.43 | -0.55 | 0.71    |          |
| X-24947 | 1.60  | 1.87  | -0.30 | 0.18  | 117.48 | 0.06 | -0.26 | 0.82    | 1.56E+00 |
| X-24949 | 1.16  | 0.69  | -0.15 | 0.27  | 59.11  | 0.00 | -0.12 | 0.93    | 0.00E+00 |
| X-24951 | 1.13  | 0.67  | -0.62 | 0.89  | 59.64  | 0.02 | -0.18 | 0.94    | 1.12E+01 |
| X-24953 | 1.28  | 0.97  | -0.33 | 0.00  | 75.86  | 0.06 | -0.26 | 0.90    | 2.25E+01 |
| X-24970 | 0.83  | 0.74  | -0.79 | -0.56 | 89.97  | 0.02 | -0.18 | 0.92    | 6.01E+00 |
| X-24980 | 1.79  | 2.40  | 0.38  | -1.09 | 134.37 | 0.64 | -0.47 | 0.78    |          |
| X-25009 | 1.20  | 0.78  | 1.30  | 5.18  | 64.95  | 0.01 | -0.13 | 0.69    | 1.55E+01 |
| X-25172 | 0.97  | 0.38  | -0.86 | 0.90  | 39.59  | 0.00 | -0.12 | 0.99    | 3.79E+00 |
| X-25217 | 2.51  | 4.25  | 0.99  | -0.17 | 169.15 | 0.83 | -0.30 | 0.73    | 0.00E+00 |
| X-25247 | 1.49  | 1.33  | 1.43  | 1.00  | 89.34  | 1.16 | 0.23  | 0.86    | 0.00E+00 |
| X-25271 | 4.52  | 9.63  | -0.19 | -0.44 | 213.57 | 0.10 | -0.32 | 0.69    | 2.96E+01 |
| X-25279 | 10.77 | 67.96 | 1.48  | 3.08  | 631.81 | 0.68 | -0.44 | 0.35    | 7.94E+01 |
| X-25343 | 1.08  | 0.46  | -1.64 | 4.34  | 42.88  | 0.03 | -0.19 | 0.98    | 1.04E+01 |
| X-25371 | 1.07  | 0.38  | -0.01 | -0.07 | 36.04  | 0.00 | -0.12 | 0.97    | 0.00E+00 |
| X-25417 | 1.95  | 2.62  | 1.65  | 1.61  | 134.10 | 1.50 | 1.07  | 0.76    | 2.90E+01 |
| X-25419 | 1.63  | 2.00  | 0.06  | -1.13 | 122.83 | 0.47 | -0.54 | 0.79    | 2.31E+01 |
| X-25420 | 1.27  | 0.92  | -0.17 | -1.21 | 72.05  | 0.43 | -0.55 | 0.90    | 6.17E+00 |
| X-25422 | 1.17  | 0.76  | 0.16  | -0.01 | 64.53  | 0.00 | -0.12 | 0.90    | 1.42E+00 |
| X-25433 | 1.31  | 1.16  | 0.37  | -0.92 | 88.87  | 0.56 | -0.52 | 0.83    | 0.00E+00 |
| X-25450 | 7.09  | 47.61 | 4.35  | 28.27 | 672.70 | 1.67 | 1.58  | 0.31    | 0.00E+00 |
| X-25454 | 1.38  | 1.31  | -0.04 | 0.02  | 95.23  | 0.21 | -0.46 | 0.79    |          |
| X-25457 | 1.17  | 0.61  | -0.35 | -1.09 | 51.95  | 0.35 | -0.54 | 0.96    | 1.67E+01 |
| X-25468 | 1.14  | 0.78  | 2.93  | 7.07  | 68.33  | 2.84 | 6.78  | 0.96 NA |          |
| X-25519 | 1.10  | 0.46  | -0.40 | 0.11  | 41.84  | 0.21 | -0.46 | 0.89    | 1.96E+01 |
| X-25520 | 1.45  | 1.83  | -0.07 | 0.09  | 125.97 | 0.13 | -0.38 | 0.70    | 0.00E+00 |
| X-25524 | 2.93  | 5.56  | 2.30  | 4.37  | 189.94 | 1.85 | 2.17  | 0.68    |          |
| X-25656 | 2.74  | 8.88  | 1.52  | 3.44  | 324.17 | 0.57 | -0.51 | 0.44    |          |
| X-25790 | 1.21  | 0.79  | -0.63 | -0.29 | 65.58  | 0.24 | -0.48 | 0.91    | 0.00E+00 |
| X-25805 | 1.90  | 3.09  | 2.34  | 5.34  | 162.96 | 1.61 | 1.39  | 0.67    | 0.00E+00 |
| X-25810 | 1.27  | 1.13  | 0.86  | 2.44  | 89.64  | 0.00 | -0.12 | 0.69    | 0.00E+00 |
| X-25937 | 1.29  | 1.10  | -0.19 | -1.00 | 85.22  | 0.27 | -0.50 | 0.89    | 3.07E+00 |
| X-25957 | 1.14  | 0.60  | 1.43  | 5.34  | 52.95  | 0.00 | -0.12 | 0.73    | 3.19E+01 |
| X-25991 | 1.05  | 0.42  | 0.03  | -1.59 | 40.33  | 0.61 | -0.49 | 0.99    |          |
| X-26054 | 1.06  | 0.45  | 0.07  | 0.76  | 42.37  | 0.01 | -0.15 | 0.93    | 3.06E+01 |
| X-26062 | 12.71 | 73.07 | 1.06  | 0.28  | 575.55 | 0.75 | -0.39 | 0.35    | 7.87E+01 |
| X-26106 | 1.07  | 0.46  | -0.25 | -0.42 | 43.45  | 0.00 | -0.12 | 0.98    | 0.00E+00 |
| X-26107 | 1.04  | 0.39  | -0.24 | -0.46 | 37.90  | 0.00 | -0.12 | 0.98    | 0.00E+00 |
| X-26108 | 1.03  | 0.38  | -0.87 | 1.75  | 37.07  | 0.05 | -0.24 | 0.97    | 6.18E+00 |
| X-26109 | 1.36  | 1.19  | 0.11  | -1.04 | 87.69  | 0.34 | -0.53 | 0.89    | 9.07E+00 |
| X-26111 | 1.52  | 1.58  | -0.41 | 0.18  | 104.35 | 0.01 | -0.15 | 0.86    | 1.49E+01 |
| X-26119 | 1.11  | 0.64  | -0.51 | 1.88  | 57.97  | 0.02 | -0.16 | 0.90    |          |

**Supplementary Table 2:** Parameter estimates for metabolome-wide association studies for diet-metabolite associations for each of: The Healthy Eating Index-2015 (HEI-15), The Dietary Appro

| Metabolite                                | HEI-15    |          |          | DASH      |          |          | AMED      |          |          |
|-------------------------------------------|-----------|----------|----------|-----------|----------|----------|-----------|----------|----------|
|                                           | Beta      | SE       | P        | Beta      | SE       | P        | Beta      | SE       | P        |
| carnitine                                 | -2.49E-03 | 5.97E-03 | 6.77E-01 | -1.32E-02 | 1.37E-02 | 3.38E-01 | 1.98E-02  | 3.21E-02 | 5.38E-01 |
| 3-phenylpropionate (hydrocinnamate)       | 2.10E-02  | 5.64E-03 | 2.40E-04 | 4.36E-02  | 1.30E-02 | 9.47E-04 | 7.00E-02  | 3.09E-02 | 3.09E-02 |
| phenylacetate                             | 6.25E-03  | 5.96E-03 | 2.95E-01 | 3.31E-02  | 1.36E-02 | 1.56E-02 | 2.29E-02  | 3.22E-02 | 4.78E-01 |
| hippurate                                 | 2.18E-02  | 5.70E-03 | 1.60E-04 | 5.45E-02  | 1.31E-02 | 4.02E-05 | 7.14E-02  | 3.12E-02 | 2.29E-02 |
| xanthurenate                              | 3.22E-03  | 5.41E-03 | 5.52E-01 | 2.73E-03  | 1.25E-02 | 8.26E-01 | -1.25E-02 | 2.92E-02 | 6.69E-01 |
| suberate (C8-DC)                          | -1.23E-03 | 5.79E-03 | 8.32E-01 | 1.38E-02  | 1.33E-02 | 2.99E-01 | 8.86E-03  | 3.12E-02 | 7.77E-01 |
| 3-methyl-2-oxovalerate                    | -3.95E-03 | 5.41E-03 | 4.66E-01 | -8.08E-03 | 1.25E-02 | 5.17E-01 | -9.33E-03 | 2.92E-02 | 7.49E-01 |
| methionine sulfoxide                      | 1.84E-02  | 5.85E-03 | 1.84E-03 | 4.09E-02  | 1.35E-02 | 2.62E-03 | 9.94E-02  | 3.15E-02 | 1.80E-03 |
| 3-methylhistidine                         | -6.67E-03 | 6.22E-03 | 2.84E-01 | -8.62E-03 | 1.43E-02 | 5.48E-01 | -4.84E-02 | 3.34E-02 | 1.49E-01 |
| 4-acetamidophenylglucuronide              | 7.13E-03  | 4.59E-03 | 1.21E-01 | 2.51E-02  | 1.05E-02 | 1.75E-02 | 2.31E-02  | 2.48E-02 | 3.52E-01 |
| 5-hydroxyllysine                          | -1.99E-02 | 5.73E-03 | 5.86E-04 | -2.32E-02 | 1.34E-02 | 8.50E-02 | -8.37E-02 | 3.11E-02 | 7.62E-03 |
| 4-guanidinobutanoate                      | 1.44E-02  | 5.33E-03 | 7.22E-03 | 2.83E-02  | 1.23E-02 | 2.20E-02 | 6.53E-02  | 2.88E-02 | 2.43E-02 |
| pinelate (C7-DC)                          | 4.14E-03  | 5.07E-03 | 4.16E-01 | 1.74E-02  | 1.16E-02 | 1.36E-01 | 4.76E-02  | 2.72E-02 | 8.15E-02 |
| glucuronate                               | 9.68E-04  | 5.77E-03 | 8.67E-01 | 6.57E-03  | 1.33E-02 | 6.21E-01 | -2.87E-02 | 3.10E-02 | 3.56E-01 |
| glycerol 3-phosphate                      | -3.13E-04 | 5.96E-03 | 9.58E-01 | -2.86E-03 | 1.37E-02 | 8.35E-01 | 9.86E-03  | 3.21E-02 | 7.59E-01 |
| imidazole lactate                         | -4.56E-03 | 5.74E-03 | 4.28E-01 | -1.40E-02 | 1.32E-02 | 2.89E-01 | 2.55E-02  | 3.09E-02 | 4.10E-01 |
| kynurenine                                | -5.46E-03 | 5.98E-03 | 3.62E-01 | 1.12E-02  | 1.38E-02 | 4.16E-01 | -7.53E-02 | 3.20E-02 | 1.91E-02 |
| glycerophosphorylcholine (GPC)            | 1.48E-02  | 6.10E-03 | 1.58E-02 | 1.03E-02  | 1.42E-02 | 4.69E-01 | 6.76E-02  | 3.30E-02 | 4.13E-02 |
| N-acetylglutamate                         | -1.46E-02 | 5.38E-03 | 7.14E-03 | -6.47E-03 | 1.26E-02 | 6.07E-01 | -3.52E-02 | 2.93E-02 | 2.31E-01 |
| tartrate                                  | 2.34E-02  | 4.95E-03 | 3.65E-06 | 3.59E-02  | 1.17E-02 | 2.27E-03 | 9.26E-02  | 2.72E-02 | 7.56E-04 |
| xanthosine                                | -1.23E-02 | 5.75E-03 | 3.33E-02 | 1.70E-02  | 1.33E-02 | 2.02E-01 | -8.49E-02 | 3.08E-02 | 6.25E-03 |
| ribitol                                   | -4.69E-03 | 5.87E-03 | 4.25E-01 | 2.81E-03  | 1.35E-02 | 8.36E-01 | -7.08E-03 | 3.17E-02 | 8.23E-01 |
| 2-isopropylmalate                         | 1.07E-02  | 5.72E-03 | 6.29E-02 | 5.78E-03  | 1.32E-02 | 6.63E-01 | 7.06E-02  | 3.07E-02 | 2.22E-02 |
| glyceroxycholeate                         | 3.42E-03  | 5.92E-03 | 5.64E-01 | -6.72E-03 | 1.36E-02 | 6.22E-01 | -3.23E-02 | 3.19E-02 | 3.12E-01 |
| theophylline                              | -1.69E-02 | 5.78E-03 | 3.79E-03 | -3.54E-02 | 1.33E-02 | 8.32E-03 | -6.17E-02 | 3.14E-02 | 5.01E-02 |
| quinate                                   | 1.19E-02  | 5.40E-03 | 2.86E-02 | 2.79E-03  | 1.25E-02 | 8.24E-01 | 1.94E-02  | 2.93E-02 | 5.09E-01 |
| theobromine                               | -1.21E-02 | 5.69E-03 | 3.41E-02 | -1.77E-03 | 1.32E-02 | 8.94E-01 | -2.39E-02 | 3.09E-02 | 4.39E-01 |
| gentisate                                 | 1.77E-02  | 5.41E-03 | 1.21E-03 | 3.10E-02  | 1.26E-02 | 1.42E-02 | 4.33E-02  | 2.96E-02 | 1.45E-01 |
| paraxanthine                              | -1.47E-02 | 5.79E-03 | 1.16E-02 | -2.99E-02 | 1.34E-02 | 2.58E-02 | -5.16E-02 | 3.14E-02 | 1.02E-01 |
| indolelactate                             | 5.30E-03  | 5.22E-03 | 3.10E-01 | 6.23E-03  | 1.20E-02 | 6.05E-01 | 2.72E-02  | 3.12E-02 | 3.34E-01 |
| 3-indoxyl sulfate                         | -4.72E-03 | 6.02E-03 | 4.34E-01 | 6.83E-03  | 1.39E-02 | 6.22E-01 | -4.79E-02 | 3.24E-02 | 1.39E-01 |
| gamma-glutamylphenylalanine               | -9.50E-03 | 5.55E-03 | 8.79E-02 | 7.48E-03  | 1.28E-02 | 5.60E-01 | -4.73E-02 | 2.99E-02 | 1.15E-01 |
| 4-methyl-2-oxopentanoate                  | -1.48E-03 | 5.51E-03 | 7.88E-01 | -1.26E-02 | 1.27E-02 | 3.21E-01 | -1.37E-02 | 2.97E-02 | 6.45E-01 |
| 1,5-anhydroglucitol (1,5-AG)              | -1.60E-02 | 5.61E-03 | 4.72E-03 | -1.45E-02 | 1.31E-02 | 2.68E-01 | -6.17E-02 | 3.04E-02 | 4.34E-02 |
| 2-arachidonoylglycerol (20:4)             | 5.18E-03  | 5.35E-03 | 3.34E-01 | -1.94E-04 | 1.23E-02 | 9.87E-01 | 2.24E-02  | 2.88E-02 | 4.39E-01 |
| 1-palmitoyl-GPC (O-16:0)                  | 2.40E-03  | 6.16E-03 | 6.97E-01 | -6.98E-03 | 1.42E-02 | 6.23E-01 | -1.32E-02 | 3.32E-02 | 6.91E-01 |
| 1-stearoyl-2-arachidonoyl-GPI (18:0/20:4) | -1.64E-04 | 6.00E-03 | 9.78E-01 | -2.29E-02 | 1.38E-02 | 9.75E-02 | 2.56E-02  | 3.23E-02 | 4.29E-01 |
| sphingosine 1-phosphate                   | -6.06E-03 | 6.07E-03 | 3.19E-01 | -1.10E-02 | 1.40E-02 | 4.32E-01 | -2.24E-02 | 3.28E-02 | 4.95E-01 |
| 1-stearoyl-2-oleoyl-GPS (18:0/18:1)       | -1.28E-03 | 6.25E-03 | 8.37E-01 | 9.80E-03  | 1.44E-02 | 4.96E-01 | 2.38E-02  | 3.36E-02 | 4.79E-01 |
| 1-stearoyl-GPI (18:0)                     | 6.66E-03  | 5.83E-03 | 2.54E-01 | -4.20E-03 | 1.34E-02 | 7.55E-01 | 4.47E-02  | 3.14E-02 | 1.55E-01 |
| 1,2-dipalmitoyl-GPC (16:0/16:0)           | -7.29E-03 | 6.06E-03 | 2.30E-01 | -3.60E-02 | 1.38E-02 | 9.57E-03 | -1.84E-02 | 3.27E-02 | 5.75E-01 |
| docosahexaenoate (DHA; 22:6n3)            | 6.08E-04  | 5.83E-03 | 9.17E-01 | -2.14E-02 | 1.34E-02 | 1.11E-01 | 3.50E-02  | 3.13E-02 | 2.65E-01 |
| 1-myristoyl-2-palmitoyl-GPC (14:0/16:0)   | -6.53E-03 | 5.97E-03 | 2.74E-01 | -2.82E-02 | 1.37E-02 | 4.01E-02 | -4.82E-02 | 3.21E-02 | 1.35E-01 |
| alpha-hydroxyisocaproate                  | -2.88E-03 | 5.23E-03 | 5.82E-01 | -1.69E-02 | 1.20E-02 | 1.60E-01 | -9.20E-03 | 2.82E-02 | 7.45E-01 |
| maleate                                   | 2.85E-03  | 5.70E-03 | 6.17E-01 | 1.12E-03  | 1.31E-02 | 9.32E-01 | 3.30E-02  | 3.07E-02 | 2.83E-01 |
| isovalerate (i5:0)                        | -5.99E-03 | 5.34E-03 | 2.63E-01 | -6.00E-03 | 1.23E-02 | 6.27E-01 | -3.01E-02 | 2.88E-02 | 2.96E-01 |
| 4-acetylphenol sulfate                    | 1.92E-02  | 5.70E-03 | 8.76E-04 | 5.86E-02  | 1.29E-02 | 8.60E-06 | 6.82E-02  | 3.11E-02 | 2.90E-02 |
| 2-hydroxyoctanoate                        | 3.66E-03  | 6.18E-03 | 5.54E-01 | 1.60E-02  | 1.42E-02 | 2.61E-01 | -1.21E-02 | 3.33E-02 | 7.16E-01 |
| 3-hydroxyoctanoate                        | -6.59E-03 | 5.72E-03 | 2.50E-01 | -2.35E-03 | 1.32E-02 | 8.59E-01 | -2.87E-02 | 3.09E-02 | 3.54E-01 |
| phenyllactate (PLA)                       | 8.35E-04  | 4.93E-03 | 8.66E-01 | 2.38E-03  | 1.14E-02 | 8.34E-01 | 2.16E-02  | 2.66E-02 | 4.17E-01 |
| palmitoylcarnitine (C16)                  | -2.16E-02 | 5.72E-03 | 1.90E-04 | -5.65E-02 | 1.31E-02 | 2.10E-05 | -1.04E-01 | 3.10E-02 | 8.75E-04 |
| hexanoylcarnitine (C6)                    | -1.51E-02 | 5.93E-03 | 1.15E-02 | -3.79E-02 | 1.36E-02 | 5.80E-03 | -2.69E-02 | 3.23E-02 | 4.06E-01 |
| theanine                                  | 2.86E-03  | 1.41E-03 | 4.40E-02 | 5.85E-03  | 3.26E-03 | 7.42E-02 | 9.39E-03  | 7.66E-03 | 2.21E-01 |
| N-acetylaspargate (NAA)                   | 6.42E-04  | 6.06E-03 | 9.16E-01 | 2.66E-02  | 1.39E-02 | 5.61E-02 | -2.52E-02 | 3.26E-02 | 4.41E-01 |
| dehydroepiandrosterone sulfate (DHEA-S)   | -1.01E-02 | 5.38E-03 | 6.18E-02 | -1.77E-02 | 1.24E-02 | 1.56E-01 | -6.42E-02 | 2.89E-02 | 2.71E-02 |
| acetylcarnitine (C2)                      | -3.93E-04 | 5.97E-03 | 9.48E-01 | -6.40E-04 | 1.37E-02 | 9.63E-01 | 6.65E-03  | 3.22E-02 | 8.36E-01 |
| cysteine s-sulfate                        | -2.07E-02 | 5.98E-03 | 6.35E-04 | -3.84E-02 | 1.39E-02 | 5.94E-03 | -1.15E-01 | 3.22E-02 | 4.01E-04 |
| 1-palmitoylglycerol (16:0)                | -2.33E-03 | 6.10E-03 | 7.03E-01 | -1.21E-02 | 1.40E-02 | 3.91E-01 | -2.27E-02 | 3.29E-02 | 4.90E-01 |
| tartrate (hydroxymalonate)                | 3.01E-02  | 5.24E-03 | 2.46E-08 | 6.23E-02  | 1.22E-02 | 5.93E-07 | 1.27E-01  | 2.89E-02 | 1.55E-05 |
| oxalate (ethanedioate)                    | 2.99E-02  | 5.53E-03 | 1.32E-07 | 6.69E-02  | 1.28E-02 | 3.06E-07 | 1.24E-01  | 3.04E-02 | 6.06E-05 |
| erythritol                                | 3.61E-03  | 5.91E-03 | 5.42E-01 | 1.57E-02  | 1.36E-02 | 2.48E-01 | 1.05E-02  | 3.19E-02 | 7.41E-01 |
| saccharin                                 | -4.88E-03 | 5.56E-03 | 3.81E-01 | -5.31E-03 | 1.28E-02 | 6.79E-01 | -5.58E-02 | 2.98E-02 | 6.22E-02 |
| 3-hydroxymyristate                        | -1.32E-02 | 5.88E-03 | 2.56E-02 | -3.23E-02 | 1.35E-02 | 1.77E-02 | -5.61E-02 | 3.18E-02 | 7.89E-02 |
| iminodiacetate (IDA)                      | -5.17E-03 | 6.27E-03 | 4.10E-01 | -2.01E-03 | 1.44E-02 | 8.89E-01 | -4.78E-02 | 3.37E-02 | 1.57E-01 |
| 1-oleoylglycerol (18:1)                   | 6.46E-03  | 5.99E-03 | 2.82E-01 | 3.43E-03  | 1.38E-02 | 8.04E-01 | -4.44E-03 | 3.24E-02 | 8.91E-01 |
| 3-methyl-2-oxobutyrate                    | -8.39E-03 | 5.79E-03 | 1.48E-01 | -1.72E-02 | 1.33E-02 | 1.98E-01 | -3.35E-02 | 3.13E-02 | 2.85E-01 |
| 1,6-anhydroglucose                        | -1.18E-02 | 5.26E-03 | 2.60E-02 | -1.57E-02 | 1.22E-02 | 1.99E-01 | -5.22E-02 | 2.84E-02 | 6.75E-02 |
| 2-oleoylglycerol (18:1)                   | 7.96E-03  | 4.87E-03 | 1.04E-01 | 6.19E-03  | 1.13E-02 | 5.83E-01 | 5.99E-03  | 2.64E-02 | 8.20E-01 |
| homoarginine                              | 8.99E-03  | 5.44E-03 | 9.99E-02 | 4.57E-03  | 1.26E-02 | 7.17E-01 | 1.30E-02  | 2.95E-02 | 6.59E-01 |
| homocitrulline                            | 6.29E-03  | 6.11E-03 | 3.05E-01 | 3.34E-02  | 1.40E-02 | 1.74E-02 | -2.31E-03 | 3.30E-02 | 9.44E-01 |
| pyroglutamylglutamine                     | -1.63E-03 | 5.86E-03 | 7.81E-01 | 1.22E-03  | 1.35E-02 | 9.28E-01 | -6.46E-02 | 3.14E-02 | 4.02E-02 |
| bradykinin                                | 3.21E-03  | 4.28E-03 | 4.53E-01 | 5.75E-03  | 9.84E-03 | 5.60E-01 | 1.43E-02  | 2.30E-02 | 5.35E-01 |
| glycylproline                             | -1.16E-03 | 4.85E-03 | 8.11E-01 | -1.27E-03 | 1.12E-02 | 9.09E-01 | 8.83E-03  | 2.62E-02 | 7.36E-01 |
| 2-linoleoylglycerol (18:2)                | 6.69E-03  | 6.04E-03 | 2.69E-01 | 9.38E-03  | 1.39E-02 | 5.01E-01 | 8.53E-03  | 3.26E-02 | 7.94E-01 |
| 3-hydroxydecanoate                        | -7.70E-03 | 5.78E-03 | 1.84E-01 | -1.09E-02 | 1.33E-02 | 4.16E-01 | -3.78E-02 | 3.12E-02 | 2.27E-01 |
| citramalate                               | 1.46E-02  | 5.67E-03 | 1.05E-02 | 2.68E-02  | 1.31E-02 | 4.14E-02 | 5.27E-02  | 3.08E-02 | 8.75E-02 |
| EDTA                                      | -7.20E-03 | 5.65E-03 | 2.03E-01 | -2.66E-02 | 1.29E-02 | 4.08E-02 | -5.47E-02 | 3.03E-02 | 7.26E-02 |
| N-acetyllysine                            | 2.73E-04  | 5.95E-03 | 9.63E-01 | -1.19E-02 | 1.37E-02 | 3.85E-01 | 2.40E-02  | 3.20E-02 | 4.55E-01 |
| ribonate                                  | 3.41E-03  | 5.88E-03 | 5.62E-01 | 9.27E-03  | 1.35E-02 | 4.94E-01 | -4.42E-02 | 3.16E-02 | 1.63E-01 |
| threonate                                 | 2.12E-02  | 5.44E-03 | 1.24E-04 | 5.35E-02  | 1.24E-02 | 2.34E-05 | 7.81E-02  | 2.97E-02 | 9.11E-03 |
| galactonate                               | 3.82E-03  | 5.65E-03 | 4.99E-01 | 1.06E-02  | 1.30E-02 | 4.15E-01 | -1.04E-02 | 3.04E-02 | 7.34E-01 |

Supplementary Table 2: Parameter estimates for metabolome-wide association studies for diet-metabolite associations for each of: The Healthy Eating Index-2015 (HEI-15), DASH and AMED diet

|                                                      |           |          |          |           |          |          |           |          |          |
|------------------------------------------------------|-----------|----------|----------|-----------|----------|----------|-----------|----------|----------|
| beta-sitosterol                                      | 2.10E-02  | 5.64E-03 | 2.40E-04 | 2.64E-02  | 1.32E-02 | 4.66E-02 | 1.37E-01  | 3.00E-02 | 7.25E-06 |
| indoleacetate                                        | -1.51E-03 | 5.49E-03 | 7.84E-01 | -9.02E-03 | 1.26E-02 | 4.76E-01 | -4.69E-03 | 2.96E-02 | 8.74E-01 |
| 1-linoleoylglycerol (18:2)                           | 5.78E-03  | 6.01E-03 | 3.37E-01 | 1.02E-02  | 1.38E-02 | 4.60E-01 | 2.66E-03  | 3.25E-02 | 9.35E-01 |
| 1-methylhistidine                                    | -4.23E-03 | 5.87E-03 | 4.72E-01 | -1.28E-02 | 1.35E-02 | 3.45E-01 | -2.58E-02 | 3.16E-02 | 4.16E-01 |
| butyrylcarnitine (C4)                                | -1.15E-02 | 5.86E-03 | 5.03E-02 | -2.50E-02 | 1.35E-02 | 6.55E-02 | -5.70E-02 | 3.16E-02 | 7.25E-02 |
| isobutyrylcarnitine (C4)                             | 5.85E-03  | 5.98E-03 | 3.28E-01 | 3.13E-02  | 1.37E-02 | 2.28E-02 | 5.88E-02  | 3.21E-02 | 6.80E-02 |
| glycolithocholate                                    | 1.01E-03  | 5.63E-03 | 8.57E-01 | -4.93E-03 | 1.30E-02 | 7.04E-01 | -4.99E-02 | 3.02E-02 | 9.94E-02 |
| androsterone sulfate                                 | -1.40E-02 | 5.59E-03 | 1.28E-02 | -2.67E-02 | 1.29E-02 | 3.98E-02 | -4.66E-02 | 3.04E-02 | 1.26E-01 |
| indolepropionate                                     | 3.08E-02  | 5.27E-03 | 1.48E-08 | 6.98E-02  | 1.22E-02 | 2.43E-08 | 1.24E-01  | 2.92E-02 | 2.72E-05 |
| N-(2-furoyl)glycine                                  | 6.52E-03  | 5.76E-03 | 2.59E-01 | 7.02E-03  | 1.33E-02 | 5.98E-01 | 8.08E-03  | 3.11E-02 | 7.95E-01 |
| trigonelline (N'-methylnicotinate)                   | 1.26E-02  | 5.63E-03 | 2.55E-02 | 2.26E-02  | 1.30E-02 | 8.41E-02 | 3.73E-02  | 3.05E-02 | 2.23E-01 |
| dodecanedioate (C12-DC)                              | -8.12E-03 | 5.68E-03 | 1.54E-01 | 1.54E-03  | 1.31E-02 | 9.06E-01 | -4.19E-02 | 3.06E-02 | 1.72E-01 |
| N-acetyltyrosine                                     | -1.27E-02 | 5.72E-03 | 2.75E-02 | -2.48E-02 | 1.32E-02 | 6.09E-02 | -4.91E-02 | 3.09E-02 | 1.14E-01 |
| 1,3-dimethylurate                                    | -1.72E-02 | 5.56E-03 | 2.14E-03 | -3.54E-02 | 1.28E-02 | 6.26E-03 | -7.90E-02 | 3.01E-02 | 9.10E-03 |
| 3-methylxanthine                                     | -5.41E-03 | 5.64E-03 | 3.38E-01 | 1.36E-02  | 1.30E-02 | 2.94E-01 | -2.29E-02 | 3.04E-02 | 4.52E-01 |
| 3-hydroxylaurate                                     | -1.17E-02 | 5.73E-03 | 4.19E-02 | -1.82E-02 | 1.33E-02 | 1.71E-01 | -5.07E-02 | 3.10E-02 | 1.03E-01 |
| pyridoxate                                           | 2.21E-02  | 5.47E-03 | 7.18E-05 | 5.50E-02  | 1.25E-02 | 1.63E-05 | 6.51E-02  | 3.01E-02 | 3.14E-02 |
| gamma-glutamylvaline                                 | -1.58E-02 | 5.82E-03 | 7.18E-03 | -1.85E-02 | 1.35E-02 | 1.72E-01 | -8.56E-02 | 3.13E-02 | 6.71E-03 |
| pyroglutamylglycine                                  | 7.79E-03  | 5.97E-03 | 1.93E-01 | 1.20E-02  | 1.38E-02 | 3.85E-01 | 5.62E-02  | 3.21E-02 | 8.09E-02 |
| pyroglutamylvaline                                   | -5.23E-03 | 5.96E-03 | 3.81E-01 | 1.30E-02  | 1.37E-02 | 3.43E-01 | -4.12E-02 | 3.21E-02 | 2.00E-01 |
| 3-hydroxysebacate                                    | -1.16E-04 | 5.79E-03 | 9.84E-01 | 1.39E-02  | 1.33E-02 | 2.96E-01 | -2.44E-03 | 3.12E-02 | 9.38E-01 |
| 5-hydroxyhexanoate                                   | 7.10E-03  | 5.17E-03 | 1.71E-01 | 2.66E-02  | 1.18E-02 | 2.55E-02 | 4.16E-02  | 2.79E-02 | 1.36E-01 |
| propionylglycine                                     | 1.18E-03  | 5.83E-03 | 8.40E-01 | 2.10E-02  | 1.34E-02 | 1.18E-01 | 1.61E-02  | 3.14E-02 | 6.08E-01 |
| butyrylglycine                                       | 6.43E-03  | 5.66E-03 | 2.57E-01 | 1.09E-02  | 1.30E-02 | 4.02E-01 | 3.05E-02  | 3.05E-02 | 3.19E-01 |
| 2-methylbutyrylglycine                               | 4.00E-03  | 5.09E-03 | 4.33E-01 | 1.26E-02  | 1.17E-02 | 2.81E-01 | 9.18E-03  | 2.75E-02 | 7.38E-01 |
| propionylcarnitine (C3)                              | -1.85E-03 | 5.90E-03 | 7.54E-01 | 1.24E-02  | 1.36E-02 | 3.62E-01 | 7.00E-03  | 3.18E-02 | 8.26E-01 |
| pro-hydroxy-pro                                      | -1.74E-02 | 5.83E-03 | 3.13E-03 | -1.15E-02 | 1.36E-02 | 4.00E-01 | -5.58E-02 | 3.17E-02 | 7.97E-02 |
| 3-hydroxy-2-ethylpropionate                          | -9.92E-03 | 5.56E-03 | 7.55E-02 | 4.73E-03  | 1.29E-02 | 7.13E-01 | -6.17E-02 | 2.99E-02 | 4.00E-02 |
| 3-carboxy-4-methyl-5-propyl-2-furanpropanoate (CMPF) | 1.05E-02  | 5.91E-03 | 7.61E-02 | 4.05E-05  | 1.37E-02 | 9.98E-01 | 8.74E-02  | 3.16E-02 | 6.04E-03 |
| docosapentaenoate (n3 DPA; 22:5n3)                   | -1.13E-02 | 5.89E-03 | 5.68E-02 | -3.24E-02 | 1.35E-02 | 1.69E-02 | -3.32E-02 | 3.19E-02 | 2.98E-01 |
| docosadienoate (22:2n6)                              | -1.37E-02 | 5.92E-03 | 2.11E-02 | -4.38E-02 | 1.35E-02 | 1.33E-03 | -6.82E-02 | 3.20E-02 | 3.37E-02 |
| adrenate (22:4n6)                                    | -2.64E-02 | 5.87E-03 | 9.89E-06 | -5.81E-02 | 1.36E-02 | 2.51E-05 | -9.97E-02 | 3.22E-02 | 2.17E-03 |
| 10-undecenoate (11:1n1)                              | -1.23E-02 | 5.79E-03 | 3.49E-02 | -3.56E-02 | 1.33E-02 | 7.75E-03 | -9.11E-02 | 3.10E-02 | 3.52E-03 |
| 4-imidazoleacetate                                   | 1.25E-02  | 5.56E-03 | 2.53E-02 | 3.05E-02  | 1.28E-02 | 1.77E-02 | 6.05E-02  | 3.00E-02 | 4.48E-02 |
| 1-methyl-4-imidazoleacetate                          | -8.98E-03 | 5.52E-03 | 1.05E-01 | -5.45E-03 | 1.28E-02 | 6.69E-01 | -4.32E-02 | 2.98E-02 | 1.48E-01 |
| sebacate (C10-DC)                                    | -9.57E-03 | 5.65E-03 | 9.11E-02 | -8.77E-03 | 1.31E-02 | 5.02E-01 | -6.58E-02 | 3.03E-02 | 3.10E-02 |
| guanidinosuccinate                                   | 1.80E-02  | 5.74E-03 | 1.91E-03 | 4.47E-02  | 1.32E-02 | 7.92E-04 | 6.81E-02  | 3.12E-02 | 2.99E-02 |
| delta-tocopherol                                     | -9.41E-03 | 5.82E-03 | 1.07E-01 | -1.10E-02 | 1.35E-02 | 4.14E-01 | -5.70E-03 | 3.15E-02 | 8.57E-01 |
| l-urobilinogen                                       | -1.05E-02 | 4.34E-03 | 1.64E-02 | -1.42E-02 | 1.00E-02 | 1.58E-01 | -1.19E-03 | 2.36E-02 | 9.60E-01 |
| stearidonate (18:4n3)                                | -1.06E-02 | 5.64E-03 | 6.13E-02 | -2.91E-02 | 1.29E-02 | 2.52E-02 | -2.08E-02 | 3.05E-02 | 4.97E-01 |
| 5-dodecenoate (12:1n7)                               | -1.64E-02 | 5.52E-03 | 3.32E-03 | -3.92E-02 | 1.27E-02 | 2.19E-03 | -4.96E-02 | 3.01E-02 | 1.00E-01 |
| octanoylcarnitine (C8)                               | -8.40E-03 | 5.97E-03 | 1.61E-01 | -3.11E-02 | 1.37E-02 | 2.38E-02 | -5.21E-03 | 3.23E-02 | 8.72E-01 |
| tauro-beta-muricholate                               | 9.81E-03  | 5.31E-03 | 6.57E-02 | 2.20E-02  | 1.22E-02 | 7.31E-02 | 8.34E-03  | 2.88E-02 | 7.72E-01 |
| decanoylcarnitine (C10)                              | -8.22E-03 | 6.04E-03 | 1.74E-01 | -2.96E-02 | 1.38E-02 | 3.32E-02 | -1.99E-03 | 3.26E-02 | 9.51E-01 |
| N-acetylglutamine                                    | -1.41E-02 | 5.48E-03 | 1.08E-02 | -2.77E-02 | 1.27E-02 | 2.97E-02 | -5.14E-02 | 2.97E-02 | 8.54E-02 |
| N-acetyltryptophan                                   | -2.95E-03 | 5.51E-03 | 5.93E-01 | -1.04E-02 | 1.27E-02 | 4.13E-01 | -1.43E-02 | 2.97E-02 | 6.29E-01 |
| N-acetylphenylalanine                                | -1.59E-02 | 5.45E-03 | 3.83E-03 | -2.98E-02 | 1.26E-02 | 1.87E-02 | -5.52E-02 | 2.96E-02 | 6.37E-02 |
| 1-palmitoyl-GPC (16:0)                               | 7.31E-03  | 5.92E-03 | 2.18E-01 | -1.19E-02 | 1.37E-02 | 3.83E-01 | 2.29E-02  | 3.20E-02 | 4.75E-01 |
| 1-margaroyl-GPC (17:0)                               | 1.34E-02  | 5.94E-03 | 2.52E-02 | 3.92E-02  | 1.36E-02 | 4.25E-03 | 2.78E-02  | 3.23E-02 | 3.90E-01 |
| N-acetylarginine                                     | -4.64E-03 | 5.98E-03 | 4.38E-01 | -5.69E-03 | 1.38E-02 | 6.80E-01 | 2.62E-02  | 3.22E-02 | 4.16E-01 |
| piperine                                             | 6.07E-03  | 6.06E-03 | 3.17E-01 | -2.78E-02 | 1.39E-02 | 4.63E-02 | 5.97E-02  | 3.25E-02 | 6.76E-02 |
| campesterol                                          | 5.01E-03  | 5.93E-03 | 3.99E-01 | -1.44E-02 | 1.36E-02 | 2.93E-01 | 7.87E-02  | 3.17E-02 | 1.35E-02 |
| myristoylcarnitine (C14)                             | -2.27E-02 | 5.66E-03 | 7.64E-05 | -4.21E-02 | 1.32E-02 | 1.56E-03 | -9.94E-02 | 3.08E-02 | 1.41E-03 |
| 1-stearoyl-GPC (18:0)                                | 1.30E-02  | 5.99E-03 | 3.08E-02 | 1.62E-02  | 1.39E-02 | 2.43E-01 | 6.50E-02  | 3.23E-02 | 4.53E-02 |
| 1-oleoyl-GPC (18:1)                                  | 1.88E-02  | 5.57E-03 | 8.63E-04 | 2.22E-02  | 1.30E-02 | 8.84E-02 | 9.46E-02  | 3.01E-02 | 1.85E-03 |
| N-acetylthreonine                                    | -3.30E-03 | 5.79E-03 | 5.69E-01 | 2.08E-02  | 1.33E-02 | 1.18E-01 | -1.88E-02 | 3.12E-02 | 5.48E-01 |
| N-acetylisoleucine                                   | -7.01E-03 | 5.99E-03 | 2.43E-01 | -1.49E-02 | 1.38E-02 | 2.82E-01 | -4.27E-03 | 3.23E-02 | 8.95E-01 |
| 10-nonadecenoate (19:1n9)                            | -2.18E-02 | 5.62E-03 | 1.37E-04 | -5.27E-02 | 1.29E-02 | 5.84E-05 | -1.10E-01 | 3.04E-02 | 3.35E-04 |
| 10-heptadecenoate (17:1n7)                           | -2.46E-02 | 5.38E-03 | 7.51E-06 | -5.63E-02 | 1.24E-02 | 8.21E-06 | -1.13E-01 | 2.93E-02 | 1.36E-04 |
| hyocholate                                           | -1.44E-02 | 5.68E-03 | 1.19E-02 | -1.90E-02 | 1.32E-02 | 1.50E-01 | 3.44E-03  | 3.10E-02 | 9.12E-01 |
| HWESASLLR                                            | 1.01E-03  | 4.75E-03 | 8.32E-01 | 7.79E-03  | 1.09E-02 | 4.77E-01 | -7.30E-03 | 2.56E-02 | 7.76E-01 |
| epiandrosterone sulfate                              | -9.20E-03 | 5.44E-03 | 9.21E-02 | -1.89E-02 | 1.25E-02 | 1.33E-01 | -3.00E-02 | 2.94E-02 | 3.09E-01 |
| bradykinin, des-arg(9)                               | 3.38E-03  | 4.08E-03 | 4.08E-01 | 1.17E-02  | 9.37E-03 | 2.13E-01 | 1.25E-02  | 2.20E-02 | 5.69E-01 |
| N-acetylhistidine                                    | -7.49E-03 | 5.84E-03 | 2.01E-01 | -4.64E-03 | 1.35E-02 | 7.31E-01 | -2.33E-02 | 3.15E-02 | 4.60E-01 |
| gamma-glutamylglycine                                | -6.86E-03 | 6.03E-03 | 2.57E-01 | 1.84E-03  | 1.39E-02 | 8.95E-01 | -3.22E-02 | 3.25E-02 | 3.24E-01 |
| gamma-glutamyltryptophan                             | -1.92E-03 | 5.81E-03 | 7.41E-01 | 5.34E-03  | 1.34E-02 | 6.90E-01 | 8.04E-03  | 3.13E-02 | 7.97E-01 |
| stachydrine                                          | 2.01E-02  | 6.06E-03 | 1.06E-03 | 5.01E-02  | 1.39E-02 | 3.73E-04 | 1.03E-01  | 3.27E-02 | 1.87E-03 |
| alpha-hydroxyisovalerate                             | -4.12E-03 | 5.50E-03 | 4.55E-01 | -3.53E-02 | 1.25E-02 | 5.09E-03 | 3.87E-02  | 2.96E-02 | 1.92E-01 |
| hydroxybupropion                                     | 1.64E-03  | 2.60E-03 | 5.29E-01 | 1.04E-02  | 1.25E-02 | 8.29E-02 | -1.35E-02 | 1.40E-02 | 3.37E-01 |
| gamma-glutamylmethionine                             | -8.66E-03 | 5.54E-03 | 1.19E-01 | -7.84E-03 | 1.28E-02 | 5.40E-01 | -4.81E-02 | 2.98E-02 | 1.08E-01 |
| gamma-glutamylthreonine                              | -1.51E-02 | 5.89E-03 | 1.09E-02 | -2.20E-02 | 1.36E-02 | 1.08E-01 | -3.85E-02 | 3.20E-02 | 2.30E-01 |
| p-cresol sulfate                                     | 3.28E-03  | 6.00E-03 | 5.86E-01 | 2.54E-02  | 1.37E-02 | 6.57E-02 | -2.96E-02 | 3.22E-02 | 3.60E-01 |
| erythronate*                                         | 6.99E-03  | 5.82E-03 | 2.30E-01 | 3.46E-02  | 1.33E-02 | 9.63E-03 | 4.47E-02  | 3.13E-02 | 1.55E-01 |
| Fibrinopeptide A*                                    | 4.92E-03  | 4.40E-03 | 2.65E-01 | 8.01E-03  | 1.01E-02 | 4.31E-01 | 1.07E-02  | 2.38E-02 | 6.53E-01 |
| Fibrinopeptide A, des-ala(1)*                        | 5.98E-03  | 4.47E-03 | 1.82E-01 | 1.02E-02  | 1.03E-02 | 3.24E-01 | 1.88E-02  | 2.41E-02 | 4.37E-01 |
| Fibrinopeptide A, phosphono-ser(3)*                  | 1.69E-03  | 4.22E-03 | 6.89E-01 | 4.95E-03  | 9.72E-03 | 6.11E-01 | 4.85E-03  | 2.28E-02 | 8.31E-01 |
| HWESASXXR*                                           | 5.63E-03  | 4.35E-03 | 1.96E-01 | 1.59E-02  | 9.99E-03 | 1.14E-01 | 1.59E-02  | 2.35E-02 | 4.99E-01 |
| HWESASXX*                                            | 7.31E-03  | 5.93E-03 | 2.18E-01 | 1.89E-02  | 1.36E-02 | 1.67E-01 | 2.49E-02  | 3.20E-02 | 4.38E-01 |
| HXGXAX*                                              | 6.65E-03  | 3.85E-03 | 8.53E-02 | 1.31E-02  | 8.88E-03 | 1.42E-01 | 1.84E-02  | 2.08E-02 | 3.77E-01 |
| salicylic glucuronide*                               | 8.17E-03  | 5.78E-03 | 1.58E-01 | 2.74E-02  | 1.32E-02 | 3.95E-02 | -4.60E-03 | 3.12E-02 | 8.83E-01 |
| eicosenoate (20:1)                                   | -8.18E-03 | 5.74E-03 | 1.55E-01 | -2.66E-02 | 1.32E-02 | 4.43E-02 | -3.30E-02 | 3.10E-02 | 2.87E-01 |
| linolenate [alpha or gamma; (18:3n3 or 6)]           | -1.01E-02 | 5.52E-03 | 6.89E-02 | -2.10E-02 | 1.27E-02 | 9.96E-02 | -3.07E-02 | 2.99E-02 | 3.06E-01 |
| aconitate [cis or trans]                             | -1.48E-02 | 5.49E-03 | 7.31E-03 | -6.45E-03 | 1.28E-02 | 6.15E-01 | -6.33E-02 | 2.98E-02 | 3.42E-02 |
| 1-myristoyl-GPC (14:0)                               | 3.75E-04  | 5.79E-03 | 9.48E-01 | -9.52E-03 | 1.33E-02 | 4.75E-01 | -2.92E-02 | 3.11E-02 | 3.49E-01 |

Supplementary Table 2: Parameter estimates for metabolome-wide association studies for diet-metabolite associations for each of: The Healthy Eating Index-2015 (HEI-15), DASH and AMED diet

|                                                |           |          |          |           |          |          |           |          |          |
|------------------------------------------------|-----------|----------|----------|-----------|----------|----------|-----------|----------|----------|
| 1-arachidoyl-GPC (20:0)                        | 3.57E-02  | 5.62E-03 | 8.63E-10 | 5.98E-02  | 1.34E-02 | 1.11E-05 | 1.80E-01  | 3.06E-02 | 1.04E-08 |
| metoprolol acid metabolite*                    | 1.11E-03  | 2.71E-03 | 6.82E-01 | 9.60E-03  | 6.21E-03 | 1.23E-01 | 1.43E-02  | 1.46E-02 | 3.27E-01 |
| heme                                           | 9.00E-04  | 5.93E-03 | 8.80E-01 | 3.57E-04  | 1.37E-02 | 9.79E-01 | 5.34E-03  | 3.20E-02 | 8.68E-01 |
| stearoylcarnitine (C18)                        | -1.01E-02 | 5.76E-03 | 8.05E-02 | -1.63E-02 | 1.33E-02 | 2.21E-01 | -2.57E-02 | 3.12E-02 | 4.10E-01 |
| laurylcarnitine (C12)                          | -1.48E-02 | 5.88E-03 | 1.27E-02 | -4.02E-02 | 1.35E-02 | 3.13E-03 | -4.59E-02 | 3.19E-02 | 1.52E-01 |
| isovalerylcarnitine (C5)                       | -1.17E-02 | 5.99E-03 | 5.24E-02 | -1.27E-02 | 1.39E-02 | 3.59E-01 | -3.57E-02 | 3.24E-02 | 2.72E-01 |
| 1-linoleoyl-GPC (18:2)                         | 1.13E-02  | 5.68E-03 | 4.75E-02 | 2.32E-02  | 1.31E-02 | 7.76E-02 | 3.05E-02  | 3.05E-02 | 1.52E-02 |
| 7-methylxanthine                               | -5.11E-03 | 5.67E-03 | 3.68E-01 | 1.85E-02  | 1.30E-02 | 1.55E-01 | -2.16E-02 | 3.06E-02 | 4.79E-01 |
| 1,3,7-trimethylurate                           | -1.51E-02 | 5.69E-03 | 8.32E-03 | -2.93E-02 | 1.31E-02 | 2.67E-02 | -6.64E-02 | 3.08E-02 | 3.18E-02 |
| 3,7-dimethylurate                              | -6.18E-03 | 5.59E-03 | 2.70E-01 | 8.81E-03  | 1.29E-02 | 4.94E-01 | -1.99E-02 | 3.01E-02 | 5.10E-01 |
| 1,7-dimethylurate                              | -1.67E-02 | 5.81E-03 | 4.24E-03 | -2.72E-02 | 1.35E-02 | 4.46E-02 | -6.83E-02 | 3.15E-02 | 3.10E-02 |
| 1-methylurate                                  | -7.67E-03 | 5.87E-03 | 1.93E-01 | -1.15E-02 | 1.35E-02 | 3.96E-01 | -3.01E-02 | 3.17E-02 | 3.43E-01 |
| 5-acetyl-amino-6-formylamino-3-methyluracil    | -8.36E-03 | 5.75E-03 | 1.47E-01 | -1.94E-02 | 1.32E-02 | 1.44E-01 | -6.15E-02 | 3.09E-02 | 4.74E-02 |
| 5-acetyl-amino-6-amino-3-methyluracil          | -1.09E-02 | 5.80E-03 | 6.15E-02 | -1.27E-02 | 1.34E-02 | 3.46E-01 | -5.51E-02 | 3.13E-02 | 7.91E-02 |
| indolebutyrate                                 | -7.36E-04 | 5.41E-03 | 8.92E-01 | 2.91E-02  | 1.23E-02 | 1.90E-02 | -3.38E-02 | 2.91E-02 | 2.47E-01 |
| 1-methylxanthine                               | -1.20E-02 | 5.64E-03 | 3.49E-02 | -2.06E-02 | 1.30E-02 | 1.15E-01 | -4.03E-02 | 3.05E-02 | 1.88E-01 |
| N1-methylinosine                               | -1.02E-02 | 6.03E-03 | 9.17E-02 | 6.28E-03  | 1.39E-02 | 6.53E-01 | -7.72E-02 | 3.23E-02 | 1.75E-02 |
| N2,N2-dimethylguanosine                        | -1.33E-02 | 5.85E-03 | 2.41E-02 | -5.91E-03 | 1.36E-02 | 6.64E-01 | -9.57E-02 | 3.13E-02 | 2.47E-03 |
| N4-acetylcytidine                              | -1.50E-02 | 5.76E-03 | 9.65E-03 | -1.23E-02 | 1.34E-02 | 3.61E-01 | -6.93E-02 | 3.11E-02 | 2.69E-02 |
| N6-carbamoylthreonyl-adenosine                 | -1.13E-02 | 5.67E-03 | 4.70E-02 | -1.40E-03 | 1.31E-02 | 9.15E-01 | -7.70E-02 | 3.03E-02 | 4.44E-03 |
| orotidine                                      | -1.57E-02 | 5.57E-03 | 5.12E-03 | -1.26E-02 | 1.30E-02 | 3.34E-01 | -8.10E-02 | 3.01E-02 | 7.47E-03 |
| phenylacetylglutamine                          | 2.85E-03  | 6.09E-03 | 6.40E-01 | 2.95E-02  | 1.39E-02 | 3.48E-02 | -1.20E-03 | 3.28E-02 | 9.71E-01 |
| 4-hydroxyhippurate                             | -3.70E-03 | 6.07E-03 | 5.43E-01 | 1.55E-02  | 1.40E-02 | 2.66E-01 | 1.32E-02  | 3.27E-02 | 6.87E-01 |
| 5,6-dihydrouridine                             | -9.70E-03 | 5.81E-03 | 9.63E-02 | -2.54E-03 | 1.34E-02 | 8.50E-01 | -5.40E-02 | 3.13E-02 | 8.54E-02 |
| 3-(3-amino-3-carboxypropyl)uridine*            | -9.19E-03 | 5.87E-03 | 1.19E-01 | -1.12E-02 | 1.35E-02 | 4.07E-01 | -8.03E-02 | 3.14E-02 | 1.10E-02 |
| 1-arachidonoylglycerol (20:4)                  | -5.01E-03 | 5.41E-03 | 3.55E-01 | -2.24E-02 | 1.24E-02 | 7.25E-02 | -1.76E-02 | 2.92E-02 | 5.46E-01 |
| 1-linolenoylglycerol (18:3)                    | 1.05E-02  | 5.42E-03 | 5.27E-02 | 1.36E-02  | 1.25E-02 | 2.77E-01 | 3.77E-02  | 2.93E-02 | 1.99E-01 |
| cysteine-glutathione disulfide                 | -3.33E-03 | 5.25E-03 | 5.27E-01 | -2.43E-03 | 1.21E-02 | 8.41E-01 | -2.94E-02 | 2.83E-02 | 3.00E-01 |
| 5-methyluridine (ribothymidine)                | -6.14E-03 | 6.09E-03 | 3.14E-01 | 1.43E-04  | 1.41E-02 | 9.92E-01 | -3.50E-02 | 3.28E-02 | 2.88E-01 |
| isovalerylglycine                              | 7.85E-03  | 5.72E-03 | 1.71E-01 | 3.60E-02  | 1.30E-02 | 6.12E-03 | 4.32E-02  | 3.08E-02 | 1.62E-01 |
| 3-hydroxydodecanedioate*                       | -3.21E-03 | 5.57E-03 | 5.64E-01 | -3.67E-03 | 1.28E-02 | 7.75E-01 | -3.47E-03 | 3.00E-02 | 9.08E-01 |
| 7-methylguanine                                | -1.14E-02 | 5.97E-03 | 5.68E-02 | -1.44E-02 | 1.38E-02 | 2.97E-01 | -6.27E-02 | 3.22E-02 | 5.25E-02 |
| 1-stearoyl-GPE (18:0)                          | 9.72E-03  | 5.94E-03 | 1.03E-01 | 5.16E-03  | 1.37E-02 | 7.07E-01 | 5.94E-02  | 3.20E-02 | 6.43E-02 |
| 1-stearoyl-GPG (18:0)                          | -7.35E-03 | 5.82E-03 | 2.08E-01 | -1.41E-02 | 1.34E-02 | 2.93E-01 | -6.99E-02 | 3.12E-02 | 2.58E-02 |
| N1-Methyl-2-pyridone-5-carboxamide             | -2.27E-03 | 6.00E-03 | 7.05E-01 | 2.02E-02  | 1.38E-02 | 1.44E-01 | -3.39E-02 | 3.23E-02 | 2.95E-01 |
| mead acid (20:3n9)                             | -8.22E-03 | 6.02E-03 | 1.73E-01 | -2.86E-02 | 1.38E-02 | 3.92E-02 | -5.77E-02 | 3.24E-02 | 7.58E-02 |
| gamma-glutamylisoleucine*                      | -9.67E-03 | 5.58E-03 | 8.38E-02 | 1.71E-03  | 1.29E-02 | 8.95E-01 | -4.33E-02 | 3.01E-02 | 1.51E-01 |
| oleoylcarnitine (C18:1)                        | -3.21E-03 | 5.69E-03 | 5.73E-01 | -2.32E-02 | 1.30E-02 | 7.62E-02 | -8.69E-03 | 3.07E-02 | 7.77E-01 |
| 2-methylbutyrylcarnitine (C5)                  | 6.67E-04  | 6.05E-03 | 9.12E-01 | 1.38E-02  | 1.39E-02 | 3.21E-01 | 1.11E-03  | 3.26E-02 | 9.73E-01 |
| phenol sulfate                                 | -2.27E-03 | 5.90E-03 | 7.01E-01 | 4.58E-03  | 1.36E-02 | 7.36E-01 | 1.55E-02  | 3.18E-02 | 6.27E-01 |
| 1-palmitoleoyl-GPC (16:1)*                     | -2.22E-04 | 5.72E-03 | 9.69E-01 | -2.31E-02 | 1.31E-02 | 7.84E-02 | -1.97E-02 | 3.08E-02 | 5.22E-01 |
| hexanoylglycine                                | -2.96E-03 | 5.57E-03 | 5.96E-01 | -2.04E-02 | 1.28E-02 | 1.11E-01 | -2.06E-02 | 3.00E-02 | 4.92E-01 |
| glutamine_degradant*                           | 2.17E-03  | 4.96E-03 | 6.62E-01 | 1.92E-02  | 1.14E-02 | 9.33E-02 | -7.42E-05 | 2.68E-02 | 9.98E-01 |
| 2-hydroxy-3-methylvalerate                     | 1.54E-03  | 5.14E-03 | 7.65E-01 | -2.21E-02 | 1.18E-02 | 6.16E-02 | 6.29E-02  | 2.75E-02 | 2.28E-02 |
| homostachydrine*                               | 5.28E-03  | 5.88E-03 | 3.70E-01 | 1.17E-02  | 1.35E-02 | 3.88E-01 | -1.64E-02 | 3.17E-02 | 6.05E-01 |
| 1-arachidonoyl-GPC (20:4n6)*                   | -2.38E-03 | 6.03E-03 | 6.94E-01 | -1.58E-02 | 1.39E-02 | 2.57E-01 | 1.25E-04  | 3.25E-02 | 9.97E-01 |
| 1-dihomo-linolenoyl-GPC (20:3n3 or 6)*         | 9.45E-03  | 5.71E-03 | 9.89E-02 | 1.22E-02  | 1.32E-02 | 3.54E-01 | 5.53E-04  | 3.09E-02 | 9.86E-01 |
| 1-dihomo-linolenoyl-GPC (20:2)*                | 2.12E-02  | 5.67E-03 | 2.31E-04 | 2.83E-02  | 1.33E-02 | 3.38E-02 | 9.33E-02  | 3.08E-02 | 2.70E-03 |
| 2-arachidonoyl-GPC (20:4)*                     | -2.23E-03 | 6.12E-03 | 7.16E-01 | -2.01E-02 | 1.40E-02 | 1.53E-01 | -7.61E-03 | 3.30E-02 | 8.18E-01 |
| 2-oleoyl-GPC (18:1)*                           | 1.07E-02  | 5.76E-03 | 6.40E-02 | 5.34E-03  | 1.33E-02 | 6.90E-01 | 5.53E-02  | 3.11E-02 | 7.62E-02 |
| 2-linoleoyl-GPC (18:2)*                        | 4.63E-03  | 5.85E-03 | 4.30E-01 | 1.52E-02  | 1.35E-02 | 2.59E-01 | 3.67E-02  | 3.15E-02 | 2.45E-01 |
| 2-palmitoleoyl-GPC (16:1)*                     | -4.24E-03 | 5.60E-03 | 4.50E-01 | -2.53E-02 | 1.28E-02 | 4.99E-02 | -3.03E-02 | 3.02E-02 | 3.17E-01 |
| 2-palmitoyl-GPC (16:0)*                        | 2.73E-03  | 5.92E-03 | 6.46E-01 | -1.73E-02 | 1.36E-02 | 2.04E-01 | -8.61E-03 | 3.19E-02 | 7.88E-01 |
| 2-myristoyl-GPC (14:0)*                        | 3.18E-03  | 5.82E-03 | 5.85E-01 | -6.21E-03 | 1.34E-02 | 6.44E-01 | -1.98E-02 | 3.14E-02 | 5.28E-01 |
| 1-docosahexaenoyl-GPC (22:6)*                  | 1.55E-02  | 5.84E-03 | 8.30E-03 | 7.25E-03  | 1.36E-02 | 5.94E-01 | 1.13E-01  | 3.11E-02 | 3.50E-04 |
| 1-palmitoyl-GPE (16:0)                         | 6.21E-03  | 5.98E-03 | 3.00E-01 | -1.15E-02 | 1.38E-02 | 4.03E-01 | 3.21E-02  | 3.22E-02 | 3.19E-01 |
| 1-oleoyl-GPE (18:1)                            | 1.22E-02  | 5.67E-03 | 3.24E-02 | 2.71E-02  | 1.31E-02 | 3.86E-02 | 7.08E-02  | 3.05E-02 | 2.11E-02 |
| 1-linoleoyl-GPE (18:2)*                        | 1.12E-03  | 5.74E-03 | 8.45E-01 | 9.63E-03  | 1.32E-02 | 4.66E-01 | 1.25E-02  | 3.09E-02 | 6.87E-01 |
| 1-arachidonoyl-GPE (20:4n6)*                   | -1.03E-02 | 5.91E-03 | 8.18E-02 | -3.15E-02 | 1.35E-02 | 2.09E-02 | -3.38E-02 | 3.20E-02 | 2.91E-01 |
| N-acetylcitrulline                             | -1.13E-02 | 5.32E-03 | 3.52E-03 | -4.45E-03 | 1.23E-02 | 7.19E-01 | -3.58E-02 | 2.88E-02 | 2.15E-01 |
| 2-hydroxypalmitate                             | -9.35E-03 | 5.83E-03 | 1.10E-01 | -2.46E-02 | 1.34E-02 | 6.70E-02 | -5.30E-02 | 3.14E-02 | 9.24E-02 |
| docosapentaenoate (n6 DPA; 22:5n6)             | -1.85E-02 | 6.02E-03 | 2.35E-03 | -5.36E-02 | 1.37E-02 | 1.17E-04 | -1.06E-01 | 3.24E-02 | 1.20E-03 |
| gulonate*                                      | 3.77E-03  | 5.81E-03 | 5.17E-01 | 1.70E-02  | 1.33E-02 | 2.05E-01 | -1.74E-02 | 3.13E-02 | 5.79E-01 |
| isobutyrylglycine                              | 8.00E-03  | 5.75E-03 | 1.65E-01 | 2.73E-02  | 1.32E-02 | 3.91E-02 | 3.14E-02  | 3.10E-02 | 3.13E-01 |
| glutaryl carnitine (C5-DC)                     | -9.14E-03 | 5.87E-03 | 1.21E-01 | -2.36E-02 | 1.35E-02 | 8.13E-02 | -6.58E-04 | 3.18E-02 | 9.83E-01 |
| 2-methylmalonylcarnitine (C4-DC)               | -1.23E-03 | 5.35E-03 | 8.18E-01 | 7.13E-03  | 1.23E-02 | 5.63E-01 | -3.14E-02 | 2.88E-02 | 2.76E-01 |
| tiglylcarnitine (C5:1-DC)                      | 3.43E-03  | 5.69E-03 | 5.47E-01 | 2.48E-02  | 1.30E-02 | 5.79E-02 | -1.47E-02 | 3.06E-02 | 6.32E-01 |
| hydroquinone sulfate                           | 6.62E-03  | 6.16E-03 | 2.83E-01 | 3.21E-02  | 1.41E-02 | 2.33E-02 | 4.71E-02  | 3.32E-02 | 1.56E-01 |
| catechol sulfate                               | 3.18E-02  | 5.20E-03 | 3.24E-09 | 6.33E-02  | 1.22E-02 | 3.73E-02 | 1.26E-01  | 2.89E-02 | 1.88E-05 |
| cholesterol sulfate                            | 6.48E-03  | 5.76E-03 | 2.62E-01 | -7.79E-03 | 1.33E-02 | 5.58E-01 | 5.14E-02  | 3.10E-02 | 9.81E-02 |
| 7-alpha-hydroxy-3-oxo-4-cholestenoate (7-Hoca) | -1.32E-02 | 5.92E-03 | 2.65E-02 | -1.92E-02 | 1.37E-02 | 1.63E-01 | -4.33E-02 | 3.21E-02 | 1.78E-01 |
| tetradecanedioate (C14-DC)                     | -9.75E-03 | 5.52E-03 | 7.84E-02 | -3.10E-02 | 1.26E-02 | 1.49E-02 | -5.74E-02 | 2.97E-02 | 5.43E-02 |
| hexadecanedioate (C16-DC)                      | -1.29E-02 | 5.60E-03 | 2.20E-02 | -3.13E-02 | 1.29E-02 | 1.55E-02 | -5.38E-02 | 3.03E-02 | 7.69E-02 |
| octadecanedioate (C18-DC)                      | -6.94E-03 | 5.86E-03 | 2.37E-01 | -5.47E-03 | 1.35E-02 | 6.86E-01 | -1.93E-02 | 3.17E-02 | 5.43E-01 |
| undecanedioate (C11-DC)                        | 2.31E-04  | 6.13E-03 | 9.70E-01 | 7.61E-04  | 1.41E-02 | 9.57E-01 | 3.63E-03  | 3.30E-02 | 9.13E-01 |
| glycerophosphoethanolamine                     | 5.52E-03  | 5.93E-03 | 3.53E-01 | 3.84E-03  | 1.37E-02 | 7.79E-01 | 4.74E-02  | 3.19E-02 | 1.39E-01 |
| 3-(3-hydroxyphenyl)propionate                  | 8.43E-03  | 5.77E-03 | 1.45E-01 | 2.81E-02  | 1.32E-02 | 3.48E-02 | 6.39E-02  | 3.10E-02 | 4.00E-02 |
| ectoine                                        | 1.74E-03  | 5.95E-03 | 7.71E-01 | 1.32E-02  | 1.37E-02 | 3.35E-01 | -1.76E-02 | 3.12E-02 | 5.83E-01 |
| 2-oleoyl-GPE (18:1)*                           | 9.69E-03  | 5.78E-03 | 9.46E-02 | 2.63E-02  | 1.33E-02 | 4.80E-02 | 5.25E-02  | 3.11E-02 | 9.28E-02 |
| 2-palmitoyl-GPE (16:0)*                        | 2.28E-03  | 6.00E-03 | 7.04E-01 | -2.19E-02 | 1.37E-02 | 1.12E-01 | 1.41E-02  | 3.23E-02 | 6.63E-01 |
| 1-arachidonoyl-GPI (20:4)*                     | -1.23E-02 | 6.04E-03 | 4.30E-02 | -5.27E-02 | 1.36E-02 | 1.39E-04 | -5.57E-02 | 3.26E-02 | 8.88E-02 |
| 1-palmitoyl-GPI (16:0)                         | 1.16E-03  | 5.95E-03 | 8.46E-01 | -9.76E-03 | 1.37E-02 | 4.76E-01 | -1.68E-02 | 3.21E-02 | 6.01E-01 |
| glycolithocholate sulfate*                     | 8.35E-03  | 5.86E-03 | 1.55E-01 | 1.40E-02  | 1.35E-02 | 3.02E-01 | -2.72E-02 | 3.16E-02 | 3.91E-01 |
| tauroolithocholate 3-sulfate                   | 7.82E-03  | 5.99E-03 | 1.92E-01 | 1.36E-02  | 1.38E-02 | 3.24E-01 | -4.71E-02 | 3.22E-02 | 1.45E-01 |

Supplementary Table 2: Parameter estimates for metabolome-wide association studies for diet-metabolite associations for each of: The Healthy Eating Index-2015 (HEI-15), DASH and AMED diet

|                                                     |           |          |          |           |          |          |           |          |          |
|-----------------------------------------------------|-----------|----------|----------|-----------|----------|----------|-----------|----------|----------|
| deoxycarnitine                                      | -1.04E-02 | 5.74E-03 | 7.07E-02 | 3.62E-03  | 1.33E-02 | 7.85E-01 | -3.46E-02 | 3.10E-02 | 2.65E-01 |
| N6-succinyladenosine                                | -2.08E-03 | 5.53E-03 | 7.07E-01 | -4.15E-03 | 1.27E-02 | 7.45E-01 | -2.34E-02 | 2.98E-02 | 4.33E-01 |
| 1-ribosyl-imidazoleacetate*                         | 6.01E-03  | 5.59E-03 | 2.83E-01 | 2.36E-02  | 1.28E-02 | 6.70E-02 | 7.11E-03  | 3.02E-02 | 8.14E-01 |
| 2-arachidonoyl-GPE (20:4)*                          | -1.45E-02 | 5.95E-03 | 1.56E-02 | -2.42E-02 | 1.38E-02 | 8.04E-02 | -4.41E-02 | 3.23E-02 | 1.74E-01 |
| leucylleucine                                       | 1.38E-03  | 5.83E-03 | 8.12E-01 | 5.91E-03  | 1.34E-02 | 6.60E-01 | -4.21E-02 | 3.13E-02 | 1.80E-01 |
| N2-acetyllysine                                     | -8.10E-03 | 4.09E-03 | 4.87E-02 | -1.47E-02 | 9.44E-03 | 1.20E-01 | -9.04E-03 | 2.22E-02 | 6.84E-01 |
| alpha-hydroxycaproate                               | -1.18E-03 | 4.91E-03 | 8.10E-01 | -1.56E-02 | 1.13E-02 | 1.68E-01 | -2.46E-02 | 2.64E-02 | 3.52E-01 |
| 3,4-dihydroxybutyrate                               | -9.63E-03 | 5.67E-03 | 9.08E-02 | -1.73E-02 | 1.31E-02 | 1.87E-01 | -5.91E-02 | 3.05E-02 | 5.39E-02 |
| indoleacetylglutamine                               | -8.85E-03 | 5.34E-03 | 9.87E-02 | -3.26E-02 | 1.22E-02 | 8.02E-03 | -2.08E-02 | 2.89E-02 | 4.72E-01 |
| hexanoylglutamine                                   | -1.10E-02 | 5.77E-03 | 5.75E-02 | -2.95E-02 | 1.33E-02 | 2.69E-02 | -6.54E-02 | 3.11E-02 | 3.62E-02 |
| N6-acetyllysine                                     | 4.19E-03  | 5.73E-03 | 4.65E-01 | 2.16E-02  | 1.31E-02 | 1.01E-01 | -3.01E-04 | 3.09E-02 | 9.92E-01 |
| dihomo-linolenate (20:3n3 or n6)                    | -1.24E-02 | 5.91E-03 | 3.74E-02 | -3.53E-02 | 1.36E-02 | 9.62E-03 | -6.97E-02 | 3.18E-02 | 2.95E-02 |
| mannitol/sorbitol                                   | 3.40E-03  | 5.94E-03 | 5.67E-01 | 1.87E-02  | 1.36E-02 | 1.72E-01 | 3.89E-02  | 3.20E-02 | 2.25E-01 |
| tryptophan betaine                                  | 2.19E-02  | 5.41E-03 | 6.66E-05 | 4.99E-02  | 1.25E-02 | 7.87E-05 | 1.06E-01  | 2.93E-02 | 3.52E-04 |
| 4-vinylphenol sulfate                               | 1.25E-02  | 6.00E-03 | 3.75E-02 | 4.36E-02  | 1.37E-02 | 1.62E-03 | 3.22E-02  | 3.25E-02 | 3.23E-01 |
| 4-ethylphenylsulfate                                | 1.15E-02  | 6.13E-03 | 6.26E-02 | 3.82E-02  | 1.40E-02 | 6.86E-03 | 1.24E-02  | 3.32E-02 | 7.10E-01 |
| thymol sulfate                                      | 8.65E-03  | 6.00E-03 | 1.50E-01 | -8.22E-03 | 1.38E-02 | 5.53E-01 | 2.72E-02  | 3.24E-02 | 4.02E-01 |
| 3-methyladipate                                     | 1.04E-02  | 5.18E-03 | 4.52E-02 | 2.73E-02  | 1.19E-02 | 2.27E-02 | 6.03E-02  | 2.79E-02 | 3.14E-02 |
| pyrraline                                           | 1.77E-02  | 5.84E-03 | 2.67E-03 | 5.13E-02  | 1.33E-02 | 1.45E-04 | 8.39E-02  | 3.16E-02 | 8.39E-03 |
| 2-linoleoyl-GPE (18:2)*                             | -3.02E-03 | 5.79E-03 | 6.03E-01 | 4.76E-03  | 1.33E-02 | 7.21E-01 | -3.00E-03 | 3.12E-02 | 9.23E-01 |
| 1-oleoyl-GPI (18:1)                                 | 1.27E-02  | 6.08E-03 | 3.78E-02 | 4.38E-03  | 1.41E-02 | 7.56E-01 | 6.30E-02  | 3.28E-02 | 5.60E-02 |
| 1-linoleoyl-GPI (18:2)*                             | -4.88E-03 | 5.88E-03 | 4.08E-01 | -3.42E-02 | 1.34E-02 | 1.13E-02 | -7.44E-03 | 3.17E-02 | 8.15E-01 |
| 1-palmitoleoyl-GPE (16:1)*                          | -1.26E-02 | 5.45E-03 | 2.18E-02 | -4.12E-02 | 1.24E-02 | 1.04E-03 | -7.09E-02 | 2.93E-02 | 1.62E-02 |
| 1-palmitoleoyl-GPI (16:1)*                          | -4.60E-03 | 5.15E-03 | 3.72E-01 | -4.27E-02 | 1.16E-02 | 2.75E-04 | -5.52E-02 | 2.76E-02 | 4.66E-02 |
| desmethylnaproxen                                   | 1.42E-03  | 3.09E-03 | 6.47E-01 | 9.43E-03  | 7.09E-03 | 1.85E-01 | 1.94E-03  | 1.67E-02 | 9.08E-01 |
| desmethylnaproxen sulfate                           | 2.10E-03  | 3.57E-03 | 5.57E-01 | 1.34E-02  | 8.18E-03 | 1.02E-01 | 1.07E-02  | 1.92E-02 | 5.79E-01 |
| 2-hydroxyacetaminophen sulfate*                     | 7.48E-03  | 4.51E-03 | 9.83E-02 | 2.48E-02  | 1.03E-02 | 1.69E-02 | 2.97E-02  | 2.43E-02 | 2.23E-01 |
| 2-methoxyacetaminophen sulfate*                     | 4.89E-03  | 3.93E-03 | 2.15E-01 | 1.85E-02  | 9.01E-03 | 4.10E-02 | 2.70E-02  | 2.12E-02 | 2.03E-01 |
| 2-methoxyacetaminophen glucuronide*                 | 4.12E-03  | 3.67E-03 | 2.63E-01 | 1.69E-02  | 8.41E-03 | 4.55E-02 | 1.86E-02  | 1.98E-02 | 3.49E-01 |
| 3-(cystein-5-yl)acetaminophen*                      | 5.25E-03  | 3.03E-03 | 8.40E-02 | 1.43E-02  | 6.95E-03 | 4.08E-02 | 1.24E-02  | 1.64E-02 | 4.49E-01 |
| o-cresol sulfate                                    | 3.71E-03  | 5.33E-03 | 4.87E-01 | -1.54E-02 | 1.22E-02 | 2.08E-01 | 2.37E-02  | 2.87E-02 | 4.09E-01 |
| dimethylarginine (SDMA + ADMA)                      | -3.60E-03 | 5.81E-03 | 5.36E-01 | 9.75E-04  | 1.34E-02 | 9.42E-01 | -4.16E-02 | 3.12E-02 | 1.84E-01 |
| gamma-glutamylalanine                               | -1.26E-02 | 5.67E-03 | 2.70E-02 | -1.25E-02 | 1.31E-02 | 3.41E-01 | -3.72E-02 | 3.07E-02 | 2.26E-01 |
| N-acetylserine                                      | -1.32E-03 | 6.09E-03 | 8.29E-01 | 2.78E-02  | 1.39E-02 | 4.72E-02 | -1.10E-02 | 3.28E-02 | 7.38E-01 |
| 1-stearoyl-2-oleoyl-GPE (18:0/18:1)                 | 1.19E-02  | 5.99E-03 | 4.84E-02 | 1.39E-02  | 1.38E-02 | 3.15E-01 | 8.09E-02  | 3.21E-02 | 1.24E-02 |
| chiro-inositol                                      | 1.47E-02  | 4.63E-03 | 1.67E-03 | 3.46E-02  | 1.07E-02 | 1.32E-03 | 6.75E-02  | 2.51E-02 | 7.60E-03 |
| 4-allylphenol sulfate                               | 1.68E-02  | 6.24E-03 | 7.42E-03 | 3.34E-02  | 1.44E-02 | 2.14E-02 | 5.93E-02  | 3.39E-02 | 8.13E-02 |
| 1-stearoyl-2-arachidonoyl-GPC (18:0/20:4)           | -8.65E-03 | 5.87E-03 | 1.41E-01 | -3.05E-02 | 1.34E-02 | 2.40E-02 | -2.52E-02 | 3.17E-02 | 4.27E-01 |
| 1-palmitoyl-2-linoleoyl-GPE (16:0/18:2)             | 4.73E-03  | 6.02E-03 | 4.33E-01 | -2.84E-03 | 1.39E-02 | 8.38E-01 | 1.93E-02  | 3.25E-02 | 5.52E-01 |
| 1-stearoyl-2-arachidonoyl-GPS (18:0/20:4)           | -2.17E-03 | 5.88E-03 | 7.12E-01 | 4.32E-03  | 1.35E-02 | 7.50E-01 | -2.98E-03 | 3.17E-02 | 9.25E-01 |
| sphinganine-1-phosphate                             | -4.89E-03 | 6.13E-03 | 4.25E-01 | -2.59E-04 | 1.41E-02 | 9.85E-01 | -1.97E-03 | 3.31E-02 | 9.53E-01 |
| glycosyl-N-nervonoyl-sphingosine (d18:1/24:1)*      | 2.11E-04  | 5.82E-03 | 9.71E-01 | -1.30E-02 | 1.34E-02 | 3.30E-01 | 3.80E-02  | 3.13E-02 | 2.25E-01 |
| glycosyl-N-stearoyl-sphingosine (d18:1/18:0)        | -1.28E-02 | 5.76E-03 | 2.68E-02 | -3.91E-02 | 1.32E-02 | 3.25E-03 | -4.31E-02 | 3.12E-02 | 1.69E-01 |
| cyclo(leu-pro)                                      | -1.06E-02 | 5.61E-03 | 6.09E-02 | -3.56E-02 | 1.28E-02 | 5.87E-03 | -2.85E-02 | 3.04E-02 | 3.50E-01 |
| succinylcarnitine (C4-DC)                           | -3.96E-03 | 5.91E-03 | 5.03E-01 | 2.11E-02  | 1.36E-02 | 1.21E-01 | -2.60E-02 | 3.18E-02 | 4.15E-01 |
| bilirubin (E,E)*                                    | -4.50E-03 | 5.61E-03 | 4.24E-01 | -9.58E-03 | 1.29E-02 | 4.59E-01 | 2.21E-03  | 3.03E-02 | 9.42E-01 |
| bilirubin (E,Z or Z,E)*                             | 2.79E-04  | 5.60E-03 | 9.60E-01 | -4.21E-03 | 1.29E-02 | 7.44E-01 | 1.43E-02  | 3.02E-02 | 6.35E-01 |
| N-methylproline                                     | 2.41E-02  | 6.02E-03 | 7.86E-05 | 6.36E-02  | 1.37E-02 | 5.55E-06 | 9.89E-02  | 3.28E-02 | 2.82E-03 |
| beta-cryptoxanthin                                  | 3.30E-02  | 5.51E-03 | 6.26E-09 | 5.92E-02  | 1.30E-02 | 7.86E-06 | 1.48E-01  | 3.03E-02 | 1.69E-06 |
| 5alpha-androstan-3beta,17beta-diol disulfate        | -1.47E-02 | 4.88E-03 | 2.92E-03 | -4.16E-02 | 1.11E-02 | 2.26E-04 | -4.41E-02 | 2.66E-02 | 9.90E-02 |
| 5alpha-pregnan-3beta,20alpha-diol disulfate         | -9.45E-03 | 6.13E-03 | 1.24E-01 | -1.82E-02 | 1.41E-02 | 1.98E-01 | -7.66E-02 | 3.29E-02 | 2.05E-02 |
| glycocholate sulfate*                               | -1.25E-02 | 5.53E-03 | 2.45E-02 | -2.02E-02 | 1.28E-02 | 1.15E-01 | -6.58E-02 | 2.98E-02 | 2.80E-02 |
| taurocholate sulfate*                               | -2.61E-03 | 5.97E-03 | 6.62E-01 | -2.03E-02 | 1.37E-02 | 1.40E-01 | -4.99E-02 | 3.21E-02 | 1.20E-01 |
| androstenediol (3beta,17beta) disulfate (1)         | -1.51E-02 | 5.26E-03 | 4.31E-03 | -5.48E-02 | 1.18E-02 | 5.49E-06 | -5.89E-02 | 2.85E-02 | 3.98E-02 |
| pregnenediol disulfate (C21H34O8S2)*                | -1.20E-02 | 5.39E-03 | 2.66E-02 | -3.42E-02 | 1.23E-02 | 5.93E-03 | -6.69E-02 | 2.90E-02 | 2.20E-02 |
| androstenediol (3beta,17beta) disulfate (2)         | -1.96E-02 | 5.11E-03 | 1.56E-04 | -3.43E-02 | 1.19E-02 | 4.21E-03 | -9.64E-02 | 2.76E-02 | 5.71E-04 |
| 21-hydroxypregnenolone disulfate                    | -1.07E-02 | 5.72E-03 | 6.34E-02 | -2.27E-02 | 1.32E-02 | 8.55E-02 | -6.08E-02 | 3.08E-02 | 4.94E-02 |
| 5alpha-androstan-3alpha,17alpha-diol monosulfate    | -8.17E-03 | 4.88E-03 | 9.52E-02 | 7.90E-04  | 1.13E-02 | 9.44E-01 | -4.44E-02 | 2.63E-02 | 9.24E-02 |
| 5alpha-pregnan-3beta,20beta-diol monosulfate (1)    | -1.03E-02 | 5.85E-03 | 7.86E-02 | -1.73E-02 | 1.35E-02 | 2.01E-01 | -8.26E-02 | 3.13E-02 | 8.83E-03 |
| 5alpha-pregnan-3beta,20alpha-diol monosulfate (2)   | -5.47E-03 | 5.93E-03 | 3.57E-01 | -2.97E-03 | 1.37E-02 | 8.28E-01 | -6.22E-02 | 3.18E-02 | 5.14E-02 |
| 5alpha-pregnan-diol disulfate                       | -1.35E-02 | 4.88E-03 | 6.10E-03 | -2.41E-02 | 1.13E-02 | 3.35E-02 | -6.76E-02 | 2.64E-02 | 1.09E-02 |
| 5alpha-androstan-3alpha,17beta-diol disulfate       | -5.67E-03 | 4.48E-03 | 2.07E-01 | -9.11E-03 | 1.03E-02 | 3.78E-01 | -4.39E-02 | 2.41E-02 | 6.94E-02 |
| 5alpha-androstan-3alpha,17beta-diol monosulfate (1) | -1.43E-02 | 5.64E-03 | 1.16E-02 | -3.31E-02 | 1.30E-02 | 1.12E-02 | -5.00E-02 | 3.06E-02 | 1.03E-01 |
| 5alpha-androstan-3beta,17alpha-diol disulfate       | -7.08E-03 | 5.41E-03 | 1.92E-01 | -7.64E-03 | 1.25E-02 | 5.41E-01 | -2.08E-02 | 2.92E-02 | 4.77E-01 |
| 5alpha-androstan-3beta,17beta-diol monosulfate (2)  | -1.16E-02 | 5.28E-03 | 2.94E-02 | -3.12E-02 | 1.21E-02 | 1.06E-02 | -3.48E-02 | 2.86E-02 | 2.25E-01 |
| androstenediol (3alpha, 17alpha) monosulfate (2)    | -1.36E-02 | 5.06E-03 | 7.55E-03 | -4.36E-03 | 1.18E-02 | 7.12E-01 | -7.47E-02 | 2.73E-02 | 6.52E-03 |
| androstenediol (3alpha, 17alpha) monosulfate (3)    | -1.68E-02 | 5.00E-03 | 8.94E-04 | -3.26E-02 | 1.16E-02 | 5.21E-03 | -8.33E-02 | 2.71E-02 | 2.27E-03 |
| androstenediol (3beta,17beta) monosulfate (1)       | -1.25E-02 | 5.27E-03 | 1.86E-02 | -3.43E-02 | 1.21E-02 | 4.82E-03 | -5.85E-02 | 2.85E-02 | 4.06E-02 |
| androstenediol (3beta,17beta) monosulfate (2)       | -1.22E-02 | 5.46E-03 | 2.60E-02 | -2.86E-02 | 1.26E-02 | 2.35E-02 | -2.82E-02 | 2.96E-02 | 3.42E-01 |
| 5alpha-pregnan-3beta-ol,20-one sulfate              | 4.06E-04  | 4.27E-03 | 9.24E-01 | -2.92E-03 | 9.82E-03 | 7.66E-01 | -8.53E-03 | 2.30E-02 | 7.11E-01 |
| 4-hydroxycoumarin                                   | 1.20E-02  | 5.64E-03 | 3.42E-02 | 1.77E-02  | 1.30E-02 | 1.76E-01 | 2.11E-02  | 3.06E-02 | 4.92E-01 |
| 1-docosahexaenoyl-GPE (22:6)*                       | 3.96E-03  | 5.67E-03 | 4.85E-01 | -2.54E-02 | 1.30E-02 | 5.10E-02 | 5.99E-02  | 3.04E-02 | 4.93E-02 |
| 2-docosahexaenoyl-GPE (22:6)*                       | 1.43E-03  | 5.73E-03 | 8.03E-01 | -1.45E-02 | 1.32E-02 | 2.71E-01 | 1.30E-02  | 3.09E-02 | 6.74E-01 |
| 1-docosapentaenoyl-GPC (22:5n3)*                    | -6.58E-04 | 6.01E-03 | 9.13E-01 | 5.27E-03  | 1.38E-02 | 7.04E-01 | 2.24E-02  | 3.24E-02 | 4.90E-01 |
| 1-docosapentaenoyl-GPE (22:5n6)*                    | -2.13E-02 | 5.69E-03 | 2.22E-04 | -4.79E-02 | 1.31E-02 | 3.16E-04 | -1.06E-01 | 3.08E-02 | 6.95E-04 |
| pregnenediol sulfate (C21H34O5S)*                   | -6.72E-03 | 5.58E-03 | 2.29E-01 | -1.77E-02 | 1.28E-02 | 1.70E-01 | -5.26E-02 | 3.00E-02 | 8.02E-02 |
| 2-hydroxyglutarate                                  | -7.91E-03 | 6.14E-03 | 1.99E-01 | -3.33E-02 | 1.40E-02 | 1.82E-02 | 4.59E-04  | 3.32E-02 | 9.89E-01 |
| gamma-CEHC                                          | -9.83E-03 | 5.87E-03 | 9.51E-02 | 9.26E-03  | 1.36E-02 | 4.96E-01 | -4.31E-02 | 3.17E-02 | 1.75E-01 |
| N-acetyl-beta-alanine                               | 1.01E-02  | 5.46E-03 | 6.60E-02 | 1.58E-02  | 1.26E-02 | 2.10E-01 | 5.94E-02  | 2.94E-02 | 4.42E-02 |
| 5-methylthioribose**                                | 9.92E-04  | 5.65E-03 | 8.61E-01 | 2.53E-02  | 1.29E-02 | 5.11E-02 | 5.08E-03  | 3.04E-02 | 8.68E-01 |
| sphingomyelin (d18:1/18:1, d18:2/18:0)              | -2.26E-02 | 5.28E-03 | 2.60E-05 | -5.08E-02 | 1.22E-02 | 4.03E-05 | -7.26E-02 | 2.91E-02 | 1.30E-02 |
| palmitoyl sphingomyelin (d18:1/16:0)                | -7.35E-04 | 5.89E-03 | 9.01E-01 | -1.05E-02 | 1.36E-02 | 4.39E-01 | 1.20E-02  | 3.18E-02 | 7.05E-01 |
| cysteine sulfinic acid                              | -1.71E-02 | 5.00E-03 | 7.52E-04 | -4.69E-02 | 1.14E-02 | 5.21E-05 | -6.33E-02 | 2.73E-02 | 2.09E-02 |
| 3-hydroxyhippurate                                  | 1.13E-02  | 5.88E-03 | 5.51E-02 | 2.87E-02  | 1.35E-02 | 3.50E-02 | 7.19E-02  | 3.16E-02 | 2.38E-02 |

Supplementary Table 2: Parameter estimates for metabolome-wide association studies for diet-metabolite associations for each of: The Healthy Eating Index-2015 (HEI-15), DASH and AMED diet

|                                             |           |          |          |           |          |          |           |          |          |
|---------------------------------------------|-----------|----------|----------|-----------|----------|----------|-----------|----------|----------|
| 16a-hydroxy DHEA 3-sulfate                  | -1.41E-02 | 5.77E-03 | 1.51E-02 | -1.43E-02 | 1.34E-02 | 2.88E-01 | -9.58E-02 | 3.09E-02 | 2.13E-03 |
| 17alpha-hydroxypregnenolone 3-sulfate       | -1.01E-02 | 4.87E-03 | 3.91E-02 | -2.04E-02 | 1.12E-02 | 6.95E-02 | -8.41E-02 | 2.59E-02 | 1.33E-03 |
| pregnenolone sulfate                        | -8.02E-03 | 5.68E-03 | 1.59E-01 | -2.33E-02 | 1.31E-02 | 7.47E-02 | -7.16E-02 | 3.04E-02 | 1.92E-02 |
| 5-HEPE                                      | 1.78E-03  | 5.27E-03 | 7.36E-01 | -7.69E-03 | 1.21E-02 | 5.26E-01 | 4.15E-02  | 2.83E-02 | 1.43E-01 |
| 5-HETE                                      | -7.24E-03 | 5.57E-03 | 1.95E-01 | -2.83E-02 | 1.27E-02 | 2.73E-02 | -2.89E-02 | 3.01E-02 | 3.37E-01 |
| andro steroid monosulfate C19H28O6S (1)*    | -1.27E-02 | 5.47E-03 | 2.07E-02 | -1.87E-02 | 1.27E-02 | 1.41E-01 | -8.99E-02 | 2.93E-02 | 2.35E-03 |
| ergothioneine                               | 1.72E-02  | 5.65E-03 | 2.61E-03 | 4.43E-03  | 1.32E-02 | 7.38E-01 | 8.64E-02  | 3.05E-02 | 4.99E-03 |
| 1-margaroyl-GPE (17:0)*                     | 7.03E-03  | 5.77E-03 | 2.24E-01 | 2.33E-02  | 1.32E-02 | 7.98E-02 | -4.39E-03 | 3.12E-02 | 8.88E-01 |
| 1-pentadecanoyl-GPC (15:0)*                 | -7.28E-04 | 5.42E-03 | 8.93E-01 | 2.13E-02  | 1.24E-02 | 8.81E-02 | -5.75E-02 | 2.90E-02 | 4.86E-02 |
| 5-methylmethionine                          | 1.56E-02  | 5.08E-03 | 2.37E-03 | 4.32E-02  | 1.16E-02 | 2.38E-04 | 1.26E-01  | 2.68E-02 | 4.07E-06 |
| indole-3-carboxylate                        | 1.19E-02  | 5.89E-03 | 4.45E-02 | 2.73E-02  | 1.36E-02 | 4.49E-02 | -1.08E-03 | 3.20E-02 | 9.73E-01 |
| 13-HODE + 9-HODE                            | -4.01E-03 | 5.78E-03 | 4.88E-01 | -9.58E-03 | 1.33E-02 | 4.72E-01 | -2.11E-03 | 3.12E-02 | 9.46E-01 |
| tridecenedioate (C13:1-DC)*                 | -2.27E-02 | 5.52E-03 | 5.11E-05 | -2.58E-02 | 1.30E-02 | 4.80E-02 | -1.38E-01 | 2.95E-02 | 4.22E-06 |
| N-acetyl-3-methylhistidine*                 | -8.79E-03 | 5.76E-03 | 1.28E-01 | -1.81E-02 | 1.33E-02 | 1.75E-01 | -4.73E-02 | 3.11E-02 | 1.29E-01 |
| 4-cholesten-3-one                           | 5.33E-03  | 5.97E-03 | 3.73E-01 | -1.60E-02 | 1.37E-02 | 2.45E-01 | 1.59E-02  | 3.22E-02 | 6.23E-01 |
| cinnamoylglycine                            | 1.80E-02  | 5.65E-03 | 1.60E-03 | 3.94E-02  | 1.30E-02 | 2.71E-03 | 6.37E-02  | 3.08E-02 | 3.93E-02 |
| stearoyl ethanolamide                       | -7.53E-03 | 5.82E-03 | 1.97E-01 | -2.02E-02 | 1.34E-02 | 1.32E-01 | -2.88E-02 | 3.14E-02 | 3.60E-01 |
| cis-4-decenoylcarnitine (C10:1)             | -1.13E-02 | 5.90E-03 | 5.74E-02 | -2.61E-02 | 1.36E-02 | 5.59E-02 | -1.97E-02 | 3.20E-02 | 5.39E-01 |
| 2S,3R-dihydroxybutyrate                     | -2.64E-03 | 5.36E-03 | 6.22E-01 | -1.92E-02 | 1.23E-02 | 1.20E-01 | 5.07E-03  | 2.89E-02 | 8.61E-01 |
| phenylalanylphenylalanine                   | 1.16E-02  | 6.05E-03 | 5.58E-02 | 3.62E-02  | 1.38E-02 | 9.43E-03 | 3.00E-02  | 3.28E-02 | 3.61E-01 |
| (12 or 13)-methylmyristate (a15:0 or i15:0) | -2.12E-02 | 5.61E-03 | 1.92E-04 | -3.36E-02 | 1.31E-02 | 1.06E-02 | -1.14E-01 | 3.02E-02 | 1.87E-04 |
| (16 or 17)-methylstearate (a19:0 or i19:0)  | -1.87E-02 | 5.79E-03 | 1.40E-03 | -4.75E-02 | 1.33E-02 | 4.04E-04 | -1.01E-01 | 3.12E-02 | 1.39E-03 |
| 2R,3R-dihydroxybutyrate                     | -1.21E-02 | 6.05E-03 | 4.71E-02 | -1.52E-02 | 1.40E-02 | 2.79E-01 | -5.83E-02 | 3.27E-02 | 7.51E-02 |
| 4-methylbenzenesulfonate                    | -2.58E-03 | 5.55E-03 | 6.42E-01 | 3.79E-03  | 1.28E-02 | 7.67E-01 | -1.17E-02 | 2.99E-02 | 6.96E-01 |
| alpha-ketoglutarate*                        | 1.15E-02  | 5.62E-03 | 4.24E-02 | 3.67E-02  | 1.28E-02 | 4.63E-03 | 4.68E-02  | 3.04E-02 | 1.25E-01 |
| metformin                                   | 4.46E-04  | 1.06E-03 | 6.73E-01 | 1.43E-03  | 2.43E-03 | 5.57E-01 | -3.07E-03 | 5.69E-03 | 5.90E-01 |
| ibuprofen acyl glucuronide                  | 2.22E-03  | 3.25E-03 | 4.95E-01 | -1.03E-02 | 7.47E-03 | 1.70E-01 | 9.95E-04  | 1.75E-02 | 9.55E-01 |
| 3-hydroxyquinine                            | -4.87E-04 | 1.06E-03 | 6.46E-01 | -1.30E-03 | 2.44E-03 | 5.95E-01 | -1.62E-03 | 5.71E-03 | 7.76E-01 |
| 2,3-dihydroxyisovalerate                    | 9.67E-03  | 5.58E-03 | 8.44E-02 | -2.17E-02 | 1.29E-02 | 9.25E-02 | 1.89E-02  | 3.02E-02 | 5.33E-01 |
| allopurinol riboside                        | -2.31E-03 | 1.04E-03 | 2.81E-02 | -1.19E-04 | 2.43E-03 | 9.61E-01 | -1.23E-02 | 5.63E-03 | 2.92E-02 |
| 3-methylglutaconate                         | 1.12E-03  | 5.51E-03 | 8.39E-01 | 2.70E-02  | 1.26E-02 | 3.26E-02 | -2.34E-02 | 2.96E-02 | 4.30E-01 |
| cysteinylglycine disulfide*                 | -2.16E-02 | 5.70E-03 | 1.90E-04 | -3.61E-02 | 1.33E-02 | 6.98E-03 | -1.11E-01 | 3.08E-02 | 3.53E-04 |
| isoursodeoxycholate                         | -1.51E-02 | 6.04E-03 | 1.30E-02 | -2.80E-02 | 1.40E-02 | 4.61E-02 | -3.53E-02 | 3.29E-02 | 2.84E-01 |
| oxypurinol                                  | -2.31E-03 | 1.04E-03 | 2.81E-02 | -1.19E-04 | 2.43E-03 | 9.61E-01 | -1.23E-02 | 5.63E-03 | 2.92E-02 |
| formiminoglutamate                          | -9.68E-03 | 4.94E-03 | 5.11E-02 | -3.27E-02 | 1.13E-02 | 4.08E-03 | -3.80E-02 | 2.67E-02 | 1.56E-01 |
| hydantoin-5-propionate                      | 4.62E-03  | 6.04E-03 | 4.44E-01 | 3.99E-02  | 1.37E-02 | 3.86E-03 | -2.04E-02 | 3.25E-02 | 5.32E-01 |
| sulfate*                                    | 9.22E-03  | 6.15E-03 | 1.35E-01 | 2.51E-02  | 1.41E-02 | 7.70E-02 | 3.21E-02  | 3.32E-02 | 3.35E-01 |
| 4-hydroxy-2-oxoglutaric acid                | 1.93E-03  | 5.82E-03 | 7.40E-01 | 1.68E-02  | 1.34E-02 | 2.11E-01 | 3.37E-03  | 3.14E-02 | 9.14E-01 |
| 4-hydroxyglutamate                          | -7.47E-04 | 5.24E-03 | 8.87E-01 | 4.39E-03  | 1.21E-02 | 7.16E-01 | -2.43E-02 | 2.82E-02 | 3.89E-01 |
| L-urobilin                                  | -1.67E-03 | 5.34E-03 | 7.55E-01 | -6.17E-03 | 1.23E-02 | 6.16E-01 | -5.95E-02 | 2.86E-02 | 3.80E-02 |
| pantoate                                    | 1.33E-02  | 5.94E-03 | 2.65E-02 | 3.35E-02  | 1.36E-02 | 1.46E-02 | 2.48E-02  | 3.23E-02 | 4.43E-01 |
| hydroxycotinine                             | -3.41E-03 | 2.89E-03 | 2.38E-01 | -1.59E-02 | 6.59E-03 | 1.68E-02 | -9.35E-03 | 1.56E-02 | 5.49E-01 |
| cotinine N-oxide                            | -2.71E-03 | 2.89E-03 | 3.48E-01 | -1.42E-02 | 6.60E-03 | 3.25E-02 | -5.77E-03 | 1.56E-02 | 7.11E-01 |
| omeprazole                                  | 5.06E-04  | 1.05E-03 | 6.30E-01 | 1.23E-03  | 2.41E-03 | 6.11E-01 | 2.76E-04  | 5.65E-03 | 9.61E-01 |
| atenolol                                    | 2.34E-03  | 1.59E-03 | 1.42E-01 | 7.38E-03  | 3.65E-03 | 4.39E-02 | -1.21E-02 | 8.57E-03 | 1.59E-01 |
| diphenhydramine                             | -3.52E-03 | 3.46E-03 | 3.09E-01 | 4.20E-03  | 7.96E-03 | 5.99E-01 | -1.14E-02 | 1.86E-02 | 5.40E-01 |
| hydrochlorothiazide                         | 1.41E-03  | 3.54E-03 | 6.90E-01 | -3.03E-04 | 8.14E-03 | 9.70E-01 | 7.24E-03  | 1.91E-02 | 7.04E-01 |
| pseudoephedrine                             | 6.60E-20  | 1.01E-19 | 5.12E-01 | 5.38E-19  | 2.29E-19 | 1.98E-02 | 3.95E-19  | 5.42E-19 | 4.67E-01 |
| 5-methylcysteine                            | 4.79E-03  | 6.08E-03 | 4.31E-01 | 1.67E-02  | 1.40E-02 | 2.34E-01 | 7.23E-02  | 3.25E-02 | 2.70E-02 |
| androsterone glucuronide                    | -9.46E-03 | 5.11E-03 | 6.50E-02 | 4.35E-03  | 1.18E-02 | 7.14E-01 | -5.02E-02 | 2.75E-02 | 6.94E-02 |
| argininate*                                 | 1.87E-02  | 5.85E-03 | 1.56E-03 | 4.03E-02  | 1.35E-02 | 3.05E-03 | 9.86E-02  | 3.16E-02 | 1.97E-03 |
| solanidine                                  | -1.32E-03 | 4.79E-03 | 7.83E-01 | -8.17E-03 | 1.10E-02 | 4.59E-01 | 2.67E-02  | 2.58E-02 | 3.02E-01 |
| 2-oxoarginine*                              | 1.41E-02  | 5.79E-03 | 1.54E-02 | 3.97E-02  | 1.33E-02 | 3.01E-03 | 4.74E-02  | 3.14E-02 | 1.32E-01 |
| cis-4-decenoate (10:1n6)*                   | -1.25E-02 | 5.96E-03 | 3.64E-02 | -3.90E-02 | 1.36E-02 | 4.49E-03 | -3.60E-02 | 3.23E-02 | 2.65E-01 |
| atorvastatin (lipitor)                      | 5.19E-04  | 3.19E-03 | 8.71E-01 | -3.71E-03 | 7.34E-03 | 6.14E-01 | -4.40E-03 | 1.72E-02 | 7.98E-01 |
| sertraline                                  | -1.11E-03 | 2.52E-03 | 6.59E-01 | -7.18E-03 | 5.78E-03 | 2.15E-01 | -5.86E-03 | 1.36E-02 | 6.66E-01 |
| gabapentin                                  | -5.21E-04 | 2.89E-03 | 8.57E-01 | -2.68E-03 | 6.65E-03 | 6.87E-01 | -3.85E-03 | 1.56E-02 | 8.05E-01 |
| venlafaxine                                 | 1.33E-03  | 1.05E-03 | 2.09E-01 | -2.06E-04 | 2.43E-03 | 9.33E-01 | 9.77E-03  | 5.67E-03 | 8.58E-02 |
| quetiapine                                  | 6.98E-04  | 1.03E-03 | 4.99E-01 | -1.28E-03 | 2.38E-03 | 5.90E-01 | -6.11E-03 | 5.55E-03 | 2.72E-01 |
| ethyl glucuronide                           | 8.03E-03  | 5.58E-03 | 1.52E-01 | -4.28E-02 | 1.26E-02 | 8.13E-04 | 3.49E-02  | 3.01E-02 | 2.47E-01 |
| 1-behenoyl-GPC (22:0)                       | 3.52E-02  | 5.64E-03 | 1.61E-09 | 6.02E-02  | 1.34E-02 | 1.00E-05 | 1.96E-01  | 3.03E-02 | 3.81E-10 |
| 1-erucoyl-GPC (22:1)*                       | 2.39E-02  | 5.36E-03 | 1.21E-05 | 2.35E-02  | 1.27E-02 | 6.51E-02 | 1.28E-01  | 2.89E-02 | 1.41E-05 |
| 1-adrenoyl-GPC (22:4)*                      | -1.41E-02 | 5.61E-03 | 1.27E-02 | -2.38E-02 | 1.30E-02 | 6.78E-02 | -7.69E-02 | 3.02E-02 | 1.15E-02 |
| 1-lignoceroyl-GPC (24:0)                    | 3.57E-02  | 5.43E-03 | 2.39E-10 | 6.23E-02  | 1.29E-02 | 2.27E-06 | 2.16E-01  | 2.86E-02 | 6.89E-13 |
| 1-nervonoyl-GPC (24:1n9)*                   | 2.46E-02  | 5.08E-03 | 2.14E-06 | 1.60E-02  | 1.21E-02 | 1.89E-01 | 1.36E-01  | 2.73E-02 | 1.00E-06 |
| 1-(1-enyl-palmitoyl)-GPC (P-16:0)*          | 7.68E-03  | 6.02E-03 | 2.03E-01 | 6.48E-04  | 1.39E-02 | 9.63E-01 | 3.43E-02  | 3.25E-02 | 2.91E-01 |
| 1-(1-enyl-oleoyl)-GPC (P-18:1)*             | 1.58E-02  | 5.74E-03 | 6.16E-03 | 1.28E-02  | 1.34E-02 | 3.38E-01 | 1.04E-01  | 3.07E-02 | 7.92E-04 |
| 1-(1-enyl-stearoyl)-GPC (P-18:0)*           | 3.31E-03  | 5.40E-03 | 5.40E-01 | 3.97E-03  | 1.24E-02 | 7.50E-01 | 1.51E-02  | 2.91E-02 | 6.05E-01 |
| 1-methyl-5-imidazoleacetate                 | -9.87E-04 | 6.00E-03 | 8.69E-01 | 5.59E-03  | 1.38E-02 | 6.85E-01 | -5.10E-02 | 3.22E-02 | 1.14E-01 |
| glycoursodeoxycholate                       | -1.06E-02 | 6.15E-03 | 8.53E-02 | -2.78E-02 | 1.41E-02 | 4.98E-02 | -5.78E-02 | 3.31E-02 | 8.19E-02 |
| tauroursodeoxycholate                       | -7.86E-03 | 4.80E-03 | 1.03E-01 | -2.08E-02 | 1.10E-02 | 6.05E-02 | -3.79E-02 | 2.59E-02 | 1.45E-01 |
| 5-methylcysteine sulfoxide                  | 1.81E-02  | 5.89E-03 | 2.28E-03 | 4.18E-02  | 1.36E-02 | 2.23E-03 | 1.12E-01  | 3.16E-02 | 4.79E-04 |
| benzoyllecgonine                            | -1.59E-03 | 2.00E-03 | 4.29E-01 | -2.57E-03 | 4.62E-03 | 5.78E-01 | 4.84E-03  | 1.08E-02 | 6.55E-01 |
| (14 or 15)-methylpalmitate (a17:0 or i17:0) | -2.42E-02 | 5.69E-03 | 2.82E-05 | -4.84E-02 | 1.32E-02 | 3.00E-04 | -1.37E-01 | 3.06E-02 | 1.07E-05 |
| eicosanedioate (C20-DC)                     | -1.22E-02 | 6.10E-03 | 4.57E-02 | -1.81E-02 | 1.41E-02 | 2.01E-01 | -3.79E-02 | 3.30E-02 | 2.52E-01 |
| docosadioate (C22-DC)                       | -8.66E-03 | 6.23E-03 | 1.65E-01 | -4.53E-03 | 1.44E-02 | 7.53E-01 | -4.78E-02 | 3.36E-02 | 1.55E-01 |
| 16-hydroxypalmitate                         | -1.47E-02 | 5.91E-03 | 1.32E-02 | -3.31E-02 | 1.36E-02 | 1.57E-02 | -6.90E-02 | 3.19E-02 | 3.16E-02 |
| quinine                                     | -4.87E-04 | 1.06E-03 | 6.46E-01 | -1.30E-03 | 2.44E-03 | 5.95E-01 | -1.62E-03 | 5.17E-03 | 7.76E-01 |
| oleoyl-linoleoyl-glycerol (18:1/18:2) [1]   | 6.52E-03  | 5.80E-03 | 2.62E-01 | 1.46E-02  | 1.33E-02 | 2.74E-01 | 1.24E-02  | 3.13E-02 | 6.93E-01 |
| oleoyl-linoleoyl-glycerol (18:1/18:2) [2]   | 9.15E-03  | 5.83E-03 | 1.18E-01 | 1.64E-02  | 1.35E-02 | 2.23E-01 | 3.06E-02  | 3.15E-02 | 3.32E-01 |
| 1-(1-enyl-palmitoyl)-GPE (P-16:0)*          | -1.84E-03 | 5.99E-03 | 7.59E-01 | -1.00E-02 | 1.38E-02 | 4.68E-01 | 7.96E-03  | 3.23E-02 | 8.05E-01 |
| 1-(1-enyl-stearoyl)-GPE (P-18:0)*           | -1.24E-03 | 6.03E-03 | 8.37E-01 | -7.75E-03 | 1.39E-02 | 5.77E-01 | 2.80E-02  | 3.25E-02 | 3.89E-01 |
| 2-stearoyl-GPI (18:0)*                      | 7.04E-03  | 5.87E-03 | 2.31E-01 | 7.57E-03  | 1.35E-02 | 5.76E-01 | 4.83E-02  | 3.16E-02 | 1.27E-01 |
| alpha-CEHC glucuronide*                     | 1.15E-02  | 5.12E-03 | 2.58E-02 | 2.04E-02  | 1.18E-02 | 8.52E-02 | 5.02E-03  | 2.78E-02 | 8.57E-01 |

Supplementary Table 2: Parameter estimates for metabolome-wide association studies for diet-metabolite associations for each of: The Healthy Eating Index-2015 (HEI-15), DASH and AMED diet

|                                         |           |          |          |           |          |          |           |          |          |
|-----------------------------------------|-----------|----------|----------|-----------|----------|----------|-----------|----------|----------|
| 2-oxindole-3-acetate                    | 6.67E-03  | 5.58E-03 | 2.33E-01 | 1.46E-02  | 1.28E-02 | 2.55E-01 | 3.44E-02  | 3.01E-02 | 2.54E-01 |
| N-oleoyltaurine                         | 9.78E-03  | 5.90E-03 | 9.82E-02 | 1.07E-02  | 1.36E-02 | 4.34E-01 | 3.04E-02  | 3.19E-02 | 3.42E-01 |
| linoleoylcarnitine (C18:2)*             | -7.25E-03 | 5.93E-03 | 2.22E-01 | -1.52E-02 | 1.36E-02 | 2.66E-01 | -3.27E-03 | 3.20E-02 | 9.19E-01 |
| isoleucylglycine                        | 6.81E-04  | 6.02E-03 | 9.10E-01 | 1.43E-02  | 1.38E-02 | 3.01E-01 | 2.98E-02  | 3.24E-02 | 3.59E-01 |
| leucylglycine                           | -1.76E-03 | 6.02E-03 | 7.70E-01 | 1.44E-02  | 1.38E-02 | 2.99E-01 | 3.12E-02  | 3.24E-02 | 3.36E-01 |
| phenylalanyl isoleucine                 | 3.72E-03  | 4.91E-03 | 4.50E-01 | 1.81E-02  | 1.13E-02 | 1.10E-01 | 2.55E-02  | 2.65E-02 | 3.36E-01 |
| phenylalanylleucine                     | 5.36E-03  | 6.32E-03 | 3.97E-01 | 1.34E-02  | 1.45E-02 | 3.59E-01 | 9.44E-03  | 3.41E-02 | 7.82E-01 |
| N-palmitoyltaurine                      | 4.28E-03  | 5.26E-03 | 4.16E-01 | 4.84E-03  | 1.21E-02 | 6.90E-01 | -7.81E-03 | 2.84E-02 | 7.83E-01 |
| N-stearoyltaurine                       | -5.98E-03 | 5.95E-03 | 3.16E-01 | -7.95E-03 | 1.37E-02 | 5.63E-01 | -2.74E-02 | 3.21E-02 | 3.94E-01 |
| 2-O-methylascorbic acid                 | 6.34E-03  | 5.74E-03 | 2.70E-01 | 1.76E-02  | 1.32E-02 | 1.82E-01 | -1.61E-02 | 3.10E-02 | 6.04E-01 |
| beta-citrylglytamate                    | -1.16E-02 | 6.12E-03 | 5.94E-02 | -2.18E-02 | 1.41E-02 | 1.25E-01 | -1.75E-02 | 3.32E-02 | 5.99E-01 |
| rosuvastatin                            | -7.03E-05 | 2.16E-03 | 9.74E-01 | 3.39E-05  | 4.98E-03 | 9.95E-01 | 7.63E-03  | 1.17E-02 | 5.13E-01 |
| trimethylamine N-oxide                  | -4.41E-04 | 5.94E-03 | 9.41E-01 | 9.72E-04  | 1.37E-02 | 9.43E-01 | 1.12E-02  | 3.20E-02 | 7.26E-01 |
| N6-methyllysine                         | -1.94E-03 | 5.39E-03 | 7.19E-01 | -1.37E-02 | 1.24E-02 | 2.68E-01 | 2.41E-02  | 2.90E-02 | 4.08E-01 |
| dihydroferulate                         | 9.10E-03  | 5.02E-03 | 7.06E-02 | 2.73E-02  | 1.15E-02 | 1.82E-02 | 4.08E-02  | 2.71E-02 | 1.33E-01 |
| imidazole propionate                    | -5.07E-03 | 5.95E-03 | 3.95E-01 | -1.30E-02 | 1.37E-02 | 3.44E-01 | -2.11E-03 | 3.21E-02 | 9.48E-01 |
| citalopram/escitalopram                 | -3.93E-03 | 2.78E-03 | 1.58E-01 | -2.12E-03 | 6.41E-03 | 7.42E-01 | -4.26E-03 | 1.50E-02 | 7.77E-01 |
| duloxetine                              | 6.60E-20  | 1.01E-19 | 5.12E-01 | 5.38E-19  | 2.29E-19 | 1.98E-02 | 3.95E-19  | 5.42E-19 | 4.67E-01 |
| milnacipran                             | 6.50E-04  | 1.06E-03 | 5.41E-01 | 4.24E-03  | 2.43E-03 | 8.20E-02 | -5.30E-03 | 5.71E-03 | 3.54E-01 |
| pregnanediol-3-glucuronide              | 1.24E-03  | 5.94E-03 | 8.34E-01 | -7.59E-03 | 1.37E-02 | 5.79E-01 | -3.21E-02 | 3.19E-02 | 3.16E-01 |
| (15:2)-anacardic acid                   | 2.10E-03  | 2.52E-03 | 4.07E-01 | 4.57E-03  | 5.81E-03 | 4.32E-01 | -3.35E-03 | 1.36E-02 | 8.06E-01 |
| alliin                                  | 2.78E-03  | 5.03E-03 | 5.81E-01 | -1.18E-02 | 1.16E-02 | 3.07E-01 | 5.31E-02  | 2.69E-02 | 4.95E-02 |
| seryltyrosine                           | 7.11E-03  | 3.87E-03 | 6.72E-02 | 8.90E-03  | 5.20E-02 | 2.72E-02 | 2.72E-02  | 2.09E-02 | 1.95E-01 |
| histidylalanine                         | 4.44E-03  | 4.05E-03 | 2.73E-01 | 1.05E-02  | 9.31E-03 | 2.61E-01 | 2.16E-02  | 2.18E-02 | 3.24E-01 |
| phenylalanylglycine                     | 7.58E-03  | 5.48E-03 | 1.68E-01 | 1.10E-02  | 1.26E-02 | 3.85E-01 | 3.32E-02  | 2.96E-02 | 2.63E-01 |
| phenylalanylmethionine                  | 9.53E-03  | 6.13E-03 | 1.22E-01 | 2.92E-02  | 1.41E-02 | 3.92E-02 | 1.16E-02  | 3.32E-02 | 7.26E-01 |
| phenylalanyltryptophan                  | -7.78E-03 | 5.94E-03 | 1.91E-01 | -3.27E-02 | 1.36E-02 | 1.67E-02 | -3.11E-02 | 3.20E-02 | 3.33E-01 |
| tyrosyllysine                           | 6.12E-03  | 3.94E-03 | 1.21E-01 | 1.97E-02  | 9.03E-03 | 3.02E-02 | 2.80E-02  | 2.13E-02 | 1.88E-01 |
| tryptophylasparagine                    | 6.35E-03  | 3.73E-03 | 8.93E-02 | 1.29E-02  | 8.59E-03 | 1.35E-01 | 1.50E-02  | 2.02E-02 | 4.58E-01 |
| aspartylaspartate                       | 1.88E-03  | 5.80E-03 | 7.46E-01 | 1.63E-03  | 1.34E-02 | 9.03E-01 | 4.63E-02  | 3.11E-02 | 1.38E-01 |
| valylalanine                            | 3.76E-03  | 5.38E-03 | 4.86E-01 | 1.33E-02  | 1.24E-02 | 2.85E-01 | 4.06E-02  | 2.89E-02 | 1.61E-01 |
| valylglycine                            | -1.40E-03 | 6.04E-03 | 8.17E-01 | 1.46E-02  | 1.39E-02 | 2.95E-01 | 1.56E-02  | 3.26E-02 | 6.32E-01 |
| valylphenylalanine                      | 9.73E-03  | 5.53E-03 | 7.96E-02 | 3.04E-02  | 1.27E-02 | 1.69E-02 | 5.67E-02  | 2.98E-02 | 5.81E-02 |
| methionylalanine                        | 4.69E-03  | 5.08E-03 | 3.57E-01 | 1.41E-02  | 1.17E-02 | 2.29E-01 | 2.46E-02  | 2.74E-02 | 3.70E-01 |
| N-palmitoylglycine                      | -6.73E-03 | 6.01E-03 | 2.63E-01 | -2.52E-02 | 1.38E-02 | 6.80E-02 | -5.33E-02 | 3.23E-02 | 1.00E-01 |
| mannonate*                              | -1.09E-02 | 5.98E-03 | 7.04E-02 | -5.76E-03 | 1.38E-02 | 6.77E-01 | -7.53E-02 | 3.21E-02 | 1.96E-02 |
| norfluxetine                            | 1.95E-04  | 2.51E-03 | 9.38E-01 | -4.95E-03 | 5.78E-03 | 3.93E-01 | 7.88E-03  | 1.35E-02 | 5.61E-01 |
| 2-stearoyl-GPE (18:0)*                  | -5.52E-03 | 6.14E-03 | 3.70E-01 | -2.09E-02 | 1.41E-02 | 1.40E-01 | -2.63E-02 | 3.31E-02 | 4.28E-01 |
| (R)-3-hydroxybutyrylcarnitine           | -1.09E-02 | 5.32E-03 | 4.03E-02 | -2.83E-02 | 1.22E-02 | 2.12E-02 | -4.09E-02 | 2.88E-02 | 1.56E-01 |
| N-octanoylglycine                       | -7.10E-03 | 5.78E-03 | 2.21E-01 | -7.36E-03 | 1.33E-02 | 5.82E-01 | -5.28E-02 | 3.11E-02 | 9.04E-02 |
| doxylamine                              | -8.78E-04 | 1.38E-03 | 5.24E-01 | -3.68E-03 | 3.17E-03 | 2.46E-01 | -3.95E-03 | 7.43E-03 | 5.95E-01 |
| triamterene                             | 4.03E-04  | 1.06E-03 | 7.04E-01 | -1.12E-04 | 2.43E-03 | 9.63E-01 | -5.61E-04 | 5.70E-03 | 9.22E-01 |
| diltiazem                               | -3.25E-04 | 1.88E-03 | 8.63E-01 | 3.46E-03  | 4.32E-03 | 4.24E-01 | 3.98E-03  | 1.01E-02 | 6.94E-01 |
| feloxenadine                            | -8.50E-04 | 2.36E-03 | 7.19E-01 | -6.41E-03 | 5.42E-03 | 2.38E-01 | -2.45E-02 | 1.26E-02 | 5.37E-02 |
| verapamil                               | 1.53E-03  | 9.45E-04 | 1.07E-01 | 1.99E-03  | 2.18E-03 | 3.63E-01 | 4.87E-03  | 5.11E-03 | 3.41E-01 |
| N-acetylcarnosine                       | -3.80E-03 | 4.77E-03 | 4.26E-01 | 1.43E-02  | 1.10E-02 | 1.95E-01 | -3.23E-02 | 2.57E-02 | 2.10E-01 |
| margaroylcarnitine (C17)*               | -2.17E-02 | 5.65E-03 | 1.46E-04 | -4.01E-02 | 1.31E-02 | 2.44E-03 | -1.06E-01 | 3.06E-02 | 5.76E-04 |
| N-methyltaurine                         | 1.15E-02  | 5.48E-03 | 3.71E-02 | -2.06E-03 | 1.27E-02 | 8.72E-01 | 9.52E-02  | 2.92E-02 | 1.25E-03 |
| histidine betaine (hercynine)*          | 1.48E-02  | 5.90E-03 | 1.25E-02 | 1.15E-03  | 1.37E-02 | 9.33E-01 | 1.17E-01  | 3.14E-02 | 2.28E-04 |
| glycohyocholate                         | 7.72E-03  | 5.82E-03 | 1.85E-01 | 1.33E-02  | 1.34E-02 | 3.23E-01 | 2.08E-02  | 3.14E-02 | 5.08E-01 |
| 2-hydroxydecanoate                      | 1.71E-02  | 5.97E-03 | 4.49E-03 | 3.22E-02  | 1.38E-02 | 2.06E-02 | 4.26E-02  | 3.25E-02 | 1.91E-01 |
| 3-methyl catechol sulfate (2)           | 3.78E-03  | 4.65E-03 | 4.17E-01 | -6.87E-04 | 1.07E-02 | 9.49E-01 | 2.34E-03  | 2.51E-02 | 9.26E-01 |
| 4-methylcatechol sulfate                | 1.89E-02  | 5.91E-03 | 1.54E-03 | 4.29E-02  | 1.36E-02 | 1.80E-03 | 5.24E-02  | 3.23E-02 | 1.06E-01 |
| 3-methyl catechol sulfate (1)           | -4.06E-03 | 5.80E-03 | 4.85E-01 | -1.94E-02 | 1.33E-02 | 1.46E-01 | -3.30E-02 | 3.12E-02 | 2.91E-01 |
| 2-hydroxyibuprofen                      | -7.24E-04 | 3.91E-03 | 8.53E-01 | -2.24E-02 | 8.90E-03 | 1.25E-02 | -1.70E-02 | 2.11E-02 | 4.20E-01 |
| carboxyibuprofen                        | -7.77E-03 | 4.40E-03 | 7.84E-02 | -2.48E-02 | 1.01E-02 | 1.43E-02 | -4.14E-02 | 2.37E-02 | 8.18E-02 |
| O-desmethylenlafaxine                   | 8.27E-04  | 1.68E-03 | 6.24E-01 | -1.84E-03 | 3.88E-03 | 6.35E-01 | 1.75E-02  | 9.02E-03 | 5.31E-02 |
| zolpidem                                | -1.35E-03 | 1.39E-03 | 3.33E-01 | -6.92E-03 | 3.18E-03 | 3.06E-02 | -3.23E-03 | 7.51E-03 | 6.67E-01 |
| warfarin                                | 9.70E-04  | 2.02E-03 | 6.32E-01 | 5.75E-03  | 4.65E-03 | 2.17E-01 | -2.24E-02 | 1.08E-02 | 3.93E-02 |
| 3b-hydroxy-5-cholenoic acid             | 6.73E-03  | 5.83E-03 | 2.49E-01 | 1.95E-02  | 1.34E-02 | 1.48E-01 | 7.76E-03  | 3.15E-02 | 8.06E-01 |
| guaiaicol sulfate                       | 2.77E-02  | 5.59E-03 | 1.27E-06 | 5.40E-02  | 1.30E-02 | 4.53E-05 | 1.00E-01  | 3.09E-02 | 1.33E-03 |
| 2-aminooctanoate                        | 1.07E-02  | 5.82E-03 | 6.80E-02 | 2.43E-02  | 1.34E-02 | 7.05E-02 | 4.59E-02  | 3.14E-02 | 1.45E-01 |
| furosemide                              | 1.94E-03  | 1.65E-03 | 2.41E-01 | 8.13E-03  | 3.78E-03 | 3.22E-02 | 9.51E-03  | 8.89E-03 | 2.86E-01 |
| gamma-CEHC glucuronide*                 | -1.14E-02 | 6.16E-03 | 6.57E-02 | 1.25E-02  | 1.43E-02 | 3.80E-01 | -5.76E-02 | 3.32E-02 | 8.43E-02 |
| dimethyl sulfone                        | 5.84E-04  | 6.15E-03 | 9.24E-01 | 1.69E-02  | 1.41E-02 | 2.33E-01 | -2.65E-02 | 3.31E-02 | 4.23E-01 |
| N-acetyl-1-methylhistidine*             | -1.70E-02 | 5.13E-03 | 1.07E-03 | -3.79E-02 | 1.18E-02 | 1.51E-03 | -5.75E-02 | 2.80E-02 | 4.07E-02 |
| indolin-2-one                           | -1.23E-03 | 5.41E-03 | 8.20E-01 | 1.43E-02  | 1.24E-02 | 2.52E-01 | -1.30E-02 | 2.92E-02 | 6.55E-01 |
| 2,8-quinolinediol sulfate               | -9.09E-04 | 4.28E-03 | 8.32E-01 | 8.12E-03  | 9.85E-03 | 4.10E-01 | -6.38E-03 | 2.31E-02 | 7.82E-01 |
| 2-aminophenol sulfate                   | 1.10E-02  | 5.86E-03 | 6.13E-02 | 5.11E-02  | 1.32E-02 | 1.37E-04 | 4.20E-02  | 3.17E-02 | 1.85E-01 |
| 3-acetylphenol sulfate                  | 4.89E-03  | 5.54E-03 | 3.78E-01 | 1.42E-02  | 1.27E-02 | 2.66E-01 | 4.61E-02  | 2.98E-02 | 1.22E-01 |
| sphingomyelin (d18:1/14:0, d16:1/16:0)* | -6.85E-03 | 5.49E-03 | 2.13E-01 | -1.24E-02 | 1.27E-02 | 3.27E-01 | -6.61E-02 | 2.94E-02 | 2.53E-02 |
| sphingomyelin (d18:2/16:0, d18:1/16:1)* | -1.22E-02 | 5.59E-03 | 2.99E-02 | -2.55E-02 | 1.29E-02 | 4.93E-02 | -1.60E-02 | 3.04E-02 | 6.00E-01 |
| 3-hydroxyadipate                        | -6.01E-03 | 5.68E-03 | 2.90E-01 | 7.47E-03  | 1.31E-02 | 5.69E-01 | -1.76E-02 | 3.06E-02 | 5.66E-01 |
| 3-hydroxycytinine glucuronide           | -2.47E-03 | 2.90E-03 | 3.95E-01 | -1.08E-02 | 6.65E-03 | 1.06E-01 | -3.09E-03 | 1.56E-02 | 8.44E-01 |
| 6-oxopiperidine-2-carboxylate           | 3.72E-03  | 6.03E-03 | 5.37E-01 | 2.37E-02  | 1.38E-02 | 8.66E-02 | 3.81E-02  | 3.24E-02 | 2.40E-01 |
| S-allylcysteine                         | 5.84E-04  | 5.60E-03 | 9.17E-01 | -1.46E-02 | 1.29E-02 | 2.56E-01 | 4.54E-02  | 3.01E-02 | 1.33E-01 |
| allopurinol                             | -1.89E-03 | 1.41E-03 | 1.81E-01 | 4.28E-04  | 3.26E-03 | 8.95E-01 | -1.37E-02 | 7.58E-03 | 7.15E-02 |
| N-delta-acetylornithine                 | 2.89E-02  | 5.12E-03 | 4.04E-08 | 4.56E-02  | 1.21E-02 | 2.09E-04 | 1.35E-01  | 2.80E-02 | 2.51E-06 |
| acisoga                                 | 8.94E-03  | 5.94E-03 | 1.33E-01 | 1.45E-02  | 1.37E-02 | 2.89E-01 | 8.51E-02  | 3.17E-02 | 7.74E-03 |
| 2-aminoheptanoate                       | 4.46E-03  | 5.97E-03 | 4.56E-01 | 1.27E-02  | 1.37E-02 | 3.58E-01 | 2.65E-02  | 3.22E-02 | 4.11E-01 |
| 1-eicosapentaenoyl-GPE (20:5)*          | 8.84E-03  | 5.81E-03 | 1.29E-01 | -1.38E-03 | 1.34E-02 | 9.18E-01 | 7.81E-02  | 3.11E-02 | 1.25E-02 |
| N-formylanthranilic acid                | -3.11E-03 | 6.06E-03 | 6.08E-01 | -5.12E-03 | 1.40E-02 | 7.14E-01 | -1.54E-02 | 3.27E-02 | 6.38E-01 |
| N2,N5-diacetylornithine                 | 1.87E-02  | 5.71E-03 | 1.19E-03 | 1.05E-03  | 1.34E-02 | 9.38E-01 | 1.08E-01  | 3.07E-02 | 5.31E-04 |
| 1H-indole-7-acetic acid                 | 7.74E-04  | 5.96E-03 | 8.97E-01 | 8.81E-03  | 1.37E-02 | 5.21E-01 | -8.05E-02 | 3.18E-02 | 1.18E-02 |

Supplementary Table 2: Parameter estimates for metabolome-wide association studies for diet-metabolite associations for each of: The Healthy Eating Index-2015 (HEI-15), DASH and AMED diet

|                                                     |           |          |          |           |          |          |           |          |          |
|-----------------------------------------------------|-----------|----------|----------|-----------|----------|----------|-----------|----------|----------|
| 3-methoxytyramine sulfate                           | 1.20E-02  | 5.51E-03 | 3.06E-02 | 1.18E-02  | 1.28E-02 | 3.56E-01 | 2.62E-02  | 2.99E-02 | 3.82E-01 |
| methionine sulfone                                  | 3.40E-03  | 5.94E-03 | 5.67E-01 | 1.27E-02  | 1.37E-02 | 3.54E-01 | -9.69E-03 | 3.20E-02 | 7.62E-01 |
| cyclo(ala-pro)                                      | 6.89E-04  | 5.55E-03 | 9.01E-01 | -1.20E-02 | 1.28E-02 | 3.47E-01 | 6.86E-03  | 2.99E-02 | 8.19E-01 |
| norbenzoyllecgonine*                                | -1.38E-03 | 1.59E-03 | 3.86E-01 | -3.20E-03 | 3.65E-03 | 3.82E-01 | 7.46E-04  | 8.56E-03 | 9.31E-01 |
| 1-linolenoyl-GPC (18:3)*                            | 6.60E-03  | 5.92E-03 | 2.66E-01 | 7.30E-03  | 1.37E-02 | 5.93E-01 | 4.48E-02  | 3.19E-02 | 1.61E-01 |
| 1-eicosapentaenoyl-GPC (20:5)*                      | 1.18E-02  | 5.94E-03 | 4.84E-02 | 1.39E-03  | 1.38E-02 | 9.20E-01 | 8.46E-02  | 3.18E-02 | 8.28E-03 |
| 1-eicosenoyl-GPC (20:1)*                            | 3.07E-02  | 5.70E-03 | 1.57E-07 | 4.77E-02  | 1.35E-02 | 4.84E-04 | 1.51E-01  | 3.10E-02 | 1.87E-06 |
| 1-nonadecanoyl-GPC (19:0)                           | 1.59E-02  | 5.35E-03 | 3.19E-03 | 3.81E-02  | 1.23E-02 | 2.15E-03 | 7.62E-02  | 2.89E-02 | 8.91E-03 |
| N-acetyllaiiin                                      | 1.36E-03  | 5.77E-03 | 8.14E-01 | -1.38E-02 | 1.33E-02 | 2.99E-01 | 4.54E-02  | 3.10E-02 | 1.44E-01 |
| 1-dihomo-linolenoyl-GPE (20:3n3 or 6)*              | 4.78E-03  | 5.97E-03 | 4.24E-01 | 6.54E-03  | 1.38E-02 | 6.35E-01 | -1.17E-02 | 3.22E-02 | 7.16E-01 |
| 1-(1-enyl-oleoyl)-GPE (P-18:1)*                     | 6.12E-04  | 6.18E-03 | 9.21E-01 | -1.22E-02 | 1.42E-02 | 3.91E-01 | 3.16E-02  | 3.32E-02 | 3.42E-01 |
| fructosyllysine                                     | -8.42E-03 | 5.98E-03 | 1.60E-01 | -1.89E-02 | 1.38E-02 | 1.70E-01 | -7.76E-02 | 3.20E-02 | 1.60E-02 |
| 1-eicosenoyl-GPE (20:1)*                            | 1.60E-02  | 5.71E-03 | 5.57E-03 | 2.72E-02  | 1.32E-02 | 4.07E-02 | 6.48E-02  | 3.10E-02 | 3.71E-02 |
| N-methylpipecolate                                  | 5.88E-03  | 5.21E-03 | 2.60E-01 | 4.40E-03  | 1.20E-02 | 7.15E-01 | 2.63E-02  | 2.81E-02 | 3.50E-01 |
| O-sulfo-L-tyrosine                                  | 1.38E-04  | 5.92E-03 | 9.81E-01 | 1.15E-03  | 1.36E-02 | 9.33E-01 | 6.08E-03  | 3.19E-02 | 8.49E-01 |
| ferulic acid 4-sulfate                              | 1.22E-02  | 4.72E-03 | 1.00E-02 | 2.91E-02  | 1.08E-02 | 7.69E-03 | 4.65E-02  | 2.56E-02 | 7.00E-02 |
| 3-(3-hydroxyphenyl)propionate sulfate               | 1.61E-02  | 5.82E-03 | 5.95E-03 | 3.74E-02  | 1.34E-02 | 5.65E-03 | 6.52E-02  | 3.16E-02 | 3.98E-02 |
| 11-ketoetiocolanolone glucuronide                   | 6.58E-03  | 5.74E-03 | 2.52E-01 | 6.22E-03  | 1.32E-02 | 6.39E-01 | -4.11E-02 | 3.09E-02 | 1.84E-01 |
| etiocolanolone glucuronide                          | 2.28E-04  | 5.56E-03 | 9.67E-01 | -4.71E-03 | 1.28E-02 | 7.13E-01 | -9.72E-03 | 2.99E-02 | 7.46E-01 |
| 17alpha-hydroxypregnanolone glucuronide             | -5.91E-04 | 5.11E-03 | 9.08E-01 | -1.15E-02 | 1.18E-02 | 3.29E-01 | -3.68E-02 | 2.75E-02 | 1.81E-01 |
| N-acetyltaurine                                     | -2.84E-03 | 5.47E-03 | 6.03E-01 | 7.73E-03  | 1.26E-02 | 5.40E-01 | 2.76E-03  | 2.95E-02 | 9.25E-01 |
| 1-docosapentaenoyl-GPC (22:5n6)*                    | -1.13E-02 | 5.70E-03 | 4.93E-02 | -2.86E-02 | 1.31E-02 | 2.96E-02 | -9.49E-02 | 3.04E-02 | 2.01E-03 |
| 1-linolenoyl-GPE (18:3)*                            | 4.81E-04  | 5.97E-03 | 9.36E-01 | 3.50E-03  | 1.37E-02 | 7.99E-01 | 6.08E-03  | 3.22E-02 | 8.50E-01 |
| 1-oleoyl-GPG (18:1)*                                | 7.21E-03  | 5.13E-03 | 1.61E-01 | 1.78E-02  | 1.18E-02 | 1.33E-01 | -2.62E-02 | 2.77E-02 | 3.44E-01 |
| 1-palmitoyl-GPG (16:0)*                             | -5.01E-03 | 5.88E-03 | 3.95E-01 | -8.96E-03 | 1.35E-02 | 5.08E-01 | -3.11E-02 | 3.17E-02 | 3.27E-01 |
| N-linoleoyltaurine*                                 | 6.30E-03  | 5.55E-03 | 2.57E-01 | 1.68E-02  | 1.28E-02 | 1.90E-01 | 2.31E-02  | 3.00E-02 | 4.42E-01 |
| N-acetyl-S-allyl-L-cysteine                         | -8.13E-04 | 5.03E-03 | 8.72E-01 | -1.29E-02 | 1.16E-02 | 2.64E-01 | 2.07E-02  | 2.71E-02 | 4.46E-01 |
| 9-hydroxystearate                                   | -1.92E-02 | 5.25E-03 | 3.03E-04 | -3.51E-02 | 1.22E-02 | 4.22E-03 | -8.42E-02 | 2.85E-02 | 3.40E-03 |
| 3-methylglutaryl carnitine (2)                      | -1.11E-03 | 5.46E-03 | 8.40E-01 | 2.03E-02  | 1.25E-02 | 1.06E-01 | -2.81E-02 | 2.94E-02 | 3.39E-01 |
| methyl glucopyranoside (alpha + beta)               | 2.75E-02  | 5.65E-03 | 1.86E-06 | 4.94E-02  | 1.32E-02 | 2.28E-04 | 1.27E-01  | 3.08E-02 | 5.15E-05 |
| 2-keto-3-deoxy-glucuronate                          | -5.71E-03 | 5.62E-03 | 3.10E-01 | 1.88E-02  | 1.29E-02 | 1.46E-01 | -5.43E-02 | 3.02E-02 | 7.29E-02 |
| alpha-CEHC sulfate                                  | 9.12E-03  | 5.26E-03 | 8.42E-02 | 1.42E-02  | 1.21E-02 | 2.43E-01 | -1.27E-02 | 2.85E-02 | 6.55E-01 |
| alpha-CMBHC glucuronide                             | 3.78E-04  | 5.55E-03 | 9.46E-01 | 5.60E-03  | 1.28E-02 | 6.61E-01 | -1.05E-02 | 2.99E-02 | 7.24E-01 |
| sphingomyelin (d18:2/14:0, d18:1/14:1)*             | -2.53E-03 | 4.94E-03 | 6.09E-01 | -7.28E-03 | 1.14E-02 | 5.23E-01 | -1.14E-03 | 2.66E-02 | 9.66E-01 |
| sphingomyelin (d18:1/24:1, d18:2/24:0)*             | -4.88E-03 | 5.81E-03 | 4.01E-01 | -4.35E-02 | 1.31E-02 | 1.04E-03 | 1.66E-02  | 3.13E-02 | 5.96E-01 |
| octadecenediyl carnitine (C18:1-DC)*                | -1.81E-04 | 5.95E-03 | 9.76E-01 | 1.62E-02  | 1.37E-02 | 2.37E-01 | -3.30E-03 | 3.21E-02 | 9.18E-01 |
| octadecanediyl carnitine (C18-DC)*                  | -9.66E-03 | 5.89E-03 | 1.02E-01 | 6.07E-03  | 1.36E-02 | 6.56E-01 | -6.08E-02 | 3.17E-02 | 5.62E-02 |
| N,O-didesmethylvenlafaxine glucuronide              | 9.32E-04  | 1.66E-03 | 5.75E-01 | 1.57E-03  | 3.82E-03 | 6.81E-01 | 1.41E-02  | 8.91E-03 | 1.14E-01 |
| 5alpha-androstan-3alpha,17beta-diol monosulfate (2) | -1.02E-02 | 4.24E-03 | 1.66E-02 | -1.57E-02 | 9.82E-03 | 1.10E-01 | -5.03E-02 | 2.29E-02 | 2.90E-02 |
| myristoleyl carnitine (C14:1)*                      | -9.27E-03 | 5.88E-03 | 1.16E-01 | -3.49E-02 | 1.34E-02 | 9.87E-03 | -2.22E-02 | 3.18E-02 | 4.86E-01 |
| N-formylphenylalanine                               | 7.54E-03  | 6.02E-03 | 2.11E-01 | 8.11E-03  | 1.39E-02 | 5.60E-01 | 2.41E-02  | 3.25E-02 | 4.59E-01 |
| cyclo(pro-val)                                      | -7.60E-03 | 5.90E-03 | 1.99E-01 | -6.83E-03 | 1.36E-02 | 6.16E-01 | 1.39E-03  | 3.19E-02 | 9.65E-01 |
| 4-hydroxychlorothalonil                             | -1.28E-02 | 5.58E-03 | 2.28E-02 | -3.62E-02 | 1.28E-02 | 4.98E-03 | -5.46E-02 | 3.02E-02 | 7.15E-02 |
| isoeugenol sulfate                                  | -3.80E-04 | 4.89E-03 | 9.38E-01 | -2.11E-03 | 1.13E-02 | 8.51E-01 | 2.98E-02  | 2.63E-02 | 2.58E-01 |
| tyramine O-sulfate                                  | -5.27E-03 | 5.71E-03 | 3.57E-01 | -1.14E-02 | 1.31E-02 | 3.86E-01 | 5.53E-03  | 3.08E-02 | 8.58E-01 |
| 3-hydroxypyridine sulfate                           | 1.07E-02  | 5.61E-03 | 5.83E-02 | -2.81E-03 | 1.30E-02 | 8.29E-01 | 3.16E-02  | 3.04E-02 | 3.00E-01 |
| 4-methylguaiaicol sulfate                           | 1.89E-02  | 6.04E-03 | 1.92E-03 | 3.86E-02  | 1.40E-02 | 6.02E-03 | 5.29E-02  | 3.30E-02 | 1.10E-01 |
| maltol sulfate                                      | 5.02E-03  | 4.41E-03 | 2.57E-01 | 8.33E-03  | 1.02E-02 | 4.13E-01 | 2.08E-02  | 2.38E-02 | 3.84E-01 |
| phenylacetyl carnitine                              | 6.16E-03  | 5.62E-03 | 2.74E-01 | 3.18E-02  | 1.28E-02 | 1.35E-02 | 4.99E-02  | 3.02E-02 | 9.91E-02 |
| arabonate/xylonate                                  | 1.13E-02  | 5.27E-03 | 3.35E-02 | 2.35E-02  | 1.21E-02 | 5.39E-02 | 6.00E-03  | 2.86E-02 | 8.34E-01 |
| methyl-4-hydroxybenzoate sulfate                    | -2.44E-03 | 5.51E-03 | 6.58E-01 | 1.46E-03  | 1.27E-02 | 9.08E-01 | -1.09E-02 | 2.97E-02 | 7.14E-01 |
| 1-dihomo-linolenylglycerol (20:3)                   | -1.89E-03 | 5.68E-03 | 7.40E-01 | 8.21E-04  | 1.31E-02 | 9.50E-01 | -3.71E-02 | 3.05E-02 | 2.26E-01 |
| vanillic alcohol sulfate                            | 3.01E-03  | 4.84E-03 | 5.34E-01 | 2.42E-02  | 1.11E-02 | 2.96E-02 | 2.11E-02  | 2.61E-02 | 4.19E-01 |
| 4-vinylguaiaicol sulfate                            | 9.02E-03  | 5.07E-03 | 7.65E-02 | 1.76E-02  | 1.17E-02 | 1.34E-01 | 2.60E-02  | 2.75E-02 | 3.44E-01 |
| vanillactate                                        | -5.32E-03 | 5.54E-03 | 3.38E-01 | 9.14E-03  | 1.28E-02 | 4.74E-01 | -3.46E-02 | 2.98E-02 | 2.47E-01 |
| eugenol sulfate                                     | 5.86E-03  | 5.76E-03 | 3.10E-01 | 6.78E-03  | 1.33E-02 | 6.10E-01 | 3.76E-02  | 3.10E-02 | 2.27E-01 |
| pregnanolone/allopregnanolone sulfate               | 4.22E-04  | 4.82E-03 | 9.30E-01 | -7.97E-03 | 1.11E-02 | 4.73E-01 | -2.87E-02 | 2.59E-02 | 2.70E-01 |
| 2-methoxyresorcinol sulfate                         | 2.01E-03  | 5.11E-03 | 6.94E-01 | -2.45E-03 | 1.18E-02 | 8.35E-01 | 4.26E-02  | 2.74E-02 | 1.21E-01 |
| 2-acetamidophenol sulfate                           | 1.69E-02  | 5.59E-03 | 2.83E-03 | 5.34E-02  | 1.27E-02 | 3.51E-05 | 6.06E-02  | 3.04E-02 | 4.73E-02 |
| p-cresol glucuronide*                               | 2.61E-03  | 6.04E-03 | 6.66E-01 | 2.50E-02  | 1.38E-02 | 7.21E-02 | -1.74E-02 | 3.26E-02 | 5.93E-01 |
| acesulfame                                          | -4.01E-03 | 5.17E-03 | 4.39E-01 | -3.26E-04 | 1.19E-02 | 9.78E-01 | -1.29E-02 | 2.79E-02 | 6.44E-01 |
| valsartan                                           | 3.21E-04  | 1.38E-03 | 8.16E-01 | -7.88E-04 | 3.17E-03 | 8.04E-01 | -2.29E-03 | 7.43E-03 | 7.58E-01 |
| 6-hydroxyindole sulfate                             | -5.99E-03 | 6.08E-03 | 3.25E-01 | 3.81E-03  | 1.40E-02 | 7.86E-01 | -4.48E-02 | 3.27E-02 | 1.72E-01 |
| 4-methoxyphenol sulfate                             | 1.85E-02  | 5.66E-03 | 1.24E-03 | 5.96E-02  | 1.28E-02 | 4.83E-06 | 9.73E-02  | 3.05E-02 | 1.59E-03 |
| 2,4-dichlorophenol sulfate                          | 9.35E-04  | 2.78E-03 | 7.37E-01 | 6.58E-04  | 6.40E-03 | 9.18E-01 | -4.95E-04 | 1.50E-02 | 9.74E-01 |
| propyl 4-hydroxybenzoate sulfate                    | -8.88E-03 | 4.77E-03 | 6.38E-02 | -6.47E-03 | 1.10E-02 | 5.59E-01 | -4.20E-02 | 2.58E-02 | 1.04E-01 |
| ethylparaben sulfate                                | -3.29E-03 | 5.48E-03 | 5.49E-01 | -3.20E-02 | 1.25E-02 | 1.09E-02 | -2.67E-02 | 2.95E-02 | 3.67E-01 |
| umbelliferone sulfate                               | 3.72E-03  | 5.53E-03 | 5.02E-01 | 1.02E-02  | 1.27E-02 | 4.23E-01 | 3.72E-02  | 2.97E-02 | 2.11E-01 |
| sphingomyelin (d18:1/20:0, d16:1/22:0)*             | -6.41E-03 | 5.79E-03 | 2.70E-01 | -1.66E-02 | 1.33E-02 | 2.14E-01 | -5.03E-02 | 3.11E-02 | 1.07E-01 |
| sphingomyelin (d18:1/20:1, d18:2/20:0)*             | -9.62E-03 | 5.42E-03 | 7.72E-02 | -1.30E-02 | 1.25E-02 | 2.99E-01 | -1.64E-02 | 2.94E-02 | 5.76E-01 |
| sphingomyelin (d18:1/20:2, d18:2/20:1, d16:1/22:2)* | -1.84E-02 | 5.35E-03 | 6.62E-04 | -4.23E-02 | 1.23E-02 | 6.82E-04 | -1.04E-01 | 2.88E-02 | 3.65E-04 |
| behenoyl sphingomyelin (d18:1/22:0)*                | -4.00E-03 | 6.12E-03 | 5.15E-01 | -2.10E-02 | 1.40E-02 | 1.36E-01 | -1.57E-03 | 3.30E-02 | 9.62E-01 |
| sphingomyelin (d18:1/22:1, d18:2/22:0, d16:1/24:1)* | -2.58E-03 | 5.44E-03 | 6.36E-01 | -7.53E-03 | 1.25E-02 | 5.48E-01 | -2.34E-03 | 2.93E-02 | 9.37E-01 |
| sphingomyelin (d18:1/22:2, d18:2/22:1, d16:1/24:2)* | -1.70E-02 | 5.58E-03 | 2.58E-03 | -4.56E-02 | 1.28E-02 | 4.22E-04 | -9.33E-02 | 3.01E-02 | 2.11E-03 |
| lignoceroyl sphingomyelin (d18:1/24:0)              | 1.17E-02  | 5.97E-03 | 5.08E-02 | -1.18E-03 | 1.38E-02 | 9.32E-01 | 7.19E-02  | 3.21E-02 | 2.60E-02 |
| sphingomyelin (d17:1/16:0, d18:1/15:0, d16:1/17:0)* | -1.73E-02 | 5.48E-03 | 1.78E-03 | -2.49E-02 | 1.27E-02 | 5.16E-02 | -1.07E-01 | 2.93E-02 | 3.20E-04 |
| dopamine 3-O-sulfate                                | 2.23E-02  | 5.97E-03 | 2.24E-04 | 3.90E-02  | 1.39E-02 | 5.36E-03 | 6.43E-02  | 3.28E-02 | 5.08E-02 |
| 3-hydroxyhexanoate                                  | -4.00E-03 | 5.58E-03 | 4.75E-01 | -2.61E-03 | 1.29E-02 | 8.40E-01 | -1.71E-02 | 3.01E-02 | 5.70E-01 |
| N-carbamoylalanine                                  | 1.75E-02  | 5.48E-03 | 1.54E-03 | 4.79E-02  | 1.25E-02 | 1.61E-04 | 6.62E-02  | 2.98E-02 | 2.72E-02 |
| 3beta-hydroxy-5-cholestenoate                       | -7.36E-04 | 5.83E-03 | 9.00E-01 | -1.31E-02 | 1.34E-02 | 3.31E-01 | -1.01E-02 | 3.14E-02 | 7.48E-01 |
| 1,2,3-benzenetriol sulfate (2)                      | -2.40E-04 | 4.62E-03 | 9.59E-01 | -6.66E-03 | 1.06E-02 | 5.31E-01 | 5.57E-03  | 2.49E-02 | 8.23E-01 |
| 3-methoxycatechol sulfate (1)                       | 3.96E-03  | 6.08E-03 | 5.15E-01 | 1.05E-02  | 1.40E-02 | 4.55E-01 | 7.57E-02  | 3.25E-02 | 2.04E-02 |
| 3-methoxycatechol sulfate (2)                       | 8.63E-03  | 5.66E-03 | 1.28E-01 | 2.95E-02  | 1.30E-02 | 2.37E-02 | 2.97E-02  | 3.06E-02 | 3.33E-01 |
| N-acetylkynurenine (2)                              | -4.27E-03 | 5.48E-03 | 4.37E-01 | -9.67E-03 | 1.26E-02 | 4.44E-01 | -2.62E-02 | 2.95E-02 | 3.75E-01 |

Supplementary Table 2: Parameter estimates for metabolome-wide association studies for diet-metabolite associations for each of: The Healthy Eating Index-2015 (HEI-15), DASH and AMED diet

|                                                             |           |          |          |           |          |          |           |          |          |
|-------------------------------------------------------------|-----------|----------|----------|-----------|----------|----------|-----------|----------|----------|
| C-glycosyltryptophan                                        | -1.12E-02 | 5.78E-03 | 5.44E-02 | -3.70E-03 | 1.34E-02 | 7.83E-01 | -9.30E-02 | 3.09E-02 | 2.82E-03 |
| tramadol                                                    | -4.00E-04 | 1.05E-03 | 7.04E-01 | -2.91E-03 | 2.41E-03 | 2.28E-01 | -2.38E-03 | 5.66E-03 | 6.74E-01 |
| O-desmethyltramadol                                         | -4.00E-04 | 1.05E-03 | 7.04E-01 | -2.91E-03 | 2.41E-03 | 2.28E-01 | -2.38E-03 | 5.66E-03 | 6.74E-01 |
| O-desmethyltramadol glucuronide                             | -4.00E-04 | 1.05E-03 | 7.04E-01 | -2.91E-03 | 2.41E-03 | 2.28E-01 | -2.38E-03 | 5.66E-03 | 6.74E-01 |
| arabitol/xylitol                                            | 4.38E-03  | 5.53E-03 | 4.30E-01 | 9.49E-03  | 1.27E-02 | 4.57E-01 | 5.30E-03  | 2.99E-02 | 8.59E-01 |
| N-acetylglucosamine/N-acetylgalactosamine                   | -1.02E-02 | 5.89E-03 | 8.40E-02 | -1.34E-02 | 1.36E-02 | 3.25E-01 | -6.96E-02 | 3.16E-02 | 2.87E-02 |
| citrate/acetate/glutamate                                   | 6.12E-03  | 5.69E-03 | 2.83E-01 | -1.02E-02 | 1.31E-02 | 4.36E-01 | 6.30E-03  | 3.07E-02 | 8.38E-01 |
| adipoylcarnitine (C6-DC)                                    | -2.08E-02 | 5.76E-03 | 3.61E-04 | -9.47E-03 | 1.35E-02 | 4.85E-01 | -8.54E-02 | 3.13E-02 | 6.84E-03 |
| nonanoylcarnitine (C9)                                      | -1.77E-02 | 5.94E-03 | 3.17E-03 | -3.94E-02 | 1.37E-02 | 4.28E-03 | -5.54E-02 | 3.23E-02 | 8.77E-02 |
| glycogenodeoxycholate 3-sulfate                             | -3.35E-03 | 5.47E-03 | 5.40E-01 | -1.01E-02 | 1.26E-02 | 4.23E-01 | -2.93E-02 | 2.94E-02 | 3.20E-01 |
| glycodeoxycholate 3-sulfate                                 | 5.52E-03  | 5.77E-03 | 3.39E-01 | 3.45E-03  | 1.33E-02 | 7.96E-01 | -2.48E-02 | 3.11E-02 | 4.26E-01 |
| taurodeoxycholic acid 3-sulfate                             | 8.34E-04  | 5.81E-03 | 8.86E-01 | -1.10E-02 | 1.34E-02 | 4.11E-01 | -4.99E-02 | 3.12E-02 | 1.11E-01 |
| trans-3,4-methyleneheptanoate                               | -8.61E-03 | 5.58E-03 | 1.24E-01 | -1.08E-02 | 1.29E-02 | 4.02E-01 | -2.95E-02 | 3.01E-02 | 3.29E-01 |
| phenol glucuronide                                          | -7.01E-03 | 5.68E-03 | 2.18E-01 | -6.03E-03 | 1.31E-02 | 6.46E-01 | -8.39E-03 | 3.07E-02 | 7.85E-01 |
| linoleoyl ethanolamide                                      | -5.86E-03 | 5.71E-03 | 3.05E-01 | -7.41E-03 | 1.32E-02 | 5.74E-01 | -1.34E-02 | 3.08E-02 | 6.65E-01 |
| 1,2-dilinoeloyl-GPC (18:2/18:2)                             | 1.16E-02  | 5.82E-03 | 4.74E-02 | 2.96E-02  | 1.34E-02 | 2.79E-02 | 6.79E-02  | 3.13E-02 | 3.09E-02 |
| 1-stearoyl-2-oleoyl-GPC (18:0/18:1)                         | 3.88E-03  | 6.12E-03 | 5.27E-01 | -6.98E-03 | 1.41E-02 | 6.21E-01 | 3.88E-02  | 3.29E-02 | 2.40E-01 |
| 1-palmitoyl-2-arachidonoyl-GPC (16:0/20:4n6)                | -1.54E-02 | 5.94E-03 | 9.86E-03 | -6.85E-02 | 1.32E-02 | 4.07E-07 | -6.01E-02 | 3.22E-02 | 6.30E-02 |
| 1-palmitoyl-2-docosahexaenoyl-GPC (16:0/22:6)               | 7.95E-03  | 5.90E-03 | 1.79E-01 | -2.34E-02 | 1.35E-02 | 8.50E-02 | 6.41E-02  | 3.16E-02 | 4.37E-02 |
| 1-stearoyl-2-docosahexaenoyl-GPC (18:0/22:6)                | 7.36E-03  | 5.74E-03 | 2.01E-01 | -4.29E-03 | 1.32E-02 | 7.46E-01 | 6.87E-02  | 3.07E-02 | 2.63E-02 |
| 1-(1-enyl-stearoyl)-2-oleoyl-GPC (P-18:0/18:1)              | 8.09E-03  | 5.82E-03 | 1.66E-01 | -3.73E-03 | 1.34E-02 | 7.81E-01 | 5.64E-02  | 3.13E-02 | 7.26E-02 |
| 1-(1-enyl-stearoyl)-2-arachidonoyl-GPC (P-18:0/20:4)        | -1.14E-02 | 5.70E-03 | 4.63E-02 | -3.03E-02 | 1.31E-02 | 2.14E-02 | -4.38E-02 | 3.08E-02 | 1.56E-01 |
| 1-(1-enyl-stearoyl)-2-oleoyl-GPE (P-18:0/18:1)              | 5.34E-03  | 6.04E-03 | 3.77E-01 | -2.32E-03 | 1.39E-02 | 8.68E-01 | 4.83E-02  | 3.25E-02 | 1.38E-01 |
| sphingomyelin (d18:1/17:0, d17:1/18:0, d19:1/16:0)          | -1.94E-02 | 5.60E-03 | 6.19E-04 | -3.97E-02 | 1.30E-02 | 2.43E-03 | -9.54E-02 | 3.03E-02 | 1.84E-03 |
| 1-palmitoyl-2-stearoyl-GPC (16:0/18:0)                      | 2.29E-03  | 6.10E-03 | 7.07E-01 | -1.59E-02 | 1.40E-02 | 2.56E-01 | 5.23E-02  | 3.27E-02 | 1.11E-01 |
| 2-hydroxybutyrate/2-hydroxyisobutyrate                      | -2.51E-03 | 5.81E-03 | 6.66E-01 | -3.09E-02 | 1.33E-02 | 2.04E-02 | 1.32E-02  | 3.13E-02 | 6.73E-01 |
| oleate/vaccenate (18:1)                                     | -1.03E-02 | 5.55E-03 | 6.46E-02 | -2.73E-02 | 1.28E-02 | 3.33E-02 | -4.95E-02 | 3.00E-02 | 1.00E-01 |
| isoleucylleucine/leucylisoleucine                           | 8.71E-03  | 5.94E-03 | 1.44E-01 | 3.18E-02  | 1.36E-02 | 2.01E-02 | 6.95E-02  | 3.19E-02 | 3.01E-02 |
| aripiprazole                                                | -1.51E-03 | 1.39E-03 | 2.80E-01 | -1.41E-03 | 3.20E-03 | 6.60E-01 | -2.64E-03 | 7.50E-03 | 7.25E-01 |
| rivaroxaban                                                 | 8.65E-04  | 1.06E-03 | 4.16E-01 | -2.89E-05 | 2.45E-03 | 9.91E-01 | 3.04E-03  | 5.73E-03 | 5.96E-01 |
| leucylphenylalanine/isoleucylphenylalanine                  | 1.14E-02  | 6.01E-03 | 5.90E-02 | 2.15E-02  | 1.39E-02 | 1.21E-01 | 4.38E-02  | 3.25E-02 | 1.78E-01 |
| 1-palmitoleoylglycerol (16:1)*                              | 1.70E-03  | 5.55E-03 | 7.60E-01 | -1.39E-02 | 1.28E-02 | 2.78E-01 | -3.96E-02 | 2.98E-02 | 1.85E-01 |
| palmitoyl dihydrosphingomyelin (d18:0/16:0)*                | 9.85E-03  | 5.92E-03 | 9.72E-02 | -1.98E-02 | 1.36E-02 | 1.48E-01 | 7.51E-02  | 3.17E-02 | 1.87E-02 |
| tricosanoyl sphingomyelin (d18:1/23:0)*                     | 2.86E-03  | 5.64E-03 | 6.12E-01 | -1.71E-02 | 1.29E-02 | 1.88E-01 | 1.15E-02  | 3.04E-02 | 7.07E-01 |
| sphingomyelin (d18:2/23:0, d18:1/23:1, d17:1/24:1)*         | -2.83E-03 | 5.10E-03 | 5.80E-01 | -1.79E-02 | 1.17E-02 | 1.26E-01 | 3.93E-03  | 2.75E-02 | 8.86E-01 |
| sphingomyelin (d18:2/24:1, d18:1/24:2)*                     | -3.91E-03 | 5.36E-03 | 4.66E-01 | -3.63E-02 | 1.22E-02 | 3.04E-03 | 9.10E-03  | 2.89E-02 | 7.53E-01 |
| diclofenac                                                  | 8.96E-04  | 1.67E-03 | 5.91E-01 | -3.77E-04 | 3.84E-03 | 9.22E-01 | -8.10E-03 | 8.97E-03 | 3.68E-01 |
| 1-stearoyl-2-linoleoyl-GPE (18:0/18:2)*                     | 9.16E-03  | 6.06E-03 | 1.32E-01 | 1.32E-02  | 1.40E-02 | 3.47E-01 | 5.77E-02  | 3.26E-02 | 7.80E-02 |
| 1-stearoyl-2-arachidonoyl-GPE (18:0/20:4)                   | 2.06E-03  | 6.14E-03 | 7.38E-01 | -8.41E-03 | 1.41E-02 | 5.52E-01 | 2.90E-02  | 3.31E-02 | 3.81E-01 |
| 1-stearoyl-2-linoleoyl-GPC (18:0/18:2)*                     | 3.98E-03  | 5.88E-03 | 4.99E-01 | 7.25E-03  | 1.35E-02 | 5.92E-01 | 5.61E-02  | 3.15E-02 | 7.62E-02 |
| 1-palmitoyl-2-palmitoleoyl-GPC (16:0/16:1)*                 | -1.08E-02 | 5.86E-03 | 6.65E-02 | -4.87E-02 | 1.33E-02 | 2.86E-04 | -6.55E-02 | 3.16E-02 | 3.88E-02 |
| 1-palmitoyl-2-eicosapentaenoyl-GPC (16:0/20:5)*             | 5.82E-03  | 6.03E-03 | 3.35E-01 | -2.13E-02 | 1.39E-02 | 1.25E-01 | 5.75E-02  | 3.24E-02 | 7.68E-02 |
| 1-palmitoyl-2-arachidonoyl-GPE (16:0/20:4)*                 | 2.78E-03  | 6.11E-03 | 6.49E-01 | -2.02E-02 | 1.40E-02 | 1.51E-01 | 1.76E-02  | 3.29E-02 | 5.93E-01 |
| 1-palmitoyl-2-docosahexaenoyl-GPE (16:0/22:6)*              | 8.70E-03  | 6.03E-03 | 1.50E-01 | -1.48E-02 | 1.39E-02 | 2.90E-01 | 5.03E-02  | 3.25E-02 | 1.22E-01 |
| 1-stearoyl-2-docosahexaenoyl-GPE (18:0/22:6)*               | 4.20E-03  | 5.98E-03 | 4.83E-01 | -1.11E-02 | 1.38E-02 | 4.23E-01 | 2.06E-02  | 3.22E-02 | 5.24E-01 |
| 1-palmitoyl-2-arachidonoyl-GPI (16:0/20:4)*                 | -5.61E-03 | 6.17E-03 | 3.64E-01 | -2.52E-02 | 1.41E-02 | 7.63E-02 | -3.34E-02 | 3.33E-02 | 3.16E-01 |
| 1-stearoyl-2-linoleoyl-GPI (18:0/18:2)                      | 1.39E-02  | 5.80E-03 | 1.69E-02 | 7.21E-03  | 1.35E-02 | 5.93E-01 | 9.44E-02  | 3.11E-02 | 2.61E-03 |
| 1-palmitoyl-2-palmitoleoyl-GPE (16:0/16:1)*                 | -2.93E-03 | 4.68E-03 | 5.31E-01 | -1.77E-02 | 1.07E-02 | 9.92E-02 | -3.36E-02 | 2.51E-02 | 1.82E-01 |
| gamma-tocopherol/beta-tocopherol                            | -1.55E-02 | 6.14E-03 | 1.18E-02 | -3.32E-02 | 1.41E-02 | 1.98E-02 | -3.13E-02 | 3.34E-02 | 3.49E-01 |
| 1-(1-enyl-stearoyl)-2-arachidonoyl-GPE (P-18:0/20:4)*       | -1.41E-02 | 5.54E-03 | 1.15E-02 | -4.32E-02 | 1.26E-02 | 7.25E-04 | -3.00E-02 | 3.01E-02 | 3.21E-01 |
| 1-(1-enyl-palmitoyl)-2-docosahexaenoyl-GPE (P-16:0/22:6)*   | 6.17E-03  | 5.61E-03 | 2.72E-01 | -2.08E-02 | 1.29E-02 | 1.07E-01 | 7.32E-02  | 3.00E-02 | 1.52E-02 |
| 1-(1-enyl-palmitoyl)-2-arachidonoyl-GPE (P-16:0/20:4)*      | -3.97E-03 | 5.80E-03 | 4.94E-01 | -2.58E-02 | 1.33E-02 | 5.27E-02 | -8.92E-03 | 3.13E-02 | 7.75E-01 |
| 1-(1-enyl-oleoyl)-2-linoleoyl-GPE (P-18:1/18:2)*            | 7.21E-03  | 6.01E-03 | 2.31E-01 | 1.08E-02  | 1.39E-02 | 4.38E-01 | 7.11E-02  | 3.22E-02 | 2.81E-02 |
| 1-(1-enyl-stearoyl)-2-docosahexaenoyl-GPC (P-18:0/22:6)*    | 6.84E-03  | 5.62E-03 | 2.25E-01 | -1.03E-02 | 1.30E-02 | 4.27E-01 | 8.91E-02  | 2.99E-02 | 3.17E-03 |
| 1-(1-enyl-palmitoyl)-2-oleoyl-GPE (P-16:0/18:1)*            | 8.13E-03  | 6.01E-03 | 1.77E-01 | -1.43E-03 | 1.39E-02 | 9.18E-01 | 6.10E-02  | 3.23E-02 | 5.97E-02 |
| 1-(1-enyl-palmitoyl)-2-dihomo-linolenoyl-GPC (P-16:0/20:3)* | 1.12E-03  | 6.03E-03 | 8.53E-01 | -1.40E-02 | 1.39E-02 | 3.14E-01 | -3.05E-02 | 3.25E-02 | 3.49E-01 |
| 1-(1-enyl-palmitoyl)-2-oleoyl-GPC (P-16:0/18:1)*            | 7.70E-03  | 5.74E-03 | 1.81E-01 | -7.16E-03 | 1.33E-02 | 5.89E-01 | 5.97E-02  | 3.08E-02 | 5.38E-02 |
| 1-(1-enyl-palmitoyl)-2-docosahexaenoyl-GPC (P-16:0/22:6)*   | 9.94E-03  | 5.64E-03 | 7.91E-02 | -1.49E-02 | 1.30E-02 | 2.55E-01 | 8.99E-02  | 3.01E-02 | 3.08E-03 |
| 1-(1-enyl-palmitoyl)-2-linoleoyl-GPC (P-16:0/18:2)*         | 2.24E-03  | 5.83E-03 | 7.01E-01 | 3.21E-03  | 1.34E-02 | 8.11E-01 | 4.51E-02  | 3.13E-02 | 1.51E-01 |
| 1-(1-enyl-palmitoyl)-2-arachidonoyl-GPC (P-16:0/20:4)*      | -1.18E-02 | 5.56E-03 | 3.55E-02 | -4.61E-02 | 1.26E-02 | 3.07E-04 | -4.27E-02 | 3.01E-02 | 1.57E-01 |
| 1-(1-enyl-stearoyl)-2-docosahexaenoyl-GPC (P-18:0/22:6)*    | 9.02E-03  | 5.51E-03 | 1.02E-01 | -3.75E-03 | 1.27E-02 | 7.69E-01 | 9.00E-02  | 2.93E-02 | 2.37E-03 |
| 1-stearoyl-2-arachidonoyl-GPC (O-18:0/20:4)*                | -2.25E-02 | 5.85E-03 | 1.49E-04 | -2.47E-02 | 1.37E-02 | 7.33E-02 | -1.33E-01 | 3.14E-02 | 3.01E-05 |
| 1-palmitoyl-2-oleoyl-GPC (O-16:0/18:1)*                     | -2.56E-04 | 5.99E-03 | 9.66E-01 | -9.54E-03 | 1.38E-02 | 4.89E-01 | 3.30E-03  | 3.23E-02 | 9.19E-01 |
| 1-palmitoyl-2-arachidonoyl-GPC (O-16:0/20:4)*               | -1.84E-02 | 5.70E-03 | 1.36E-03 | -5.02E-02 | 1.30E-02 | 1.45E-04 | -7.69E-02 | 3.09E-02 | 1.35E-02 |
| sphingomyelin (d18:1/21:0, d17:1/22:0, d16:1/23:0)*         | -3.15E-03 | 5.44E-03 | 5.64E-01 | -6.09E-03 | 1.25E-02 | 6.27E-01 | -4.19E-02 | 2.92E-02 | 1.53E-01 |
| behenoyl dihydrosphingomyelin (d18:0/22:0)*                 | -3.55E-03 | 6.14E-03 | 5.64E-01 | -4.05E-02 | 1.39E-02 | 3.92E-03 | 3.13E-04  | 3.31E-02 | 9.92E-01 |
| sphingomyelin (d18:0/18:0, d19:0/17:0)*                     | -2.42E-02 | 5.89E-03 | 5.42E-05 | -8.82E-02 | 1.29E-02 | 5.42E-11 | -9.62E-02 | 3.22E-02 | 3.03E-03 |
| N-palmitoyl-sphinganine (d18:0/16:0)                        | -1.47E-03 | 5.98E-03 | 8.06E-01 | -3.17E-02 | 1.36E-02 | 2.10E-02 | 1.40E-02  | 3.22E-02 | 6.64E-01 |
| lactosyl-N-palmitoyl-sphingosine (d18:1/16:0)               | -6.94E-03 | 5.81E-03 | 2.33E-01 | -3.56E-03 | 1.34E-02 | 7.90E-01 | -2.36E-02 | 3.13E-02 | 4.52E-01 |
| cetirizine                                                  | 3.42E-03  | 3.42E-03 | 3.18E-01 | 6.41E-03  | 7.88E-03 | 4.17E-01 | 7.14E-04  | 1.85E-02 | 9.69E-01 |
| 1-pentadecanoyl-2-linoleoyl-GPC (15:0/18:2)*                | -7.54E-03 | 5.24E-03 | 1.51E-01 | 9.77E-03  | 1.21E-02 | 4.20E-01 | -6.71E-02 | 2.80E-02 | 1.73E-02 |
| 1-margaroyl-2-oleoyl-GPC (17:0/18:1)*                       | 7.85E-03  | 5.67E-03 | 1.67E-01 | 1.71E-02  | 1.31E-02 | 1.92E-01 | 3.60E-02  | 3.06E-02 | 2.40E-01 |
| 1-margaroyl-2-linoleoyl-GPC (17:0/18:2)*                    | 1.13E-02  | 5.57E-03 | 4.40E-02 | 4.68E-02  | 1.26E-02 | 2.47E-04 | 6.46E-02  | 3.00E-02 | 3.19E-02 |
| myristoyl dihydrosphingomyelin (d18:0/14:0)*                | -4.11E-03 | 5.56E-03 | 4.61E-01 | -2.25E-02 | 1.28E-02 | 7.85E-02 | -3.57E-02 | 2.99E-02 | 2.34E-01 |
| 5-hydroxyindole sulfate                                     | -1.44E-03 | 5.90E-03 | 8.07E-01 | 6.12E-03  | 1.36E-02 | 6.52E-01 | -2.38E-02 | 3.18E-02 | 4.54E-01 |
| 7-hydroxyindole sulfate                                     | 6.94E-03  | 5.06E-03 | 1.72E-01 | 1.44E-02  | 1.17E-02 | 2.18E-01 | 4.37E-02  | 2.73E-02 | 1.10E-01 |
| phenylacetylglutamate                                       | -3.47E-03 | 5.55E-03 | 5.33E-01 | 1.11E-02  | 1.28E-02 | 3.86E-01 | -1.24E-02 | 2.99E-02 | 6.78E-01 |
| 1-stearoyl-2-dihomo-linolenoyl-GPC (18:0/20:3n3 or 6)*      | 1.19E-03  | 6.18E-03 | 8.47E-01 | -1.45E-03 | 1.42E-02 | 9.19E-01 | -3.86E-02 | 3.32E-02 | 2.46E-01 |
| palmitoyl-linoleoyl-glycerol (16:0/18:2) [1]*               | 1.87E-04  | 5.88E-03 | 9.75E-01 | -4.41E-04 | 1.35E-02 | 9.74E-01 | -2.74E-02 | 3.17E-02 | 3.88E-01 |
| palmitoyl-linoleoyl-glycerol (16:0/18:2) [2]*               | -4.44E-03 | 5.90E-03 | 4.52E-01 | -1.46E-02 | 1.36E-02 | 2.83E-01 | -5.06E-02 | 3.17E-02 | 1.12E-01 |
| 1-palmitoyl-2-oleoyl-GPI (16:0/18:1)*                       | 3.53E-03  | 6.11E-03 | 5.64E-01 | -1.46E-02 | 1.41E-02 | 2.99E-01 | 2.24E-02  | 3.29E-02 | 4.97E-01 |
| 1-stearoyl-2-docosahexaenoyl-GPI (18:0/22:6)*               | 7.30E-03  | 6.18E-03 | 2.39E-01 | -1.42E-02 | 1.42E-02 | 3.20E-01 | 6.37E-02  | 3.32E-02 | 5.59E-02 |
| 1-(1-enyl-palmitoyl)-2-linoleoyl-GPE (P-16:0/18:2)*         | -2.28E-03 | 6.04E-03 | 7.06E-01 | 3.29E-03  | 1.       |          |           |          |          |

Supplementary Table 2: Parameter estimates for metabolome-wide association studies for diet-metabolite associations for each of: The Healthy Eating Index-2015 (HEI-15), DASH and AMED diet

|                                                            |           |          |          |           |          |          |           |          |          |
|------------------------------------------------------------|-----------|----------|----------|-----------|----------|----------|-----------|----------|----------|
| 1-pentadecanoyl-2-arachidonoyl-GPC (15:0/20:4)*            | -1.61E-02 | 5.84E-03 | 6.29E-03 | -1.45E-02 | 1.36E-02 | 2.88E-01 | -1.12E-01 | 3.12E-02 | 3.94E-04 |
| 1-pentadecanoyl-2-docosahexaenoyl-GPC (15:0/22:6)*         | 6.69E-03  | 5.56E-03 | 2.30E-01 | 1.46E-02  | 1.28E-02 | 2.55E-01 | 3.50E-02  | 3.00E-02 | 2.44E-01 |
| 1-margaroyl-2-arachidonoyl-GPC (17:0/20:4)*                | -1.19E-02 | 5.97E-03 | 4.78E-02 | -8.64E-03 | 1.38E-02 | 5.32E-01 | -7.00E-02 | 3.21E-02 | 3.02E-02 |
| 1-arachidoyl-2-arachidonoyl-GPC (20:0/20:4)*               | 1.22E-02  | 6.02E-03 | 4.31E-02 | 1.30E-02  | 1.39E-02 | 3.51E-01 | 6.42E-02  | 3.24E-02 | 4.89E-02 |
| 1-oleoyl-2-docosahexaenoyl-GPC (18:1/22:6)*                | 2.25E-02  | 5.46E-03 | 4.94E-05 | 3.45E-02  | 1.28E-02 | 7.33E-03 | 1.20E-01  | 2.94E-02 | 6.06E-05 |
| 1-linoleoyl-2-arachidonoyl-GPC (18:2/20:4n6)*              | 8.31E-03  | 5.78E-03 | 1.52E-01 | -1.43E-03 | 1.34E-02 | 9.15E-01 | 5.70E-02  | 3.11E-02 | 6.79E-02 |
| 1-linoleoyl-2-docosahexaenoyl-GPC (18:2/22:6)*             | 1.94E-02  | 5.51E-03 | 5.00E-04 | 6.11E-03  | 1.30E-02 | 6.38E-01 | 1.22E-01  | 2.95E-02 | 4.67E-05 |
| 1-palmityl-2-linoleoyl-GPC (O-16:0/18:2)*                  | -3.93E-03 | 5.96E-03 | 5.10E-01 | -1.72E-02 | 1.37E-02 | 2.10E-01 | -6.65E-03 | 3.21E-02 | 8.36E-01 |
| 1-(1-enyl-stearoyl)-2-linoleoyl-GPC (P-18:0/18:2)*         | 3.32E-03  | 5.90E-03 | 5.75E-01 | -2.86E-03 | 1.36E-02 | 8.33E-01 | 5.04E-02  | 3.17E-02 | 1.13E-01 |
| 1-myristoyl-2-linoleoyl-GPC (14:0/18:2)*                   | -4.65E-03 | 5.90E-03 | 4.32E-01 | -1.52E-02 | 1.36E-02 | 2.64E-01 | -3.60E-02 | 3.18E-02 | 2.58E-01 |
| 1-myristoyl-2-arachidonoyl-GPC (14:0/20:4)*                | -9.45E-04 | 6.00E-03 | 8.75E-01 | -2.76E-02 | 1.37E-02 | 4.49E-02 | -1.54E-02 | 3.23E-02 | 6.33E-01 |
| 1-myristoyl-2-docosahexaenoyl-GPC (14:0/22:6)*             | 1.38E-02  | 5.75E-03 | 1.69E-02 | 6.79E-04  | 1.34E-02 | 9.60E-01 | 8.80E-02  | 3.09E-02 | 4.72E-03 |
| 1-stearoyl-2-docosapentaenoyl-GPC (18:0/22:5n3)*           | 1.53E-03  | 6.10E-03 | 8.02E-01 | 1.51E-02  | 1.40E-02 | 2.81E-01 | 6.24E-03  | 3.29E-02 | 8.49E-01 |
| 1-stearoyl-2-docosapentaenoyl-GPC (18:0/22:5n6)*           | -1.71E-02 | 5.59E-03 | 2.48E-03 | -3.34E-02 | 1.29E-02 | 1.03E-02 | -1.36E-01 | 2.95E-02 | 5.87E-06 |
| 1-palmitoyl-2-adrenoyl-GPC (16:0/22:4)*                    | -1.16E-02 | 5.90E-03 | 5.10E-02 | -3.19E-02 | 1.35E-02 | 1.92E-02 | -8.24E-02 | 3.16E-02 | 9.67E-03 |
| 1-stearoyl-2-adrenoyl-GPC (18:0/22:4)*                     | -1.64E-02 | 5.57E-03 | 3.49E-03 | -3.57E-02 | 1.28E-02 | 5.78E-03 | -9.03E-02 | 3.00E-02 | 2.86E-03 |
| 1-stearyl-GPC (O-18:0)*                                    | 3.06E-03  | 5.50E-03 | 5.79E-01 | 8.09E-03  | 1.27E-02 | 5.23E-01 | 4.70E-03  | 2.97E-02 | 8.74E-01 |
| 1-myristoyl-2-palmitoleoyl-GPC (14:0/16:1)*                | -5.94E-03 | 5.82E-03 | 3.08E-01 | -1.91E-02 | 1.34E-02 | 1.53E-01 | -5.24E-02 | 3.13E-02 | 9.51E-02 |
| 1-stearoyl-2-meadoyl-GPC (18:0/20:3n9)*                    | -5.02E-03 | 5.53E-03 | 3.65E-01 | -2.04E-02 | 1.27E-02 | 1.09E-01 | -3.17E-02 | 2.98E-02 | 2.87E-01 |
| 1-(1-enyl-palmitoyl)-2-palmitoleoyl-GPC (P-16:0/16:1)*     | -2.67E-03 | 5.87E-03 | 6.50E-01 | -3.87E-02 | 1.33E-02 | 3.53E-03 | 6.76E-03  | 3.17E-02 | 8.31E-01 |
| 1-(1-enyl-palmitoyl)-2-myristoyl-GPC (P-16:0/14:0)*        | -1.66E-02 | 5.88E-03 | 5.16E-03 | -3.09E-02 | 1.36E-02 | 2.39E-02 | -5.93E-02 | 3.19E-02 | 6.42E-02 |
| 1-(1-enyl-palmitoyl)-2-palmitoyl-GPC (P-16:0/16:0)*        | -8.84E-03 | 5.95E-03 | 1.39E-01 | -3.97E-02 | 1.36E-02 | 3.64E-03 | -1.01E-02 | 3.22E-02 | 7.55E-01 |
| phosphatidylcholine (16:0/22:5n3, 18:1/20:4)*              | 4.66E-03  | 5.89E-03 | 4.30E-01 | 1.21E-02  | 1.36E-02 | 3.73E-01 | 5.59E-02  | 3.16E-02 | 7.81E-02 |
| phosphatidylcholine (18:0/20:5, 16:0/22:5n6)*              | 4.52E-03  | 5.55E-03 | 4.16E-01 | -1.15E-02 | 1.28E-02 | 3.67E-01 | 2.64E-02  | 2.99E-02 | 3.77E-01 |
| 1-palmitoyl-2-docosahexaenoyl-GPI (16:0/22:6)*             | 3.95E-03  | 6.10E-03 | 5.17E-01 | -6.84E-03 | 1.40E-02 | 6.27E-01 | 4.12E-02  | 3.28E-02 | 2.10E-01 |
| 1-stearoyl-2-oleoyl-GPI (18:0/18:1)*                       | 2.21E-02  | 6.01E-03 | 2.83E-04 | 3.17E-02  | 1.40E-02 | 2.47E-02 | 1.10E-01  | 3.25E-02 | 8.14E-04 |
| 1-stearoyl-2-dihomo-linolenoyl-GPI (18:0/20:3n3 or 6)*     | 1.30E-02  | 5.78E-03 | 2.52E-02 | 1.02E-02  | 1.34E-02 | 4.47E-01 | 3.89E-02  | 3.13E-02 | 2.16E-01 |
| 1-stearyl-GPE (O-18:0)*                                    | 7.32E-03  | 5.51E-03 | 1.85E-01 | 1.29E-02  | 1.27E-02 | 3.09E-01 | 5.58E-02  | 2.96E-02 | 6.03E-02 |
| 1,2-dipalmitoyl-GPE (16:0/16:0)*                           | 4.59E-03  | 5.03E-03 | 3.62E-01 | -6.40E-03 | 1.16E-02 | 5.81E-01 | -1.48E-02 | 2.71E-02 | 5.85E-01 |
| 1-palmitoyl-2-stearoyl-GPE (16:0/18:0)*                    | 2.52E-03  | 5.44E-03 | 6.43E-01 | 7.24E-03  | 1.25E-02 | 5.64E-01 | 2.69E-02  | 2.93E-02 | 3.59E-01 |
| 1-palmitoyl-2-eicosapentaenoyl-GPE (16:0/20:5)*            | 7.48E-03  | 5.32E-03 | 1.61E-01 | -6.49E-05 | 1.23E-02 | 9.96E-01 | 4.50E-02  | 2.86E-02 | 1.17E-01 |
| 1-stearoyl-2-dihomo-linolenoyl-GPE (18:0/20:3n3 or 6)*     | 1.26E-02  | 6.10E-03 | 3.95E-02 | 2.16E-02  | 1.41E-02 | 1.26E-01 | 2.99E-02  | 3.31E-02 | 3.67E-01 |
| 1,2-dilinoeloyl-GPE (18:2/18:2)*                           | 4.93E-03  | 5.34E-03 | 3.57E-01 | 1.53E-02  | 1.23E-02 | 2.15E-01 | 6.49E-03  | 2.88E-02 | 8.22E-01 |
| 1-oleoyl-2-arachidonoyl-GPE (18:1/20:4)*                   | 1.30E-02  | 6.19E-03 | 3.61E-02 | 2.41E-02  | 1.43E-02 | 9.27E-02 | 8.24E-02  | 3.32E-02 | 1.38E-02 |
| 1-(1-enyl-stearoyl)-2-linoleoyl-GPE (P-18:0/18:2)*         | 1.57E-05  | 5.97E-03 | 9.98E-01 | 8.59E-04  | 1.37E-02 | 9.50E-01 | 3.40E-02  | 3.21E-02 | 2.90E-01 |
| 1-linoleoyl-GPG (18:2)*                                    | -4.99E-03 | 6.04E-03 | 4.09E-01 | -4.64E-03 | 1.39E-02 | 7.39E-01 | -4.75E-02 | 3.24E-02 | 1.44E-01 |
| thioproline                                                | -1.60E-02 | 5.69E-03 | 5.19E-03 | -3.65E-02 | 1.31E-02 | 5.69E-03 | -5.02E-02 | 3.09E-02 | 1.06E-01 |
| palmitoylcholine                                           | 1.47E-02  | 5.90E-03 | 1.35E-02 | 3.10E-02  | 1.36E-02 | 2.35E-02 | 8.34E-02  | 3.17E-02 | 9.07E-03 |
| trans-3,4-methyleneheptanoylcarnitine                      | -1.26E-02 | 5.73E-03 | 2.82E-02 | -9.55E-03 | 1.33E-02 | 4.73E-01 | -3.39E-02 | 3.11E-02 | 2.77E-01 |
| glycocholate glucuronide (1)                               | 9.80E-04  | 5.12E-03 | 8.48E-01 | 2.12E-03  | 1.18E-02 | 8.57E-01 | 5.68E-03  | 2.76E-02 | 8.37E-01 |
| glycochenodeoxycholate glucuronide (1)                     | -8.36E-03 | 5.50E-03 | 1.30E-01 | -2.31E-02 | 1.26E-02 | 6.93E-02 | -5.43E-02 | 2.96E-02 | 6.77E-02 |
| (S)-3-hydroxybutyrylcarnitine                              | -1.07E-02 | 5.52E-03 | 5.41E-02 | -7.04E-03 | 1.28E-02 | 5.83E-01 | -3.59E-02 | 2.99E-02 | 2.31E-01 |
| glycosyl-N-palmitoyl-sphingosine (d18:1/16:0)              | -1.48E-02 | 6.02E-03 | 1.47E-02 | -3.75E-02 | 1.38E-02 | 7.11E-03 | -4.32E-02 | 3.27E-02 | 1.87E-01 |
| catechol glucuronide                                       | 1.93E-02  | 4.71E-03 | 5.42E-05 | 3.60E-02  | 1.10E-02 | 1.14E-03 | 6.91E-02  | 2.58E-02 | 7.90E-03 |
| ascorbic acid 2-sulfate                                    | 2.08E-02  | 5.57E-03 | 2.29E-04 | 5.51E-02  | 1.27E-02 | 2.09E-05 | 5.37E-02  | 3.06E-02 | 8.06E-02 |
| oleoylcholine                                              | 1.90E-02  | 5.84E-03 | 1.24E-03 | 4.31E-02  | 1.34E-02 | 1.52E-03 | 1.00E-01  | 3.15E-02 | 1.67E-03 |
| arachidonoylcholine                                        | 9.44E-03  | 5.88E-03 | 1.10E-01 | 2.15E-02  | 1.35E-02 | 1.14E-01 | 6.57E-02  | 3.16E-02 | 3.85E-02 |
| docosahexaenoylcholine                                     | 1.90E-02  | 5.64E-03 | 8.82E-04 | 2.90E-02  | 1.31E-02 | 2.80E-02 | 1.20E-01  | 3.01E-02 | 8.76E-05 |
| palmitoleoylcholine                                        | 7.35E-03  | 5.12E-03 | 1.52E-01 | 7.17E-03  | 1.18E-02 | 5.45E-01 | 2.76E-02  | 2.77E-02 | 3.19E-01 |
| dihomo-linolenoyl-choline                                  | 1.67E-02  | 5.91E-03 | 5.21E-03 | 3.99E-02  | 1.36E-02 | 3.63E-03 | 5.75E-02  | 3.21E-02 | 7.48E-02 |
| caffeic acid sulfate                                       | 1.17E-02  | 4.97E-03 | 1.94E-02 | 1.89E-02  | 1.15E-02 | 1.01E-01 | 4.99E-02  | 2.69E-02 | 6.46E-02 |
| 1-linoleoyl-2-linolenoyl-GPC (18:2/18:3)*                  | 1.15E-02  | 5.73E-03 | 4.62E-02 | 2.21E-02  | 1.32E-02 | 9.51E-02 | 9.02E-02  | 3.06E-02 | 3.53E-03 |
| 1-palmitoleoyl-2-linolenoyl-GPC (16:1/18:3)*               | -3.60E-04 | 5.36E-03 | 9.46E-01 | -2.51E-03 | 1.23E-02 | 8.39E-01 | 1.59E-02  | 2.89E-02 | 5.82E-01 |
| phosphatidylcholine (14:0/14:0, 16:0/12:0)                 | -4.90E-03 | 6.03E-03 | 4.17E-01 | -1.31E-02 | 1.39E-02 | 3.45E-01 | -4.62E-02 | 3.24E-02 | 1.55E-01 |
| phosphatidylcholine (15:0/18:1, 17:0/16:1, 16:0/17:1)*     | -9.72E-03 | 5.52E-03 | 7.93E-02 | -1.70E-02 | 1.27E-02 | 1.82E-01 | -7.36E-02 | 2.96E-02 | 1.34E-02 |
| 1-oleoyl-2-dihomo-linoleoyl-GPC (18:1/20:2)*               | 1.86E-02  | 5.69E-03 | 1.24E-03 | 3.40E-02  | 1.32E-02 | 1.05E-02 | 6.30E-02  | 3.10E-02 | 4.31E-02 |
| 1-oleoyl-2-docosapentaenoyl-GPC (18:1/22:5n3)*             | 1.26E-02  | 5.76E-03 | 2.93E-02 | 3.24E-02  | 1.32E-02 | 1.51E-02 | 5.19E-02  | 3.12E-02 | 9.73E-02 |
| phosphatidylcholine (18:0/20:2, 20:0/18:2)*                | 2.55E-02  | 5.98E-03 | 2.78E-05 | 3.12E-02  | 1.41E-02 | 2.75E-02 | 1.18E-01  | 3.25E-02 | 3.54E-04 |
| 1-(1-enyl-oleoyl)-2-docosahexaenoyl-GPE (P-18:1/22:6)*     | 1.69E-02  | 5.58E-03 | 2.68E-03 | 2.57E-03  | 1.31E-02 | 8.44E-01 | 1.41E-01  | 2.94E-02 | 2.78E-06 |
| 1-(1-enyl-stearoyl)-2-dihomo-linolenoyl-GPE (P-18:0/20:3)* | -4.03E-03 | 6.04E-03 | 5.05E-01 | -1.35E-02 | 1.39E-02 | 3.31E-01 | -4.40E-02 | 3.25E-02 | 1.77E-01 |
| lisinopril                                                 | -1.88E-03 | 2.38E-03 | 4.29E-01 | -2.07E-04 | 5.48E-03 | 9.70E-01 | 1.54E-02  | 1.28E-02 | 2.29E-01 |
| lamotrigine                                                | -4.61E-05 | 1.42E-03 | 9.74E-01 | -4.36E-03 | 3.25E-03 | 1.81E-01 | -6.62E-04 | 7.64E-03 | 9.31E-01 |
| hexadecatrienoate (16:3n3)                                 | 1.60E-02  | 5.18E-03 | 2.18E-03 | 2.93E-02  | 1.20E-02 | 1.51E-02 | 7.03E-02  | 2.81E-02 | 1.28E-02 |
| hexadecadienoate (16:2n6)                                  | -1.72E-02 | 5.58E-03 | 2.30E-03 | -3.26E-02 | 1.29E-02 | 1.22E-02 | -6.36E-02 | 3.03E-02 | 3.68E-02 |
| 1-myristoyl-2-eicosapentaenoyl-GPC (14:0/20:5)*            | 1.02E-02  | 5.81E-03 | 7.96E-02 | -2.27E-03 | 1.34E-02 | 8.66E-01 | 6.72E-02  | 3.12E-02 | 3.23E-02 |
| palmitoleoylcarnitine (C16:1)*                             | -1.44E-02 | 5.60E-03 | 1.05E-02 | -4.75E-02 | 1.27E-02 | 2.35E-04 | -5.99E-02 | 3.03E-02 | 4.93E-02 |
| 4-acetamidobenzoate                                        | 1.29E-02  | 4.81E-03 | 7.59E-03 | 3.43E-02  | 1.10E-02 | 2.09E-03 | 7.40E-02  | 2.59E-02 | 4.62E-03 |
| 4-hydroxyphenylacetylglutamine                             | -2.39E-04 | 5.89E-03 | 9.68E-01 | 1.11E-02  | 1.35E-02 | 4.13E-01 | 2.21E-02  | 3.17E-02 | 4.86E-01 |
| 4-aminophenol sulfate (2)                                  | 2.43E-03  | 1.06E-03 | 2.26E-02 | 5.22E-03  | 2.44E-03 | 3.32E-02 | 6.68E-03  | 5.74E-03 | 2.46E-01 |
| 2'-O-methyluridine                                         | -9.90E-03 | 5.80E-03 | 8.86E-02 | -1.90E-03 | 1.34E-02 | 8.87E-01 | -4.33E-02 | 3.13E-02 | 1.68E-01 |
| gamma-glutamyl-alpha-lysine                                | -5.35E-03 | 5.95E-03 | 3.69E-01 | -3.45E-03 | 1.37E-02 | 8.01E-01 | -4.82E-02 | 3.20E-02 | 1.33E-01 |
| palmitoyl-oleoyl-glycerol (16:0/18:1) [1]*                 | -1.92E-03 | 5.87E-03 | 7.45E-01 | -1.59E-02 | 1.35E-02 | 2.41E-01 | -4.52E-02 | 3.15E-02 | 1.53E-01 |
| palmitoyl-oleoyl-glycerol (16:0/18:1) [2]*                 | -3.24E-03 | 5.91E-03 | 5.84E-01 | -1.65E-02 | 1.36E-02 | 2.24E-01 | -4.43E-02 | 3.17E-02 | 1.64E-01 |
| oleoyl-oleoyl-glycerol (18:1/18:1) [1]*                    | 1.11E-02  | 5.93E-03 | 6.34E-02 | 2.10E-02  | 1.37E-02 | 1.25E-01 | 3.56E-02  | 3.21E-02 | 2.68E-01 |
| oleoyl-oleoyl-glycerol (18:1/18:1) [2]*                    | 1.32E-02  | 5.93E-03 | 2.68E-02 | 1.92E-02  | 1.37E-02 | 1.63E-01 | 3.95E-02  | 3.22E-02 | 2.21E-01 |
| linoleoyl-arachidonoyl-glycerol (18:2/20:4) [1]*           | -3.76E-03 | 5.83E-03 | 5.19E-01 | -9.04E-03 | 1.34E-02 | 5.01E-01 | -1.11E-02 | 3.14E-02 | 7.25E-01 |
| linoleoyl-arachidonoyl-glycerol (18:2/20:4) [2]*           | -7.41E-03 | 5.92E-03 | 2.12E-01 | -2.33E-02 | 1.36E-02 | 8.83E-02 | -2.20E-02 | 3.20E-02 | 4.92E-01 |
| palmitoyl-arachidonoyl-glycerol (16:0/20:4) [1]*           | -9.39E-03 | 5.52E-03 | 9.00E-02 | -3.00E-02 | 1.26E-02 | 1.81E-02 | -8.74E-02 | 2.94E-02 | 3.23E-03 |
| palmitoyl-arachidonoyl-glycerol (16:0/20:4) [2]*           | -1.07E-02 | 5.60E-03 | 5.76E-02 | -3.63E-02 | 1.28E-02 | 4.86E-03 | -5.33E-02 | 3.02E-02 | 7.88E-02 |
| linoleoyl-linolenoyl-glycerol (18:2/18:3) [1]*             | 5.88E-03  | 5.59E-03 | 2.93E-01 | 1.92E-02  | 1.28E-02 | 1.35E-01 | 1.65E-02  | 3.02E-02 | 5.85E-01 |
| linoleoyl-linolenoyl-glycerol (18:2/18:3) [2]*             | 6.63E-03  | 5.86E-03 | 2.59E-01 | 1.61E-02  | 1.35E-02 | 2.35E-01 | 4.86E-02  | 3.15E-02 | 1.25E-01 |
| linoleoyl-docosahexaenoyl-glycerol (18:2/22:6) [2]*        | 1.06E-02  | 5.92E-03 | 7.40E-02 | -2.82E-03 | 1.37E-02 | 8.37E-01 | 3.79E-02  | 3.20E-02 | 2.37E-01 |
| palmitoleoyl-linoleoyl-glycerol (16:1/18:2) [1]*           | -7.30E-03 | 5.66E-03 | 1.98E-01 | -2.22E-02 |          |          |           |          |          |

Supplementary Table 2: Parameter estimates for metabolome-wide association studies for diet-metabolite associations for each of: The Healthy Eating Index-2015 (HEI-15), DASH and AMED diet

|                                                                 |           |          |          |           |          |          |           |          |          |
|-----------------------------------------------------------------|-----------|----------|----------|-----------|----------|----------|-----------|----------|----------|
| diacylglycerol (14:0/18:1, 16:0/16:1) [2]*                      | 1.58E-03  | 5.68E-03 | 7.81E-01 | -6.32E-03 | 1.31E-02 | 6.29E-01 | -2.14E-02 | 3.06E-02 | 4.85E-01 |
| oleoyl-arachidonoyl-glycerol (18:1/20:4) [1]*                   | 1.43E-03  | 6.01E-03 | 8.13E-01 | -8.74E-03 | 1.38E-02 | 5.28E-01 | -5.63E-03 | 3.24E-02 | 8.62E-01 |
| oleoyl-arachidonoyl-glycerol (18:1/20:4) [2]*                   | -1.36E-03 | 5.99E-03 | 8.21E-01 | -1.01E-02 | 1.38E-02 | 4.62E-01 | -2.04E-02 | 3.23E-02 | 5.29E-01 |
| palmitoyl-linolenoyl-glycerol (16:0/18:3) [2]*                  | 2.32E-03  | 5.35E-03 | 6.65E-01 | 2.28E-03  | 1.23E-02 | 8.53E-01 | -2.04E-02 | 2.88E-02 | 4.79E-01 |
| diacylglycerol (16:1/18:2 [2], 16:0/18:3 [1])*                  | 2.62E-03  | 6.11E-03 | 6.68E-01 | 1.91E-03  | 1.41E-02 | 8.92E-01 | 5.00E-04  | 3.29E-02 | 9.88E-01 |
| linoleoyl-linoleoyl-glycerol (18:2/18:2) [1]*                   | 9.26E-04  | 5.95E-03 | 8.76E-01 | 1.39E-02  | 1.37E-02 | 3.12E-01 | -4.42E-03 | 3.21E-02 | 8.91E-01 |
| linoleoyl-linoleoyl-glycerol (18:2/18:2) [2]*                   | 1.08E-02  | 6.02E-03 | 7.46E-02 | 2.09E-02  | 1.39E-02 | 1.33E-01 | 3.81E-02  | 3.25E-02 | 2.42E-01 |
| stearoyl-arachidonoyl-glycerol (18:0/20:4) [1]*                 | 8.86E-03  | 6.09E-03 | 1.47E-01 | 3.62E-05  | 1.41E-02 | 9.98E-01 | 5.43E-02  | 3.28E-02 | 9.93E-02 |
| stearoyl-arachidonoyl-glycerol (18:0/20:4) [2]*                 | -4.14E-03 | 5.64E-03 | 4.64E-01 | -2.57E-02 | 1.29E-02 | 4.76E-02 | 1.92E-02  | 3.04E-02 | 5.28E-01 |
| perfluorooctanesulfonate (PFOS)                                 | 4.35E-03  | 5.38E-03 | 4.20E-01 | 1.66E-03  | 1.24E-02 | 8.94E-01 | 7.99E-03  | 2.90E-02 | 7.83E-01 |
| 1-palmityl-GPE (O-16:0)*                                        | 6.43E-03  | 5.58E-03 | 2.50E-01 | -5.71E-03 | 1.29E-02 | 6.58E-01 | 3.33E-02  | 3.01E-02 | 2.69E-01 |
| 1-palmityl-2-stearoyl-GPC (O-16:0/18:0)*                        | -8.39E-03 | 6.09E-03 | 1.69E-01 | -5.65E-03 | 1.41E-02 | 6.88E-01 | -4.89E-02 | 3.28E-02 | 1.37E-01 |
| 1-palmityl-2-palmitoyl-GPC (O-16:0/16:0)*                       | -2.28E-02 | 5.89E-03 | 1.38E-04 | -4.64E-02 | 1.36E-02 | 7.72E-04 | -1.12E-01 | 3.19E-02 | 5.24E-04 |
| 1-stearyl-2-docosapentaenoyl-GPC (O-18:0/22:5n3)*               | -1.01E-02 | 5.64E-03 | 7.53E-02 | -8.47E-03 | 1.31E-02 | 5.17E-01 | -4.25E-02 | 3.05E-02 | 1.64E-01 |
| 1-stearyl-2-linoleoyl-GPC (O-18:0/18:2)*                        | -4.94E-03 | 5.97E-03 | 4.08E-01 | -3.99E-03 | 1.37E-02 | 7.72E-01 | 1.56E-03  | 3.22E-02 | 9.61E-01 |
| 1-stearoyl-2-docosapentaenoyl-GPE (18:0/22:5n3)*                | 3.40E-03  | 6.03E-03 | 5.74E-01 | 1.11E-02  | 1.39E-02 | 4.23E-01 | 3.67E-02  | 3.25E-02 | 2.60E-01 |
| 1-stearoyl-2-docosapentaenoyl-GPE (18:0/22:5n6)*                | -1.26E-02 | 5.96E-03 | 3.59E-02 | -3.42E-02 | 1.37E-02 | 1.29E-02 | -7.70E-02 | 3.20E-02 | 1.70E-02 |
| 1-stearoyl-2-adrenoyl-GPE (18:0/22:4)*                          | -9.36E-03 | 5.83E-03 | 1.09E-01 | -2.50E-02 | 1.34E-02 | 6.25E-02 | -5.28E-02 | 3.14E-02 | 9.33E-02 |
| 1-(1-enyl-stearoyl)-2-docosapentaenoyl-GPE (P-18:0/22:5n3)*     | -1.27E-02 | 5.60E-03 | 2.40E-02 | -3.56E-02 | 1.28E-02 | 5.91E-03 | -2.80E-02 | 3.04E-02 | 3.57E-01 |
| N-palmitoyl-sphingadienine (d18:2/16:0)*                        | 3.34E-03  | 5.90E-03 | 5.72E-01 | 2.66E-03  | 1.36E-02 | 8.45E-01 | 3.95E-02  | 3.17E-02 | 2.15E-01 |
| lactosyl-N-nervonoyl-sphingosine (d18:1/24:1)*                  | 8.96E-03  | 5.75E-03 | 1.20E-01 | 1.14E-02  | 1.33E-02 | 3.90E-01 | 6.40E-02  | 3.09E-02 | 3.91E-02 |
| glycosyl-N-behenoyl-sphingosine (d18:1/22:0)*                   | 3.05E-03  | 6.02E-03 | 6.13E-01 | 1.10E-02  | 1.38E-02 | 4.28E-01 | 3.44E-02  | 3.24E-02 | 2.90E-01 |
| lactosyl-N-behenoyl-sphingosine (d18:1/22:0)*                   | 2.31E-03  | 5.72E-03 | 6.87E-01 | 2.65E-02  | 1.31E-02 | 4.38E-02 | -3.10E-03 | 3.08E-02 | 9.20E-01 |
| N-behenoyl-sphingadienine (d18:2/22:0)*                         | 3.21E-03  | 5.88E-03 | 5.85E-01 | 2.74E-02  | 1.34E-02 | 4.25E-02 | 1.27E-02  | 3.17E-02 | 6.89E-01 |
| glycosyl-N-behenoyl-sphingadienine (d18:2/22:0)*                | 2.22E-03  | 5.87E-03 | 7.05E-01 | -8.52E-04 | 1.35E-02 | 9.50E-01 | 5.44E-02  | 3.15E-02 | 8.53E-02 |
| N-stearoyl-sphingadienine (d18:2/18:0)*                         | -1.52E-02 | 5.57E-03 | 6.86E-03 | -3.24E-02 | 1.29E-02 | 1.23E-02 | -6.49E-02 | 3.02E-02 | 3.24E-02 |
| N-palmitoylserine                                               | 6.01E-03  | 5.46E-03 | 2.72E-01 | -9.80E-04 | 1.26E-02 | 9.38E-01 | -3.64E-03 | 2.95E-02 | 9.02E-01 |
| N-oleoylserine                                                  | 4.81E-03  | 6.18E-03 | 4.37E-01 | 1.04E-02  | 1.42E-02 | 4.67E-01 | 5.10E-02  | 3.32E-02 | 1.26E-01 |
| sphingadienine                                                  | -1.08E-02 | 6.03E-03 | 7.44E-02 | -1.78E-02 | 1.39E-02 | 2.03E-01 | -4.60E-02 | 3.26E-02 | 1.59E-01 |
| palmitoleoyl-arachidonoyl-glycerol (16:1/20:4) [2]*             | 2.29E-03  | 5.91E-03 | 6.99E-01 | 2.89E-03  | 1.36E-02 | 8.32E-01 | 7.86E-03  | 3.19E-02 | 8.05E-01 |
| myristoyl-linoleoyl-glycerol (14:0/18:2) [2]*                   | 5.48E-03  | 5.80E-03 | 3.45E-01 | 1.64E-02  | 1.33E-02 | 2.20E-01 | -3.40E-03 | 3.13E-02 | 9.14E-01 |
| phosphatidylethanolamine (P-18:1/20:4, P-16:0/22:5n3)*          | -2.06E-03 | 5.89E-03 | 7.27E-01 | -2.69E-02 | 1.35E-02 | 4.68E-02 | 2.81E-02  | 3.17E-02 | 3.75E-01 |
| 1-stearoyl-2-(hydroxylinooleoyl)-GPC (18:0/18:2(OH))*           | -1.03E-02 | 5.77E-03 | 7.40E-02 | -2.82E-02 | 1.32E-02 | 3.42E-02 | -2.20E-02 | 3.12E-02 | 4.81E-01 |
| 1-palmitoyl-2-(hydroxylinooleoyl)-GPC (16:0/18:2(OH))*          | -1.34E-02 | 5.79E-03 | 2.14E-02 | -3.66E-02 | 1.33E-02 | 6.14E-03 | -1.89E-02 | 3.15E-02 | 5.48E-01 |
| hexadecaphosphingosine (d16:1)*                                 | -5.99E-03 | 5.92E-03 | 3.13E-01 | -1.39E-02 | 1.36E-02 | 3.08E-01 | -5.89E-02 | 3.18E-02 | 6.48E-02 |
| ceramide (d16:1/24:1, d18:1/22:1)*                              | -2.17E-04 | 5.76E-03 | 9.70E-01 | -1.16E-02 | 1.32E-02 | 3.82E-01 | -5.59E-02 | 3.09E-02 | 7.15E-02 |
| N-palmitoyl-heptadecaphosphingosine (d17:1/16:0)*               | -9.78E-03 | 5.65E-03 | 8.45E-02 | -2.15E-02 | 1.30E-02 | 1.00E-01 | -9.00E-02 | 3.01E-02 | 3.09E-03 |
| ceramide (d18:1/14:0, d16:1/16:0)*                              | 6.20E-03  | 5.96E-03 | 2.99E-01 | 1.23E-02  | 1.37E-02 | 3.72E-01 | -7.66E-03 | 3.22E-02 | 8.12E-01 |
| ceramide (d18:1/17:0, d17:1/18:0)*                              | -1.62E-02 | 5.76E-03 | 5.30E-03 | -3.22E-02 | 1.33E-02 | 1.59E-02 | -1.02E-01 | 3.09E-02 | 1.05E-03 |
| ceramide (d18:2/24:1, d18:1/24:2)*                              | -2.42E-03 | 5.88E-03 | 6.81E-01 | -1.27E-02 | 1.35E-02 | 3.48E-01 | -1.85E-02 | 3.17E-02 | 5.60E-01 |
| glycosyl ceramide (d18:2/24:1, d18:1/24:2)*                     | -3.42E-03 | 5.73E-03 | 5.51E-01 | -2.12E-02 | 1.31E-02 | 1.08E-01 | 2.88E-02  | 3.09E-02 | 3.51E-01 |
| glycosyl-N-tricosanoyl-sphingadienine (d18:2/23:0)*             | -1.37E-03 | 5.72E-03 | 8.12E-01 | -1.27E-02 | 1.32E-02 | 3.35E-01 | 3.76E-02  | 3.08E-02 | 2.22E-01 |
| glycosyl ceramide (d18:1/23:1, d17:1/24:1)*                     | -1.33E-02 | 5.54E-03 | 1.66E-02 | -3.01E-02 | 1.27E-02 | 1.89E-02 | -9.34E-02 | 2.96E-02 | 1.78E-03 |
| glycosyl-N-(2-hydroxynervonoyl)-sphingosine (d18:1/24:1(2OH))*  | 1.71E-03  | 5.52E-03 | 7.57E-01 | -2.35E-02 | 1.26E-02 | 6.44E-02 | -1.29E-02 | 2.97E-02 | 6.65E-01 |
| ceramide (d18:1/20:0, d16:1/22:0, d20:1/18:0)*                  | -1.82E-04 | 5.92E-03 | 9.75E-01 | 1.09E-02  | 1.36E-02 | 4.23E-01 | -5.11E-02 | 3.17E-02 | 1.09E-01 |
| stearoylcholine*                                                | 1.40E-02  | 5.92E-03 | 1.87E-02 | 4.13E-02  | 1.35E-02 | 2.48E-03 | 8.70E-02  | 3.18E-02 | 6.62E-03 |
| linoleoylcholine*                                               | 1.72E-02  | 5.81E-03 | 3.41E-03 | 4.46E-02  | 1.33E-02 | 9.33E-04 | 1.04E-01  | 3.12E-02 | 9.74E-04 |
| 1-adrenoyl-GPE (22:4)*                                          | -1.59E-02 | 5.75E-03 | 6.06E-03 | -2.37E-02 | 1.34E-02 | 7.69E-02 | -9.17E-02 | 3.10E-02 | 3.30E-03 |
| 1-docosapentaenoyl-GPE (22:5n3)*                                | -1.37E-02 | 5.90E-03 | 2.06E-02 | -2.01E-02 | 1.36E-02 | 1.43E-01 | -3.90E-02 | 3.20E-02 | 2.24E-01 |
| trazadone                                                       | -4.18E-04 | 2.27E-03 | 8.54E-01 | -4.87E-03 | 5.22E-03 | 3.52E-01 | -1.77E-02 | 1.22E-02 | 1.49E-01 |
| nisinate (24:6n3)                                               | 9.84E-03  | 5.21E-03 | 6.00E-02 | 1.10E-03  | 1.21E-02 | 9.28E-01 | 6.44E-02  | 2.80E-02 | 2.23E-02 |
| sphingomyelin (d18:0/20:0, d16:0/22:0)*                         | -9.14E-03 | 6.04E-03 | 1.32E-01 | -4.88E-02 | 1.37E-02 | 4.13E-04 | -3.63E-02 | 3.26E-02 | 2.67E-01 |
| sphingomyelin (d18:1/19:0, d19:1/18:0)*                         | -1.50E-02 | 5.46E-03 | 6.34E-03 | -3.59E-02 | 1.25E-02 | 4.48E-03 | -8.38E-02 | 2.94E-02 | 4.66E-03 |
| sphingomyelin (d18:2/18:1)*                                     | -2.11E-02 | 5.37E-03 | 1.09E-04 | -3.59E-02 | 1.25E-02 | 4.44E-03 | -7.68E-02 | 2.94E-02 | 9.40E-03 |
| sphingomyelin (d18:2/24:2)*                                     | -1.49E-02 | 5.44E-03 | 6.54E-03 | -3.63E-02 | 1.25E-02 | 4.00E-03 | -4.92E-02 | 2.95E-02 | 9.73E-02 |
| sphingomyelin (d18:2/21:0, d16:2/23:0)*                         | -1.07E-02 | 4.95E-03 | 3.17E-02 | -2.02E-02 | 1.14E-02 | 7.83E-02 | -4.87E-02 | 2.68E-02 | 7.00E-02 |
| sphingomyelin (d18:2/23:1)*                                     | -1.73E-02 | 5.22E-03 | 1.05E-03 | -4.86E-02 | 1.19E-02 | 5.90E-05 | -9.34E-02 | 2.81E-02 | 1.02E-03 |
| sphingomyelin (d18:1/25:0, d19:0/24:1, d20:1/23:0, d19:1/24:0)* | -1.04E-02 | 5.83E-03 | 7.55E-02 | -2.61E-02 | 1.34E-02 | 5.29E-02 | -6.28E-02 | 3.14E-02 | 4.64E-02 |
| sphingomyelin (d17:2/16:0, d18:2/15:0)*                         | -8.94E-03 | 5.15E-03 | 8.41E-02 | -1.82E-02 | 1.19E-02 | 1.26E-01 | -3.95E-02 | 2.78E-02 | 1.57E-01 |
| heneicosapentaenoate (21:5n3)                                   | 9.73E-03  | 4.82E-03 | 4.45E-02 | -7.50E-03 | 1.12E-02 | 5.03E-01 | 7.33E-02  | 2.58E-02 | 4.82E-03 |
| linolenoylcarnitine (C18:3)*                                    | -8.21E-03 | 5.94E-03 | 1.68E-01 | -1.09E-02 | 1.37E-02 | 4.28E-01 | -5.70E-03 | 3.21E-02 | 8.59E-01 |
| behenoylcarnitine (C22)*                                        | 1.10E-02  | 6.18E-03 | 7.62E-02 | 1.74E-02  | 1.43E-02 | 2.23E-01 | 5.68E-02  | 3.33E-02 | 8.94E-02 |
| arachidoylcarnitine (C20)*                                      | 9.42E-03  | 5.99E-03 | 1.17E-01 | 2.61E-02  | 1.38E-02 | 5.84E-02 | 4.73E-02  | 3.23E-02 | 1.44E-01 |
| lignoceroylcarnitine (C24)*                                     | 1.13E-02  | 6.18E-03 | 6.82E-02 | 2.32E-02  | 1.42E-02 | 1.04E-01 | 6.35E-02  | 3.33E-02 | 5.77E-02 |
| cerotoylcarnitine (C26)*                                        | 1.65E-02  | 5.93E-03 | 5.63E-03 | 3.41E-02  | 1.37E-02 | 1.34E-02 | 7.42E-02  | 3.21E-02 | 2.15E-02 |
| ximenoylcarnitine (C26:1)*                                      | 1.45E-02  | 5.88E-03 | 1.42E-02 | 6.91E-03  | 1.37E-02 | 6.14E-01 | 7.63E-02  | 3.17E-02 | 1.68E-02 |
| arachidonoylcarnitine (C20:4)                                   | 2.85E-03  | 5.64E-03 | 6.14E-01 | 6.52E-03  | 1.30E-02 | 6.16E-01 | 2.62E-02  | 3.04E-02 | 3.89E-01 |
| eicosenoylcarnitine (C20:1)*                                    | 5.32E-03  | 5.63E-03 | 3.45E-01 | 6.48E-03  | 1.30E-02 | 6.18E-01 | 2.61E-02  | 3.03E-02 | 3.90E-01 |
| dihomo-linoleoylcarnitine (C20:2)*                              | -8.88E-04 | 5.73E-03 | 8.77E-01 | 2.56E-03  | 1.32E-02 | 8.46E-01 | 2.02E-02  | 3.09E-02 | 5.13E-01 |
| dihomo-linolenoylcarnitine (C20:3n3 or 6)*                      | 4.08E-03  | 5.73E-03 | 4.77E-01 | 9.68E-03  | 1.32E-02 | 4.64E-01 | 7.80E-03  | 3.09E-02 | 8.01E-01 |
| erucoylcarnitine (C22:1)*                                       | 4.65E-03  | 5.39E-03 | 3.89E-01 | 5.82E-03  | 1.24E-02 | 6.39E-01 | 1.50E-02  | 2.91E-02 | 6.07E-01 |
| nervonoylcarnitine (C24:1)*                                     | 3.16E-03  | 5.89E-03 | 5.92E-01 | -1.35E-02 | 1.35E-02 | 3.19E-01 | 2.92E-02  | 3.17E-02 | 3.57E-01 |
| adrenoylcarnitine (C22:4)*                                      | -1.81E-03 | 5.13E-03 | 7.24E-01 | 9.61E-03  | 1.18E-02 | 4.16E-01 | -1.07E-03 | 2.77E-02 | 9.69E-01 |
| glycosyl ceramide (d18:1/20:0, d16:1/22:0)*                     | -1.08E-03 | 5.66E-03 | 8.49E-01 | -9.47E-03 | 1.30E-02 | 4.68E-01 | 1.54E-02  | 3.05E-02 | 6.14E-01 |
| 1-lignoceroyl-2-arachidonoyl-GPC (24:0/20:4)*                   | 2.46E-02  | 5.88E-03 | 3.80E-05 | 4.00E-02  | 1.37E-02 | 3.92E-03 | 1.31E-01  | 3.17E-02 | 4.83E-05 |
| 1-nervonoyl-2-arachidonoyl-GPC (24:1/20:4)*                     | 1.00E-02  | 5.97E-03 | 9.46E-02 | -1.57E-02 | 1.38E-02 | 2.57E-01 | 7.17E-02  | 3.21E-02 | 2.62E-02 |
| N-oxalyl glycine (NOG)                                          | 1.01E-02  | 5.59E-03 | 7.13E-02 | 2.65E-02  | 1.29E-02 | 4.04E-02 | 5.95E-02  | 3.01E-02 | 4.90E-02 |
| N,N,N-trimethyl-5-aminovaleate                                  | -1.95E-03 | 5.85E-03 | 7.39E-01 | 9.11E-03  | 1.35E-02 | 4.99E-01 | -3.27E-02 | 3.15E-02 | 3.00E-01 |
| ethyl alpha-glucopyranoside                                     | -2.10E-04 | 5.05E-03 | 9.67E-01 | -5.68E-02 | 1.11E-02 | 6.19E-07 | -1.22E-03 | 2.72E-02 | 9.64E-01 |
| carotene diol (1)                                               | 2.68E-02  | 5.58E-03 | 2.58E-06 | 3.46E-02  | 1.32E-02 | 9.31E-03 | 1.47E-01  | 3.00E-02 | 1.68E-06 |
| carotene diol (2)                                               | 2.64E-02  | 5.48E-03 | 2.38E-06 | 3.94E-02  | 1.29E-02 | 2.48E-03 | 1.33E-01  | 2.97E-02 | 1.15E-05 |
| carotene diol (3)                                               | 1.45E-02  | 5.91E-03 | 1.49E-02 | 2.10E-02  | 1.37E-02 | 1.27E-01 | 8.13E-02  | 3.18E-02 | 1.13E-02 |
| cortolone glucuronide (1)                                       | -1.86E-02 | 5.91E-03 | 1.84E-03 | -2.76E-02 | 1.37E-02 | 4.56E-02 | -7.23E-02 | 3.21E-02 | 2.51E-02 |
| fluconazole                                                     | 4.03      |          |          |           |          |          |           |          |          |

Supplementary Table 2: Parameter estimates for metabolome-wide association studies for diet-metabolite associations for each of: The Healthy Eating Index-2015 (HEI-15), DASH and AMED diet

|                                                           |           |          |          |           |          |          |           |          |          |
|-----------------------------------------------------------|-----------|----------|----------|-----------|----------|----------|-----------|----------|----------|
| Fibrinopeptide B                                          | 4.68E-03  | 3.94E-03 | 2.36E-01 | 8.59E-03  | 9.07E-03 | 3.45E-01 | 1.93E-02  | 2.13E-02 | 3.66E-01 |
| 1-oleyl-2-linoleoyl-GPC (O-18:1/18:2)*                    | 3.57E-03  | 5.46E-03 | 5.14E-01 | 1.02E-02  | 1.26E-02 | 4.17E-01 | 3.98E-02  | 2.94E-02 | 1.77E-01 |
| 1-palmityl-2-dihomo-linolenoyl-GPC (O-16:0/20:3)*         | -0.08E-03 | 6.14E-03 | 4.09E-01 | -2.95E-02 | 1.41E-02 | 3.65E-02 | -4.12E-02 | 3.31E-02 | 2.14E-01 |
| phosphatidylcholine (O-18:1/20:4, O-16:0/22:5n3)*         | -1.98E-03 | 5.83E-03 | 7.34E-01 | -1.79E-02 | 1.34E-02 | 1.81E-01 | 1.83E-02  | 3.14E-02 | 5.61E-01 |
| 1-palmitoyl-2-pentadecanoyl-GPC (16:0/15:0)*              | -9.28E-03 | 5.60E-03 | 9.87E-02 | -3.93E-03 | 1.30E-02 | 7.62E-01 | -7.56E-02 | 3.00E-02 | 1.22E-02 |
| (N(1) + N(8))-acetyl spermidine                           | 2.16E-03  | 5.71E-03 | 7.05E-01 | 9.04E-03  | 1.31E-02 | 4.92E-01 | 2.72E-02  | 3.07E-02 | 3.76E-01 |
| THC carboxylic acid                                       | 2.09E-03  | 2.78E-03 | 4.52E-01 | -5.75E-03 | 6.39E-03 | 3.69E-01 | 1.28E-02  | 1.50E-02 | 3.95E-01 |
| THC carboxylic acid glucuronide                           | 2.21E-03  | 2.71E-03 | 4.15E-01 | -4.65E-03 | 6.23E-03 | 4.56E-01 | 1.19E-02  | 1.46E-02 | 4.15E-01 |
| 5-dodecenoylcarnitine (C12:1)                             | -2.13E-02 | 5.69E-03 | 2.26E-04 | -5.57E-02 | 1.30E-02 | 2.48E-05 | -7.56E-02 | 3.11E-02 | 1.56E-02 |
| 2-butenoylglycine                                         | -1.05E-03 | 5.14E-03 | 8.38E-01 | 8.83E-03  | 1.18E-02 | 4.56E-01 | 3.14E-02  | 2.76E-02 | 2.57E-01 |
| hydroxy-CMPF*                                             | 1.64E-02  | 5.77E-03 | 4.87E-03 | 1.97E-02  | 1.34E-02 | 1.43E-01 | 1.21E-01  | 3.07E-02 | 9.96E-05 |
| 3-hydroxyoleoylcarnitine                                  | -2.01E-03 | 5.58E-03 | 7.19E-01 | -9.01E-03 | 1.28E-02 | 4.83E-01 | -1.59E-02 | 3.01E-02 | 5.97E-01 |
| 3-hydroxyphenylacetoylglutamine                           | 1.58E-02  | 5.58E-03 | 5.01E-03 | 3.56E-02  | 1.29E-02 | 5.97E-03 | 7.42E-02  | 3.02E-02 | 1.46E-02 |
| trans-2-hexenoylglycine                                   | -1.06E-02 | 5.21E-03 | 4.25E-02 | -1.03E-02 | 1.21E-02 | 3.93E-01 | -2.28E-02 | 2.83E-02 | 4.19E-01 |
| 2-hydroxyarachidate*                                      | -8.87E-03 | 5.83E-03 | 1.29E-01 | -2.94E-02 | 1.34E-02 | 2.89E-02 | -5.94E-02 | 3.14E-02 | 5.95E-02 |
| N-stearoylserine*                                         | -5.29E-03 | 6.03E-03 | 3.81E-01 | -1.66E-02 | 1.39E-02 | 2.32E-01 | 1.42E-02  | 3.26E-02 | 6.63E-01 |
| lyxonate                                                  | 1.15E-02  | 5.60E-03 | 4.07E-02 | 2.94E-03  | 1.30E-02 | 8.21E-01 | 2.52E-02  | 3.04E-02 | 4.07E-01 |
| dodecenedioate (C12:1-DC)*                                | 6.91E-03  | 5.78E-03 | 2.33E-01 | 1.15E-02  | 1.33E-02 | 3.90E-01 | 1.96E-02  | 3.12E-02 | 5.30E-01 |
| hexadecenedioate (C16:1-DC)*                              | -1.05E-02 | 5.86E-03 | 7.46E-02 | -2.33E-02 | 1.35E-02 | 8.49E-02 | -5.80E-02 | 3.16E-02 | 6.75E-02 |
| octadecenedioate (C18:1-DC)                               | 3.98E-03  | 6.07E-03 | 5.12E-01 | 2.20E-02  | 1.39E-02 | 1.14E-01 | 2.26E-02  | 3.27E-02 | 4.90E-01 |
| heptenedioate (C7:1-DC)*                                  | -2.80E-02 | 5.66E-03 | 1.25E-06 | -2.27E-02 | 1.35E-02 | 9.38E-02 | -1.40E-01 | 3.07E-02 | 7.40E-06 |
| octadecadienedioate (C18:2-DC)*                           | 6.64E-03  | 6.32E-03 | 2.94E-01 | 9.49E-03  | 1.46E-02 | 5.16E-01 | 3.71E-02  | 3.41E-02 | 2.78E-01 |
| glucuronide of C12H22O4 (1)*                              | 8.93E-03  | 4.58E-03 | 5.19E-02 | 3.52E-02  | 1.04E-02 | 8.15E-04 | 1.38E-02  | 2.48E-02 | 5.79E-01 |
| glucuronide of C10H18O2 (1)*                              | 2.34E-05  | 4.92E-03 | 9.96E-01 | 1.39E-03  | 1.13E-02 | 9.02E-01 | 1.76E-02  | 2.65E-02 | 5.07E-01 |
| 3-carboxy-4-methyl-5-pentyl-2-furanpropionate (3-CMPFP)** | -6.94E-03 | 5.57E-03 | 2.14E-01 | -4.11E-03 | 1.29E-02 | 7.49E-01 | -5.35E-03 | 3.01E-02 | 8.59E-01 |
| methylmethyl sulfate (1)*                                 | 1.65E-03  | 3.00E-03 | 5.81E-01 | -3.91E-03 | 6.89E-03 | 5.71E-01 | -2.50E-02 | 1.61E-02 | 1.22E-01 |
| methylmethyl sulfate (2)*                                 | -2.75E-03 | 3.61E-03 | 4.46E-01 | -1.47E-02 | 8.27E-03 | 7.68E-02 | 2.12E-03  | 1.95E-02 | 9.13E-01 |
| glucuronide of C10H18O2 (7)*                              | -5.07E-04 | 5.77E-03 | 9.30E-01 | -3.18E-03 | 1.33E-02 | 8.11E-01 | 4.65E-03  | 3.11E-02 | 8.81E-01 |
| glucuronide of C10H18O2 (8)*                              | 2.67E-03  | 4.93E-03 | 5.89E-01 | -4.61E-03 | 1.13E-02 | 6.85E-01 | 1.28E-02  | 2.66E-02 | 6.30E-01 |
| N-acetyl-2-aminooctanoate*                                | 3.09E-03  | 5.86E-03 | 5.98E-01 | 1.53E-02  | 1.35E-02 | 2.58E-01 | 2.49E-02  | 3.16E-02 | 4.31E-01 |
| hydroxyasparagine**                                       | -1.09E-02 | 5.74E-03 | 5.90E-02 | -1.71E-03 | 1.33E-02 | 8.98E-01 | -7.95E-02 | 3.08E-02 | 1.04E-02 |
| perfluorooctanoate (PFOA)                                 | -2.31E-03 | 5.31E-03 | 6.64E-01 | -1.61E-02 | 1.22E-02 | 1.88E-01 | -4.82E-03 | 2.86E-02 | 8.66E-01 |
| pyroglutamylphenylalanine                                 | 1.59E-03  | 5.49E-03 | 7.72E-01 | -4.73E-03 | 1.26E-02 | 7.08E-01 | 9.48E-03  | 2.96E-02 | 7.49E-01 |
| 3-hydroxybutyrylglycine**                                 | -8.93E-03 | 5.45E-03 | 1.02E-01 | -8.91E-03 | 1.26E-02 | 4.79E-01 | 2.66E-03  | 2.95E-02 | 9.28E-01 |
| carboxyibuprofen glucuronide*                             | 2.82E-03  | 2.99E-03 | 3.46E-01 | -5.00E-03 | 6.88E-03 | 4.68E-01 | -2.47E-03 | 1.61E-02 | 8.78E-01 |
| glyco-beta-muricholate**                                  | 1.19E-02  | 5.99E-03 | 4.82E-02 | 2.88E-02  | 1.38E-02 | 3.71E-02 | 1.69E-02  | 3.25E-02 | 6.04E-01 |
| N-methylhydroxyproline**                                  | 1.30E-02  | 5.17E-03 | 1.25E-02 | 2.60E-02  | 1.19E-02 | 2.97E-02 | 4.29E-02  | 2.80E-02 | 1.27E-01 |
| N,N,N-trimethyl-alanylproline betaine (TMAP)              | -2.88E-03 | 5.56E-03 | 6.05E-01 | 2.68E-02  | 1.27E-02 | 3.60E-02 | -4.35E-02 | 2.99E-02 | 1.46E-01 |
| 3-formylindole                                            | 1.45E-02  | 5.40E-03 | 7.68E-03 | 3.58E-02  | 1.24E-02 | 4.19E-03 | 6.44E-02  | 2.92E-02 | 2.84E-02 |
| 1-(1-enyl-oleoyl)-2-docosahexaenoyl-GPC (P-18:1/22:6)*    | 1.90E-02  | 5.21E-03 | 3.07E-04 | 1.05E-02  | 1.23E-02 | 3.91E-01 | 1.38E-01  | 2.75E-02 | 9.68E-07 |
| pyroglutamylalanine*                                      | -3.69E-03 | 5.91E-03 | 5.33E-01 | 7.36E-03  | 1.36E-02 | 5.89E-01 | -4.94E-02 | 3.17E-02 | 1.20E-01 |
| pyroglutamylproline*                                      | -1.39E-02 | 5.98E-03 | 2.06E-02 | -2.58E-02 | 1.38E-02 | 6.31E-02 | -5.39E-02 | 3.24E-02 | 9.71E-02 |
| pyroglutamylleucine*                                      | -3.18E-03 | 6.01E-03 | 5.97E-01 | 7.40E-03  | 1.38E-02 | 5.93E-01 | -6.48E-02 | 3.22E-02 | 4.48E-02 |
| pyroglutamylisoleucine*                                   | -1.52E-04 | 5.73E-03 | 9.79E-01 | 1.72E-03  | 1.32E-02 | 8.96E-01 | -3.26E-02 | 3.08E-02 | 2.91E-01 |
| gamma-glutamylcitrulline*                                 | -9.47E-03 | 5.86E-03 | 1.07E-01 | -1.54E-02 | 1.35E-02 | 2.57E-01 | -3.43E-02 | 3.17E-02 | 2.80E-01 |
| resveratrol disulfate (1)*                                | 1.46E-03  | 3.15E-03 | 6.43E-01 | -1.05E-02 | 7.22E-03 | 1.45E-01 | 7.43E-03  | 1.70E-02 | 6.62E-01 |
| resveratrol disulfate (2)*                                | 1.10E-03  | 3.62E-03 | 7.62E-01 | -2.08E-02 | 8.24E-03 | 1.23E-02 | 4.61E-03  | 1.95E-02 | 8.14E-01 |
| glycine conjugate of C10H12O2*                            | -1.28E-02 | 5.72E-03 | 2.58E-02 | -3.28E-02 | 1.31E-02 | 1.30E-02 | -8.06E-02 | 3.07E-02 | 9.21E-03 |
| glycine conjugate of C10H14O2 (1)*                        | -2.84E-02 | 5.99E-03 | 3.35E-06 | -5.97E-02 | 1.39E-02 | 2.36E-05 | -1.35E-01 | 3.26E-02 | 4.41E-05 |
| glutamine conjugate of C7H12O2*                           | -1.90E-02 | 5.68E-03 | 9.19E-04 | -2.09E-02 | 1.33E-02 | 1.16E-01 | -8.09E-02 | 3.08E-02 | 9.19E-03 |
| glutamine conjugate of C6H10O2 (1)*                       | -1.13E-02 | 5.80E-03 | 5.19E-02 | -8.67E-03 | 1.34E-02 | 5.19E-01 | -3.86E-02 | 3.14E-02 | 2.19E-01 |
| glutamine conjugate of C6H10O2 (2)*                       | -1.25E-02 | 5.59E-03 | 2.65E-02 | -1.84E-02 | 1.29E-02 | 1.56E-01 | -4.37E-02 | 3.03E-02 | 1.51E-01 |
| dihydroferulic acid sulfate                               | 7.82E-03  | 5.07E-03 | 1.24E-01 | 2.75E-02  | 1.16E-02 | 1.86E-02 | 1.73E-02  | 2.74E-02 | 5.29E-01 |
| sphingomyelin (d17:1/14:0, d16:1/15:0)*                   | -2.97E-03 | 5.20E-03 | 5.68E-01 | -2.92E-03 | 1.20E-02 | 8.08E-01 | -2.75E-02 | 2.80E-02 | 3.27E-01 |
| tetradecadienoate (14:2)*                                 | -1.36E-02 | 5.86E-03 | 2.10E-02 | -3.65E-02 | 1.34E-02 | 7.03E-03 | -4.68E-02 | 3.18E-02 | 1.41E-01 |
| 8-methoxykynurenate                                       | -8.98E-03 | 6.03E-03 | 1.38E-01 | -2.10E-02 | 1.39E-02 | 1.32E-01 | -5.82E-02 | 3.25E-02 | 7.38E-02 |
| 3-amino-2-piperidone                                      | 2.18E-03  | 5.54E-03 | 6.94E-01 | 2.45E-02  | 1.27E-02 | 5.38E-02 | 2.12E-02  | 2.98E-02 | 4.78E-01 |
| N,N-dimethylalanine                                       | -8.66E-04 | 5.66E-03 | 8.79E-01 | -3.18E-03 | 1.30E-02 | 8.08E-01 | 1.59E-02  | 3.05E-02 | 6.03E-01 |
| 3-indoleglyoxylic acid                                    | 1.52E-02  | 5.71E-03 | 8.12E-03 | 2.99E-02  | 1.32E-02 | 2.40E-02 | 4.76E-02  | 3.10E-02 | 1.26E-01 |
| ethyl beta-glucopyranoside                                | 1.33E-02  | 5.75E-03 | 2.12E-02 | -3.22E-03 | 1.34E-02 | 8.10E-01 | 6.03E-02  | 3.11E-02 | 5.31E-02 |
| 2-hydroxysebacate                                         | 1.39E-02  | 5.83E-03 | 1.77E-02 | 3.83E-02  | 1.34E-02 | 4.46E-03 | 5.17E-02  | 3.16E-02 | 1.03E-01 |
| enterolactone sulfate                                     | 1.12E-02  | 4.72E-03 | 1.80E-02 | 1.12E-02  | 1.10E-02 | 3.10E-01 | 4.57E-02  | 2.56E-02 | 7.51E-02 |
| ascorbic acid 3-sulfate*                                  | 1.83E-02  | 5.91E-03 | 2.17E-03 | 5.23E-02  | 1.35E-02 | 1.33E-04 | 5.09E-02  | 3.23E-02 | 1.16E-01 |
| 3-hydroxyhippurate sulfate                                | 8.22E-03  | 5.46E-03 | 1.34E-01 | 2.44E-02  | 1.25E-02 | 5.25E-02 | 5.46E-02  | 2.94E-02 | 6.43E-02 |
| 6-bromotryptophan                                         | 1.31E-03  | 5.96E-03 | 8.26E-01 | 9.25E-04  | 1.37E-02 | 9.46E-01 | -3.05E-02 | 3.21E-02 | 3.43E-01 |
| delta-CEHC                                                | -2.44E-02 | 5.96E-03 | 5.61E-05 | -2.20E-02 | 1.41E-02 | 1.20E-01 | -9.24E-02 | 3.26E-02 | 4.97E-03 |
| N6,N6-dimethyllysine                                      | -5.85E-03 | 5.25E-03 | 2.66E-01 | -8.07E-03 | 1.21E-02 | 5.05E-01 | -5.31E-03 | 2.83E-02 | 8.51E-01 |
| 1-carboxyethylphenylalanine                               | -6.61E-03 | 5.44E-03 | 2.25E-01 | 1.18E-02  | 1.25E-02 | 3.46E-01 | -3.90E-02 | 2.93E-02 | 1.85E-01 |
| 1-carboxyethyltyrosine                                    | -6.89E-03 | 5.57E-03 | 2.17E-01 | 6.72E-03  | 1.28E-02 | 6.01E-01 | -3.38E-02 | 3.00E-02 | 2.62E-01 |
| 1-carboxyethylvaline                                      | -3.64E-03 | 5.56E-03 | 5.13E-01 | 1.92E-02  | 1.28E-02 | 1.34E-01 | -1.49E-02 | 3.00E-02 | 6.19E-01 |
| 1-carboxyethylleucine                                     | -5.59E-03 | 5.40E-03 | 3.01E-01 | -5.01E-03 | 1.24E-02 | 6.88E-01 | -3.32E-02 | 2.91E-02 | 2.55E-01 |
| 1-carboxyethylisoleucine                                  | -5.58E-03 | 5.41E-03 | 3.03E-01 | 1.19E-02  | 1.24E-02 | 3.38E-01 | -2.58E-02 | 2.92E-02 | 3.78E-01 |
| dodecadienoate (12:2)*                                    | -3.90E-03 | 5.81E-03 | 5.03E-01 | -1.48E-02 | 1.34E-02 | 2.70E-01 | -1.40E-02 | 3.13E-02 | 6.55E-01 |
| indoleacetoylcarnitine*                                   | -6.28E-03 | 5.29E-03 | 2.36E-01 | -3.75E-02 | 1.20E-02 | 1.97E-03 | 2.18E-02  | 2.85E-02 | 4.46E-01 |
| gamma-CEHC sulfate                                        | -4.06E-03 | 4.89E-03 | 4.07E-01 | 1.06E-02  | 1.12E-02 | 3.48E-01 | -3.77E-02 | 2.63E-02 | 1.52E-01 |
| delta-CEHC glucuronide                                    | -1.73E-02 | 5.68E-03 | 2.52E-03 | -5.78E-03 | 1.33E-02 | 6.64E-01 | -6.70E-02 | 3.08E-02 | 3.05E-02 |
| N-acetyl-isoptureanine                                    | 9.26E-03  | 5.95E-03 | 1.21E-01 | 9.61E-03  | 1.37E-02 | 4.85E-01 | 5.86E-02  | 3.20E-02 | 6.84E-02 |
| glucuronide of piperine metabolite C17H21NO3 (3)*         | 5.86E-03  | 5.69E-03 | 3.04E-01 | -1.88E-02 | 1.31E-02 | 1.52E-01 | 4.05E-02  | 3.06E-02 | 1.87E-01 |
| glucuronide of piperine metabolite C17H21NO3 (4)*         | 3.99E-03  | 5.68E-03 | 4.82E-01 | -2.19E-02 | 1.30E-02 | 9.32E-02 | 4.27E-02  | 3.05E-02 | 1.63E-01 |
| glucuronide of piperine metabolite C17H21NO3 (5)*         | 4.01E-03  | 5.79E-03 | 4.89E-01 | -2.63E-02 | 1.32E-02 | 4.77E-02 | 3.80E-02  | 3.11E-02 | 2.23E-01 |
| sulfate of piperine metabolite C16H19NO3 (2)*             | 4.53E-03  | 5.89E-03 | 4.43E-01 | -2.90E-02 | 1.35E-02 | 3.22E-02 | 4.17E-02  | 3.17E-02 | 1.89E-01 |
| sulfate of piperine metabolite C16H19NO3 (3)*             | 4.25E-03  | 5.83E-03 | 4.67E-01 | -2.64E-02 | 1.33E-02 | 4.86E-02 | 3.94E-02  | 3.14E-02 | 2.10E-01 |
| sulfate of piperine metabolite C18H21NO3 (1)*             | 5.14E-04  | 5.66E-03 | 9.28E-01 | -2.66E-02 | 1.29E-02 | 4.03E-02 | 2.15E-02  | 3.05E-02 | 4.82E-01 |
| 5-hydroxyindole glucuronide                               | 9.57E-04  | 5.75E-03 | 8.68E-01 | 5.73E-03  | 1.32E-02 | 6.65E-01 | 6.61E-03  | 3.10E-02 | 8.31E-01 |

Supplementary Table 2: Parameter estimates for metabolome-wide association studies for diet-metabolite associations for each of: The Healthy Eating Index-2015 (HEI-15), DASH and AMED diet

|                                                                     |           |          |          |           |          |          |           |          |          |
|---------------------------------------------------------------------|-----------|----------|----------|-----------|----------|----------|-----------|----------|----------|
| N-acetylhomocitrulline                                              | 1.15E-03  | 4.61E-03 | 8.03E-01 | -4.01E-03 | 1.06E-02 | 7.06E-01 | -1.52E-02 | 2.49E-02 | 5.40E-01 |
| 2-naphthol sulfate                                                  | -4.71E-03 | 5.33E-03 | 3.78E-01 | -1.83E-02 | 1.22E-02 | 1.36E-01 | -3.28E-02 | 2.87E-02 | 2.54E-01 |
| (2,4 or 2,5)-dimethylphenol sulfate                                 | -6.03E-03 | 4.72E-03 | 2.03E-01 | -3.26E-02 | 1.07E-02 | 2.61E-03 | -2.33E-03 | 2.55E-02 | 9.27E-01 |
| 4-ethylcatechol sulfate                                             | 1.19E-02  | 5.81E-03 | 4.14E-02 | 2.99E-02  | 1.33E-02 | 2.59E-02 | 3.67E-02  | 3.15E-02 | 2.44E-01 |
| 11beta-hydroxyandrosterone glucuronide                              | -5.66E-03 | 6.03E-03 | 3.49E-01 | 6.21E-03  | 1.39E-02 | 6.56E-01 | -5.42E-02 | 3.24E-02 | 9.52E-02 |
| 11beta-hydroxyetiocolanone glucuronide*                             | 5.85E-03  | 5.73E-03 | 3.09E-01 | 6.50E-03  | 1.32E-02 | 6.23E-01 | -2.09E-02 | 3.09E-02 | 5.01E-01 |
| N2-acetyl,N6-methyllysine                                           | -6.99E-03 | 5.73E-03 | 2.24E-01 | -2.21E-02 | 1.32E-02 | 9.49E-02 | 4.12E-04  | 3.10E-02 | 9.89E-01 |
| cholic acid glucuronide                                             | 6.21E-03  | 5.25E-03 | 2.38E-01 | 1.27E-02  | 1.21E-02 | 2.96E-01 | 4.44E-02  | 2.83E-02 | 1.17E-01 |
| deoxycholic acid glucuronide                                        | 2.03E-04  | 6.07E-03 | 9.73E-01 | -1.18E-02 | 1.40E-02 | 4.00E-01 | 4.11E-02  | 3.26E-02 | 2.09E-01 |
| 4-allylcatechol sulfate                                             | 1.34E-02  | 6.18E-03 | 3.08E-02 | 2.86E-02  | 1.43E-02 | 4.57E-02 | 7.01E-02  | 3.33E-02 | 3.64E-02 |
| 2-hydroxyfluorene sulfate                                           | -1.79E-03 | 4.07E-03 | 6.60E-01 | -1.61E-02 | 9.32E-03 | 8.59E-02 | 9.41E-04  | 2.19E-02 | 9.66E-01 |
| vanillate glucuronide                                               | 2.87E-03  | 2.99E-03 | 3.39E-01 | 1.18E-02  | 6.86E-03 | 8.52E-02 | 6.29E-04  | 1.61E-02 | 9.69E-01 |
| 4-methylhexanoylglutamine                                           | -2.17E-02 | 5.62E-03 | 1.40E-04 | -4.45E-02 | 1.30E-02 | 7.21E-04 | -1.30E-01 | 3.01E-02 | 2.26E-05 |
| Benazeprilat                                                        | 2.10E-03  | 1.40E-03 | 1.35E-01 | 2.24E-03  | 3.23E-03 | 4.89E-01 | -9.35E-03 | 7.56E-03 | 2.17E-01 |
| 1-nonadecenoyl-GPC (19:1)*                                          | 1.18E-02  | 5.37E-03 | 2.86E-02 | 1.89E-02  | 1.24E-02 | 1.28E-01 | 3.43E-02  | 2.91E-02 | 2.41E-01 |
| desmethycitalopram*                                                 | -5.63E-03 | 2.84E-03 | 4.83E-02 | -2.28E-03 | 6.58E-03 | 7.29E-01 | -4.31E-03 | 1.54E-02 | 7.80E-01 |
| citalopram propionate*                                              | -3.06E-03 | 2.69E-03 | 2.57E-01 | -1.60E-03 | 6.21E-03 | 7.97E-01 | -4.21E-05 | 1.45E-02 | 9.98E-01 |
| 4-hydroxy duloxetine glucuronide*                                   | 6.60E-20  | 1.01E-19 | 5.12E-01 | 5.38E-19  | 2.29E-19 | 1.98E-02 | 3.95E-19  | 5.42E-19 | 4.67E-01 |
| 5-hydroxy-6-methoxy duloxetine sulfate*                             | -4.34E-04 | 1.07E-03 | 6.84E-01 | -5.44E-04 | 2.45E-03 | 8.25E-01 | -1.97E-03 | 5.74E-03 | 7.32E-01 |
| N-desalkylquetiapine*                                               | 6.98E-04  | 1.03E-03 | 4.99E-01 | -1.28E-03 | 2.38E-03 | 5.90E-01 | -6.11E-03 | 5.55E-03 | 2.72E-01 |
| ranitidine N-oxide*                                                 | -1.11E-03 | 1.04E-03 | 2.87E-01 | -6.06E-04 | 2.41E-03 | 8.02E-01 | -3.83E-04 | 5.64E-03 | 9.46E-01 |
| 7-hydroxywarfarin                                                   | 7.63E-04  | 1.65E-03 | 6.45E-01 | 3.72E-03  | 3.80E-03 | 3.29E-01 | -4.44E-03 | 8.91E-03 | 6.19E-01 |
| glycoursodeoxycholic acid sulfate (1)                               | -1.71E-02 | 5.29E-03 | 1.36E-03 | -3.76E-02 | 1.22E-02 | 2.26E-03 | -8.36E-02 | 2.86E-02 | 3.74E-03 |
| dihydrocaffeate sulfate (2)                                         | 2.03E-02  | 5.77E-03 | 4.95E-04 | 4.17E-02  | 1.33E-02 | 1.95E-03 | 9.78E-02  | 3.12E-02 | 1.93E-03 |
| lithocholate sulfate (1)                                            | 5.96E-03  | 5.97E-03 | 3.19E-01 | 2.28E-02  | 1.37E-02 | 9.69E-02 | -6.06E-02 | 3.20E-02 | 5.95E-02 |
| 3-hydroxyhexanoylcarnitine (1)                                      | -4.15E-03 | 5.65E-03 | 4.64E-01 | 7.07E-03  | 1.30E-02 | 5.87E-01 | -7.70E-02 | 3.05E-02 | 8.01E-01 |
| 3-(methylthio)acetaminophen sulfate*                                | 4.46E-03  | 4.30E-03 | 3.00E-01 | 1.90E-02  | 9.85E-03 | 5.48E-02 | 2.45E-02  | 2.32E-02 | 2.91E-01 |
| 2-ketocaprylate                                                     | 1.51E-02  | 5.74E-03 | 8.93E-03 | 3.36E-02  | 1.32E-02 | 1.15E-02 | 4.41E-02  | 3.12E-02 | 1.59E-01 |
| 2,6-dihydroxybenzoic acid                                           | 2.24E-02  | 5.63E-03 | 8.61E-05 | 6.97E-02  | 1.26E-02 | 8.04E-08 | 9.45E-02  | 3.07E-02 | 2.25E-03 |
| tetrahydrocortisol sulfate (1)                                      | -1.09E-02 | 4.94E-03 | 2.86E-02 | -9.84E-03 | 1.14E-02 | 3.90E-01 | -7.43E-02 | 2.65E-02 | 5.31E-03 |
| 3-ethylcatechol sulfate (1)                                         | -6.25E-03 | 5.47E-03 | 2.54E-01 | -3.55E-02 | 1.24E-02 | 4.60E-03 | -1.50E-02 | 2.95E-02 | 6.12E-01 |
| 3-ethylcatechol sulfate (2)                                         | -1.46E-03 | 4.14E-03 | 7.24E-01 | -2.01E-03 | 9.54E-03 | 8.33E-01 | -3.72E-03 | 2.23E-02 | 8.68E-01 |
| 4-acetylcatechol sulfate (1)                                        | 1.54E-02  | 5.50E-03 | 5.64E-03 | 4.22E-02  | 1.26E-02 | 9.12E-04 | 6.51E-02  | 2.98E-02 | 2.97E-02 |
| 1-(14 or 15-methyl)palmitoyl-GPC (a17:0 or i17:0)*                  | -5.65E-03 | 5.72E-03 | 3.25E-01 | -3.53E-03 | 1.32E-02 | 7.89E-01 | -6.27E-02 | 3.07E-02 | 4.19E-02 |
| montelukast                                                         | -1.46E-03 | 1.85E-03 | 4.30E-01 | 2.55E-03  | 1.47E-03 | 5.51E-01 | -1.42E-02 | 9.96E-03 | 1.55E-01 |
| 2,3-dihydroxy-5-methylthio-4-pentenoate (DMTPA)*                    | -1.09E-02 | 5.51E-03 | 4.87E-02 | 8.05E-03  | 1.28E-02 | 5.28E-01 | -8.21E-02 | 2.95E-02 | 5.71E-03 |
| Fibrinopeptide A (3-16)**                                           | 5.19E-03  | 3.85E-03 | 1.79E-01 | 1.18E-02  | 8.87E-03 | 1.83E-01 | 1.44E-02  | 2.08E-02 | 4.88E-01 |
| meloxicam                                                           | -2.61E-03 | 1.86E-03 | 1.61E-01 | 1.10E-03  | 4.29E-03 | 7.98E-01 | -6.50E-03 | 1.00E-02 | 5.18E-01 |
| Fibrinopeptide B (1-13)**                                           | 5.17E-03  | 4.04E-03 | 2.01E-01 | 1.39E-02  | 9.28E-03 | 1.34E-01 | 7.28E-03  | 2.18E-02 | 7.39E-01 |
| losartan                                                            | -5.11E-03 | 2.86E-03 | 7.53E-02 | -5.44E-03 | 6.62E-03 | 4.12E-01 | -1.60E-02 | 1.55E-02 | 3.01E-01 |
| cyclobenzaprine                                                     | -1.86E-03 | 2.15E-03 | 3.88E-01 | -6.16E-03 | 4.94E-03 | 2.13E-01 | -3.92E-03 | 1.16E-02 | 7.35E-01 |
| emtricitabine                                                       | -7.81E-05 | 1.66E-03 | 9.63E-01 | -4.13E-03 | 3.82E-03 | 2.81E-01 | 4.68E-03  | 8.96E-03 | 6.01E-01 |
| darunavir                                                           | -3.29E-04 | 1.42E-03 | 8.16E-01 | -3.61E-03 | 3.25E-03 | 2.68E-01 | 1.01E-03  | 7.63E-03 | 8.95E-01 |
| 5-hydroxy-2-methylpyridine sulfate                                  | 5.25E-04  | 4.83E-03 | 9.14E-01 | -2.95E-03 | 1.11E-02 | 7.91E-01 | -3.64E-02 | 2.60E-02 | 1.61E-01 |
| 3-hydroxy-2-methylpyridine sulfate                                  | 8.98E-03  | 5.26E-03 | 8.89E-02 | 8.48E-03  | 1.22E-02 | 4.86E-01 | 5.45E-02  | 2.83E-02 | 5.52E-02 |
| hydroxypalmitoyl sphingomyelin (d18:1/16:0(OH))**                   | 2.90E-03  | 5.92E-03 | 6.24E-01 | 9.65E-03  | 1.36E-02 | 4.79E-01 | 1.44E-02  | 3.19E-02 | 6.53E-01 |
| tamoxifen                                                           | 6.60E-20  | 1.01E-19 | 5.12E-01 | 5.38E-19  | 2.29E-19 | 1.98E-02 | 3.95E-19  | 5.42E-19 | 4.67E-01 |
| taurochenodeoxycholic acid 3-sulfate                                | -6.67E-03 | 5.41E-03 | 2.19E-01 | -1.57E-02 | 1.25E-02 | 2.09E-01 | -3.93E-02 | 2.92E-02 | 1.79E-01 |
| tetradecadienedioate (C14:2-DC)*                                    | -4.72E-03 | 5.69E-03 | 4.08E-01 | -1.62E-02 | 1.31E-02 | 2.18E-01 | -4.26E-02 | 3.06E-02 | 1.65E-01 |
| pregnenetriol sulfate*                                              | -1.16E-02 | 5.42E-03 | 3.30E-02 | -2.38E-02 | 1.25E-02 | 5.81E-02 | -8.73E-02 | 2.90E-02 | 2.82E-03 |
| pregnenetriol disulfate*                                            | -1.73E-02 | 5.46E-03 | 1.70E-03 | -1.78E-02 | 1.26E-02 | 2.91E-03 | -9.69E-02 | 2.94E-02 | 1.10E-03 |
| eicosenedioate (C20:1-DC)*                                          | -2.08E-02 | 5.90E-03 | 5.01E-04 | -3.65E-02 | 1.37E-02 | 8.22E-03 | -9.14E-02 | 3.20E-02 | 4.66E-03 |
| hydroxy-N6,N6,N6-trimethyllysine*                                   | -1.48E-02 | 5.34E-03 | 5.75E-03 | -9.73E-03 | 1.24E-02 | 4.35E-01 | -6.33E-02 | 2.89E-02 | 2.93E-02 |
| undecenoylcarnitine (C11:1)                                         | -1.24E-02 | 5.42E-03 | 2.32E-02 | -1.51E-02 | 1.25E-02 | 2.31E-01 | -7.30E-02 | 2.91E-02 | 1.28E-02 |
| 3-decenoylcarnitine                                                 | -1.42E-03 | 5.85E-03 | 8.08E-01 | 6.26E-03  | 1.35E-02 | 6.42E-01 | -2.07E-02 | 3.15E-02 | 5.13E-01 |
| 3-hydroxydecanoylcarnitine                                          | -1.29E-03 | 5.68E-03 | 8.21E-01 | 1.01E-02  | 1.31E-02 | 4.40E-01 | -4.13E-03 | 3.06E-02 | 8.93E-01 |
| palmitoyl-sphingosine-phosphoethanolamine (d18:1/16:0)              | -6.54E-03 | 5.88E-03 | 2.68E-01 | -1.52E-02 | 1.35E-02 | 2.61E-01 | 5.62E-03  | 3.18E-02 | 8.60E-01 |
| picolinoylglycine                                                   | 3.10E-03  | 5.64E-03 | 5.84E-01 | 2.65E-02  | 1.29E-02 | 4.08E-02 | -3.63E-03 | 3.04E-02 | 9.05E-01 |
| 4-vinylcatechol sulfate                                             | 1.21E-02  | 5.30E-03 | 2.35E-02 | 1.37E-02  | 1.23E-02 | 2.64E-01 | 4.55E-02  | 2.87E-02 | 1.14E-01 |
| succinyltaurine                                                     | 1.47E-03  | 6.06E-03 | 8.08E-01 | 2.33E-02  | 1.39E-02 | 9.47E-02 | -1.28E-02 | 3.26E-02 | 6.95E-01 |
| phenylalanylhydroxyproline*                                         | -1.10E-02 | 5.83E-03 | 6.12E-02 | -1.06E-02 | 1.35E-02 | 4.32E-01 | 4.32E-03  | 3.16E-02 | 8.91E-01 |
| ginkgolic acid C15:1                                                | -6.04E-05 | 2.93E-03 | 9.84E-01 | 1.93E-03  | 6.75E-03 | 7.75E-01 | -1.16E-02 | 1.58E-02 | 4.64E-01 |
| (15:3)-anacardic acid                                               | 3.40E-03  | 3.88E-03 | 3.81E-01 | 6.23E-03  | 8.93E-03 | 4.86E-01 | 3.95E-03  | 2.09E-02 | 8.50E-01 |
| ginkgolic acid C17:1                                                | 2.15E-03  | 2.46E-03 | 3.83E-01 | 7.72E-03  | 5.65E-03 | 1.73E-01 | 6.48E-04  | 1.33E-02 | 9.61E-01 |
| 3,5-dichloro-2,6-dihydroxybenzoic acid                              | -2.81E-02 | 5.86E-03 | 2.70E-06 | -3.77E-02 | 1.38E-02 | 6.88E-03 | -1.40E-01 | 3.18E-02 | 1.44E-05 |
| metabolonic lactone sulfate                                         | -1.42E-02 | 5.60E-03 | 1.18E-02 | -3.14E-02 | 1.29E-02 | 1.58E-02 | -8.41E-02 | 3.01E-02 | 5.62E-03 |
| vanillic acid glycine                                               | 1.00E-02  | 5.43E-03 | 6.51E-02 | 3.96E-02  | 1.23E-02 | 1.47E-03 | 5.84E-02  | 2.92E-02 | 4.65E-02 |
| 2-hydroxy-4-(methylthio)butanoic acid                               | -1.36E-02 | 5.17E-03 | 9.12E-03 | -2.29E-02 | 1.20E-02 | 5.71E-02 | -1.13E-02 | 2.82E-02 | 6.88E-01 |
| branched chain 14:0 dicarboxylic acid**                             | 3.62E-02  | 5.35E-03 | 7.45E-11 | 6.66E-02  | 1.27E-02 | 2.99E-07 | 1.36E-01  | 3.00E-02 | 8.37E-06 |
| (2-butoxyethoxy)acetic acid                                         | 8.60E-04  | 4.65E-03 | 8.53E-01 | 1.01E-02  | 1.07E-02 | 3.45E-01 | -2.78E-02 | 2.50E-02 | 2.67E-01 |
| pentose acid*                                                       | 2.69E-02  | 5.06E-03 | 2.17E-07 | 3.04E-02  | 1.21E-02 | 1.24E-02 | 1.05E-01  | 2.79E-02 | 1.94E-04 |
| N-succinyl-phenylalanine                                            | 3.08E-03  | 5.40E-03 | 5.69E-01 | -6.19E-04 | 1.24E-02 | 9.60E-01 | -9.33E-03 | 2.91E-02 | 7.49E-01 |
| 1-methyl-5-imidazolelactate                                         | -5.23E-03 | 6.02E-03 | 3.86E-01 | -1.83E-02 | 1.38E-02 | 1.88E-01 | -2.60E-02 | 3.25E-02 | 4.24E-01 |
| (2 or 3)-decanoate (10:1n7 or n8)                                   | -6.85E-03 | 5.85E-03 | 2.43E-01 | -1.96E-02 | 1.35E-02 | 1.46E-01 | -2.69E-02 | 3.16E-02 | 3.95E-01 |
| chenodeoxycholic acid sulfate (1)                                   | -5.12E-03 | 4.70E-03 | 2.77E-01 | -8.91E-03 | 1.08E-02 | 4.12E-01 | -1.68E-02 | 2.54E-02 | 5.08E-01 |
| branched-chain, straight-chain, or cyclopropyl 10:1 fatty acid (1)* | -1.64E-02 | 5.77E-03 | 4.73E-03 | -4.75E-02 | 1.32E-02 | 3.69E-04 | -7.45E-02 | 3.12E-02 | 1.78E-02 |
| branched-chain, straight-chain, or cyclopropyl 10:1 fatty acid (2)* | -1.63E-02 | 5.66E-03 | 4.17E-03 | -3.95E-02 | 1.30E-02 | 2.63E-03 | -7.54E-02 | 3.06E-02 | 1.44E-02 |
| carnitine of C10H14O2 (5)*                                          | -1.17E-02 | 5.96E-03 | 5.13E-02 | -2.73E-03 | 1.38E-02 | 8.43E-01 | -4.34E-02 | 3.22E-02 | 1.79E-01 |
| 3-bromo-5-chloro-2,6-dihydroxybenzoic acid*                         | -2.42E-02 | 5.95E-03 | 6.31E-05 | -4.78E-02 | 1.38E-02 | 6.21E-04 | -1.64E-01 | 3.15E-02 | 4.01E-07 |
| branched-chain, straight-chain, or cyclopropyl 12:1 fatty acid*     | -1.39E-02 | 5.76E-03 | 1.61E-02 | -3.31E-02 | 1.33E-02 | 1.30E-02 | -6.17E-02 | 3.12E-02 | 4.88E-02 |
| decadienedioic acid (C10:2-DC)**                                    | -1.07E-02 | 5.84E-03 | 6.86E-02 | -2.76E-02 | 1.34E-02 | 4.06E-02 | -7.18E-02 | 3.14E-02 | 2.28E-02 |
| deoxycholic acid 12-sulfate*                                        | -5.61E-03 | 5.75E-03 | 3.30E-01 | -9.84E-03 | 1.33E-02 | 4.58E-01 | -4.34E-02 | 3.09E-02 | 1.62E-01 |
| GlcNAc sulfate conjugate of C21H34O2 steroid**                      | -1.02E-03 | 5.61E-03 | 8.56E-01 | -1.19E-02 | 1.29E-02 | 3.57E-01 | -2.98E-02 | 3.02E-02 | 3.23E-01 |
| cis-3,4-methyleneheptanoate                                         | -1.81E-02 | 5.95E-03 | 2.64E-03 | -1.35E-02 | 1.39E-02 | 3.33E-01 | -6.09E-02 | 3.24E-02 | 6.11E-02 |

Supplementary Table 2: Parameter estimates for metabolome-wide association studies for diet-metabolite associations for each of: The Healthy Eating Index-2015 (HEI-15), DASH and AMED diet

|                                                 |           |          |          |           |          |          |           |          |          |
|-------------------------------------------------|-----------|----------|----------|-----------|----------|----------|-----------|----------|----------|
| cis-3,4-methyleneheptanoylcarnitine             | -2.23E-02 | 5.93E-03 | 2.12E-04 | -1.98E-02 | 1.39E-02 | 1.57E-01 | -7.24E-02 | 3.25E-02 | 2.65E-02 |
| N-acetyl-2-aminoadipate                         | -1.68E-02 | 5.78E-03 | 3.89E-03 | -2.56E-02 | 1.34E-02 | 5.72E-02 | -6.15E-02 | 3.14E-02 | 5.13E-02 |
| De(carboxymethoxy) cetirizine acetic acid       | 3.71E-03  | 3.44E-03 | 2.81E-01 | 6.35E-03  | 7.92E-03 | 4.24E-01 | 6.81E-04  | 1.86E-02 | 9.71E-01 |
| 4-chlorobenzoic acid                            | -5.10E-03 | 5.88E-03 | 3.86E-01 | -9.82E-03 | 1.35E-02 | 4.69E-01 | 1.07E-04  | 3.17E-02 | 9.97E-01 |
| torasemide                                      | -7.73E-04 | 1.06E-03 | 4.65E-01 | -3.12E-03 | 2.43E-03 | 2.00E-01 | -1.05E-02 | 5.67E-03 | 6.53E-02 |
| 2-methoxyhydroquinone sulfate (1)               | -3.95E-03 | 5.53E-03 | 4.76E-01 | 4.72E-03  | 1.27E-02 | 7.11E-01 | 8.11E-03  | 2.98E-02 | 7.86E-01 |
| diazepam                                        | 4.77E-04  | 1.06E-03 | 6.52E-01 | 2.68E-03  | 2.43E-03 | 2.71E-01 | 6.96E-03  | 5.68E-03 | 2.21E-01 |
| temazepam                                       | 2.89E-03  | 1.65E-03 | 8.17E-02 | 3.97E-03  | 3.82E-03 | 3.00E-01 | 2.19E-02  | 8.87E-03 | 1.43E-02 |
| 2,4-di-tert-butylphenol                         | -7.09E-03 | 6.18E-03 | 2.52E-01 | -2.88E-02 | 1.41E-02 | 4.29E-02 | -2.34E-02 | 3.33E-02 | 4.84E-01 |
| 3-hydroxyoctanoylcarnitine (1)                  | 1.86E-03  | 5.68E-03 | 7.44E-01 | 9.57E-03  | 1.31E-02 | 4.65E-01 | -4.25E-03 | 3.06E-02 | 8.90E-01 |
| 3-hydroxyoctanoylcarnitine (2)                  | 2.99E-03  | 5.64E-03 | 5.96E-01 | 5.07E-03  | 1.30E-02 | 6.96E-01 | 1.17E-02  | 3.04E-02 | 7.00E-01 |
| cis-3,4-methyleneheptanoylglycine               | -2.10E-02 | 5.89E-03 | 4.20E-04 | -3.00E-02 | 1.37E-02 | 3.01E-02 | -8.91E-02 | 3.20E-02 | 5.74E-03 |
| bilirubin degradation product, C16H18N2O5 (1)** | -5.21E-03 | 5.75E-03 | 3.65E-01 | -2.25E-02 | 1.32E-02 | 8.89E-02 | -7.20E-03 | 3.10E-02 | 8.17E-01 |
| bilirubin degradation product, C16H18N2O5 (2)** | -3.64E-03 | 5.76E-03 | 5.27E-01 | -1.82E-02 | 1.32E-02 | 1.70E-01 | 9.71E-03  | 3.10E-02 | 7.55E-01 |
| bilirubin degradation product, C17H18N2O4 (1)** | -6.26E-03 | 5.84E-03 | 2.85E-01 | -2.13E-02 | 1.34E-02 | 1.13E-01 | -6.68E-04 | 3.16E-02 | 9.83E-01 |
| bilirubin degradation product, C17H18N2O4 (2)** | -5.49E-03 | 5.77E-03 | 3.42E-01 | -2.10E-02 | 1.33E-02 | 1.14E-01 | 6.25E-04  | 3.12E-02 | 9.84E-01 |
| bilirubin degradation product, C17H18N2O4 (3)** | -6.60E-03 | 5.82E-03 | 2.57E-01 | -2.32E-02 | 1.33E-02 | 8.38E-02 | -7.10E-04 | 3.14E-02 | 9.82E-01 |
| bilirubin degradation product, C17H20N2O5 (1)** | -7.53E-03 | 5.94E-03 | 2.05E-01 | -2.41E-02 | 1.36E-02 | 7.84E-02 | -9.55E-03 | 3.21E-02 | 7.66E-01 |
| bilirubin degradation product, C17H20N2O5 (2)** | -7.76E-03 | 5.94E-03 | 1.93E-01 | -2.47E-02 | 1.36E-02 | 7.07E-02 | -2.80E-03 | 3.21E-02 | 9.30E-01 |
| tetrahydrocortisol glucuronide                  | -4.92E-03 | 5.66E-03 | 3.86E-01 | -2.75E-02 | 1.29E-02 | 3.48E-02 | -4.17E-02 | 3.05E-02 | 1.72E-01 |
| bilirubin degradation product, C16H18N2O5 (3)** | -5.18E-03 | 5.71E-03 | 3.66E-01 | -1.55E-02 | 1.31E-02 | 2.39E-01 | 1.21E-02  | 3.08E-02 | 6.95E-01 |
| bilirubin degradation product, C16H18N2O5 (4)** | -6.39E-03 | 5.68E-03 | 2.62E-01 | -1.87E-02 | 1.31E-02 | 1.54E-01 | 7.17E-03  | 3.07E-02 | 8.16E-01 |
| N,N-dimethyl-pro-pro                            | -1.29E-02 | 5.76E-03 | 2.54E-02 | -2.32E-03 | 1.34E-02 | 8.63E-01 | -7.44E-02 | 3.10E-02 | 1.70E-02 |
| oxindolylalanine                                | 1.85E-02  | 5.85E-03 | 1.69E-03 | 4.40E-02  | 1.35E-02 | 1.20E-03 | 7.23E-02  | 3.18E-02 | 2.37E-02 |
| tetrahydrocortisone glucuronide (5)             | -4.38E-03 | 5.46E-03 | 4.22E-01 | -1.13E-02 | 1.26E-02 | 3.68E-01 | -5.59E-02 | 2.92E-02 | 5.68E-02 |
| perfluorohexanesulfonic acid                    | 5.00E-03  | 5.15E-03 | 3.33E-01 | 1.38E-03  | 1.19E-02 | 9.07E-01 | 1.13E-03  | 2.78E-02 | 9.68E-01 |
| trans-4-hydroxyproline                          | -1.52E-02 | 5.66E-03 | 7.54E-03 | -3.05E-02 | 1.31E-02 | 2.06E-02 | -6.63E-02 | 3.07E-02 | 3.14E-02 |
| allantoin                                       | 1.07E-02  | 5.82E-03 | 6.81E-02 | 3.93E-02  | 1.33E-02 | 3.31E-03 | 4.93E-02  | 3.14E-02 | 1.18E-01 |
| xanthine                                        | -2.02E-02 | 5.84E-03 | 6.17E-04 | -1.05E-02 | 1.37E-02 | 4.44E-01 | -9.29E-02 | 3.16E-02 | 3.61E-03 |
| 5-oxoproline                                    | 2.40E-03  | 5.80E-03 | 6.79E-01 | 1.18E-02  | 1.33E-02 | 3.78E-01 | 5.04E-03  | 3.12E-02 | 8.72E-01 |
| sarcosine                                       | -6.30E-03 | 6.13E-03 | 3.05E-01 | -1.61E-02 | 1.41E-02 | 2.56E-01 | -4.97E-02 | 3.30E-02 | 1.33E-01 |
| pantothenate                                    | 1.20E-02  | 5.50E-03 | 3.00E-02 | 3.37E-02  | 1.26E-02 | 7.87E-03 | 2.73E-02  | 2.98E-02 | 3.61E-01 |
| pipecolate                                      | 1.36E-02  | 6.01E-03 | 2.43E-02 | 1.55E-02  | 1.39E-02 | 2.67E-01 | 8.33E-02  | 3.23E-02 | 1.04E-02 |
| phosphoethanolamine                             | 3.75E-03  | 6.26E-03 | 5.49E-01 | 1.88E-02  | 1.44E-02 | 1.93E-01 | 3.53E-02  | 3.37E-02 | 2.96E-01 |
| glycerate                                       | 2.87E-02  | 5.38E-03 | 1.94E-07 | 6.32E-02  | 1.24E-02 | 6.81E-07 | 1.18E-01  | 2.96E-02 | 8.50E-05 |
| 3-ureidopropionate                              | 1.66E-02  | 5.39E-03 | 2.27E-03 | 2.60E-02  | 1.25E-02 | 3.86E-02 | 7.26E-02  | 2.92E-02 | 1.36E-02 |
| 5-KETE                                          | -3.87E-04 | 2.72E-03 | 8.87E-01 | -2.20E-03 | 6.26E-03 | 7.25E-01 | 2.75E-03  | 1.47E-02 | 8.51E-01 |
| N-acetylucine                                   | -9.71E-03 | 5.43E-03 | 7.49E-02 | -1.34E-02 | 1.25E-02 | 2.87E-01 | -1.90E-02 | 2.94E-02 | 5.19E-01 |
| N-acetylmethionine                              | -1.68E-02 | 5.79E-03 | 4.08E-03 | 5.77E-03  | 1.35E-02 | 6.70E-01 | -8.64E-02 | 3.13E-02 | 6.10E-03 |
| N-acetylvaline                                  | 8.00E-05  | 5.86E-03 | 9.89E-01 | 1.31E-02  | 1.35E-02 | 3.33E-01 | -8.12E-03 | 3.16E-02 | 7.97E-01 |
| erucate (22:1n9)                                | 9.25E-04  | 5.94E-03 | 8.76E-01 | -1.54E-02 | 1.36E-02 | 2.60E-01 | 2.45E-03  | 3.20E-02 | 9.39E-01 |
| bilirubin (Z,Z)                                 | 1.97E-03  | 5.72E-03 | 7.31E-01 | -7.91E-03 | 1.32E-02 | 5.48E-01 | 3.43E-02  | 3.08E-02 | 2.67E-01 |
| thyroxine                                       | -2.44E-03 | 5.90E-03 | 6.80E-01 | 1.38E-02  | 1.36E-02 | 3.08E-01 | -3.01E-02 | 3.18E-02 | 3.44E-01 |
| gamma-glutamyltyrosine                          | -4.23E-03 | 5.74E-03 | 4.62E-01 | 2.81E-03  | 1.32E-02 | 8.32E-01 | -2.83E-02 | 3.09E-02 | 3.60E-01 |
| alpha-tocopherol                                | 1.59E-02  | 5.67E-03 | 5.26E-03 | 3.08E-03  | 1.32E-02 | 8.16E-01 | 5.15E-02  | 3.08E-02 | 9.59E-02 |
| 3-hydroxyisobutyrate                            | -2.36E-03 | 5.77E-03 | 6.83E-01 | -1.12E-05 | 1.33E-02 | 9.99E-01 | -3.33E-02 | 3.10E-02 | 2.84E-01 |
| N-acetylalanine                                 | -8.86E-03 | 6.05E-03 | 1.44E-01 | 2.35E-02  | 1.39E-02 | 9.29E-02 | -5.47E-02 | 3.26E-02 | 9.41E-02 |
| vanillylmandelate (VMA)                         | 5.70E-03  | 5.47E-03 | 2.99E-01 | 2.53E-02  | 1.25E-02 | 4.48E-02 | 1.54E-03  | 2.95E-02 | 9.58E-01 |
| 4-acetamidobutanoate                            | -1.13E-03 | 5.62E-03 | 8.40E-01 | 2.13E-02  | 1.29E-02 | 9.86E-02 | -1.70E-02 | 3.03E-02 | 5.76E-01 |
| 3-aminoisobutyrate                              | -5.07E-03 | 5.80E-03 | 3.83E-01 | -1.67E-02 | 1.33E-02 | 2.12E-01 | -2.16E-02 | 3.13E-02 | 4.90E-01 |
| 3-hydroxy-3-methylglutarate                     | 2.59E-03  | 5.46E-03 | 6.36E-01 | 2.39E-02  | 1.25E-02 | 5.67E-02 | 1.84E-02  | 2.94E-02 | 5.31E-01 |
| citrate                                         | -6.30E-03 | 5.62E-03 | 2.63E-01 | 7.37E-03  | 1.30E-02 | 5.70E-01 | -2.97E-02 | 3.03E-02 | 3.28E-01 |
| 2-aminobutyrate                                 | -4.00E-03 | 5.97E-03 | 5.03E-01 | -4.38E-02 | 1.35E-02 | 1.30E-03 | 1.02E-02  | 3.22E-02 | 7.52E-01 |
| urate                                           | -6.70E-03 | 5.17E-03 | 1.96E-01 | -4.17E-04 | 1.19E-02 | 9.72E-01 | -2.33E-02 | 2.79E-02 | 4.04E-01 |
| ursodeoxycholate                                | -1.66E-02 | 5.89E-03 | 5.20E-03 | -3.60E-02 | 1.36E-02 | 8.39E-03 | -2.16E-02 | 3.21E-02 | 5.02E-01 |
| oleoyl ethanolamide                             | -5.46E-03 | 5.76E-03 | 3.44E-01 | -1.99E-02 | 1.32E-02 | 1.33E-01 | -6.83E-03 | 3.11E-02 | 8.26E-01 |
| gamma-glutamylglutamine                         | -5.41E-03 | 5.69E-03 | 3.43E-01 | -6.59E-04 | 1.31E-02 | 9.60E-01 | -2.36E-02 | 3.07E-02 | 4.43E-01 |
| 4-hydroxyphenylpyruvate                         | -3.51E-03 | 5.44E-03 | 5.19E-01 | 2.80E-03  | 1.25E-02 | 8.23E-01 | -2.97E-02 | 2.93E-02 | 3.12E-01 |
| butyrate/isobutyrate (4:0)                      | 2.43E-03  | 5.56E-03 | 6.63E-01 | 3.73E-03  | 1.28E-02 | 7.71E-01 | 3.49E-02  | 2.99E-02 | 2.44E-01 |
| N-acetylneuraminate                             | -3.08E-03 | 6.00E-03 | 6.08E-01 | 1.39E-02  | 1.38E-02 | 3.15E-01 | -1.46E-02 | 3.24E-02 | 6.53E-01 |
| homovanillate (HVA)                             | 5.40E-03  | 5.68E-03 | 3.43E-01 | 8.15E-03  | 1.31E-02 | 5.34E-01 | 1.15E-02  | 3.07E-02 | 7.09E-01 |
| creatine                                        | -1.18E-02 | 5.50E-03 | 3.34E-02 | -4.57E-02 | 1.25E-02 | 2.98E-04 | -2.28E-02 | 2.99E-02 | 4.46E-01 |
| cys-gly, oxidized                               | -1.90E-02 | 5.70E-03 | 9.52E-04 | -2.15E-02 | 1.33E-02 | 1.07E-01 | -9.94E-02 | 3.07E-02 | 1.37E-03 |
| 2,3-diphosphoglycerate                          | -4.98E-03 | 4.78E-03 | 2.98E-01 | -1.16E-03 | 1.10E-02 | 9.16E-01 | -1.38E-02 | 2.58E-02 | 5.94E-01 |
| estrone 3-sulfate                               | -2.97E-03 | 4.77E-03 | 5.34E-01 | -2.81E-02 | 1.09E-02 | 1.01E-02 | -4.09E-02 | 2.56E-02 | 1.11E-01 |
| dihomo-linoleate (20:2n6)                       | -1.48E-02 | 5.77E-03 | 1.06E-02 | -3.86E-02 | 1.32E-02 | 3.81E-03 | -6.06E-02 | 3.13E-02 | 5.36E-02 |
| gamma-glutamylhistidine                         | 7.94E-03  | 5.75E-03 | 1.68E-01 | 1.42E-02  | 1.32E-02 | 2.85E-01 | 4.38E-02  | 3.10E-02 | 1.58E-01 |
| 2-hydroxystearate                               | -1.01E-02 | 6.05E-03 | 9.67E-02 | -2.85E-02 | 1.39E-02 | 4.09E-02 | -6.11E-02 | 3.26E-02 | 6.17E-02 |
| N1-methyladenosine                              | -6.77E-03 | 5.80E-03 | 2.44E-01 | 7.26E-03  | 1.34E-02 | 5.88E-01 | -6.01E-02 | 3.12E-02 | 5.48E-02 |
| glycerol                                        | -1.74E-02 | 5.15E-03 | 8.26E-04 | -3.67E-02 | 1.19E-02 | 2.24E-03 | -7.75E-02 | 2.79E-02 | 5.87E-03 |
| choline                                         | -4.54E-03 | 6.01E-03 | 4.50E-01 | 8.81E-03  | 1.38E-02 | 5.25E-01 | -1.07E-02 | 3.24E-02 | 7.41E-01 |
| anthranilate                                    | 3.10E-03  | 5.08E-03 | 5.42E-01 | -1.42E-02 | 1.17E-02 | 2.25E-01 | -4.41E-03 | 2.74E-02 | 8.72E-01 |
| gamma-glutamylleucine                           | -1.04E-02 | 5.53E-03 | 6.11E-02 | -5.24E-03 | 1.28E-02 | 6.83E-01 | -4.90E-02 | 2.99E-02 | 1.02E-01 |
| 3-phosphoglycerate                              | -2.27E-03 | 5.73E-03 | 6.93E-01 | 9.16E-05  | 1.32E-02 | 9.94E-01 | -2.19E-02 | 3.09E-02 | 4.78E-01 |
| 3-methoxytyrosine                               | -4.88E-03 | 5.69E-03 | 3.92E-01 | 1.10E-02  | 1.31E-02 | 4.01E-01 | -4.00E-02 | 3.06E-02 | 1.92E-01 |
| cholate                                         | -9.05E-04 | 6.02E-03 | 8.81E-01 | 5.00E-04  | 1.38E-02 | 9.71E-01 | 4.66E-02  | 3.23E-02 | 1.50E-01 |
| fluoxetine                                      | 2.73E-04  | 2.52E-03 | 9.14E-01 | -4.81E-03 | 5.80E-03 | 4.08E-01 | 9.52E-03  | 1.36E-02 | 4.84E-01 |
| 4-acetamidophenol                               | 3.21E-03  | 4.24E-03 | 4.50E-01 | -4.82E-02 | 9.71E-03 | 6.23E-02 | 2.27E-02  | 2.28E-02 | 3.21E-01 |
| naproxen                                        | 2.07E-03  | 3.55E-03 | 5.60E-01 | 1.38E-02  | 8.13E-03 | 8.98E-02 | 1.23E-02  | 1.91E-02 | 5.19E-01 |
| topiramate                                      | -5.13E-04 | 1.53E-03 | 7.38E-01 | -1.13E-03 | 3.53E-03 | 7.50E-01 | 7.68E-03  | 8.25E-03 | 3.53E-01 |
| beta-hydroxyisovalerate                         | -7.24E-03 | 5.39E-03 | 1.81E-01 | -1.75E-02 | 1.24E-02 | 1.59E-01 | -4.00E-03 | 2.91E-02 | 8.91E-01 |
| ibuprofen                                       | 1.95E-03  | 2.92E-03 | 5.04E-01 | -8.54E-03 | 6.72E-03 | 2.05E-01 | -1.72E-03 | 1.58E-02 | 9.13E-01 |
| arachidonoyl ethanolamide                       | -1.11E-02 | 5.54E-03 | 4.59E-02 | -2.29E-02 | 1.28E-02 | 7.39E-02 | -2.32E-02 | 3.00E-02 | 4.41E-01 |
| palmitoyl ethanolamide                          | -1.42E-02 | 5.86E-03 | 1.62E-02 | -3.31E-02 | 1.35E-02 | 1.46E-02 | -7.07E-02 | 3.16E-02 | 2.61E-02 |

Supplementary Table 2: Parameter estimates for metabolome-wide association studies for diet-metabolite associations for each of: The Healthy Eating Index-2015 (HEI-15), DASH and AMED diet

|                                             |           |          |          |           |          |          |           |          |          |
|---------------------------------------------|-----------|----------|----------|-----------|----------|----------|-----------|----------|----------|
| N-linoleoylglycine                          | -5.10E-04 | 5.69E-03 | 9.29E-01 | 1.31E-02  | 1.31E-02 | 3.16E-01 | 2.16E-02  | 3.07E-02 | 4.82E-01 |
| N-palmitoyl-sphingosine (d18:1/16:0)        | -2.72E-03 | 5.90E-03 | 6.45E-01 | -1.90E-02 | 1.35E-02 | 1.61E-01 | -2.70E-02 | 3.17E-02 | 3.96E-01 |
| 1-palmitoyl-2-oleoyl-GPE (16:0/18:1)        | 5.36E-03  | 6.05E-03 | 3.76E-01 | -7.22E-03 | 1.39E-02 | 6.05E-01 | 1.22E-02  | 3.26E-02 | 7.10E-01 |
| 1-palmitoyl-2-linoleoyl-GPI (16:0/18:2)     | -4.32E-03 | 6.00E-03 | 4.72E-01 | -1.90E-02 | 1.38E-02 | 1.70E-01 | -5.75E-03 | 3.24E-02 | 8.59E-01 |
| 1-palmitoyl-2-linoleoyl-GPC (16:0/18:2)     | -7.33E-03 | 5.95E-03 | 2.19E-01 | -3.69E-02 | 1.36E-02 | 6.95E-03 | -8.91E-03 | 3.21E-02 | 7.82E-01 |
| stearoyl sphingomyelin (d18:1/18:0)         | -2.09E-02 | 5.63E-03 | 2.46E-04 | -4.67E-02 | 1.30E-02 | 3.79E-04 | -1.06E-01 | 3.04E-02 | 5.62E-04 |
| 1-palmitoyl-2-oleoyl-GPC (16:0/18:1)        | -3.65E-03 | 5.98E-03 | 5.42E-01 | -4.35E-02 | 1.35E-02 | 1.43E-03 | -1.20E-02 | 3.22E-02 | 7.10E-01 |
| N-stearoyl-sphingosine (d18:1/18:0)*        | -1.60E-02 | 5.88E-03 | 6.84E-03 | -3.86E-02 | 1.35E-02 | 4.56E-03 | -1.01E-01 | 3.15E-02 | 1.53E-03 |
| 5,6-dihydrothymine                          | -1.01E-02 | 5.87E-03 | 8.66E-02 | -1.78E-02 | 1.35E-02 | 1.88E-01 | -8.82E-02 | 3.13E-02 | 5.23E-03 |
| glycochenodeoxycholate                      | -6.14E-04 | 6.04E-03 | 9.19E-01 | -4.09E-03 | 1.39E-02 | 7.69E-01 | -4.04E-02 | 3.25E-02 | 2.15E-01 |
| taurochenodeoxycholate                      | -4.18E-03 | 6.07E-03 | 4.91E-01 | -1.05E-02 | 1.40E-02 | 4.51E-01 | -4.92E-02 | 3.26E-02 | 1.32E-01 |
| taurocholate                                | -2.25E-03 | 5.80E-03 | 6.99E-01 | 3.09E-04  | 1.34E-02 | 9.82E-01 | -2.60E-02 | 3.12E-02 | 4.06E-01 |
| taurodeoxycholate                           | -9.10E-04 | 6.01E-03 | 8.80E-01 | 6.08E-04  | 1.38E-02 | 9.65E-01 | -5.82E-02 | 3.22E-02 | 7.21E-02 |
| hypoxanthine                                | -8.80E-03 | 6.24E-03 | 1.59E-01 | -1.17E-03 | 1.44E-02 | 9.35E-01 | -1.90E-02 | 3.37E-02 | 5.73E-01 |
| 9,10-DiHOME                                 | 4.69E-03  | 5.82E-03 | 4.21E-01 | 3.76E-02  | 1.32E-02 | 4.73E-03 | 3.00E-02  | 3.13E-02 | 3.40E-01 |
| linoleate (18:2n6)                          | -1.16E-02 | 5.63E-03 | 4.05E-02 | -2.61E-02 | 1.30E-02 | 4.49E-02 | -4.58E-02 | 3.04E-02 | 1.33E-01 |
| laurate (12:0)                              | -1.15E-02 | 5.63E-03 | 4.14E-02 | -6.63E-03 | 1.31E-02 | 6.12E-01 | -4.30E-02 | 3.05E-02 | 1.59E-01 |
| quinolinate                                 | -1.30E-02 | 6.16E-03 | 3.51E-02 | 3.35E-04  | 1.43E-02 | 9.81E-01 | -1.18E-01 | 3.27E-02 | 3.86E-04 |
| 2-hydroxyhippurate (salicylurate)           | 1.01E-02  | 6.07E-03 | 9.66E-02 | 4.21E-02  | 1.38E-02 | 2.54E-03 | 2.04E-02  | 3.28E-02 | 5.35E-01 |
| N6,N6-trimethyllysine                       | -1.03E-02 | 5.73E-03 | 7.29E-02 | -3.64E-03 | 1.33E-02 | 7.84E-01 | -4.14E-02 | 3.10E-02 | 1.82E-01 |
| N-acetylputrescine                          | -1.70E-03 | 5.82E-03 | 7.71E-01 | -1.09E-02 | 1.34E-02 | 4.14E-01 | -2.22E-02 | 3.13E-02 | 4.79E-01 |
| N-formylmethionine                          | -9.78E-03 | 5.77E-03 | 9.10E-02 | 1.11E-02  | 1.33E-02 | 4.06E-01 | -7.10E-02 | 3.10E-02 | 2.25E-02 |
| S-adenosylhomocysteine (SAH)                | -1.57E-03 | 5.93E-03 | 7.91E-01 | 2.01E-02  | 1.36E-02 | 1.40E-01 | -4.77E-02 | 3.18E-02 | 1.35E-01 |
| metoprolol                                  | 1.62E-03  | 2.65E-03 | 5.40E-01 | 1.15E-02  | 6.05E-03 | 5.75E-02 | 1.56E-02  | 1.42E-02 | 2.74E-01 |
| azelate (C9-DC)                             | -1.86E-04 | 6.01E-03 | 9.75E-01 | 1.87E-02  | 1.38E-02 | 1.75E-01 | -4.10E-02 | 3.23E-02 | 2.05E-01 |
| 3-(N-acetyl-L-cystein-S-yl) acetaminophen   | 4.42E-03  | 3.86E-03 | 2.54E-01 | 1.86E-02  | 8.83E-03 | 3.57E-02 | 1.17E-02  | 2.08E-02 | 5.75E-01 |
| 4-acetaminophen sulfate                     | 7.28E-03  | 4.88E-03 | 1.37E-01 | 2.80E-02  | 1.11E-02 | 1.24E-02 | 3.13E-02  | 2.63E-02 | 2.35E-01 |
| eicosapentaenoate (EPA; 20:5n3)             | -4.01E-04 | 5.83E-03 | 9.45E-01 | -2.02E-02 | 1.34E-02 | 1.31E-01 | 3.43E-02  | 3.13E-02 | 2.75E-01 |
| methylsuccinate                             | 1.91E-02  | 5.65E-03 | 8.07E-04 | 3.83E-02  | 1.31E-02 | 3.67E-03 | 8.76E-02  | 3.06E-02 | 4.57E-03 |
| ethylmalonate                               | -3.88E-03 | 5.63E-03 | 4.92E-01 | -6.14E-03 | 1.30E-02 | 6.36E-01 | -2.36E-02 | 3.03E-02 | 4.38E-01 |
| adenosine 3',5'-cyclic monophosphate (cAMP) | 5.62E-04  | 5.92E-03 | 9.24E-01 | 1.72E-02  | 1.36E-02 | 2.07E-01 | -2.02E-02 | 3.19E-02 | 5.26E-01 |
| adenosine 5'-monophosphate (AMP)            | -2.46E-03 | 5.95E-03 | 6.80E-01 | 1.29E-02  | 1.37E-02 | 3.48E-01 | -5.94E-04 | 3.21E-02 | 9.85E-01 |
| 5-methylthioadenosine (MTA)                 | -8.20E-03 | 5.95E-03 | 1.69E-01 | -5.79E-04 | 1.37E-02 | 9.66E-01 | -3.98E-02 | 3.21E-02 | 2.16E-01 |
| N6-methyladenosine                          | -9.36E-03 | 5.83E-03 | 1.10E-01 | -3.08E-03 | 1.35E-02 | 8.20E-01 | -6.22E-02 | 3.14E-02 | 4.83E-02 |
| arachidonate (20:4n6)                       | -1.30E-02 | 6.06E-03 | 3.30E-02 | -4.20E-02 | 1.38E-02 | 2.62E-03 | -5.78E-02 | 3.27E-02 | 7.85E-02 |
| arginine                                    | 7.91E-03  | 6.30E-03 | 2.11E-01 | 1.82E-02  | 1.45E-02 | 2.10E-01 | 4.32E-02  | 3.40E-02 | 2.04E-01 |
| aspartate                                   | 2.91E-03  | 5.72E-03 | 6.11E-01 | 4.31E-03  | 1.32E-02 | 7.44E-01 | 7.08E-03  | 3.09E-02 | 8.19E-01 |
| 2-hydroxyphenylacetate                      | 5.42E-04  | 5.87E-03 | 9.26E-01 | 1.87E-02  | 1.35E-02 | 1.67E-01 | 1.19E-02  | 3.16E-02 | 7.07E-01 |
| 3-(4-hydroxyphenyl)lactate                  | -6.20E-03 | 5.12E-03 | 2.27E-01 | -5.30E-03 | 1.18E-02 | 6.54E-01 | -4.25E-03 | 2.76E-02 | 8.78E-01 |
| phenylpyruvate                              | -1.50E-03 | 5.78E-03 | 7.95E-01 | 1.83E-02  | 1.33E-02 | 1.68E-01 | -8.69E-03 | 3.12E-02 | 7.80E-01 |
| beta-alanine                                | -1.58E-03 | 5.95E-03 | 7.91E-01 | 1.57E-02  | 1.37E-02 | 2.53E-01 | -2.51E-02 | 3.20E-02 | 4.35E-01 |
| biliverdin                                  | -8.91E-03 | 5.84E-03 | 1.28E-01 | -1.94E-02 | 1.35E-02 | 1.51E-01 | -2.74E-02 | 3.16E-02 | 3.86E-01 |
| succinate                                   | 3.94E-03  | 5.85E-03 | 5.01E-01 | 7.58E-03  | 1.35E-02 | 5.74E-01 | 3.33E-02  | 3.15E-02 | 2.91E-01 |
| 3-hydroxybutyrate (BHBA)                    | -1.83E-03 | 5.65E-03 | 7.46E-01 | -1.46E-02 | 1.30E-02 | 2.61E-01 | 1.41E-02  | 3.04E-02 | 6.45E-01 |
| cholesterol                                 | 3.41E-03  | 5.89E-03 | 5.63E-01 | -1.17E-02 | 1.36E-02 | 3.88E-01 | 2.52E-02  | 3.17E-02 | 4.28E-01 |
| corticosterone                              | 3.65E-03  | 5.28E-03 | 4.90E-01 | -1.30E-02 | 1.21E-02 | 2.86E-01 | -6.51E-03 | 2.85E-02 | 8.19E-01 |
| cortisone                                   | 1.85E-03  | 6.06E-03 | 7.60E-01 | -2.63E-02 | 1.39E-02 | 5.87E-02 | 2.61E-04  | 3.27E-02 | 9.94E-01 |
| creatinine                                  | -5.34E-03 | 4.96E-03 | 2.83E-01 | 7.61E-03  | 1.14E-02 | 5.06E-01 | -3.81E-02 | 2.67E-02 | 1.55E-01 |
| cysteinylglycine                            | -1.49E-02 | 5.57E-03 | 8.03E-03 | -2.30E-02 | 1.29E-02 | 7.54E-02 | -5.90E-02 | 3.02E-02 | 5.15E-02 |
| cystine                                     | -2.84E-02 | 5.78E-03 | 1.57E-06 | -5.87E-02 | 1.34E-02 | 1.70E-05 | -1.22E-01 | 3.16E-02 | 1.51E-04 |
| sphingosine                                 | -1.08E-02 | 5.96E-03 | 7.16E-02 | -1.87E-02 | 1.38E-02 | 1.74E-01 | -4.25E-02 | 3.22E-02 | 1.89E-01 |
| deoxycholate                                | -7.65E-03 | 5.81E-03 | 1.89E-01 | -2.14E-02 | 1.33E-02 | 1.10E-01 | -1.57E-02 | 3.14E-02 | 6.18E-01 |
| cystathionine                               | 5.14E-03  | 5.89E-03 | 3.83E-01 | 2.81E-02  | 1.35E-02 | 3.77E-02 | 2.67E-02  | 3.17E-02 | 4.00E-01 |
| sphinganine                                 | -7.35E-03 | 6.10E-03 | 2.29E-01 | -1.28E-02 | 1.41E-02 | 3.64E-01 | -4.84E-02 | 3.28E-02 | 1.42E-01 |
| flavin adenine dinucleotide (FAD)           | 5.24E-03  | 5.64E-03 | 3.53E-01 | 4.21E-03  | 1.30E-02 | 7.46E-01 | 2.61E-02  | 3.04E-02 | 3.90E-01 |
| fumarate                                    | -4.31E-03 | 5.62E-03 | 4.43E-01 | -3.54E-03 | 1.29E-02 | 7.85E-01 | 9.15E-04  | 3.03E-02 | 9.76E-01 |
| gamma-glutamylglutamate                     | -9.47E-03 | 5.67E-03 | 9.60E-02 | -8.91E-03 | 1.31E-02 | 4.97E-01 | -4.64E-02 | 3.06E-02 | 1.30E-01 |
| gluconate                                   | -4.01E-03 | 5.72E-03 | 4.84E-01 | 1.48E-02  | 1.32E-02 | 2.63E-01 | -6.93E-03 | 3.09E-02 | 8.23E-01 |
| glutarate (C5-DC)                           | -1.67E-02 | 5.57E-03 | 3.01E-03 | -1.69E-02 | 1.30E-02 | 1.94E-01 | 2.50E-02  | 3.05E-02 | 4.12E-01 |
| glycine                                     | -7.62E-03 | 5.83E-03 | 1.92E-01 | 5.68E-03  | 1.34E-02 | 6.73E-01 | -3.87E-02 | 3.14E-02 | 2.19E-01 |
| glycocholate                                | -4.26E-04 | 6.05E-03 | 9.44E-01 | 6.10E-03  | 1.39E-02 | 6.61E-01 | -2.19E-02 | 3.26E-02 | 5.02E-01 |
| guanidinoacetate                            | 3.43E-03  | 5.78E-03 | 5.53E-01 | 9.82E-03  | 1.33E-02 | 4.61E-01 | 2.27E-02  | 3.11E-02 | 4.66E-01 |
| S-1-pyrroline-5-carboxylate                 | 1.63E-03  | 5.66E-03 | 7.73E-01 | 1.12E-02  | 1.30E-02 | 3.90E-01 | 1.16E-02  | 3.05E-02 | 7.03E-01 |
| histidine                                   | 1.11E-02  | 5.84E-03 | 5.79E-02 | 3.89E-03  | 1.35E-02 | 7.74E-01 | 4.61E-02  | 3.15E-02 | 1.45E-01 |
| cortisol                                    | 3.49E-03  | 6.11E-03 | 5.68E-01 | -1.76E-02 | 1.40E-02 | 2.10E-01 | -1.17E-02 | 3.29E-02 | 7.23E-01 |
| hypotaurine                                 | 2.15E-03  | 5.35E-03 | 6.88E-01 | 1.62E-02  | 1.23E-02 | 1.87E-01 | 2.88E-02  | 2.88E-02 | 3.18E-01 |
| inosine                                     | -4.44E-03 | 5.94E-03 | 4.56E-01 | 3.35E-03  | 1.37E-02 | 8.07E-01 | -3.01E-03 | 3.21E-02 | 9.25E-01 |
| myo-inositol                                | 2.22E-02  | 5.45E-03 | 6.03E-05 | 3.25E-02  | 1.28E-02 | 1.15E-02 | 1.02E-01  | 2.96E-02 | 6.40E-04 |
| isoleucine                                  | -9.91E-03 | 5.10E-03 | 5.31E-02 | -6.24E-03 | 1.18E-02 | 5.98E-01 | -3.77E-02 | 2.76E-02 | 1.73E-01 |
| 2-aminoadipate                              | -3.50E-03 | 5.72E-03 | 5.42E-01 | -7.04E-03 | 1.32E-02 | 5.93E-01 | -6.37E-03 | 3.09E-02 | 8.37E-01 |
| citrulline                                  | -2.96E-03 | 6.02E-03 | 6.23E-01 | 4.94E-03  | 1.39E-02 | 7.22E-01 | 3.33E-02  | 3.24E-02 | 3.05E-01 |
| leucine                                     | -4.46E-03 | 5.12E-03 | 3.85E-01 | -5.85E-03 | 1.18E-02 | 6.21E-01 | -3.30E-02 | 2.76E-02 | 2.33E-01 |
| lithocholate                                | -9.04E-04 | 5.24E-03 | 8.63E-01 | 9.19E-03  | 1.21E-02 | 4.47E-01 | -1.22E-02 | 2.82E-02 | 6.65E-01 |
| lysine                                      | -6.15E-03 | 5.92E-03 | 3.00E-01 | -8.81E-03 | 1.36E-02 | 5.19E-01 | -6.06E-02 | 3.17E-02 | 5.72E-02 |
| malate                                      | -6.01E-03 | 5.81E-03 | 3.02E-01 | 2.07E-03  | 1.34E-02 | 8.77E-01 | -1.12E-02 | 3.14E-02 | 7.21E-01 |
| methionine                                  | -1.13E-02 | 5.52E-03 | 4.24E-02 | -6.63E-03 | 1.28E-02 | 6.05E-01 | -5.56E-02 | 2.98E-02 | 6.33E-02 |
| methylmalonate (MMA)                        | -7.35E-03 | 5.66E-03 | 1.95E-01 | 6.51E-03  | 1.31E-02 | 6.19E-01 | -6.77E-03 | 3.06E-02 | 8.25E-01 |
| palmitate (16:0)                            | -1.87E-02 | 5.69E-03 | 1.17E-03 | -4.41E-02 | 1.31E-02 | 8.64E-04 | -9.19E-02 | 3.08E-02 | 3.07E-03 |
| nicotinamide                                | 1.70E-03  | 6.02E-03 | 7.77E-01 | 2.96E-02  | 1.37E-02 | 3.22E-02 | 1.10E-02  | 3.24E-02 | 7.35E-01 |
| stearate (18:0)                             | -1.64E-02 | 5.87E-03 | 5.44E-03 | -2.98E-02 | 1.36E-02 | 2.87E-02 | -7.27E-02 | 3.18E-02 | 2.28E-02 |
| ornithine                                   | -3.59E-03 | 5.99E-03 | 5.50E-01 | 5.87E-03  | 1.38E-02 | 6.71E-01 | 1.33E-02  | 3.23E-02 | 6.80E-01 |
| orotate                                     | -2.91E-03 | 5.98E-03 | 6.26E-01 | -5.06E-03 | 1.38E-02 | 7.13E-01 | -2.58E-02 | 3.22E-02 | 4.23E-01 |
| palmitoleate (16:1n7)                       | -1.69E-02 | 5.18E-03 | 1.23E-03 | -4.63E-02 | 1.18E-02 | 1.14E-04 | -7.33E-02 | 2.81E-02 | 9.66E-03 |
| phenylalanine                               | -5.24E-03 | 5.91E-03 | 3.76E-01 | -3.36E-03 | 1.36E-02 | 8.05E-01 | -4.37E-02 | 3.18E-02 | 1.70E-01 |

Supplementary Table 2: Parameter estimates for metabolome-wide association studies for diet-metabolite associations for each of: The Healthy Eating Index-2015 (HEI-15), DASH and AMED diet

|                                      |           |          |          |           |          |          |           |          |          |
|--------------------------------------|-----------|----------|----------|-----------|----------|----------|-----------|----------|----------|
| phosphate                            | -1.58E-04 | 6.00E-03 | 9.79E-01 | 6.76E-03  | 1.38E-02 | 6.25E-01 | 8.13E-03  | 3.23E-02 | 8.02E-01 |
| phytanate                            | -4.32E-03 | 5.48E-03 | 4.32E-01 | -1.85E-02 | 1.26E-02 | 1.42E-01 | -2.08E-02 | 2.96E-02 | 4.81E-01 |
| proline                              | -1.95E-02 | 5.79E-03 | 8.64E-04 | -1.65E-02 | 1.36E-02 | 2.25E-01 | -7.87E-02 | 3.15E-02 | 1.30E-02 |
| lactate                              | -6.44E-03 | 5.53E-03 | 2.46E-01 | -3.69E-03 | 1.28E-02 | 7.73E-01 | -1.66E-02 | 2.99E-02 | 5.79E-01 |
| pyridoxal                            | 1.21E-02  | 4.29E-03 | 5.04E-03 | 2.08E-02  | 9.95E-03 | 3.79E-02 | 4.31E-02  | 2.33E-02 | 6.58E-02 |
| retinol (Vitamin A)                  | 6.93E-03  | 5.73E-03 | 2.28E-01 | 7.46E-03  | 1.32E-02 | 5.73E-01 | 4.21E-03  | 3.10E-02 | 8.92E-01 |
| spermidine                           | -2.65E-03 | 5.94E-03 | 6.56E-01 | 1.79E-02  | 1.36E-02 | 1.90E-01 | -2.09E-02 | 3.20E-02 | 5.14E-01 |
| salicylate                           | 1.08E-02  | 6.18E-03 | 8.26E-02 | 4.35E-02  | 1.41E-02 | 2.16E-03 | 2.53E-02  | 3.34E-02 | 4.50E-01 |
| serine                               | -9.94E-03 | 5.80E-03 | 8.73E-02 | -2.76E-02 | 1.33E-02 | 3.92E-02 | -1.96E-02 | 3.14E-02 | 5.33E-01 |
| serotonin                            | 7.85E-03  | 5.84E-03 | 1.80E-01 | 1.60E-02  | 1.34E-02 | 2.35E-01 | 3.64E-02  | 3.15E-02 | 2.49E-01 |
| taurine                              | 5.54E-03  | 6.22E-03 | 3.74E-01 | 7.59E-03  | 1.43E-02 | 5.97E-01 | 4.27E-02  | 3.35E-02 | 2.03E-01 |
| myristate (14:0)                     | -2.07E-02 | 5.33E-03 | 1.33E-04 | -3.80E-02 | 1.24E-02 | 2.38E-03 | -9.71E-02 | 2.89E-02 | 8.98E-04 |
| urea                                 | 3.41E-03  | 5.92E-03 | 5.66E-01 | 2.37E-02  | 1.36E-02 | 8.24E-02 | 2.48E-02  | 3.19E-02 | 4.37E-01 |
| uridine                              | 1.16E-02  | 5.94E-03 | 5.22E-02 | 2.74E-02  | 1.37E-02 | 4.62E-02 | 6.04E-02  | 3.20E-02 | 6.06E-02 |
| 2'-deoxyuridine                      | 1.74E-03  | 6.10E-03 | 7.75E-01 | 4.16E-03  | 1.40E-02 | 7.67E-01 | 8.41E-03  | 3.29E-02 | 7.98E-01 |
| trans-urocanate                      | -8.88E-03 | 5.87E-03 | 1.32E-01 | -6.93E-03 | 1.36E-02 | 6.10E-01 | -2.70E-02 | 3.17E-02 | 3.95E-01 |
| 1-methylnicotinamide                 | -3.49E-03 | 6.08E-03 | 5.67E-01 | -6.67E-03 | 1.40E-02 | 6.34E-01 | -4.78E-02 | 3.27E-02 | 1.44E-01 |
| glutamate                            | -6.47E-03 | 5.39E-03 | 2.31E-01 | -6.79E-03 | 1.24E-02 | 5.85E-01 | -3.30E-02 | 2.91E-02 | 2.57E-01 |
| glutamine                            | -2.27E-03 | 5.65E-03 | 6.88E-01 | -3.84E-03 | 1.30E-02 | 7.68E-01 | -1.88E-02 | 3.04E-02 | 5.37E-01 |
| threonine                            | -1.80E-02 | 5.90E-03 | 2.49E-03 | -2.27E-02 | 1.37E-02 | 1.00E-01 | -5.64E-02 | 3.22E-02 | 8.09E-02 |
| tryptophan                           | 6.83E-03  | 5.51E-03 | 2.17E-01 | 1.44E-02  | 1.27E-02 | 2.58E-01 | 3.62E-03  | 2.98E-02 | 9.03E-01 |
| valine                               | -5.15E-03 | 5.51E-03 | 3.50E-01 | 2.50E-03  | 1.27E-02 | 8.44E-01 | -1.13E-02 | 2.97E-02 | 7.04E-01 |
| glucose                              | -1.47E-02 | 6.00E-03 | 1.48E-02 | -3.61E-02 | 1.38E-02 | 9.47E-03 | -7.19E-02 | 3.24E-02 | 2.73E-02 |
| 12,13-DiHOME                         | 7.42E-03  | 5.55E-03 | 1.83E-01 | 3.29E-02  | 1.27E-02 | 9.93E-03 | 4.01E-02  | 2.99E-02 | 1.81E-01 |
| alpha-ketobutyrate                   | -7.00E-03 | 5.76E-03 | 2.25E-01 | -3.01E-02 | 1.32E-02 | 2.33E-02 | -9.23E-03 | 3.11E-02 | 7.67E-01 |
| betaine                              | 1.32E-02  | 5.78E-03 | 2.35E-02 | 3.05E-02  | 1.33E-02 | 2.26E-02 | 8.47E-02  | 3.10E-02 | 6.75E-03 |
| cysteine                             | -1.09E-02 | 5.74E-03 | 5.87E-02 | -1.15E-02 | 1.33E-02 | 3.89E-01 | -7.70E-02 | 3.08E-02 | 1.31E-02 |
| mannose                              | -1.76E-02 | 5.69E-03 | 2.14E-03 | -3.99E-02 | 1.31E-02 | 2.51E-03 | -9.71E-02 | 3.06E-02 | 1.68E-03 |
| dimethylglycine                      | 4.76E-03  | 5.86E-03 | 4.17E-01 | 2.41E-02  | 1.34E-02 | 7.40E-02 | 2.50E-02  | 3.16E-02 | 4.30E-01 |
| alanine                              | -1.64E-02 | 5.99E-03 | 6.57E-03 | -2.94E-02 | 1.39E-02 | 3.47E-02 | -8.13E-02 | 3.23E-02 | 1.25E-02 |
| tyrosine                             | -4.69E-04 | 5.90E-03 | 9.37E-01 | -6.20E-03 | 1.36E-02 | 6.48E-01 | -1.70E-02 | 3.18E-02 | 5.94E-01 |
| pseudouridine                        | -4.80E-03 | 5.67E-03 | 3.98E-01 | -1.10E-02 | 1.31E-02 | 3.99E-01 | -5.43E-02 | 3.04E-02 | 7.58E-02 |
| pyruvate                             | -1.25E-02 | 5.82E-03 | 3.32E-02 | -1.69E-02 | 1.35E-02 | 2.10E-01 | -5.88E-02 | 3.14E-02 | 6.21E-02 |
| uracil                               | 7.78E-03  | 5.64E-03 | 1.69E-01 | 2.78E-02  | 1.29E-02 | 3.24E-02 | 8.95E-02  | 3.00E-02 | 3.14E-03 |
| xylose                               | 1.34E-02  | 5.37E-03 | 1.28E-02 | 2.33E-02  | 1.24E-02 | 6.20E-02 | 6.02E-02  | 2.90E-02 | 3.90E-02 |
| cytidine                             | -7.47E-03 | 6.11E-03 | 2.23E-01 | 6.57E-03  | 1.41E-02 | 6.41E-01 | -6.26E-03 | 3.30E-02 | 8.50E-01 |
| arabinose                            | 6.09E-03  | 5.19E-03 | 2.42E-01 | 1.06E-02  | 1.20E-02 | 3.79E-01 | 4.83E-02  | 2.79E-02 | 8.49E-02 |
| cotinine                             | -5.08E-03 | 3.06E-03 | 9.78E-02 | -1.66E-02 | 7.01E-03 | 1.85E-02 | -7.93E-03 | 1.66E-02 | 6.32E-01 |
| caffeine                             | -1.35E-02 | 5.87E-03 | 2.21E-02 | -3.02E-02 | 1.35E-02 | 2.65E-02 | -5.37E-02 | 3.18E-02 | 9.19E-02 |
| fructose                             | -2.27E-03 | 6.02E-03 | 7.06E-01 | -1.16E-02 | 1.38E-02 | 4.03E-01 | -1.02E-03 | 3.25E-02 | 9.75E-01 |
| adenine                              | -8.71E-03 | 5.88E-03 | 1.39E-01 | -1.61E-02 | 1.35E-02 | 2.35E-01 | -6.83E-02 | 3.15E-02 | 3.11E-02 |
| cytosine                             | 5.92E-03  | 4.75E-03 | 2.14E-01 | 5.90E-03  | 1.10E-02 | 5.91E-01 | 2.82E-02  | 2.56E-02 | 2.72E-01 |
| caprate (10:0)                       | -1.23E-02 | 5.73E-03 | 3.35E-02 | -2.56E-02 | 1.32E-02 | 5.42E-02 | -3.10E-02 | 3.11E-02 | 3.20E-01 |
| margarate (17:0)                     | -2.32E-02 | 5.80E-03 | 8.14E-05 | -4.34E-02 | 1.35E-02 | 1.44E-03 | -1.12E-01 | 3.15E-02 | 4.45E-04 |
| nonadecanoate (19:0)                 | -1.09E-02 | 5.81E-03 | 6.21E-02 | -1.91E-02 | 1.34E-02 | 1.55E-01 | -5.10E-02 | 3.14E-02 | 1.05E-01 |
| arachidate (20:0)                    | 1.41E-03  | 5.89E-03 | 8.10E-01 | 7.77E-03  | 1.35E-02 | 5.67E-01 | 6.28E-03  | 3.17E-02 | 8.43E-01 |
| maltose                              | -2.03E-05 | 6.13E-03 | 9.97E-01 | 1.94E-02  | 1.41E-02 | 1.70E-01 | 1.33E-02  | 3.30E-02 | 6.87E-01 |
| asparagine                           | 6.01E-03  | 5.87E-03 | 3.07E-01 | 1.75E-02  | 1.35E-02 | 1.96E-01 | 4.06E-02  | 3.16E-02 | 2.00E-01 |
| N-stearoyl-sphinganine (d18:0/18:0)* | -2.14E-02 | 5.91E-03 | 3.49E-04 | -6.69E-02 | 1.33E-02 | 9.37E-07 | -1.12E-01 | 3.19E-02 | 5.03E-04 |
| dihydroorotate                       | 4.34E-04  | 5.80E-03 | 9.40E-01 | -8.68E-03 | 1.33E-02 | 5.16E-01 | -3.65E-02 | 3.12E-02 | 2.42E-01 |
| alpha-ketoglutarate                  | -1.40E-02 | 5.83E-03 | 1.73E-02 | -1.35E-02 | 1.35E-02 | 3.19E-01 | -5.37E-02 | 3.16E-02 | 9.03E-02 |
| caprylate (8:0)                      | -5.49E-03 | 5.58E-03 | 3.26E-01 | -2.23E-02 | 1.28E-02 | 8.23E-02 | 4.17E-03  | 3.01E-02 | 8.90E-01 |
| sucrose                              | -2.04E-03 | 5.59E-03 | 7.15E-01 | 2.85E-02  | 1.28E-02 | 2.60E-02 | -2.98E-02 | 3.01E-02 | 3.23E-01 |
| kynurenate                           | -2.43E-03 | 5.72E-03 | 6.72E-01 | 2.28E-03  | 1.32E-02 | 8.62E-01 | -5.24E-02 | 3.07E-02 | 8.90E-02 |
| pentadecanoate (15:0)                | -2.19E-02 | 5.39E-03 | 6.52E-05 | -3.64E-02 | 1.26E-02 | 4.15E-03 | -1.13E-01 | 2.91E-02 | 1.37E-04 |
| X-07765                              | -1.57E-02 | 6.04E-03 | 1.00E-02 | -2.09E-02 | 1.40E-02 | 1.36E-01 | -8.51E-02 | 3.26E-02 | 9.42E-03 |
| X-10458                              | 1.09E-02  | 5.84E-03 | 6.37E-02 | 2.31E-02  | 1.34E-02 | 8.70E-02 | 3.56E-02  | 3.16E-02 | 2.60E-01 |
| X-11299                              | -5.79E-03 | 6.27E-03 | 3.56E-01 | -3.13E-02 | 1.43E-02 | 2.97E-02 | -2.93E-02 | 3.38E-02 | 3.87E-01 |
| X-11308                              | -2.02E-02 | 5.74E-03 | 5.21E-04 | -4.32E-02 | 1.33E-02 | 1.25E-03 | -7.72E-02 | 3.13E-02 | 1.42E-02 |
| X-11315                              | 3.89E-02  | 5.11E-03 | 3.76E-13 | 6.56E-02  | 1.23E-02 | 2.05E-07 | 1.70E-01  | 2.85E-02 | 7.02E-09 |
| X-11372                              | -1.49E-02 | 5.90E-03 | 1.21E-02 | -1.60E-02 | 1.37E-02 | 2.45E-01 | -4.60E-02 | 3.20E-02 | 1.52E-01 |
| X-11381                              | -1.99E-02 | 5.69E-03 | 5.44E-04 | -5.60E-02 | 1.30E-02 | 2.17E-05 | -1.17E-01 | 3.06E-02 | 1.70E-04 |
| X-11444                              | -1.03E-03 | 5.71E-03 | 8.57E-01 | 9.38E-03  | 1.31E-02 | 4.76E-01 | -3.23E-02 | 3.07E-02 | 2.95E-01 |
| X-11470                              | -1.32E-03 | 5.52E-03 | 8.12E-01 | -7.06E-03 | 1.27E-02 | 5.79E-01 | -3.35E-02 | 2.97E-02 | 2.60E-01 |
| X-11478                              | -1.97E-02 | 6.01E-03 | 1.22E-03 | -2.51E-02 | 1.40E-02 | 7.45E-02 | -9.50E-02 | 3.25E-02 | 3.79E-03 |
| X-11483                              | -8.61E-03 | 6.23E-03 | 1.68E-01 | -3.64E-02 | 1.42E-02 | 1.11E-02 | -3.52E-02 | 3.36E-02 | 2.96E-01 |
| X-11632                              | -4.01E-03 | 5.88E-03 | 4.95E-01 | -1.03E-02 | 1.35E-02 | 4.48E-01 | -1.30E-02 | 3.17E-02 | 6.81E-01 |
| X-11787                              | 2.08E-02  | 5.55E-03 | 2.21E-04 | 4.02E-02  | 1.29E-02 | 1.97E-03 | 6.95E-02  | 3.04E-02 | 2.28E-02 |
| X-11795                              | -3.36E-03 | 5.79E-03 | 5.62E-01 | -3.44E-02 | 1.32E-02 | 9.59E-03 | 1.02E-02  | 3.12E-02 | 7.45E-01 |
| X-11843                              | 1.40E-03  | 5.80E-03 | 8.10E-01 | -3.68E-04 | 1.34E-02 | 9.78E-01 | -5.11E-02 | 3.11E-02 | 1.02E-01 |
| X-11847                              | 2.15E-02  | 5.27E-03 | 5.66E-05 | 1.41E-02  | 1.25E-02 | 2.60E-01 | 1.05E-01  | 2.85E-02 | 2.74E-04 |
| X-11849                              | 1.83E-02  | 5.15E-03 | 4.62E-04 | 1.13E-02  | 1.21E-02 | 3.50E-01 | 1.03E-01  | 2.77E-02 | 2.47E-04 |
| X-11850                              | 7.64E-03  | 5.91E-03 | 1.97E-01 | 1.23E-02  | 1.36E-02 | 3.68E-01 | -2.49E-02 | 3.19E-02 | 4.36E-01 |
| X-11852                              | 6.57E-03  | 6.15E-03 | 2.86E-01 | 1.04E-02  | 1.42E-02 | 4.64E-01 | 1.84E-02  | 3.32E-02 | 5.79E-01 |
| X-11858                              | 1.43E-02  | 5.04E-03 | 4.97E-03 | 9.59E-03  | 1.17E-02 | 4.15E-01 | 8.31E-02  | 2.71E-02 | 2.37E-03 |
| X-11880                              | -2.12E-02 | 5.90E-03 | 3.98E-04 | -2.64E-02 | 1.38E-02 | 5.64E-02 | -8.33E-02 | 3.21E-02 | 1.01E-02 |
| X-11979                              | 4.40E-03  | 5.75E-03 | 4.45E-01 | 2.79E-02  | 1.31E-02 | 3.45E-02 | -1.24E-02 | 3.10E-02 | 6.90E-01 |
| X-12007                              | 7.60E-03  | 5.81E-03 | 1.92E-01 | 2.77E-02  | 1.33E-02 | 3.86E-02 | 1.72E-02  | 3.14E-02 | 5.85E-01 |
| X-12013                              | 2.27E-03  | 5.67E-03 | 6.90E-01 | 7.60E-03  | 1.30E-02 | 5.61E-01 | -4.10E-02 | 3.05E-02 | 1.80E-01 |
| X-12026                              | -8.55E-03 | 6.05E-03 | 1.59E-01 | 2.17E-02  | 1.39E-02 | 1.21E-01 | -8.01E-02 | 3.24E-02 | 1.40E-02 |
| X-12027                              | 3.89E-03  | 4.51E-03 | 3.89E-01 | 2.15E-02  | 1.03E-02 | 3.77E-02 | -1.64E-02 | 2.43E-02 | 5.01E-01 |
| X-12100                              | -2.47E-03 | 5.94E-03 | 6.78E-01 | 1.43E-02  | 1.37E-02 | 2.94E-01 | -3.51E-02 | 3.20E-02 | 2.74E-01 |
| X-12101                              | -6.17E-03 | 5.68E-03 | 2.79E-01 | -1.29E-02 | 1.31E-02 | 3.26E-01 | 1.46E-02  | 3.07E-02 | 6.34E-01 |
| X-12104                              | -1.03E-02 | 6.18E-03 | 9.70E-02 | 2.17E-02  | 1.42E-02 | 1.29E-01 | -6.38E-02 | 3.33E-02 | 5.59E-02 |

Supplementary Table 2: Parameter estimates for metabolome-wide association studies for diet-metabolite associations for each of: The Healthy Eating Index-2015 (HEI-15), DASH and AMED diet

|         |           |          |          |           |          |          |           |          |          |
|---------|-----------|----------|----------|-----------|----------|----------|-----------|----------|----------|
| X-12111 | 1.59E-02  | 5.20E-03 | 2.48E-03 | 4.61E-02  | 1.18E-02 | 1.25E-04 | 4.68E-02  | 2.83E-02 | 9.97E-02 |
| X-12193 | 3.46E-03  | 5.97E-03 | 5.62E-01 | 2.33E-02  | 1.37E-02 | 9.03E-02 | 3.15E-02  | 3.21E-02 | 3.28E-01 |
| X-12216 | 9.83E-04  | 5.94E-03 | 8.69E-01 | 1.33E-02  | 1.36E-02 | 3.32E-01 | -2.10E-02 | 3.20E-02 | 5.13E-01 |
| X-12221 | 8.85E-03  | 4.95E-03 | 7.46E-02 | 9.99E-03  | 1.14E-02 | 3.83E-01 | 1.06E-02  | 2.68E-02 | 6.93E-01 |
| X-12261 | 2.83E-03  | 5.32E-03 | 5.95E-01 | 8.05E-03  | 1.22E-02 | 5.11E-01 | -2.50E-02 | 2.86E-02 | 3.83E-01 |
| X-12262 | 3.45E-03  | 4.75E-03 | 4.69E-01 | 8.20E-03  | 1.09E-02 | 4.54E-01 | -1.06E-02 | 2.56E-02 | 6.80E-01 |
| X-12306 | 2.37E-02  | 5.20E-03 | 7.98E-06 | 3.78E-02  | 1.22E-02 | 2.17E-03 | 1.36E-01  | 2.79E-02 | 1.87E-06 |
| X-12407 | 2.97E-04  | 5.37E-03 | 9.56E-01 | 1.12E-02  | 1.23E-02 | 3.66E-01 | -6.52E-04 | 2.89E-02 | 9.82E-01 |
| X-12410 | 2.00E-02  | 5.58E-03 | 4.04E-04 | 3.86E-02  | 1.29E-02 | 3.10E-03 | 4.61E-02  | 3.06E-02 | 1.33E-01 |
| X-12411 | 2.70E-03  | 5.62E-03 | 6.31E-01 | 1.40E-02  | 1.29E-02 | 2.80E-01 | -1.85E-02 | 3.03E-02 | 5.42E-01 |
| X-12456 | -1.48E-02 | 5.64E-03 | 9.35E-03 | -3.07E-02 | 1.30E-02 | 1.91E-02 | -1.03E-01 | 3.02E-02 | 7.43E-04 |
| X-12544 | 8.28E-03  | 6.17E-03 | 1.81E-01 | 2.98E-02  | 1.41E-02 | 3.55E-02 | -1.23E-02 | 3.33E-02 | 7.12E-01 |
| X-12680 | 1.08E-02  | 5.89E-03 | 6.79E-02 | 6.93E-02  | 1.30E-02 | 2.02E-07 | 4.13E-02  | 3.19E-02 | 1.96E-01 |
| X-12701 | 5.89E-03  | 4.25E-03 | 1.67E-01 | 1.77E-02  | 9.77E-03 | 7.16E-02 | -7.95E-03 | 2.30E-02 | 7.30E-01 |
| X-12707 | -2.58E-03 | 5.93E-03 | 6.64E-01 | 1.95E-02  | 1.36E-02 | 1.54E-01 | -1.54E-02 | 3.20E-02 | 6.30E-01 |
| X-12714 | 6.65E-03  | 4.92E-03 | 1.77E-01 | 1.50E-02  | 1.13E-02 | 1.87E-01 | 1.23E-02  | 2.66E-02 | 6.44E-01 |
| X-12726 | 2.96E-02  | 5.46E-03 | 1.25E-07 | 5.71E-02  | 1.28E-02 | 1.11E-05 | 1.27E-01  | 3.00E-02 | 2.96E-05 |
| X-12729 | 4.42E-03  | 5.19E-03 | 3.95E-01 | 1.79E-02  | 1.19E-02 | 1.35E-01 | 4.38E-02  | 2.79E-02 | 1.18E-01 |
| X-12730 | 4.71E-03  | 4.80E-03 | 3.28E-01 | -2.57E-03 | 1.11E-02 | 8.16E-01 | -1.13E-02 | 2.59E-02 | 6.64E-01 |
| X-12731 | 1.00E-02  | 4.95E-03 | 4.33E-02 | 2.86E-02  | 1.14E-02 | 1.24E-02 | 1.01E-02  | 2.69E-02 | 7.06E-01 |
| X-12738 | 2.87E-03  | 4.53E-03 | 5.27E-01 | 6.98E-03  | 1.04E-02 | 5.04E-01 | 1.39E-02  | 2.44E-02 | 5.71E-01 |
| X-12740 | 7.10E-03  | 5.75E-03 | 2.18E-01 | 1.37E-02  | 1.33E-02 | 3.03E-01 | 5.55E-02  | 3.09E-02 | 7.37E-02 |
| X-12798 | -1.04E-02 | 5.49E-03 | 5.96E-02 | -2.72E-02 | 1.26E-02 | 3.22E-02 | -5.34E-02 | 2.96E-02 | 7.22E-02 |
| X-12812 | 1.25E-02  | 5.74E-03 | 3.02E-02 | 2.89E-02  | 1.32E-02 | 2.94E-02 | 5.41E-02  | 3.10E-02 | 8.21E-02 |
| X-12815 | 6.45E-04  | 4.22E-03 | 8.79E-01 | 3.14E-04  | 9.70E-03 | 9.74E-01 | 1.27E-02  | 2.27E-02 | 5.78E-01 |
| X-12816 | 1.99E-04  | 5.01E-03 | 9.68E-01 | -1.64E-02 | 1.15E-02 | 1.55E-01 | -2.25E-03 | 2.70E-02 | 9.34E-01 |
| X-12822 | -9.23E-03 | 5.87E-03 | 1.17E-01 | -1.59E-02 | 1.35E-02 | 2.40E-01 | -1.34E-02 | 3.17E-02 | 6.73E-01 |
| X-12830 | 1.85E-03  | 5.66E-03 | 7.44E-01 | -1.84E-02 | 1.30E-02 | 1.58E-01 | 1.43E-02  | 3.05E-02 | 6.40E-01 |
| X-12839 | -8.89E-03 | 5.27E-03 | 9.27E-02 | -2.09E-02 | 1.21E-02 | 8.62E-02 | -4.27E-02 | 2.84E-02 | 1.34E-01 |
| X-12844 | 9.13E-03  | 5.67E-03 | 1.09E-01 | 6.03E-03  | 1.31E-02 | 6.46E-01 | 7.93E-03  | 3.07E-02 | 7.96E-01 |
| X-12847 | -1.48E-03 | 6.10E-03 | 8.09E-01 | -7.55E-03 | 1.40E-02 | 5.91E-01 | 9.97E-03  | 3.29E-02 | 7.62E-01 |
| X-12849 | 2.20E-03  | 5.69E-03 | 7.00E-01 | -5.44E-03 | 1.31E-02 | 6.78E-01 | -8.63E-03 | 3.07E-02 | 7.78E-01 |
| X-12851 | 1.67E-03  | 5.76E-03 | 7.72E-01 | 4.40E-04  | 1.33E-02 | 9.74E-01 | 7.37E-03  | 3.11E-02 | 8.13E-01 |
| X-12906 | 1.11E-02  | 5.81E-03 | 5.65E-02 | 3.58E-02  | 1.33E-02 | 7.50E-03 | 4.53E-02  | 3.14E-02 | 1.50E-01 |
| X-13431 | -8.81E-03 | 5.67E-03 | 1.21E-01 | -9.36E-03 | 1.31E-02 | 4.75E-01 | -3.67E-02 | 3.06E-02 | 2.31E-01 |
| X-13507 | 1.34E-02  | 5.14E-03 | 9.47E-03 | 2.32E-02  | 1.19E-02 | 5.24E-02 | 7.38E-02  | 2.77E-02 | 8.07E-03 |
| X-13553 | -3.91E-03 | 5.51E-03 | 4.78E-01 | 1.59E-02  | 1.27E-02 | 2.11E-01 | -3.12E-02 | 2.96E-02 | 2.94E-01 |
| X-13658 | -1.47E-04 | 5.22E-03 | 9.78E-01 | 1.29E-02  | 1.20E-02 | 2.83E-01 | 9.68E-03  | 2.82E-02 | 7.31E-01 |
| X-13695 | 7.98E-03  | 5.31E-03 | 1.34E-01 | 7.01E-03  | 1.23E-02 | 5.68E-01 | 1.54E-02  | 2.87E-02 | 5.93E-01 |
| X-13723 | 8.99E-03  | 4.54E-03 | 4.85E-02 | 2.05E-02  | 1.04E-02 | 5.08E-02 | 4.55E-02  | 2.45E-02 | 6.41E-02 |
| X-13726 | 1.55E-02  | 5.43E-03 | 4.51E-03 | 3.25E-02  | 1.25E-02 | 1.01E-02 | 3.95E-02  | 2.96E-02 | 1.83E-01 |
| X-13728 | -7.34E-03 | 5.78E-03 | 2.05E-01 | 9.89E-03  | 1.33E-02 | 4.59E-01 | -2.39E-02 | 3.12E-02 | 4.44E-01 |
| X-13729 | 3.61E-04  | 5.97E-03 | 9.52E-01 | 2.40E-02  | 1.37E-02 | 8.06E-02 | -2.13E-02 | 3.21E-02 | 5.07E-01 |
| X-13844 | 1.20E-02  | 5.30E-03 | 2.46E-02 | 3.75E-02  | 1.21E-02 | 2.16E-03 | 2.89E-02  | 2.88E-02 | 3.17E-01 |
| X-13846 | 5.25E-03  | 3.68E-03 | 1.55E-01 | 5.29E-03  | 8.50E-03 | 5.34E-01 | 1.16E-02  | 1.99E-02 | 5.60E-01 |
| X-13866 | 4.40E-03  | 5.98E-03 | 4.62E-01 | -6.56E-03 | 1.38E-02 | 6.34E-01 | 5.54E-02  | 3.21E-02 | 8.50E-02 |
| X-14056 | -2.81E-02 | 5.48E-03 | 5.54E-07 | -5.10E-02 | 1.28E-02 | 9.08E-05 | -1.14E-01 | 3.01E-02 | 1.97E-04 |
| X-14939 | -9.59E-03 | 5.82E-03 | 1.00E-01 | -1.97E-02 | 1.34E-02 | 1.42E-01 | -2.32E-02 | 3.15E-02 | 4.62E-01 |
| X-15486 | -2.53E-02 | 5.93E-03 | 2.66E-05 | -3.65E-02 | 1.39E-02 | 9.11E-03 | -1.19E-01 | 3.22E-02 | 2.71E-04 |
| X-15503 | -4.50E-03 | 5.83E-03 | 4.40E-01 | 2.02E-02  | 1.34E-02 | 1.32E-01 | -5.58E-02 | 3.13E-02 | 7.53E-02 |
| X-15728 | 1.24E-02  | 5.88E-03 | 3.55E-02 | 1.06E-02  | 1.36E-02 | 4.38E-01 | 2.63E-02  | 3.19E-02 | 4.10E-01 |
| X-16087 | -1.61E-02 | 5.80E-03 | 5.84E-03 | -3.16E-02 | 1.34E-02 | 1.89E-02 | -5.61E-02 | 3.15E-02 | 7.58E-02 |
| X-16124 | 5.60E-03  | 5.58E-03 | 3.16E-01 | -5.59E-03 | 1.29E-02 | 6.64E-01 | 2.50E-02  | 3.01E-02 | 4.07E-01 |
| X-16397 | -1.14E-02 | 5.65E-03 | 4.46E-02 | -1.98E-02 | 1.30E-02 | 1.30E-01 | -2.48E-02 | 3.06E-02 | 4.18E-01 |
| X-16576 | 4.55E-03  | 5.64E-03 | 4.21E-01 | 4.94E-03  | 1.30E-02 | 7.04E-01 | 1.20E-02  | 3.04E-02 | 6.93E-01 |
| X-16580 | -1.21E-02 | 5.76E-03 | 3.61E-02 | -1.77E-02 | 1.33E-02 | 1.85E-01 | -3.84E-02 | 3.12E-02 | 2.19E-01 |
| X-16649 | 7.22E-03  | 4.96E-03 | 1.47E-01 | 2.24E-02  | 1.14E-02 | 5.00E-02 | 2.02E-02  | 2.68E-02 | 4.52E-01 |
| X-16935 | -2.28E-02 | 5.38E-03 | 2.97E-05 | -3.41E-02 | 1.26E-02 | 7.30E-03 | -6.85E-02 | 2.96E-02 | 2.14E-02 |
| X-16964 | -1.12E-02 | 5.78E-03 | 5.29E-02 | -4.93E-02 | 1.31E-02 | 1.98E-04 | -5.79E-02 | 3.12E-02 | 6.41E-02 |
| X-17010 | -1.35E-03 | 5.70E-03 | 8.13E-01 | -1.82E-02 | 1.31E-02 | 1.64E-01 | -1.45E-03 | 3.07E-02 | 9.62E-01 |
| X-17146 | -5.71E-04 | 6.01E-03 | 9.24E-01 | -1.82E-02 | 1.38E-02 | 1.88E-01 | -5.42E-03 | 3.24E-02 | 8.67E-01 |
| X-17162 | -3.28E-03 | 5.03E-03 | 5.16E-01 | -9.80E-03 | 1.16E-02 | 3.98E-01 | -2.90E-02 | 2.71E-02 | 2.85E-01 |
| X-17301 | -1.10E-03 | 2.87E-03 | 7.00E-01 | -9.12E-03 | 6.58E-03 | 1.67E-01 | -5.69E-03 | 1.55E-02 | 7.13E-01 |
| X-17306 | -4.98E-05 | 2.56E-03 | 9.84E-01 | -1.01E-02 | 5.86E-03 | 8.67E-02 | 3.00E-03  | 1.38E-02 | 8.28E-01 |
| X-17325 | 9.41E-03  | 5.62E-03 | 9.54E-02 | 3.40E-02  | 1.28E-02 | 8.58E-03 | 3.39E-02  | 3.04E-02 | 2.66E-01 |
| X-17335 | -4.37E-03 | 5.67E-03 | 4.41E-01 | -1.93E-02 | 1.30E-02 | 1.39E-01 | -2.47E-02 | 3.05E-02 | 4.20E-01 |
| X-17346 | -1.52E-02 | 5.84E-03 | 9.78E-03 | -7.84E-03 | 1.36E-02 | 5.65E-01 | -8.82E-02 | 3.14E-02 | 5.35E-03 |
| X-17348 | 5.70E-03  | 4.61E-03 | 2.17E-01 | -1.28E-03 | 1.06E-02 | 9.04E-01 | 3.60E-02  | 2.48E-02 | 1.48E-01 |
| X-17351 | 2.61E-02  | 5.40E-03 | 2.13E-06 | 5.86E-02  | 1.25E-02 | 4.06E-06 | 1.08E-01  | 2.96E-02 | 3.15E-04 |
| X-17353 | -3.17E-04 | 4.90E-03 | 9.48E-01 | 6.75E-03  | 1.13E-02 | 5.49E-01 | 3.89E-03  | 2.64E-02 | 8.83E-01 |
| X-17354 | 2.20E-02  | 5.11E-03 | 2.37E-05 | 3.64E-02  | 1.20E-02 | 2.55E-03 | 8.37E-02  | 2.80E-02 | 3.05E-03 |
| X-17357 | 1.33E-04  | 5.65E-03 | 9.81E-01 | -2.84E-03 | 1.30E-02 | 8.27E-01 | -2.09E-02 | 3.04E-02 | 4.92E-01 |
| X-17365 | 2.34E-03  | 5.33E-03 | 6.61E-01 | -5.13E-03 | 1.23E-02 | 6.76E-01 | 6.30E-02  | 2.85E-02 | 2.78E-02 |
| X-17367 | 5.68E-03  | 5.44E-03 | 2.97E-01 | 2.94E-02  | 1.24E-02 | 1.85E-02 | 1.74E-02  | 2.93E-02 | 5.53E-01 |
| X-17438 | 2.24E-02  | 5.80E-03 | 1.43E-04 | 3.62E-02  | 1.35E-02 | 7.79E-03 | 7.41E-02  | 3.18E-02 | 2.03E-02 |
| X-17612 | 5.89E-03  | 5.85E-03 | 3.16E-01 | 8.85E-03  | 1.35E-02 | 5.12E-01 | -1.19E-02 | 3.16E-02 | 7.06E-01 |
| X-17653 | -1.17E-02 | 5.96E-03 | 5.08E-02 | -1.92E-02 | 1.38E-02 | 1.65E-01 | -6.35E-02 | 3.21E-02 | 4.90E-02 |
| X-17654 | 2.27E-03  | 5.71E-03 | 6.92E-01 | 2.02E-02  | 1.31E-02 | 1.23E-01 | 1.29E-02  | 3.08E-02 | 6.74E-01 |
| X-17655 | 2.94E-03  | 4.03E-03 | 4.66E-01 | -4.23E-03 | 9.28E-03 | 6.49E-01 | 1.32E-02  | 2.17E-02 | 5.43E-01 |
| X-17676 | 2.74E-03  | 5.89E-03 | 6.42E-01 | 3.44E-02  | 1.34E-02 | 1.08E-02 | -1.12E-02 | 3.18E-02 | 7.25E-01 |
| X-17682 | -1.09E-02 | 4.77E-03 | 2.33E-02 | -7.79E-03 | 1.11E-02 | 4.82E-01 | -5.44E-02 | 2.57E-02 | 3.56E-02 |
| X-17685 | 5.46E-03  | 5.62E-03 | 3.33E-01 | 8.83E-03  | 1.30E-02 | 4.96E-01 | 6.83E-02  | 3.01E-02 | 2.39E-02 |
| X-17686 | 8.81E-03  | 4.63E-03 | 5.79E-02 | 1.37E-02  | 1.07E-02 | 2.01E-01 | 2.69E-02  | 2.50E-02 | 2.83E-01 |
| X-17690 | 6.80E-03  | 6.02E-03 | 2.59E-01 | -5.08E-03 | 1.39E-02 | 7.14E-01 | 3.90E-02  | 3.24E-02 | 2.30E-01 |

Supplementary Table 2: Parameter estimates for metabolome-wide association studies for diet-metabolite associations for each of: The Healthy Eating Index-2015 (HEI-15), DASH and AMED diet

|         |           |          |          |           |          |          |           |          |          |
|---------|-----------|----------|----------|-----------|----------|----------|-----------|----------|----------|
| X-17692 | -4.50E-03 | 4.52E-03 | 3.20E-01 | -1.32E-02 | 1.04E-02 | 2.05E-01 | 7.35E-03  | 2.44E-02 | 7.63E-01 |
| X-17735 | 1.07E-03  | 5.43E-03 | 8.44E-01 | 1.87E-02  | 1.25E-02 | 1.34E-01 | -1.73E-03 | 2.93E-02 | 9.53E-01 |
| X-17761 | -8.51E-03 | 5.47E-03 | 1.21E-01 | -4.67E-02 | 1.23E-02 | 1.86E-04 | -3.66E-02 | 2.95E-02 | 2.17E-01 |
| X-17765 | 2.95E-03  | 3.43E-03 | 3.91E-01 | 3.39E-03  | 7.90E-03 | 6.68E-01 | -9.09E-03 | 1.85E-02 | 6.24E-01 |
| X-18240 | 1.15E-03  | 3.83E-03 | 7.65E-01 | -4.99E-03 | 8.81E-03 | 5.71E-01 | -1.57E-02 | 2.06E-02 | 4.48E-01 |
| X-18345 | -3.63E-03 | 6.11E-03 | 5.53E-01 | 2.02E-02  | 1.40E-02 | 1.51E-01 | 1.35E-02  | 3.29E-02 | 6.82E-01 |
| X-18779 | -1.59E-03 | 5.96E-03 | 7.89E-01 | -1.20E-02 | 1.37E-02 | 3.82E-01 | -6.32E-02 | 3.19E-02 | 4.88E-02 |
| X-18838 | -4.87E-03 | 4.56E-03 | 2.86E-01 | -2.85E-03 | 1.05E-02 | 7.87E-01 | 1.87E-04  | 2.46E-02 | 9.94E-01 |
| X-18886 | -1.85E-02 | 5.74E-03 | 1.40E-03 | -4.97E-02 | 1.31E-02 | 1.88E-04 | -8.90E-02 | 3.11E-02 | 4.51E-03 |
| X-18887 | -1.25E-02 | 5.80E-03 | 3.24E-02 | -5.51E-03 | 1.35E-02 | 6.82E-01 | -2.45E-02 | 3.15E-02 | 4.37E-01 |
| X-18888 | 3.60E-03  | 5.60E-03 | 5.21E-01 | 1.25E-02  | 1.29E-02 | 3.33E-01 | 1.34E-02  | 3.02E-02 | 6.57E-01 |
| X-18899 | 7.62E-04  | 5.96E-03 | 8.98E-01 | -2.51E-03 | 1.37E-02 | 8.55E-01 | 1.96E-02  | 3.21E-02 | 5.41E-01 |
| X-18901 | 1.53E-02  | 5.25E-03 | 3.94E-03 | 2.06E-02  | 1.22E-02 | 9.28E-02 | 7.39E-02  | 2.84E-02 | 9.73E-03 |
| X-18913 | -2.97E-03 | 6.00E-03 | 6.21E-01 | 1.13E-02  | 1.38E-02 | 4.15E-01 | -7.90E-03 | 3.23E-02 | 8.07E-01 |
| X-18921 | -1.72E-02 | 5.97E-03 | 4.40E-03 | -3.73E-02 | 1.38E-02 | 7.15E-03 | -8.11E-02 | 3.23E-02 | 1.26E-02 |
| X-18922 | -5.85E-03 | 6.06E-03 | 3.35E-01 | -3.24E-02 | 1.38E-02 | 1.99E-02 | 1.93E-02  | 3.27E-02 | 5.56E-01 |
| X-18935 | 1.04E-02  | 5.09E-03 | 4.24E-02 | 1.52E-02  | 1.18E-02 | 1.98E-01 | 4.16E-02  | 2.75E-02 | 1.31E-01 |
| X-19141 | 6.60E-03  | 5.77E-03 | 2.53E-01 | 2.43E-02  | 1.32E-02 | 6.71E-02 | 2.69E-02  | 3.11E-02 | 3.87E-01 |
| X-19183 | 5.53E-03  | 4.55E-03 | 2.25E-01 | -1.29E-03 | 1.05E-02 | 9.02E-01 | 5.25E-02  | 2.44E-02 | 3.22E-02 |
| X-19299 | 6.28E-03  | 5.74E-03 | 2.74E-01 | 1.19E-02  | 1.32E-02 | 3.70E-01 | 4.24E-03  | 3.10E-02 | 8.91E-01 |
| X-19438 | -2.55E-03 | 5.78E-03 | 6.60E-01 | -8.31E-03 | 1.33E-02 | 5.33E-01 | -2.32E-02 | 3.11E-02 | 4.56E-01 |
| X-21258 | 1.02E-02  | 6.18E-03 | 9.91E-02 | 1.65E-02  | 1.43E-02 | 2.50E-01 | 5.45E-02  | 3.33E-02 | 1.03E-01 |
| X-21286 | -5.36E-03 | 5.97E-03 | 3.70E-01 | 2.02E-03  | 1.38E-02 | 8.83E-01 | -2.57E-02 | 3.22E-02 | 4.25E-01 |
| X-21310 | -1.16E-02 | 5.94E-03 | 5.08E-02 | -2.18E-02 | 1.37E-02 | 1.13E-01 | -7.54E-02 | 3.19E-02 | 1.88E-02 |
| X-21312 | -6.33E-04 | 5.66E-03 | 9.11E-01 | -3.59E-03 | 1.30E-02 | 7.83E-01 | 1.06E-02  | 3.05E-02 | 7.27E-01 |
| X-21315 | -2.20E-03 | 3.92E-03 | 5.75E-01 | -2.45E-03 | 9.02E-03 | 7.86E-01 | -1.46E-02 | 2.11E-02 | 4.90E-01 |
| X-21319 | -1.52E-02 | 5.99E-03 | 1.15E-02 | -2.78E-02 | 1.39E-02 | 4.61E-02 | -7.30E-02 | 3.24E-02 | 2.49E-02 |
| X-21339 | -2.58E-02 | 5.88E-03 | 1.57E-05 | -4.25E-02 | 1.38E-02 | 2.18E-03 | -9.98E-02 | 3.22E-02 | 2.14E-03 |
| X-21351 | 4.13E-04  | 6.06E-03 | 9.46E-01 | -1.89E-03 | 1.39E-02 | 8.92E-01 | 1.54E-03  | 3.26E-02 | 9.63E-01 |
| X-21353 | -7.72E-03 | 5.92E-03 | 1.94E-01 | -8.45E-03 | 1.37E-02 | 5.37E-01 | -2.99E-02 | 3.20E-02 | 3.50E-01 |
| X-21364 | -1.76E-02 | 5.46E-03 | 1.40E-03 | -1.79E-02 | 1.28E-02 | 1.62E-01 | -9.47E-02 | 2.94E-02 | 1.44E-03 |
| X-21383 | -1.17E-02 | 5.77E-03 | 4.36E-02 | -3.80E-02 | 1.32E-02 | 4.23E-03 | -4.92E-02 | 3.12E-02 | 1.16E-01 |
| X-21441 | -1.39E-02 | 5.51E-03 | 1.24E-02 | -2.39E-02 | 1.27E-02 | 6.21E-02 | -7.53E-02 | 2.97E-02 | 1.17E-02 |
| X-21442 | 4.73E-03  | 5.29E-03 | 3.72E-01 | -1.31E-02 | 1.22E-02 | 2.82E-01 | 1.50E-03  | 2.85E-02 | 9.58E-01 |
| X-21467 | -1.23E-02 | 5.91E-03 | 3.79E-02 | 1.86E-03  | 1.37E-02 | 8.92E-01 | -4.09E-02 | 3.20E-02 | 2.02E-01 |
| X-21470 | -9.92E-03 | 5.54E-03 | 7.47E-02 | -3.48E-02 | 1.27E-02 | 6.32E-03 | -6.59E-02 | 2.98E-02 | 2.77E-02 |
| X-21471 | -9.41E-03 | 5.60E-03 | 9.41E-02 | 4.29E-03  | 1.30E-02 | 7.41E-01 | -4.72E-02 | 3.02E-02 | 1.20E-01 |
| X-21607 | -2.65E-04 | 5.99E-03 | 9.65E-01 | -4.83E-03 | 1.38E-02 | 7.26E-01 | -2.30E-03 | 3.23E-02 | 9.43E-01 |
| X-21628 | 8.39E-03  | 3.66E-03 | 2.28E-02 | 1.65E-02  | 8.45E-03 | 5.14E-02 | 2.66E-02  | 1.99E-02 | 1.82E-01 |
| X-21661 | 1.14E-02  | 4.48E-03 | 1.12E-02 | 4.31E-03  | 1.04E-02 | 6.80E-01 | 6.76E-02  | 2.41E-02 | 5.29E-03 |
| X-21733 | 1.98E-02  | 5.54E-03 | 4.19E-04 | 5.21E-02  | 1.27E-02 | 5.05E-05 | 4.01E-02  | 3.04E-02 | 1.88E-01 |
| X-21736 | -2.56E-02 | 5.67E-03 | 9.30E-06 | -6.94E-02 | 1.29E-02 | 1.49E-07 | -9.49E-02 | 3.11E-02 | 2.54E-03 |
| X-21740 | -1.54E-02 | 5.21E-03 | 3.29E-03 | -3.53E-02 | 1.20E-02 | 3.50E-03 | -4.84E-02 | 2.84E-02 | 8.86E-02 |
| X-21742 | 3.81E-03  | 5.02E-03 | 4.49E-01 | 5.03E-03  | 1.16E-02 | 6.64E-01 | -1.41E-02 | 2.71E-02 | 6.04E-01 |
| X-21752 | 2.62E-02  | 5.19E-03 | 8.52E-07 | 8.34E-02  | 1.14E-02 | 3.22E-12 | 5.46E-02  | 2.91E-02 | 6.11E-02 |
| X-21788 | -1.00E-02 | 4.98E-03 | 4.50E-02 | -9.45E-03 | 1.15E-02 | 4.13E-01 | -4.31E-02 | 2.69E-02 | 1.10E-01 |
| X-21796 | -8.71E-03 | 5.59E-03 | 1.20E-01 | -1.36E-02 | 1.29E-02 | 2.93E-01 | -2.86E-02 | 3.02E-02 | 3.45E-01 |
| X-21803 | -6.77E-04 | 5.15E-03 | 8.95E-01 | -1.11E-03 | 1.18E-02 | 9.25E-01 | -2.93E-03 | 2.77E-02 | 9.16E-01 |
| X-21807 | 1.03E-02  | 4.55E-03 | 2.51E-02 | 2.57E-02  | 1.05E-02 | 1.47E-02 | 3.29E-02  | 2.47E-02 | 1.84E-01 |
| X-21815 | -4.24E-03 | 4.97E-03 | 3.94E-01 | -2.24E-02 | 1.14E-02 | 5.00E-02 | -4.02E-02 | 2.67E-02 | 1.34E-01 |
| X-21816 | -6.82E-03 | 4.76E-03 | 1.53E-01 | -5.23E-03 | 1.10E-02 | 6.35E-01 | -3.66E-02 | 2.57E-02 | 1.55E-01 |
| X-21821 | 2.26E-02  | 5.19E-03 | 1.79E-05 | 5.01E-02  | 1.20E-02 | 3.76E-05 | 1.02E-01  | 2.82E-02 | 3.80E-04 |
| X-21830 | 6.56E-03  | 4.81E-03 | 1.73E-01 | 1.26E-02  | 1.11E-02 | 2.55E-01 | -3.17E-03 | 2.60E-02 | 9.03E-01 |
| X-21831 | 9.60E-03  | 4.97E-03 | 5.45E-02 | 2.35E-02  | 1.14E-02 | 4.07E-02 | 2.05E-02  | 2.70E-02 | 4.48E-01 |
| X-21834 | 1.29E-02  | 5.93E-03 | 3.09E-02 | 1.53E-02  | 1.37E-02 | 2.66E-01 | 6.59E-02  | 3.20E-02 | 4.02E-02 |
| X-21838 | -4.99E-03 | 3.87E-03 | 1.99E-01 | 2.94E-03  | 8.93E-03 | 7.42E-01 | -1.64E-02 | 2.09E-02 | 4.32E-01 |
| X-21839 | 3.74E-03  | 5.33E-03 | 4.83E-01 | -1.08E-02 | 1.23E-02 | 3.77E-01 | 1.25E-02  | 2.87E-02 | 6.64E-01 |
| X-21840 | 8.51E-03  | 5.27E-03 | 1.07E-01 | 1.38E-02  | 1.22E-02 | 2.57E-01 | 4.19E-02  | 2.84E-02 | 1.41E-01 |
| X-21842 | 2.26E-02  | 4.93E-03 | 6.81E-06 | 5.21E-02  | 1.14E-02 | 6.88E-06 | 9.35E-02  | 2.70E-02 | 6.20E-04 |
| X-21845 | -2.68E-03 | 5.28E-03 | 6.12E-01 | -3.25E-02 | 1.20E-02 | 7.27E-03 | 7.07E-04  | 2.85E-02 | 9.80E-01 |
| X-21851 | -6.93E-03 | 5.22E-03 | 1.85E-01 | -9.32E-03 | 1.20E-02 | 4.40E-01 | -4.83E-02 | 2.81E-02 | 8.62E-02 |
| X-22162 | 1.32E-02  | 5.61E-03 | 1.90E-02 | 2.47E-02  | 1.30E-02 | 5.76E-02 | 8.04E-02  | 3.01E-02 | 8.09E-03 |
| X-22509 | 1.89E-02  | 5.23E-03 | 3.74E-04 | 2.10E-02  | 1.23E-02 | 8.84E-02 | 7.84E-02  | 2.85E-02 | 6.28E-03 |
| X-22771 | -9.83E-03 | 5.87E-03 | 9.51E-02 | -5.03E-02 | 1.32E-02 | 1.80E-04 | -5.22E-02 | 3.16E-02 | 9.98E-02 |
| X-22776 | -8.64E-04 | 5.97E-03 | 8.85E-01 | -1.56E-02 | 1.37E-02 | 2.55E-01 | -4.42E-03 | 3.22E-02 | 8.91E-01 |
| X-22834 | -4.22E-03 | 5.82E-03 | 4.69E-01 | -2.67E-03 | 1.34E-02 | 8.42E-01 | -6.27E-02 | 3.12E-02 | 4.53E-02 |
| X-23276 | 1.33E-03  | 5.52E-03 | 8.09E-01 | -6.46E-03 | 1.27E-02 | 6.11E-01 | -5.94E-03 | 2.97E-02 | 8.42E-01 |
| X-23481 | -2.02E-03 | 5.79E-03 | 7.27E-01 | 2.58E-03  | 1.33E-02 | 8.46E-01 | -3.61E-02 | 3.11E-02 | 2.46E-01 |
| X-23587 | -1.02E-03 | 5.29E-03 | 8.48E-01 | -3.34E-02 | 1.20E-02 | 5.81E-03 | 3.28E-02  | 2.84E-02 | 2.50E-01 |
| X-23593 | -7.53E-04 | 6.00E-03 | 9.00E-01 | 1.57E-02  | 1.38E-02 | 2.55E-01 | 5.08E-03  | 3.23E-02 | 8.75E-01 |
| X-23636 | -4.49E-03 | 6.01E-03 | 4.56E-01 | -2.29E-02 | 1.38E-02 | 9.80E-02 | -6.18E-02 | 3.22E-02 | 5.61E-02 |
| X-23639 | 4.52E-03  | 5.63E-03 | 4.23E-01 | -4.88E-04 | 1.30E-02 | 9.70E-01 | 4.89E-02  | 3.02E-02 | 1.07E-01 |
| X-23641 | 2.24E-03  | 5.33E-03 | 6.75E-01 | -3.88E-04 | 1.23E-02 | 9.75E-01 | -2.54E-02 | 2.87E-02 | 3.76E-01 |
| X-23644 | 1.93E-02  | 5.89E-03 | 1.21E-03 | 5.60E-02  | 1.34E-02 | 3.99E-05 | 7.95E-02  | 3.20E-02 | 1.36E-02 |
| X-23654 | 4.49E-03  | 5.84E-03 | 4.42E-01 | 1.79E-02  | 1.34E-02 | 1.83E-01 | 8.40E-03  | 3.15E-02 | 7.90E-01 |
| X-23659 | 1.87E-02  | 5.36E-03 | 5.64E-04 | 5.06E-02  | 1.22E-02 | 4.72E-05 | 7.87E-02  | 2.92E-02 | 7.35E-03 |
| X-23678 | -7.60E-03 | 5.59E-03 | 1.75E-01 | -1.40E-02 | 1.29E-02 | 2.77E-01 | -2.81E-02 | 3.02E-02 | 3.52E-01 |
| X-23680 | -1.60E-02 | 6.03E-03 | 8.39E-03 | -1.97E-02 | 1.40E-02 | 1.61E-01 | -5.96E-02 | 3.27E-02 | 6.98E-02 |
| X-23739 | -5.48E-04 | 5.70E-03 | 9.24E-01 | -6.65E-03 | 1.31E-02 | 6.13E-01 | -4.88E-06 | 3.07E-02 | 1.00E+00 |
| X-23767 | -1.53E-02 | 4.55E-03 | 8.59E-04 | -1.84E-02 | 1.06E-02 | 8.49E-02 | -2.37E-02 | 2.50E-02 | 3.44E-01 |
| X-23780 | 8.68E-03  | 5.39E-03 | 1.08E-01 | 1.05E-02  | 1.24E-02 | 3.99E-01 | 5.32E-02  | 2.90E-02 | 6.78E-02 |
| X-23782 | 4.64E-03  | 5.44E-03 | 3.95E-01 | 4.61E-04  | 1.25E-02 | 9.71E-01 | 7.97E-02  | 2.90E-02 | 6.36E-03 |
| X-23787 | -1.92E-02 | 5.57E-03 | 6.77E-04 | -3.84E-02 | 1.29E-02 | 3.16E-03 | -8.29E-02 | 3.03E-02 | 6.58E-03 |
| X-23890 | 7.09E-03  | 4.32E-03 | 1.02E-01 | 2.19E-02  | 9.90E-03 | 2.77E-02 | 9.90E-03  | 2.34E-02 | 6.72E-01 |

Supplementary Table 2: Parameter estimates for metabolome-wide association studies for diet-metabolite associations for each of: The Healthy Eating Index-2015 (HEI-15), DASH and AMED diet

|         |           |          |          |           |          |          |           |          |          |
|---------|-----------|----------|----------|-----------|----------|----------|-----------|----------|----------|
| X-23974 | 1.94E-03  | 5.57E-03 | 7.28E-01 | 9.12E-03  | 1.28E-02 | 4.77E-01 | 3.96E-02  | 2.99E-02 | 1.87E-01 |
| X-23997 | 5.71E-03  | 5.86E-03 | 3.31E-01 | 1.34E-02  | 1.35E-02 | 3.23E-01 | 7.38E-03  | 3.17E-02 | 8.16E-01 |
| X-24295 | -7.99E-03 | 5.76E-03 | 1.66E-01 | -1.01E-02 | 1.33E-02 | 4.47E-01 | -3.24E-02 | 3.11E-02 | 2.99E-01 |
| X-24306 | 1.47E-03  | 5.73E-03 | 7.97E-01 | -1.21E-02 | 1.32E-02 | 3.60E-01 | -2.40E-02 | 3.08E-02 | 4.37E-01 |
| X-24307 | -1.31E-03 | 5.86E-03 | 8.24E-01 | -6.90E-03 | 1.35E-02 | 6.09E-01 | -4.21E-02 | 3.15E-02 | 1.81E-01 |
| X-24309 | -1.26E-02 | 5.62E-03 | 2.55E-02 | -1.59E-02 | 1.30E-02 | 2.22E-01 | -7.81E-02 | 3.02E-02 | 1.02E-02 |
| X-24328 | -6.24E-03 | 4.85E-03 | 1.99E-01 | -1.24E-02 | 1.12E-02 | 2.69E-01 | -5.77E-02 | 2.60E-02 | 2.70E-02 |
| X-24334 | -6.78E-03 | 5.27E-03 | 2.00E-01 | 3.75E-04  | 1.22E-02 | 9.75E-01 | -6.95E-02 | 2.82E-02 | 1.44E-02 |
| X-24337 | -1.38E-02 | 5.49E-03 | 1.23E-02 | -1.01E-02 | 1.28E-02 | 4.28E-01 | -9.66E-02 | 2.94E-02 | 1.12E-03 |
| X-24338 | 2.29E-03  | 3.84E-03 | 5.52E-01 | 7.31E-03  | 8.84E-03 | 4.09E-01 | -4.14E-03 | 2.07E-02 | 8.42E-01 |
| X-24344 | -3.57E-03 | 4.54E-03 | 4.33E-01 | -1.46E-02 | 1.04E-02 | 1.62E-01 | -1.50E-02 | 2.45E-02 | 5.41E-01 |
| X-24352 | 1.35E-02  | 5.03E-03 | 7.63E-03 | 8.60E-03  | 1.17E-02 | 4.64E-01 | 3.15E-02  | 2.74E-02 | 2.51E-01 |
| X-24414 | -6.99E-04 | 4.10E-03 | 8.65E-01 | -3.80E-03 | 9.44E-03 | 6.87E-01 | -1.84E-02 | 2.21E-02 | 4.06E-01 |
| X-24418 | 1.01E-02  | 5.76E-03 | 8.20E-02 | -2.59E-03 | 1.33E-02 | 8.46E-01 | 2.99E-02  | 3.12E-02 | 3.38E-01 |
| X-24456 | -5.87E-04 | 5.00E-03 | 9.07E-01 | 1.41E-03  | 1.15E-02 | 9.03E-01 | 3.15E-02  | 2.69E-02 | 2.42E-01 |
| X-24475 | 2.20E-02  | 5.50E-03 | 8.32E-05 | 4.39E-02  | 1.27E-02 | 6.62E-04 | 9.03E-02  | 3.00E-02 | 2.85E-03 |
| X-24494 | 9.06E-03  | 5.87E-03 | 1.24E-01 | 9.47E-04  | 1.36E-02 | 9.44E-01 | 3.91E-02  | 3.17E-02 | 2.19E-01 |
| X-24541 | 1.27E-02  | 5.05E-03 | 1.27E-02 | 1.51E-02  | 1.17E-02 | 1.98E-01 | 7.61E-02  | 2.72E-02 | 5.44E-03 |
| X-24543 | -8.46E-03 | 4.28E-03 | 4.94E-02 | -1.60E-02 | 9.88E-03 | 1.08E-01 | -4.28E-02 | 2.31E-02 | 6.53E-02 |
| X-24544 | -1.61E-02 | 5.36E-03 | 2.85E-02 | -2.48E-02 | 1.24E-02 | 4.73E-02 | -1.06E-01 | 2.86E-02 | 2.53E-04 |
| X-24545 | 9.52E-03  | 5.32E-03 | 7.46E-02 | 6.84E-03  | 1.23E-02 | 5.79E-01 | 1.94E-02  | 2.88E-02 | 5.00E-01 |
| X-24546 | -1.12E-02 | 5.36E-03 | 3.67E-02 | -2.19E-02 | 1.24E-02 | 7.73E-02 | -9.01E-02 | 2.86E-02 | 1.80E-03 |
| X-24556 | -3.94E-04 | 5.74E-03 | 9.45E-01 | 1.72E-02  | 1.32E-02 | 1.91E-01 | 4.32E-02  | 3.08E-02 | 1.62E-01 |
| X-24565 | -7.56E-03 | 5.30E-03 | 1.55E-01 | 9.95E-03  | 1.22E-02 | 4.16E-01 | -4.65E-02 | 2.85E-02 | 1.04E-01 |
| X-24571 | -6.99E-03 | 5.45E-03 | 2.01E-01 | -1.76E-02 | 1.25E-02 | 1.62E-01 | -2.60E-02 | 2.94E-02 | 3.78E-01 |
| X-24576 | 2.70E-03  | 2.83E-03 | 3.42E-01 | 6.73E-03  | 6.51E-03 | 3.02E-01 | 3.48E-03  | 1.53E-02 | 8.20E-01 |
| X-24588 | -1.75E-02 | 5.42E-03 | 1.39E-03 | -3.61E-02 | 1.25E-02 | 4.21E-03 | -6.80E-02 | 2.95E-02 | 2.18E-02 |
| X-24657 | 4.70E-03  | 4.91E-03 | 3.38E-01 | 1.64E-02  | 1.13E-02 | 1.46E-01 | 3.82E-03  | 2.65E-02 | 8.85E-01 |
| X-24736 | 2.26E-02  | 5.18E-03 | 1.86E-05 | 3.52E-02  | 1.21E-02 | 3.97E-03 | 1.05E-01  | 2.82E-02 | 2.43E-04 |
| X-24747 | 4.38E-04  | 5.70E-03 | 9.39E-01 | 1.91E-02  | 1.31E-02 | 1.45E-01 | 1.28E-02  | 3.07E-02 | 6.77E-01 |
| X-24748 | 8.21E-03  | 6.16E-03 | 1.84E-01 | 1.42E-02  | 1.42E-02 | 3.18E-01 | 5.03E-02  | 3.32E-02 | 1.30E-01 |
| X-24757 | 1.41E-02  | 5.25E-03 | 7.86E-03 | 4.06E-02  | 1.20E-02 | 8.17E-04 | 3.50E-02  | 2.86E-02 | 2.22E-01 |
| X-24761 | 1.83E-03  | 3.89E-03 | 6.38E-01 | 6.32E-03  | 8.95E-03 | 4.81E-01 | 1.98E-02  | 2.09E-02 | 3.44E-01 |
| X-24762 | -8.49E-03 | 5.23E-03 | 1.06E-01 | -1.37E-02 | 1.21E-02 | 2.57E-01 | -4.90E-02 | 2.82E-02 | 8.35E-02 |
| X-24947 | -1.44E-02 | 5.40E-03 | 7.92E-03 | -3.14E-02 | 1.24E-02 | 1.21E-02 | -6.16E-02 | 2.92E-02 | 3.62E-02 |
| X-24949 | -1.37E-02 | 5.97E-03 | 2.28E-02 | -3.16E-02 | 1.37E-02 | 2.21E-02 | -2.80E-02 | 3.24E-02 | 3.89E-01 |
| X-24951 | -1.27E-02 | 5.79E-03 | 2.96E-02 | -3.77E-02 | 1.32E-02 | 4.73E-03 | -6.90E-02 | 3.12E-02 | 2.76E-02 |
| X-24953 | -9.23E-03 | 5.63E-03 | 1.02E-01 | -2.31E-02 | 1.30E-02 | 7.50E-02 | -4.72E-02 | 3.04E-02 | 1.21E-01 |
| X-24970 | -1.42E-03 | 5.79E-03 | 8.06E-01 | -9.03E-03 | 1.33E-02 | 4.98E-01 | -2.59E-02 | 3.12E-02 | 4.06E-01 |
| X-24980 | 3.86E-03  | 5.25E-03 | 4.63E-01 | 2.10E-02  | 1.20E-02 | 8.19E-02 | -2.12E-02 | 2.83E-02 | 4.56E-01 |
| X-25009 | -7.12E-03 | 5.97E-03 | 2.34E-01 | 7.09E-03  | 1.38E-02 | 6.07E-01 | 9.84E-04  | 3.23E-02 | 9.76E-01 |
| X-25172 | 4.50E-04  | 6.04E-03 | 9.41E-01 | 2.93E-04  | 1.39E-02 | 9.83E-01 | -1.56E-02 | 3.26E-02 | 6.32E-01 |
| X-25217 | 4.19E-03  | 5.21E-03 | 4.22E-01 | 4.20E-03  | 1.20E-02 | 7.27E-01 | 6.70E-03  | 2.81E-02 | 8.12E-01 |
| X-25247 | 1.32E-03  | 4.80E-03 | 7.84E-01 | 2.04E-02  | 1.10E-02 | 6.40E-02 | 1.51E-02  | 2.59E-02 | 5.60E-01 |
| X-25271 | 1.60E-02  | 5.96E-03 | 7.48E-03 | 3.16E-02  | 1.38E-02 | 2.22E-02 | 3.65E-02  | 3.24E-02 | 2.61E-01 |
| X-25279 | 6.68E-03  | 4.63E-03 | 1.51E-01 | -6.69E-03 | 1.07E-02 | 5.32E-01 | 1.43E-02  | 2.50E-02 | 5.70E-01 |
| X-25343 | -5.62E-03 | 6.00E-03 | 3.50E-01 | -1.63E-02 | 1.38E-02 | 2.38E-01 | -3.61E-02 | 3.23E-02 | 2.66E-01 |
| X-25371 | -7.52E-03 | 5.52E-03 | 1.74E-01 | 1.26E-02  | 1.27E-02 | 3.24E-01 | -8.64E-02 | 2.94E-02 | 3.56E-03 |
| X-25417 | 2.38E-03  | 4.62E-03 | 6.08E-01 | -2.32E-02 | 1.06E-02 | 2.85E-02 | 3.41E-02  | 2.48E-02 | 1.71E-01 |
| X-25419 | 5.24E-03  | 5.27E-03 | 3.21E-01 | -3.12E-02 | 1.20E-02 | 9.91E-03 | 8.13E-02  | 2.81E-02 | 4.05E-03 |
| X-25420 | 1.93E-04  | 5.33E-03 | 9.71E-01 | -2.03E-03 | 1.23E-02 | 8.69E-01 | -1.54E-02 | 2.87E-02 | 5.92E-01 |
| X-25422 | -1.60E-02 | 5.53E-03 | 4.09E-03 | -3.88E-02 | 1.27E-02 | 2.49E-03 | -5.79E-02 | 3.00E-02 | 5.49E-02 |
| X-25433 | -8.69E-03 | 5.47E-03 | 1.13E-01 | -1.65E-02 | 1.26E-02 | 1.93E-01 | -8.55E-02 | 2.92E-02 | 3.62E-03 |
| X-25450 | -2.33E-03 | 4.04E-03 | 5.66E-01 | 8.76E-03  | 9.30E-03 | 3.47E-01 | -1.04E-02 | 2.18E-02 | 6.32E-01 |
| X-25454 | 4.10E-03  | 5.73E-03 | 4.75E-01 | 1.58E-02  | 1.32E-02 | 2.32E-01 | -3.63E-02 | 3.08E-02 | 2.40E-01 |
| X-25457 | -4.43E-03 | 4.88E-03 | 3.65E-01 | 5.83E-03  | 1.13E-02 | 6.05E-01 | 1.10E-02  | 2.64E-02 | 6.78E-01 |
| X-25468 | -4.62E-04 | 3.49E-03 | 8.95E-01 | 1.37E-02  | 7.99E-03 | 8.69E-02 | -1.01E-02 | 1.88E-02 | 5.91E-01 |
| X-25519 | -1.24E-02 | 5.70E-03 | 3.06E-02 | -2.11E-03 | 1.32E-02 | 8.73E-01 | -2.59E-02 | 3.10E-02 | 4.03E-01 |
| X-25520 | 6.37E-03  | 5.73E-03 | 2.67E-01 | 1.20E-02  | 1.32E-02 | 3.65E-01 | 3.28E-02  | 3.09E-02 | 2.89E-01 |
| X-25524 | 1.14E-02  | 4.09E-03 | 5.67E-03 | 2.09E-02  | 9.47E-03 | 2.83E-02 | 4.31E-02  | 2.22E-02 | 5.35E-02 |
| X-25656 | 7.08E-03  | 5.39E-03 | 1.90E-01 | 2.50E-03  | 1.24E-02 | 8.41E-01 | 2.45E-02  | 2.91E-02 | 4.01E-01 |
| X-25790 | 3.09E-03  | 5.39E-03 | 5.67E-01 | 1.24E-02  | 1.24E-02 | 3.19E-01 | 1.57E-02  | 2.91E-02 | 5.90E-01 |
| X-25805 | -2.79E-03 | 4.32E-03 | 5.19E-01 | -6.08E-03 | 9.94E-03 | 5.42E-01 | -2.24E-03 | 2.33E-02 | 9.23E-01 |
| X-25810 | -6.60E-04 | 5.98E-03 | 9.12E-01 | -9.32E-03 | 1.38E-02 | 4.99E-01 | 5.49E-02  | 3.21E-02 | 8.79E-02 |
| X-25937 | -1.40E-02 | 5.24E-03 | 7.91E-03 | -1.84E-02 | 1.22E-02 | 1.30E-01 | -5.73E-02 | 2.84E-02 | 4.43E-02 |
| X-25957 | 1.24E-02  | 5.78E-03 | 3.26E-02 | 2.90E-02  | 1.33E-02 | 3.02E-02 | 7.81E-02  | 3.10E-02 | 1.25E-02 |
| X-25991 | 9.88E-03  | 5.12E-03 | 5.43E-02 | 2.87E-02  | 1.17E-02 | 1.51E-02 | 4.59E-02  | 2.76E-02 | 9.80E-02 |
| X-26054 | -6.54E-05 | 5.87E-03 | 9.91E-01 | 1.17E-02  | 1.35E-02 | 3.85E-01 | -2.84E-03 | 3.16E-02 | 9.29E-01 |
| X-26062 | 5.84E-03  | 5.06E-03 | 2.49E-01 | -5.82E-02 | 1.11E-02 | 3.45E-07 | 3.76E-02  | 2.72E-02 | 1.68E-01 |
| X-26106 | -5.19E-03 | 5.61E-03 | 3.56E-01 | -1.68E-04 | 1.29E-02 | 9.90E-01 | -3.13E-02 | 3.02E-02 | 3.02E-01 |
| X-26107 | -4.85E-03 | 5.60E-03 | 3.87E-01 | -5.35E-03 | 1.29E-02 | 6.79E-01 | -3.22E-02 | 3.02E-02 | 2.86E-01 |
| X-26108 | -8.00E-03 | 5.62E-03 | 1.56E-01 | -1.53E-02 | 1.29E-02 | 2.39E-01 | -4.50E-02 | 3.03E-02 | 1.38E-01 |
| X-26109 | -1.20E-02 | 5.15E-03 | 2.09E-02 | -1.62E-02 | 1.19E-02 | 1.75E-01 | -8.27E-02 | 2.76E-02 | 2.98E-03 |
| X-26111 | -1.83E-02 | 6.11E-03 | 2.95E-03 | -5.91E-02 | 1.38E-02 | 2.61E-05 | -7.72E-02 | 3.31E-02 | 2.05E-02 |
| X-26119 | -3.12E-03 | 5.96E-03 | 6.01E-01 | -1.24E-03 | 1.37E-02 | 9.28E-01 | -3.57E-02 | 3.21E-02 | 2.66E-01 |

Abbreviations : AMED: Mediterranean Style diet, DASH: Dietary Approaches to Stop Hypertension; HEI-15: Healthy eating index (2015)

Note : Metabolite concentrations transformed prior to analysis..

Note : All models controlled for age, sex, race, physical activity, education level, energy intake and smoking status

Supplementary Table 3: Pearson Correlations Between All Metabolites Associated with at Least One Diet Pattern

**Supplementary Table 4:** Parameter estimates for metabolome-wide association studies for diet-metabolite associations for each of: The Healthy Eating Index-2015 (HEI-15), The Dietary Approaches to Stop Hypertension (DASH) and a Mediterranean-style (AMED) diet, controlling for BMI

| Metabolite                                | HEI-15    |          |          | DASH      |          |          | AMED      |          |          |
|-------------------------------------------|-----------|----------|----------|-----------|----------|----------|-----------|----------|----------|
|                                           | Beta      | SE       | P        | Beta      | SE       | P        | Beta      | SE       | P        |
| carnitine                                 | -1.75E-02 | 6.45E-02 | 7.86E-01 | -5.49E-02 | 6.23E-02 | 3.79E-01 | 4.61E-02  | 6.06E-02 | 4.47E-01 |
| 3-phenylpropionate (hydrocinnamate)       | 1.83E-01  | 6.04E-02 | 2.73E-03 | 1.75E-01  | 5.85E-02 | 3.00E-03 | 8.63E-02  | 5.75E-02 | 1.35E-01 |
| phenylacetate                             | 4.75E-02  | 6.61E-02 | 4.73E-01 | 1.43E-01  | 6.34E-02 | 2.46E-02 | 2.54E-02  | 6.22E-02 | 6.84E-01 |
| hippurate                                 | 2.22E-01  | 6.16E-02 | 3.81E-04 | 2.39E-01  | 5.93E-02 | 7.04E-05 | 1.21E-01  | 5.88E-02 | 4.03E-02 |
| xanthurenate                              | 6.26E-02  | 5.81E-02 | 2.83E-01 | 2.68E-02  | 5.64E-02 | 6.34E-01 | -1.16E-03 | 5.48E-02 | 9.83E-01 |
| suberate (C8-DC)                          | 1.64E-02  | 6.39E-02 | 7.98E-01 | 8.12E-02  | 6.16E-02 | 1.89E-01 | 4.31E-02  | 6.00E-02 | 4.73E-01 |
| 3-methyl-2-oxovalerate                    | -3.68E-02 | 5.85E-02 | 5.30E-01 | -3.34E-02 | 5.66E-02 | 5.56E-01 | -1.23E-02 | 5.50E-02 | 8.24E-01 |
| methionine sulfoxide                      | 1.59E-01  | 6.21E-02 | 1.10E-02 | 1.64E-01  | 6.00E-02 | 6.66E-03 | 1.54E-01  | 5.84E-02 | 9.03E-03 |
| 3-methylhistidine                         | -4.31E-02 | 6.66E-02 | 5.18E-01 | -2.34E-02 | 6.45E-02 | 7.18E-01 | -6.68E-02 | 6.25E-02 | 2.86E-01 |
| 4-acetamidophenylglucuronide              | 1.15E-01  | 6.56E-02 | 7.99E-02 | 1.58E-01  | 6.31E-02 | 1.30E-02 | 6.83E-02  | 6.19E-02 | 2.71E-01 |
| 5-hydroxylysine                           | -1.55E-01 | 5.91E-02 | 9.33E-03 | -7.19E-02 | 5.78E-02 | 2.14E-01 | -1.06E-01 | 5.59E-02 | 5.98E-02 |
| 4-guanidinobutanoate                      | 1.66E-01  | 6.08E-02 | 6.60E-03 | 1.36E-01  | 5.90E-02 | 2.19E-02 | 1.31E-01  | 5.73E-02 | 2.32E-02 |
| pinelate (C7-DC)                          | 7.11E-02  | 6.52E-02 | 2.76E-01 | 1.04E-01  | 6.29E-02 | 1.01E-01 | 1.23E-01  | 6.09E-02 | 4.50E-02 |
| glucuronate                               | 5.06E-02  | 6.10E-02 | 4.08E-01 | 5.11E-02  | 5.90E-02 | 3.88E-01 | -2.11E-02 | 5.74E-02 | 7.14E-01 |
| glycerol 3-phosphate                      | -1.26E-03 | 6.52E-02 | 9.85E-01 | -1.20E-02 | 6.31E-02 | 8.49E-01 | 2.09E-02  | 6.13E-02 | 7.33E-01 |
| imidazole lactate                         | -5.13E-02 | 6.21E-02 | 4.09E-01 | -6.46E-02 | 6.00E-02 | 2.83E-01 | 4.76E-02  | 5.84E-02 | 4.15E-01 |
| kynurenine                                | 1.01E-02  | 6.06E-02 | 8.68E-01 | 8.81E-02  | 5.85E-02 | 1.33E-01 | -8.46E-02 | 5.68E-02 | 1.38E-01 |
| glycerophosphorylcholine (GPC)            | 1.11E-01  | 6.41E-02 | 8.52E-02 | 1.96E-02  | 6.24E-02 | 7.54E-01 | 8.53E-02  | 6.04E-02 | 1.59E-01 |
| N-acetylglutamate                         | -1.03E-01 | 5.61E-02 | 6.83E-02 | 1.45E-03  | 5.46E-02 | 9.79E-01 | -1.78E-02 | 5.31E-02 | 7.37E-01 |
| tartarate                                 | 2.52E-01  | 5.66E-02 | 1.18E-05 | 1.63E-01  | 5.58E-02 | 3.78E-03 | 1.71E-01  | 5.41E-02 | 1.79E-03 |
| xanthosine                                | -7.14E-02 | 5.92E-02 | 2.28E-01 | 1.12E-01  | 5.70E-02 | 5.12E-02 | -1.08E-01 | 5.54E-02 | 5.12E-02 |
| ribitol                                   | -3.22E-03 | 6.18E-02 | 9.58E-01 | 3.84E-02  | 5.97E-02 | 5.21E-01 | 2.74E-02  | 5.80E-02 | 6.37E-01 |
| 2-isopropylmalate                         | 1.25E-01  | 6.30E-02 | 4.79E-02 | 2.98E-02  | 6.13E-02 | 6.27E-01 | 1.42E-01  | 5.90E-02 | 1.65E-02 |
| glycodeoxycholate                         | 4.35E-02  | 6.48E-02 | 5.02E-01 | -2.81E-02 | 6.27E-02 | 6.54E-01 | -5.77E-02 | 6.08E-02 | 3.44E-01 |
| theophylline                              | -1.66E-01 | 6.30E-02 | 8.90E-03 | -1.52E-01 | 6.11E-02 | 1.32E-02 | -1.01E-01 | 5.97E-02 | 9.09E-02 |
| quinine                                   | 1.17E-01  | 5.89E-02 | 4.75E-02 | 5.20E-03  | 5.74E-02 | 9.28E-01 | 2.51E-02  | 5.58E-02 | 6.53E-01 |
| theobromine                               | -1.12E-01 | 6.36E-02 | 8.09E-02 | 5.87E-03  | 6.19E-02 | 9.25E-01 | -2.48E-02 | 6.02E-02 | 6.81E-01 |
| gentisate                                 | 1.89E-01  | 6.12E-02 | 2.20E-03 | 1.40E-01  | 5.96E-02 | 1.92E-02 | 7.45E-02  | 5.83E-02 | 2.03E-01 |
| paraxanthine                              | -1.35E-01 | 6.38E-02 | 3.58E-02 | -1.24E-01 | 6.18E-02 | 4.59E-02 | -7.46E-02 | 6.03E-02 | 2.17E-01 |
| indolelactate                             | 6.51E-02  | 5.64E-02 | 2.49E-01 | 3.21E-02  | 5.47E-02 | 5.58E-01 | 5.78E-02  | 5.30E-02 | 2.77E-01 |
| 3-indoxyl sulfate                         | -2.80E-02 | 6.47E-02 | 6.65E-01 | 4.37E-02  | 6.26E-02 | 4.85E-01 | -7.14E-02 | 6.07E-02 | 2.40E-01 |
| gamma-glutamylphenylalanine               | -4.12E-02 | 5.67E-02 | 4.68E-01 | 6.75E-02  | 5.48E-02 | 2.19E-01 | -3.69E-02 | 5.33E-02 | 4.89E-01 |
| 4-methyl-2-oxopentanoate                  | -2.11E-02 | 5.95E-02 | 7.23E-01 | -6.00E-02 | 5.75E-02 | 2.98E-01 | -3.02E-02 | 5.60E-02 | 5.90E-01 |
| 1,5-anhydroglucitol (1,5-AG)              | -1.36E-01 | 5.96E-02 | 2.32E-02 | -4.54E-02 | 5.82E-02 | 4.36E-01 | -8.47E-02 | 5.63E-02 | 1.34E-01 |
| 2-arachidonoylglycerol (20:4)             | 7.64E-02  | 6.46E-02 | 2.38E-01 | 5.69E-03  | 6.27E-02 | 9.28E-01 | 5.85E-02  | 6.08E-02 | 3.37E-01 |
| 1-palmityl-GPC (O-16:0)                   | 7.16E-03  | 6.63E-02 | 9.14E-01 | -4.20E-02 | 6.41E-02 | 5.14E-01 | -4.14E-02 | 6.23E-02 | 5.06E-01 |
| 1-stearoyl-2-arachidonoyl-GPI (18:0/20:4) | -1.11E-02 | 6.49E-02 | 8.64E-01 | -1.09E-01 | 6.24E-02 | 8.13E-02 | 4.10E-02  | 6.09E-02 | 5.01E-01 |
| sphingosine 1-phosphate                   | -6.13E-02 | 6.57E-02 | 3.52E-01 | -4.75E-02 | 6.36E-02 | 4.56E-01 | -3.83E-02 | 6.18E-02 | 5.36E-01 |
| 1-stearoyl-2-oleoyl-GPS (18:0/18:1)       | -1.14E-02 | 6.76E-02 | 8.67E-01 | 4.61E-02  | 6.53E-02 | 4.81E-01 | 4.78E-02  | 6.35E-02 | 4.52E-01 |
| 1-stearoyl-GPI (18:0)                     | 4.72E-02  | 6.25E-02 | 4.51E-01 | -3.29E-02 | 6.06E-02 | 5.88E-01 | 6.34E-02  | 5.87E-02 | 2.82E-01 |
| 1,2-dipalmitoyl-GPC (16:0/16:0)           | -9.67E-02 | 6.52E-02 | 1.39E-01 | -1.73E-01 | 6.25E-02 | 5.96E-03 | -4.92E-02 | 6.15E-02 | 4.24E-01 |
| docosahexaenoate (DHA; 22:6n3)            | -3.61E-03 | 6.30E-02 | 9.54E-01 | -1.03E-01 | 6.06E-02 | 9.08E-02 | 5.82E-02  | 5.91E-02 | 3.25E-01 |
| 1-myristoyl-2-palmitoyl-GPC (14:0/16:0)   | -5.65E-02 | 6.44E-02 | 3.81E-01 | -1.20E-01 | 6.20E-02 | 5.29E-02 | -7.91E-02 | 6.04E-02 | 1.92E-01 |
| alpha-hydroxyisocaproate                  | -2.10E-02 | 5.65E-02 | 7.10E-01 | -7.15E-02 | 5.46E-02 | 1.91E-01 | -8.56E-03 | 5.32E-02 | 8.72E-01 |
| maleate                                   | 7.56E-02  | 5.99E-02 | 2.08E-01 | 2.85E-02  | 5.81E-02 | 6.24E-01 | 1.00E-01  | 5.61E-02 | 7.45E-02 |
| isovalerate (i5:0)                        | -8.15E-02 | 6.11E-02 | 1.83E-01 | -3.53E-02 | 5.93E-02 | 5.53E-01 | -7.10E-02 | 5.75E-02 | 2.18E-01 |
| 4-acetylphenol sulfate                    | 1.93E-01  | 6.27E-02 | 2.31E-03 | 2.61E-01  | 5.96E-02 | 1.74E-05 | 1.14E-01  | 5.95E-02 | 5.59E-02 |
| 2-hydroxyoctanoate                        | 3.53E-02  | 6.68E-02 | 5.97E-01 | 7.04E-02  | 6.45E-02 | 2.77E-01 | -2.73E-02 | 6.28E-02 | 6.64E-01 |
| 2-hydroxyoctanoate                        | -7.53E-02 | 6.18E-02 | 2.24E-01 | -1.23E-02 | 6.00E-02 | 8.38E-01 | -5.72E-02 | 5.82E-02 | 3.26E-01 |
| phenyllactate (PLA)                       | 2.12E-02  | 5.32E-02 | 6.90E-01 | 1.72E-02  | 5.15E-02 | 7.38E-01 | 5.14E-02  | 4.99E-02 | 3.05E-01 |
| palmitoylcarnitine (C16)                  | -2.14E-01 | 6.16E-02 | 6.02E-04 | -2.45E-01 | 5.91E-02 | 4.36E-05 | -1.79E-01 | 5.82E-02 | 2.31E-03 |
| hexanoylcarnitine (C6)                    | -1.56E-01 | 6.42E-02 | 1.54E-02 | -1.68E-01 | 6.20E-02 | 7.14E-03 | -4.33E-02 | 6.09E-02 | 4.77E-01 |
| theanine                                  | 1.36E-01  | 7.23E-02 | 6.20E-02 | 1.19E-01  | 7.01E-02 | 9.00E-02 | 7.37E-02  | 6.83E-02 | 2.82E-01 |
| N-acetylaspartate (NAA)                   | -2.22E-02 | 6.49E-02 | 7.32E-01 | 1.06E-01  | 6.25E-02 | 9.13E-02 | -7.29E-02 | 6.08E-02 | 2.32E-01 |
| dehydroepiandrosterone sulfate (DHEA-S)   | -1.32E-01 | 5.76E-02 | 2.30E-02 | -9.16E-02 | 5.60E-02 | 1.03E-01 | -1.40E-01 | 5.40E-02 | 9.84E-03 |
| acetylcarnitine (C2)                      | -1.31E-03 | 6.45E-02 | 9.84E-01 | -1.33E-03 | 6.25E-02 | 9.83E-01 | 1.52E-02  | 6.07E-02 | 8.02E-01 |
| cysteine s-sulfate                        | -1.79E-01 | 6.34E-02 | 4.95E-03 | -1.50E-01 | 6.15E-02 | 1.51E-02 | -1.80E-01 | 5.94E-02 | 2.68E-03 |
| 1-palmitoylglycerol (16:0)                | -8.24E-03 | 6.61E-02 | 9.01E-01 | -4.61E-02 | 6.40E-02 | 4.72E-01 | -2.88E-02 | 6.22E-02 | 6.43E-01 |
| tartronate (hydroxymalonate)              | 2.85E-01  | 5.55E-02 | 5.38E-07 | 2.60E-01  | 5.40E-02 | 2.33E-06 | 2.04E-01  | 5.32E-02 | 1.55E-04 |
| oxalate (ethanedioate)                    | 2.95E-01  | 5.93E-02 | 1.15E-06 | 2.88E-01  | 5.73E-02 | 9.45E-07 | 2.08E-01  | 5.68E-02 | 3.00E-04 |
| erythritol                                | 4.98E-02  | 6.38E-02 | 4.35E-01 | 7.71E-02  | 6.16E-02 | 2.12E-01 | 2.87E-02  | 6.00E-02 | 6.33E-01 |
| saccharin                                 | -5.90E-02 | 6.43E-02 | 3.59E-01 | -2.68E-02 | 6.23E-02 | 6.67E-01 | -1.15E-01 | 6.01E-02 | 5.60E-02 |
| 3-hydroxymyristate                        | -1.42E-01 | 6.37E-02 | 2.66E-02 | -1.46E-01 | 6.16E-02 | 1.86E-02 | -1.05E-01 | 6.01E-02 | 8.28E-02 |
| iminodiacetate (IDA)                      | -8.12E-02 | 6.72E-02 | 2.28E-01 | -2.21E-02 | 6.52E-02 | 7.35E-01 | -1.12E-01 | 6.30E-02 | 7.68E-02 |
| 1-oleoylglycerol (18:1)                   | 7.77E-02  | 6.48E-02 | 2.31E-01 | 1.92E-02  | 6.28E-02 | 7.60E-01 | -2.71E-03 | 6.10E-02 | 9.65E-01 |
| 3-methyl-2-oxobutyrate                    | -6.70E-02 | 6.22E-02 | 2.83E-01 | -6.53E-02 | 6.02E-02 | 2.79E-01 | -4.26E-02 | 5.86E-02 | 4.67E-01 |
| 1,6-anhydroglucose                        | -8.90E-02 | 5.98E-02 | 1.38E-01 | -5.05E-02 | 5.81E-02 | 3.85E-01 | -6.47E-02 | 5.64E-02 | 2.52E-01 |
| 2-oleoylglycerol (18:1)                   | 8.54E-02  | 6.24E-02 | 1.73E-01 | 2.38E-02  | 6.06E-02 | 6.95E-02 | -1.99E-03 | 5.89E-02 | 9.73E-01 |
| homoarginine                              | 1.10E-01  | 5.87E-02 | 6.22E-02 | 2.68E-02  | 5.71E-02 | 6.39E-01 | 3.44E-02  | 5.55E-02 | 5.36E-01 |
| homocitrulline                            | 6.50E-02  | 6.61E-02 | 3.26E-01 | 1.50E-01  | 6.35E-02 | 1.86E-02 | -7.83E-03 | 6.23E-02 | 9.00E-01 |
| pyroglutamylglutamine                     | 3.94E-02  | 6.10E-02 | 5.63E-01 | 3.37E-02  | 5.91E-02 | 5.69E-01 | -7.85E-02 | 5.72E-02 | 1.71E-01 |
| bradykinin                                | 5.27E-02  | 6.71E-02 | 4.33E-01 | 3.89E-02  | 6.50E-02 | 5.50E-01 | 4.10E-02  | 6.32E-02 | 5.17E-01 |
| glycylproline                             | -7.26E-03 | 6.76E-02 | 9.15E-01 | -2.66E-03 | 6.54E-02 | 9.68E-01 | 2.95E-02  | 6.35E-02 | 6.43E-01 |
| 2-linoleoylglycerol (18:2)                | 7.50E-02  | 6.75E-02 | 2.68E-01 | 4.37E-02  | 6.54E-02 | 5.04E-01 | 1.60E-02  | 6.36E-02 | 8.01E-01 |
| 3-hydroxydecanoate                        | -8.68E-02 | 6.25E-02 | 1.66E-01 | -5.08E-02 | 6.07E-02 | 4.03E-01 | -7.41E-02 | 5.88E-02 | 2.09E-01 |
| citramalate                               | 1.69E-01  | 6.23E-02 | 6.93E-03 | 1.28E-01  | 6.06E-02 | 3.55E-02 | 1.08E-01  | 5.90E-02 | 6.87E-02 |
| EDTA                                      | -7.69E-02 | 6.11E-02 | 2.09E-01 | -1.20E-01 | 5.88E-02 | 4.21E-02 | -1.03E-01 | 5.72E-02 | 7.43E-02 |

Supplementary Table 4: Parameter estimates for metabolome-wide association studies for diet-metabolite associations for each of: HEI-15, DASH and AMED diet, controlling for BMI

|                                                      |           |          |          |           |          |          |           |          |          |
|------------------------------------------------------|-----------|----------|----------|-----------|----------|----------|-----------|----------|----------|
| N-acetylglutamine                                    | -5.68E-02 | 6.13E-02 | 3.55E-01 | -8.59E-02 | 5.92E-02 | 1.48E-01 | -4.80E-03 | 5.77E-02 | 9.34E-01 |
| ribonate                                             | 8.70E-02  | 6.14E-02 | 1.57E-01 | 6.85E-02  | 5.95E-02 | 2.51E-01 | -4.25E-02 | 5.78E-02 | 4.63E-01 |
| threonate                                            | 2.06E-01  | 5.85E-02 | 4.98E-04 | 2.30E-01  | 5.62E-02 | 5.42E-05 | 1.27E-01  | 5.57E-02 | 2.36E-02 |
| galactonate                                          | 6.30E-02  | 6.30E-02 | 3.18E-01 | 6.05E-02  | 6.10E-02 | 3.22E-01 | -4.09E-03 | 5.94E-02 | 9.45E-01 |
| beta-sitosterol                                      | 1.88E-01  | 6.13E-02 | 2.44E-03 | 9.78E-02  | 6.01E-02 | 1.04E-01 | 2.28E-01  | 5.70E-02 | 8.06E-05 |
| indoleacetate                                        | -1.58E-02 | 5.94E-02 | 7.90E-01 | -4.08E-02 | 5.74E-02 | 4.78E-01 | -8.34E-03 | 5.58E-02 | 8.81E-01 |
| 1-linoleoylglycerol (18:2)                           | 7.69E-02  | 6.48E-02 | 2.37E-01 | 5.38E-02  | 6.28E-02 | 3.92E-01 | 1.64E-02  | 6.11E-02 | 7.89E-01 |
| 1-methylhistidine                                    | -2.26E-02 | 6.31E-02 | 7.20E-01 | -4.58E-02 | 6.11E-02 | 4.54E-01 | -2.92E-02 | 5.93E-02 | 6.24E-01 |
| butyrylcarnitine (C4)                                | -8.60E-02 | 6.24E-02 | 1.69E-01 | -9.26E-02 | 6.03E-02 | 1.26E-01 | -7.46E-02 | 5.87E-02 | 2.05E-01 |
| isobutyrylcarnitine (C4)                             | 5.65E-02  | 6.46E-02 | 3.83E-01 | 1.39E-01  | 6.21E-02 | 2.64E-02 | 1.06E-01  | 6.05E-02 | 8.20E-02 |
| glycolithocholate                                    | 1.23E-02  | 6.53E-02 | 8.51E-01 | -2.39E-02 | 6.31E-02 | 7.05E-01 | -1.02E-01 | 6.11E-02 | 9.65E-02 |
| androsterone sulfate                                 | -1.73E-01 | 5.99E-02 | 4.11E-03 | -1.32E-01 | 5.84E-02 | 2.43E-02 | -1.06E-01 | 5.68E-02 | 6.43E-02 |
| indolepropionate                                     | 2.90E-01  | 5.58E-02 | 3.85E-07 | 2.93E-01  | 5.37E-02 | 1.05E-07 | 1.97E-01  | 5.36E-02 | 2.86E-04 |
| N-(2-furoyl)glycine                                  | 8.66E-02  | 6.46E-02 | 1.81E-01 | 3.97E-02  | 6.27E-02 | 5.27E-01 | 2.63E-02  | 6.09E-02 | 6.66E-01 |
| trigonelline (N'-methylnicotinate)                   | 1.24E-01  | 6.08E-02 | 4.25E-02 | 9.51E-02  | 5.90E-02 | 1.09E-01 | 5.86E-02  | 5.75E-02 | 3.09E-01 |
| dodecanedioate (C12-DC)                              | -1.03E-01 | 6.11E-02 | 9.18E-02 | -5.13E-04 | 5.95E-02 | 9.93E-01 | -9.21E-02 | 5.75E-02 | 1.11E-01 |
| N-acetyltyrosine                                     | -7.74E-02 | 5.89E-02 | 1.90E-01 | -8.07E-02 | 5.70E-02 | 1.58E-01 | -4.16E-02 | 5.55E-02 | 4.54E-01 |
| 1,3-dimethylurate                                    | -1.78E-01 | 6.37E-02 | 5.57E-03 | -1.59E-01 | 6.18E-02 | 1.04E-02 | -1.41E-01 | 6.02E-02 | 1.98E-02 |
| 3-methylxanthine                                     | -4.87E-02 | 6.20E-02 | 4.33E-01 | 6.95E-02  | 5.99E-02 | 2.47E-01 | -3.45E-02 | 5.83E-02 | 5.54E-01 |
| 3-hydroxylaurate                                     | -1.36E-01 | 6.19E-02 | 2.93E-02 | -8.67E-02 | 6.02E-02 | 1.51E-01 | -1.03E-01 | 5.84E-02 | 7.96E-02 |
| pyridoxate                                           | 2.31E-01  | 5.92E-02 | 1.20E-04 | 2.45E-01  | 5.69E-02 | 2.37E-05 | 1.15E-01  | 5.67E-02 | 4.41E-02 |
| gamma-glutamylvaline                                 | -1.12E-01 | 6.03E-02 | 6.30E-02 | -5.25E-02 | 5.86E-02 | 3.71E-01 | -1.12E-01 | 5.66E-02 | 4.82E-02 |
| pyroglutamylglycine                                  | 8.78E-02  | 6.46E-02 | 1.75E-01 | 5.59E-02  | 6.26E-02 | 3.73E-01 | 1.09E-01  | 6.06E-02 | 7.22E-02 |
| pyroglutamylvaline                                   | -3.98E-02 | 6.47E-02 | 5.39E-01 | 6.93E-02  | 6.25E-02 | 2.69E-01 | -6.40E-02 | 6.08E-02 | 2.93E-01 |
| 3-hydroxysebacate                                    | -5.10E-03 | 6.36E-02 | 9.36E-01 | 6.26E-02  | 6.14E-02 | 3.09E-01 | -7.95E-03 | 5.98E-02 | 8.94E-01 |
| 5-hydroxyhexanoate                                   | 9.00E-02  | 6.36E-02 | 1.58E-01 | 1.39E-01  | 6.12E-02 | 2.42E-02 | 9.15E-02  | 5.97E-02 | 1.27E-01 |
| propionylglycine                                     | -5.83E-03 | 6.48E-02 | 9.28E-01 | 8.86E-02  | 6.25E-02 | 1.57E-01 | 1.56E-02  | 6.09E-02 | 7.98E-01 |
| butyrylglycine                                       | 7.19E-02  | 6.53E-02 | 2.72E-01 | 5.15E-02  | 6.33E-02 | 4.17E-01 | 5.91E-02  | 6.15E-02 | 3.37E-01 |
| 2-methylbutyrylglycine                               | 1.07E-01  | 6.29E-02 | 8.87E-02 | 9.78E-02  | 6.09E-02 | 1.09E-01 | 6.74E-02  | 5.93E-02 | 2.56E-01 |
| propionylcarnitine (C3)                              | 7.42E-03  | 6.31E-02 | 9.07E-01 | 7.11E-02  | 6.10E-02 | 2.45E-01 | 3.68E-02  | 5.93E-02 | 5.36E-01 |
| pro-hydroxy-pro                                      | -1.84E-01 | 6.35E-02 | 4.04E-03 | -4.85E-02 | 6.23E-02 | 4.37E-01 | -1.01E-01 | 6.03E-02 | 9.64E-02 |
| 3-hydroxy-2-ethylpropionate                          | -1.06E-01 | 6.01E-02 | 7.85E-02 | 2.30E-02  | 5.85E-02 | 6.94E-01 | -1.16E-01 | 5.64E-02 | 4.16E-02 |
| 3-carboxy-4-methyl-5-propyl-2-furanpropanoate (CMPF) | 1.13E-01  | 6.39E-02 | 7.76E-02 | -1.03E-03 | 6.22E-02 | 9.87E-01 | 1.65E-01  | 5.96E-02 | 6.03E-03 |
| docosapentaenoate (n3 DPA; 22:5n3)                   | -1.15E-01 | 6.36E-02 | 7.20E-02 | -1.43E-01 | 6.14E-02 | 2.01E-02 | -5.61E-02 | 6.01E-02 | 3.51E-01 |
| docosadienoate (22:2n6)                              | -1.43E-01 | 6.40E-02 | 2.63E-02 | -1.96E-01 | 6.14E-02 | 1.60E-03 | -1.24E-01 | 6.03E-02 | 4.11E-02 |
| adrenate (22:4n6)                                    | -2.64E-01 | 6.32E-02 | 4.01E-05 | -2.51E-01 | 6.13E-02 | 5.44E-05 | -1.68E-01 | 6.05E-02 | 5.77E-03 |
| 10-undecenoate (11:1n1)                              | -1.46E-01 | 6.24E-02 | 2.00E-02 | -1.68E-01 | 6.01E-02 | 5.51E-03 | -1.83E-01 | 5.82E-02 | 1.79E-03 |
| 4-imidazoleacetate                                   | 1.26E-01  | 6.31E-02 | 4.73E-02 | 1.36E-01  | 6.09E-02 | 2.60E-02 | 1.06E-01  | 5.94E-02 | 7.64E-02 |
| 1-methyl-4-imidazoleacetate                          | -7.49E-02 | 5.97E-02 | 2.10E-01 | -1.22E-02 | 5.79E-02 | 8.33E-01 | -6.25E-02 | 5.61E-02 | 2.67E-01 |
| sebacate (C10-DC)                                    | -9.09E-02 | 6.11E-02 | 1.38E-01 | -3.25E-02 | 5.93E-02 | 5.84E-01 | -1.14E-01 | 5.73E-02 | 4.81E-02 |
| guanidinossuccinate                                  | 1.78E-01  | 6.22E-02 | 4.53E-03 | 1.94E-01  | 6.00E-02 | 1.35E-03 | 1.13E-01  | 5.89E-02 | 5.55E-02 |
| delta-tocopherol                                     | -6.44E-02 | 6.30E-02 | 3.07E-01 | -2.96E-02 | 6.10E-02 | 6.28E-01 | 2.35E-02  | 5.93E-02 | 6.93E-01 |
| l-urobilinogen                                       | -1.45E-01 | 6.46E-02 | 2.54E-02 | -8.24E-02 | 6.29E-02 | 1.92E-01 | 8.20E-03  | 6.13E-02 | 8.94E-01 |
| stearidonate (18:4n3)                                | -9.23E-02 | 6.06E-02 | 1.29E-01 | -1.20E-01 | 5.85E-02 | 4.07E-02 | -1.94E-02 | 5.72E-02 | 7.35E-01 |
| 5-dodecenoate (12:1n7)                               | -1.69E-01 | 5.97E-02 | 5.09E-03 | -1.73E-01 | 5.77E-02 | 2.91E-03 | -8.55E-02 | 5.67E-02 | 1.33E-01 |
| octanoylcarnitine (C8)                               | -1.02E-01 | 6.44E-02 | 1.15E-01 | -1.47E-01 | 6.20E-02 | 1.86E-02 | -1.81E-02 | 6.08E-02 | 7.66E-01 |
| tauro-beta-muricholate                               | 1.03E-01  | 6.43E-02 | 1.10E-01 | 1.03E-01  | 6.22E-02 | 9.83E-02 | 2.74E-03  | 6.07E-02 | 9.64E-01 |
| decanoylcarnitine (C10)                              | -1.09E-01 | 6.49E-02 | 9.33E-02 | -1.45E-01 | 6.25E-02 | 2.11E-02 | -1.98E-02 | 6.13E-02 | 7.46E-01 |
| N-acetylglutamine                                    | -1.50E-01 | 5.93E-02 | 1.21E-02 | -1.24E-01 | 5.76E-02 | 3.25E-02 | -9.40E-02 | 5.61E-02 | 9.51E-02 |
| N-acetyltryptophan                                   | 8.59E-03  | 5.81E-02 | 8.83E-01 | -2.57E-02 | 5.62E-02 | 6.48E-01 | 7.26E-03  | 5.46E-02 | 8.94E-01 |
| N-acetylphenylalanine                                | -1.31E-01 | 5.76E-02 | 2.40E-02 | -1.13E-01 | 5.58E-02 | 4.40E-02 | -6.83E-02 | 5.45E-02 | 2.11E-01 |
| 1-palmitoyl-GPC (16:0)                               | 3.52E-02  | 6.25E-02 | 5.74E-01 | -7.82E-02 | 6.04E-02 | 1.97E-01 | 5.67E-03  | 5.88E-02 | 9.23E-01 |
| 1-margaroyl-GPC (17:0)                               | 1.13E-01  | 6.36E-02 | 7.74E-02 | 1.61E-01  | 6.11E-02 | 8.92E-03 | 2.42E-02  | 6.01E-02 | 6.87E-01 |
| N-acetylarginine                                     | -5.57E-02 | 6.46E-02 | 3.89E-01 | -2.85E-02 | 6.26E-02 | 6.50E-01 | 4.61E-02  | 6.08E-02 | 4.49E-01 |
| piperine                                             | 7.43E-02  | 6.55E-02 | 2.57E-01 | -1.23E-01 | 6.31E-02 | 5.28E-02 | 1.20E-01  | 6.13E-02 | 5.04E-02 |
| campesterol                                          | 3.49E-03  | 6.24E-02 | 9.55E-01 | -9.33E-02 | 6.01E-02 | 1.21E-01 | 1.07E-01  | 5.83E-02 | 6.68E-02 |
| myristoylcarnitine (C14)                             | -2.37E-01 | 6.13E-02 | 1.41E-04 | -1.85E-01 | 5.99E-02 | 2.18E-03 | -1.79E-01 | 5.82E-02 | 2.34E-03 |
| 1-stearoyl-GPC (18:0)                                | 1.04E-01  | 6.38E-02 | 1.04E-01 | 5.35E-02  | 6.19E-02 | 3.88E-01 | 9.12E-02  | 6.00E-02 | 1.29E-01 |
| 1-oleoyl-GPC (18:1)                                  | 1.42E-01  | 5.72E-02 | 1.35E-02 | 6.78E-02  | 5.58E-02 | 2.26E-01 | 1.27E-01  | 5.38E-02 | 1.94E-02 |
| N-acetylthreonine                                    | 4.42E-04  | 6.15E-02 | 9.94E-01 | 1.14E-01  | 5.91E-02 | 5.43E-02 | -4.80E-03 | 5.78E-02 | 9.34E-01 |
| N-acetylisoleucine                                   | -3.84E-02 | 6.37E-02 | 5.47E-01 | -4.74E-02 | 6.16E-02 | 4.42E-01 | 2.45E-02  | 5.99E-02 | 6.83E-01 |
| 10-nonadecenoate (19:1n9)                            | -2.23E-01 | 6.08E-02 | 3.00E-04 | -2.32E-01 | 5.86E-02 | 9.67E-05 | -1.97E-01 | 5.73E-02 | 6.73E-04 |
| 10-heptadecenoate (17:1n7)                           | -2.45E-01 | 5.80E-02 | 3.28E-05 | -2.44E-01 | 5.60E-02 | 1.89E-05 | -1.95E-01 | 5.50E-02 | 4.49E-04 |
| hyocholate                                           | -1.46E-01 | 6.33E-02 | 2.22E-02 | -8.04E-02 | 6.17E-02 | 1.94E-01 | 2.15E-02  | 6.01E-02 | 7.20E-01 |
| HWESASLLR                                            | 2.76E-02  | 6.45E-02 | 6.70E-01 | 5.19E-02  | 6.24E-02 | 4.06E-01 | -6.04E-03 | 6.07E-02 | 9.21E-01 |
| epiandrosterone sulfate                              | -1.30E-01 | 5.79E-02 | 2.51E-02 | -1.02E-01 | 5.62E-02 | 7.16E-02 | -8.21E-02 | 5.47E-02 | 1.34E-01 |
| bradykinin, des-arg(9)                               | 5.27E-02  | 6.76E-02 | 4.37E-01 | 7.96E-02  | 6.54E-02 | 2.24E-01 | 3.31E-02  | 6.36E-02 | 6.03E-01 |
| N-acetylhistidine                                    | -9.05E-02 | 6.31E-02 | 1.52E-01 | -2.55E-02 | 6.13E-02 | 6.77E-01 | -5.16E-02 | 5.94E-02 | 3.86E-01 |
| gamma-glutamylglycine                                | -6.95E-02 | 6.53E-02 | 2.88E-01 | 1.15E-02  | 6.33E-02 | 8.56E-01 | -5.65E-02 | 6.14E-02 | 3.58E-01 |
| gamma-glutamyltryptophan                             | 2.56E-02  | 6.09E-02 | 6.74E-01 | 4.90E-02  | 5.89E-02 | 4.06E-01 | 5.49E-02  | 5.72E-02 | 3.38E-01 |
| stachydrine                                          | 1.99E-01  | 6.54E-02 | 2.54E-03 | 2.17E-01  | 6.30E-02 | 6.46E-04 | 1.78E-01  | 6.15E-02 | 4.07E-03 |
| alpha-hydroxyisovalerate                             | -4.13E-02 | 5.95E-02 | 4.88E-01 | -1.59E-01 | 5.69E-02 | 5.52E-03 | 7.72E-02  | 5.58E-02 | 1.67E-01 |
| hydroxybupropion                                     | 5.28E-02  | 6.77E-02 | 4.36E-01 | 1.19E-01  | 6.52E-02 | 6.90E-02 | -5.40E-02 | 6.37E-02 | 3.97E-01 |
| gamma-glutamylmethionine                             | -6.94E-02 | 5.94E-02 | 2.44E-01 | -2.22E-02 | 5.76E-02 | 7.00E-01 | -7.02E-02 | 5.58E-02 | 2.10E-01 |
| gamma-glutamylthreonine                              | -1.62E-01 | 6.48E-02 | 1.28E-02 | -9.87E-02 | 6.31E-02 | 1.19E-01 | -6.95E-02 | 6.14E-02 | 2.59E-01 |
| p-cresol sulfate                                     | 2.68E-02  | 6.49E-02 | 6.80E-01 | 1.11E-01  | 6.25E-02 | 7.66E-02 | -6.43E-02 | 6.09E-02 | 2.92E-01 |
| erythronate*                                         | 8.96E-02  | 6.27E-02 | 1.54E-01 | 1.65E-01  | 6.01E-02 | 6.59E-03 | 9.61E-02  | 5.89E-02 | 1.04E-01 |
| Fibrinopeptide A*                                    | 7.53E-02  | 6.67E-02 | 2.60E-01 | 5.10E-02  | 6.46E-02 | 4.31E-01 | 2.83E-02  | 6.28E-02 | 6.52E-01 |
| Fibrinopeptide A, des-ala(1)*                        | 9.07E-02  | 6.61E-02 | 1.72E-01 | 6.41E-02  | 6.41E-02 | 3.19E-01 | 4.98E-02  | 6.23E-02 | 4.25E-01 |
| Fibrinopeptide A, phosphono-ser(3)*                  | 3.87E-02  | 6.72E-02 | 5.66E-01 | 3.93E-02  | 6.50E-02 | 5.47E-01 | 2.32E-02  | 6.32E-02 | 7.14E-01 |
| XHWESASXXX*                                          | 8.74E-02  | 6.69E-02 | 1.92E-01 | 1.03E-01  | 6.46E-02 | 1.14E-01 | 4.26E-02  | 6.30E-02 | 4.99E-01 |
| HWESASXXX*                                           | 1.12E-01  | 6.60E-02 | 9.05E-02 | 1.05E-01  | 6.39E-02 | 1.02E-01 | 7.35E-02  | 6.22E-02 | 2.38E-01 |

Supplementary Table 4: Parameter estimates for metabolome-wide association studies for diet-metabolite associations for each of: HEI-15, DASH and AMED diet, controlling for BMI

|                                                 |           |          |          |           |          |          |           |          |          |
|-------------------------------------------------|-----------|----------|----------|-----------|----------|----------|-----------|----------|----------|
| HXGXA*                                          | 1.20E-01  | 6.82E-02 | 8.03E-02 | 9.77E-02  | 6.61E-02 | 1.41E-01 | 5.78E-02  | 6.44E-02 | 3.70E-01 |
| salicyluric glucuronide*                        | 1.19E-01  | 6.44E-02 | 6.66E-02 | 1.43E-01  | 6.21E-02 | 2.16E-02 | 1.21E-02  | 6.09E-02 | 8.43E-01 |
| eicosenoate (20:1)                              | -9.60E-02 | 6.20E-02 | 1.23E-01 | -1.25E-01 | 5.98E-02 | 3.82E-02 | -6.83E-02 | 5.84E-02 | 2.43E-01 |
| linolenate [alpha or gamma; (18:3n3 or 6)]      | -9.94E-02 | 5.97E-02 | 9.69E-02 | -9.00E-02 | 5.78E-02 | 1.21E-01 | -4.89E-02 | 5.63E-02 | 3.86E-01 |
| aconitate [cis or trans]                        | -1.13E-01 | 5.76E-02 | 5.08E-02 | -2.95E-03 | 5.61E-02 | 9.58E-01 | -7.86E-02 | 5.43E-02 | 1.49E-01 |
| 1-myristoyl-GPC (14:0)                          | 1.80E-02  | 6.24E-02 | 7.74E-01 | -3.61E-02 | 6.04E-02 | 5.50E-01 | -4.41E-02 | 5.86E-02 | 4.52E-01 |
| 1-arachidoyl-GPC (20:0)                         | 3.15E-01  | 5.72E-02 | 8.35E-08 | 2.33E-01  | 5.66E-02 | 5.03E-05 | 2.79E-01  | 5.41E-02 | 4.64E-07 |
| metoprolol acid metabolite*                     | 5.33E-02  | 6.64E-02 | 4.23E-01 | 1.14E-01  | 6.40E-02 | 7.69E-02 | 6.40E-02  | 6.23E-02 | 1.79E-01 |
| heme                                            | 3.12E-02  | 6.42E-02 | 6.27E-01 | 1.29E-02  | 6.21E-02 | 8.36E-01 | 2.82E-02  | 6.03E-02 | 6.40E-01 |
| stearoylcarnitine (C18)                         | -1.35E-01 | 6.16E-02 | 2.94E-02 | -8.71E-02 | 5.99E-02 | 1.48E-01 | -6.94E-02 | 5.83E-02 | 2.35E-01 |
| laurylcarnitine (C12)                           | -1.75E-01 | 6.34E-02 | 6.26E-03 | -1.90E-01 | 6.11E-02 | 2.07E-03 | -9.83E-02 | 6.01E-02 | 1.03E-01 |
| isovalerylcarnitine (C5)                        | -1.07E-01 | 6.47E-02 | 9.89E-02 | -4.69E-02 | 6.28E-02 | 4.56E-01 | -5.03E-02 | 6.10E-02 | 4.11E-01 |
| 1-linoleoyl-GPC (18:2)                          | 6.72E-02  | 5.89E-02 | 2.55E-01 | 7.57E-02  | 5.69E-02 | 1.85E-01 | 9.41E-02  | 5.52E-02 | 8.93E-02 |
| 7-methylxanthine                                | -3.86E-02 | 6.38E-02 | 5.46E-01 | 9.91E-02  | 6.15E-02 | 1.08E-01 | -2.63E-02 | 6.00E-02 | 6.62E-01 |
| 1,3,7-trimethylurate                            | -1.36E-01 | 6.33E-02 | 3.27E-02 | -1.20E-01 | 6.13E-02 | 5.22E-02 | -1.01E-01 | 5.97E-02 | 9.25E-02 |
| 3,7-dimethylurate                               | -4.42E-02 | 6.35E-02 | 4.87E-01 | 5.73E-02  | 6.14E-02 | 3.52E-01 | -1.68E-02 | 5.98E-02 | 7.79E-01 |
| 1,7-dimethylurate                               | -1.51E-01 | 6.30E-02 | 1.71E-02 | -1.07E-01 | 6.12E-02 | 8.15E-02 | -1.02E-01 | 5.95E-02 | 8.64E-02 |
| 1-methylurate                                   | -6.31E-02 | 6.35E-02 | 3.21E-01 | -4.14E-02 | 6.15E-02 | 5.02E-01 | -3.96E-02 | 5.97E-02 | 5.08E-01 |
| 5-acetyl-amino-6-formyl-amino-3-methyluracil    | -7.83E-02 | 6.45E-02 | 2.26E-01 | -8.30E-02 | 6.24E-02 | 1.85E-01 | -1.08E-01 | 6.05E-02 | 7.62E-02 |
| 5-acetyl-amino-6-amino-3-methyluracil           | -1.05E-01 | 6.34E-02 | 1.00E-01 | -4.98E-02 | 6.16E-02 | 4.20E-01 | -9.26E-02 | 5.97E-02 | 1.22E-01 |
| indolebutyrate                                  | 2.46E-02  | 6.13E-02 | 6.88E-01 | 1.59E-01  | 5.86E-02 | 7.12E-03 | -4.05E-02 | 5.76E-02 | 4.83E-01 |
| 1-methylxanthine                                | -1.24E-01 | 6.37E-02 | 5.36E-02 | -9.11E-02 | 6.18E-02 | 1.42E-01 | -6.88E-02 | 6.02E-02 | 2.54E-01 |
| N1-methylinosine                                | -5.69E-02 | 6.31E-02 | 3.68E-01 | 5.81E-02  | 6.11E-02 | 3.43E-01 | -1.01E-01 | 5.91E-02 | 8.86E-02 |
| N2,N2-dimethylguanosine                         | -7.32E-02 | 5.93E-02 | 2.18E-01 | 1.14E-02  | 5.75E-02 | 8.43E-01 | -1.21E-01 | 5.54E-02 | 2.94E-02 |
| N4-acetylcytidine                               | -1.08E-01 | 5.99E-02 | 7.36E-02 | -2.58E-02 | 5.83E-02 | 6.59E-01 | -8.39E-02 | 5.65E-02 | 1.38E-01 |
| N6-carbamoylthreonyl-adenosine                  | -5.81E-02 | 5.78E-02 | 3.16E-01 | 2.85E-02  | 5.60E-02 | 6.11E-01 | -1.10E-01 | 5.40E-02 | 4.24E-02 |
| orotidine                                       | -1.04E-01 | 5.68E-02 | 6.68E-02 | -2.13E-02 | 5.53E-02 | 7.01E-01 | -9.71E-02 | 5.34E-02 | 7.00E-02 |
| phenylacetylglutamine                           | 3.22E-02  | 6.59E-02 | 6.26E-01 | 1.35E-01  | 6.33E-02 | 3.36E-02 | -1.55E-03 | 6.20E-02 | 9.80E-01 |
| 4-hydroxyhippurate                              | -3.33E-02 | 6.57E-02 | 6.12E-01 | 7.47E-02  | 6.34E-02 | 2.40E-01 | 3.13E-02  | 6.17E-02 | 6.12E-01 |
| 5,6-dihydrouridine                              | -4.96E-02 | 6.03E-02 | 4.12E-01 | 1.85E-02  | 5.85E-02 | 7.52E-01 | -5.51E-02 | 5.67E-02 | 3.32E-01 |
| 3-(3-amino-3-carboxypropyl)uridine*             | -4.13E-02 | 6.07E-02 | 4.97E-01 | -1.98E-02 | 5.88E-02 | 7.36E-01 | -1.03E-01 | 5.68E-02 | 7.07E-02 |
| 1-arachidonoylglycerol (20:4)                   | -3.28E-02 | 5.89E-02 | 5.78E-01 | -9.12E-02 | 5.67E-02 | 1.09E-01 | -1.47E-02 | 5.54E-02 | 7.91E-01 |
| 1-linolenoylglycerol (18:3)                     | 1.59E-01  | 6.42E-02 | 1.36E-02 | 8.53E-02  | 6.26E-02 | 1.74E-01 | 1.06E-01  | 6.07E-02 | 8.18E-02 |
| cysteine-glutathione disulfide                  | -1.71E-02 | 6.54E-02 | 7.94E-01 | 4.71E-04  | 6.33E-02 | 9.94E-01 | -4.37E-02 | 6.14E-02 | 4.78E-01 |
| 5-methyluridine (ribothymidine)                 | -1.05E-01 | 6.46E-02 | 1.05E-01 | -1.93E-02 | 6.28E-02 | 7.59E-01 | -9.87E-02 | 6.07E-02 | 1.05E-01 |
| isovalerylglycine                               | 7.66E-02  | 6.27E-02 | 2.23E-01 | 1.61E-01  | 6.01E-02 | 7.84E-03 | 7.45E-02  | 5.90E-02 | 2.07E-01 |
| 3-hydroxydodecanedioate*                        | -4.53E-02 | 6.15E-02 | 4.62E-01 | -2.20E-02 | 5.96E-02 | 7.12E-01 | -1.46E-02 | 5.79E-02 | 8.01E-01 |
| 7-methylguanine                                 | -8.57E-02 | 6.35E-02 | 1.78E-01 | -4.48E-02 | 6.16E-02 | 4.67E-01 | -8.60E-02 | 5.97E-02 | 1.51E-01 |
| 1-stearoyl-GPE (18:0)                           | 5.72E-02  | 6.24E-02 | 3.60E-01 | -2.61E-03 | 6.05E-02 | 9.66E-01 | 7.15E-02  | 5.86E-02 | 2.24E-01 |
| 1-stearoyl-GPG (18:0)                           | -4.95E-02 | 6.42E-02 | 4.41E-01 | -4.87E-02 | 6.21E-02 | 4.33E-01 | -1.09E-01 | 6.01E-02 | 7.00E-02 |
| N1-Methyl-2-pyridone-5-carboxamide              | 1.33E-02  | 6.38E-02 | 8.35E-01 | 1.12E-01  | 6.13E-02 | 6.86E-02 | -3.23E-02 | 5.99E-02 | 5.90E-01 |
| mead acid (20:3n9)                              | -8.53E-02 | 6.59E-02 | 1.97E-01 | -1.29E-01 | 6.35E-02 | 4.34E-02 | -1.06E-01 | 6.18E-02 | 8.64E-02 |
| gamma-glutamylisoleucine*                       | -5.05E-02 | 5.78E-02 | 3.83E-01 | 3.72E-02  | 5.60E-02 | 5.07E-01 | -3.57E-02 | 5.44E-02 | 5.12E-01 |
| oleoylcarnitine (C18:1)                         | -3.57E-02 | 6.15E-02 | 5.62E-01 | -1.06E-01 | 5.93E-02 | 7.45E-02 | -1.70E-02 | 5.79E-02 | 7.69E-01 |
| 2-methylbutyrylcarnitine (C5)                   | 3.40E-02  | 6.52E-02 | 6.02E-01 | 7.76E-02  | 6.30E-02 | 2.19E-01 | 2.47E-02  | 6.14E-02 | 6.88E-01 |
| phenol sulfate                                  | -1.54E-02 | 6.37E-02 | 8.09E-01 | 2.59E-02  | 6.17E-02 | 6.75E-01 | 3.75E-02  | 5.99E-02 | 5.32E-01 |
| 1-palmitoleoyl-GPC (16:1)*                      | 2.68E-03  | 6.18E-02 | 9.65E-01 | -1.03E-01 | 5.95E-02 | 8.52E-02 | -3.34E-02 | 5.81E-02 | 5.66E-01 |
| hexanoylglycine                                 | -4.41E-02 | 6.51E-02 | 4.98E-01 | -1.05E-01 | 6.27E-02 | 9.39E-02 | -5.02E-02 | 6.11E-02 | 4.12E-01 |
| glutamine_degradant*                            | 3.58E-02  | 5.35E-02 | 5.04E-01 | 9.37E-02  | 5.15E-02 | 7.01E-02 | 9.98E-03  | 5.04E-02 | 8.43E-01 |
| 2-hydroxy-3-methylvalerate                      | 1.23E-02  | 5.56E-02 | 8.25E-01 | -1.03E-01 | 5.35E-02 | 5.46E-02 | 1.16E-01  | 5.18E-02 | 2.58E-02 |
| homostachydrine*                                | 5.48E-02  | 6.39E-02 | 3.92E-01 | 5.18E-02  | 6.19E-02 | 4.03E-01 | -3.44E-02 | 6.01E-02 | 5.67E-01 |
| 1-arachidonoyl-GPC (20:4n6)*                    | -3.96E-02 | 6.51E-02 | 5.43E-01 | -7.90E-02 | 6.29E-02 | 2.10E-01 | -1.12E-02 | 6.12E-02 | 8.55E-01 |
| 1-dihomo-linolenoyl-GPC (20:3n3 or 6)*          | 1.18E-01  | 6.14E-02 | 5.61E-02 | 6.33E-02  | 5.97E-02 | 2.90E-01 | 1.30E-02  | 5.81E-02 | 8.23E-01 |
| 1-dihomo-linoleoyl-GPC (20:2)*                  | 1.86E-01  | 6.00E-02 | 2.16E-03 | 1.04E-01  | 5.87E-02 | 7.61E-02 | 1.39E-01  | 5.67E-02 | 1.52E-02 |
| 2-arachidonoyl-GPC (20:4)*                      | -4.02E-02 | 6.63E-02 | 5.45E-01 | -1.00E-01 | 6.39E-02 | 1.17E-01 | -2.77E-02 | 6.23E-02 | 6.57E-01 |
| 2-oleoyl-GPC (18:1)*                            | 6.94E-02  | 6.06E-02 | 2.53E-01 | -1.12E-03 | 5.88E-02 | 9.85E-01 | 6.48E-02  | 5.70E-02 | 2.56E-01 |
| 2-linoleoyl-GPC (18:2)*                         | 6.87E-03  | 6.18E-02 | 9.11E-01 | 4.62E-02  | 5.97E-02 | 4.40E-01 | 3.29E-02  | 5.80E-02 | 5.71E-01 |
| 2-palmitoleoyl-GPC (16:1)*                      | -3.70E-02 | 6.25E-02 | 5.54E-01 | -1.13E-01 | 6.02E-02 | 6.10E-02 | -5.04E-02 | 5.88E-02 | 3.92E-01 |
| 2-palmitoyl-GPC (16:0)*                         | -6.08E-04 | 6.33E-02 | 9.92E-01 | -9.51E-02 | 6.10E-02 | 1.20E-01 | -4.23E-02 | 5.95E-02 | 4.78E-01 |
| 2-myristoyl-GPC (14:0)*                         | 4.71E-02  | 6.28E-02 | 4.54E-01 | -2.19E-02 | 6.09E-02 | 7.19E-01 | -2.76E-02 | 5.91E-02 | 6.41E-01 |
| 1-docosahexaenoyl-GPC (22:6)*                   | 1.27E-01  | 6.19E-02 | 4.16E-02 | 9.99E-03  | 6.03E-02 | 8.69E-01 | 1.78E-01  | 5.76E-02 | 2.19E-03 |
| 1-palmitoyl-GPE (16:0)                          | 2.76E-02  | 6.34E-02 | 6.64E-01 | -7.41E-02 | 6.12E-02 | 2.27E-01 | 2.70E-02  | 5.96E-02 | 6.51E-01 |
| 1-oleoyl-GPE (18:1)                             | 1.12E-01  | 6.10E-02 | 6.64E-02 | 1.13E-01  | 5.91E-02 | 5.77E-02 | 1.17E-01  | 5.73E-02 | 4.20E-02 |
| 1-linoleoyl-GPE (18:2)*                         | 5.28E-03  | 6.20E-02 | 9.32E-01 | 4.02E-02  | 6.00E-02 | 5.03E-01 | 1.79E-02  | 5.83E-02 | 7.60E-01 |
| 1-arachidonoyl-GPE (20:4n6)*                    | -1.11E-01 | 6.39E-02 | 8.25E-02 | -1.43E-01 | 6.16E-02 | 2.14E-02 | -6.30E-02 | 6.03E-02 | 2.97E-01 |
| N-acetylcitrulline                              | -7.67E-02 | 5.60E-02 | 1.72E-01 | 4.67E-03  | 5.43E-02 | 9.32E-01 | -2.86E-02 | 5.28E-02 | 5.88E-01 |
| 2-hydroxypalmitate                              | -1.11E-01 | 6.29E-02 | 7.74E-02 | -1.17E-01 | 6.08E-02 | 5.54E-02 | -1.09E-01 | 5.91E-02 | 6.72E-02 |
| docosapentaenoate (n6 DPA; 22:5n6)              | -1.97E-01 | 6.51E-02 | 2.74E-03 | -2.41E-01 | 6.24E-02 | 1.36E-04 | -1.97E-01 | 6.11E-02 | 1.39E-03 |
| gulonate*                                       | 7.35E-02  | 6.27E-02 | 2.42E-01 | 9.51E-02  | 6.06E-02 | 1.18E-01 | -6.96E-03 | 5.91E-02 | 9.06E-01 |
| isobutyrylglycine                               | 7.61E-02  | 6.39E-02 | 2.35E-01 | 1.21E-01  | 6.16E-02 | 5.09E-02 | 4.95E-02  | 6.01E-02 | 4.11E-01 |
| glutaryl carnitine (C5-DC)                      | -7.12E-02 | 6.40E-02 | 2.67E-01 | -9.33E-02 | 6.18E-02 | 1.32E-01 | 2.48E-02  | 6.02E-02 | 6.81E-01 |
| 2-methylmalonylcarnitine (C4-DC)                | -5.92E-03 | 6.52E-02 | 9.28E-01 | 4.16E-02  | 6.30E-02 | 5.10E-01 | -5.98E-02 | 6.12E-02 | 3.29E-01 |
| tiglyl carnitine (C5:1-DC)                      | 3.39E-02  | 6.21E-02 | 5.86E-01 | 1.12E-01  | 5.98E-02 | 6.20E-02 | -3.19E-02 | 5.84E-02 | 5.85E-01 |
| hydroquinone sulfate                            | 9.34E-02  | 6.72E-02 | 1.66E-01 | 1.59E-01  | 6.46E-02 | 1.44E-02 | 1.08E-01  | 6.31E-02 | 8.83E-02 |
| catechol sulfate                                | 3.18E-01  | 5.59E-02 | 3.04E-08 | 2.73E-01  | 5.48E-02 | 1.10E-06 | 2.14E-01  | 5.40E-02 | 9.31E-05 |
| cholesterol sulfate                             | 3.32E-02  | 6.12E-02 | 5.88E-01 | -5.56E-02 | 5.91E-02 | 3.48E-01 | 6.60E-02  | 5.74E-02 | 2.51E-01 |
| 7-alpha-hydroxy-3-oxo-4-cholestenolate (7-Hoca) | -1.10E-01 | 6.32E-02 | 8.40E-02 | -6.89E-02 | 6.14E-02 | 2.63E-01 | -5.29E-02 | 5.97E-02 | 3.76E-01 |
| tetradecanedioate (C14-DC)                      | -1.19E-01 | 5.95E-02 | 4.56E-02 | -1.48E-01 | 5.73E-02 | 1.03E-02 | -1.20E-01 | 5.59E-02 | 3.24E-02 |
| hexadecanedioate (C16-DC)                       | -1.56E-01 | 6.02E-02 | 1.02E-02 | -1.51E-01 | 5.83E-02 | 1.03E-02 | -1.15E-01 | 5.69E-02 | 4.46E-02 |
| octadecanedioate (C18-DC)                       | -9.58E-02 | 6.34E-02 | 1.32E-01 | -3.52E-02 | 6.16E-02 | 5.68E-01 | -5.32E-02 | 5.97E-02 | 3.74E-01 |
| undecanedioate (C11-DC)                         | 1.92E-02  | 6.62E-02 | 7.72E-01 | 1.23E-02  | 6.41E-02 | 8.48E-01 | 2.10E-02  | 6.22E-02 | 7.36E-01 |
| glycerophosphoethanolamine                      | 3.35E-02  | 6.36E-02 | 5.98E-01 | 3.23E-03  | 6.16E-02 | 9.58E-01 | 6.76E-02  | 5.97E-02 | 2.59E-01 |

Supplementary Table 4: Parameter estimates for metabolome-wide association studies for diet-metabolite associations for each of: HEI-15, DASH and AMED diet, controlling for BMI

|                                                     |           |          |          |           |          |          |           |          |          |
|-----------------------------------------------------|-----------|----------|----------|-----------|----------|----------|-----------|----------|----------|
| 3-(3-hydroxyphenyl)propionate                       | 1.07E-01  | 6.53E-02 | 1.04E-01 | 1.39E-01  | 6.29E-02 | 2.78E-02 | 1.36E-01  | 6.11E-02 | 2.69E-02 |
| ectoine                                             | 4.53E-02  | 6.48E-02 | 4.85E-01 | 7.49E-02  | 6.26E-02 | 2.32E-01 | -1.22E-02 | 6.09E-02 | 8.41E-01 |
| 2-oleoyl-GPE (18:1)*                                | 8.23E-02  | 6.21E-02 | 1.86E-01 | 1.08E-01  | 6.00E-02 | 7.41E-02 | 7.99E-02  | 5.84E-02 | 1.73E-01 |
| 2-palmitoyl-GPE (16:0)*                             | -3.68E-03 | 6.43E-02 | 9.54E-01 | -1.15E-01 | 6.19E-02 | 6.36E-02 | 2.63E-03  | 6.05E-02 | 9.65E-01 |
| 1-arachidonoyl-GPI (20:4)*                          | -1.17E-01 | 6.52E-02 | 7.26E-02 | -2.31E-01 | 6.19E-02 | 2.27E-04 | -9.17E-02 | 6.14E-02 | 1.37E-01 |
| 1-palmitoyl-GPI (16:0)                              | 2.23E-02  | 6.43E-02 | 7.29E-01 | -3.95E-02 | 6.22E-02 | 5.26E-01 | -2.40E-02 | 6.05E-02 | 6.92E-01 |
| glycolithocholate sulfate*                          | 6.65E-02  | 6.29E-02 | 2.91E-01 | 5.04E-02  | 6.09E-02 | 4.09E-01 | -7.31E-02 | 5.91E-02 | 2.17E-01 |
| tauroolithocholate 3-sulfate                        | 6.40E-02  | 6.46E-02 | 3.23E-01 | 5.06E-02  | 6.25E-02 | 4.19E-01 | -1.09E-01 | 6.05E-02 | 7.31E-02 |
| deoxycarnitine                                      | -9.70E-02 | 6.19E-02 | 1.18E-01 | 2.56E-02  | 6.01E-02 | 6.70E-01 | -5.15E-02 | 5.83E-02 | 3.78E-01 |
| N6-succinyladenosine                                | -2.77E-02 | 6.01E-02 | 6.45E-01 | -2.15E-02 | 5.82E-02 | 7.11E-01 | -4.89E-02 | 5.64E-02 | 3.87E-01 |
| 1-ribosyl-imidazoleacetate*                         | 8.23E-02  | 6.03E-02 | 1.73E-01 | 1.16E-01  | 5.81E-02 | 4.64E-02 | 2.72E-02  | 5.68E-02 | 6.32E-01 |
| 2-arachidonoyl-GPE (20:4)*                          | -1.41E-01 | 6.44E-02 | 2.93E-02 | -1.01E-01 | 6.26E-02 | 1.08E-01 | -6.90E-02 | 6.10E-02 | 2.59E-01 |
| leucylleucine                                       | 5.49E-02  | 6.49E-02 | 3.98E-01 | 4.89E-02  | 6.28E-02 | 4.37E-01 | -5.15E-02 | 6.10E-02 | 3.99E-01 |
| N2-acetyllysine                                     | -1.23E-01 | 6.47E-02 | 5.92E-02 | -9.43E-02 | 6.28E-02 | 1.34E-01 | -1.89E-02 | 6.12E-02 | 7.58E-01 |
| alpha-hydroxycaproate                               | -2.13E-02 | 6.54E-02 | 7.45E-01 | -9.02E-02 | 6.31E-02 | 1.54E-01 | -6.25E-02 | 6.14E-02 | 3.10E-01 |
| 3,4-dihydroxybutyrate                               | -5.91E-02 | 5.97E-02 | 3.23E-01 | -5.44E-02 | 5.78E-02 | 3.47E-01 | -7.34E-02 | 5.60E-02 | 1.91E-01 |
| indoleacetylglutamine                               | -5.96E-02 | 5.71E-02 | 2.98E-01 | -1.30E-01 | 5.48E-02 | 1.87E-02 | -5.61E-03 | 5.38E-02 | 8.88E-01 |
| hexanoylglutamine                                   | -1.03E-01 | 6.23E-02 | 9.91E-02 | -1.25E-01 | 6.01E-02 | 3.83E-02 | -1.10E-01 | 5.85E-02 | 6.14E-02 |
| N6-acetyllysine                                     | 6.90E-02  | 6.14E-02 | 2.62E-01 | 1.11E-01  | 5.92E-02 | 6.24E-02 | 1.89E-02  | 5.78E-02 | 7.44E-01 |
| dihomo-linolenate (20:3n3 or n6)                    | -1.10E-01 | 6.36E-02 | 8.48E-02 | -1.48E-01 | 6.12E-02 | 1.66E-02 | -1.11E-01 | 5.97E-02 | 6.35E-02 |
| mannitol/sorbitol                                   | 6.67E-02  | 6.35E-02 | 2.94E-01 | 1.01E-01  | 6.13E-02 | 1.01E-01 | 9.90E-02  | 5.95E-02 | 9.73E-02 |
| tryptophan betaine                                  | 2.31E-01  | 5.85E-02 | 1.00E-04 | 2.23E-01  | 5.66E-02 | 1.06E-04 | 1.94E-01  | 5.53E-02 | 5.12E-04 |
| 4-vinylphenol sulfate                               | 1.37E-01  | 6.49E-02 | 3.61E-02 | 1.98E-01  | 6.22E-02 | 1.61E-03 | 6.06E-02  | 6.14E-02 | 3.25E-01 |
| 4-ethylphenylsulfate                                | 9.72E-02  | 6.58E-02 | 1.41E-01 | 1.59E-01  | 6.32E-02 | 1.25E-02 | -6.34E-04 | 6.21E-02 | 9.92E-01 |
| thymol sulfate                                      | 9.05E-02  | 6.49E-02 | 1.64E-01 | -3.99E-02 | 6.30E-02 | 5.27E-01 | 4.81E-02  | 6.11E-02 | 4.32E-01 |
| 3-methyladipate                                     | 1.09E-01  | 5.83E-02 | 6.19E-02 | 1.24E-01  | 5.63E-02 | 2.80E-02 | 1.12E-01  | 5.47E-02 | 4.26E-02 |
| pyrraline                                           | 2.08E-01  | 6.32E-02 | 1.10E-03 | 2.42E-01  | 6.06E-02 | 8.33E-05 | 1.72E-01  | 5.97E-02 | 4.26E-03 |
| 2-linoleoyl-GPE (18:2)*                             | -3.28E-02 | 6.27E-02 | 6.01E-01 | 2.19E-02  | 6.07E-02 | 7.18E-01 | -5.45E-03 | 5.89E-02 | 9.26E-01 |
| 1-oleoyl-GPI (18:1)                                 | 1.23E-01  | 6.57E-02 | 6.24E-02 | 1.13E-02  | 6.40E-02 | 8.60E-01 | 1.06E-01  | 6.18E-02 | 8.67E-02 |
| 1-linoleoyl-GPI (18:2)*                             | -4.55E-02 | 6.36E-02 | 4.74E-01 | -1.52E-01 | 6.09E-02 | 1.33E-02 | -7.45E-03 | 5.98E-02 | 9.01E-01 |
| 1-palmitoleoyl-GPE (16:1)*                          | -1.03E-01 | 5.99E-02 | 8.58E-02 | -1.73E-01 | 5.73E-02 | 2.73E-03 | -1.07E-01 | 5.62E-02 | 5.88E-02 |
| 1-palmitoleoyl-GPI (16:1)*                          | -2.32E-02 | 6.28E-02 | 7.12E-01 | -2.05E-01 | 5.96E-02 | 6.78E-04 | -9.13E-02 | 5.88E-02 | 1.22E-01 |
| desmethylnaproxen                                   | 3.49E-02  | 6.61E-02 | 5.98E-01 | 8.73E-02  | 6.38E-02 | 1.72E-01 | 1.03E-02  | 6.21E-02 | 8.62E-01 |
| desmethylnaproxen sulfate                           | 4.86E-02  | 6.54E-02 | 4.58E-01 | 1.09E-01  | 6.30E-02 | 8.48E-02 | 4.27E-02  | 6.15E-02 | 4.89E-01 |
| 2-hydroxyacetaminophen sulfate*                     | 1.24E-01  | 6.60E-02 | 6.06E-02 | 1.60E-01  | 6.35E-02 | 1.21E-02 | 8.79E-02  | 6.22E-02 | 1.59E-01 |
| 2-methoxyacetaminophen sulfate*                     | 9.33E-02  | 6.47E-02 | 1.50E-01 | 1.35E-01  | 6.23E-02 | 3.15E-02 | 8.83E-02  | 6.08E-02 | 1.48E-01 |
| 2-methoxyacetaminophen glucuronide*                 | 9.09E-02  | 6.57E-02 | 1.67E-01 | 1.36E-01  | 6.33E-02 | 3.20E-02 | 7.22E-02  | 6.18E-02 | 2.44E-01 |
| 3-(cystein-S-yl)acetaminophen*                      | 1.32E-01  | 6.75E-02 | 5.10E-02 | 1.42E-01  | 6.53E-02 | 3.06E-02 | 6.02E-02  | 6.38E-02 | 3.47E-01 |
| o-cresol sulfate                                    | 3.15E-02  | 5.81E-02 | 5.89E-01 | -7.62E-02 | 5.61E-02 | 1.75E-01 | 3.76E-02  | 5.46E-02 | 4.92E-01 |
| dimethylarginine (SDMA + ADMA)                      | -1.74E-02 | 6.24E-02 | 7.81E-01 | 1.61E-02  | 6.04E-02 | 7.90E-01 | -6.06E-02 | 5.86E-02 | 3.02E-01 |
| gamma-glutamylalanine                               | -1.12E-01 | 6.43E-02 | 8.17E-02 | -4.25E-02 | 6.25E-02 | 4.97E-01 | -4.63E-02 | 6.07E-02 | 4.46E-01 |
| N-acetylserine                                      | 2.93E-02  | 6.43E-02 | 6.49E-01 | 1.50E-01  | 6.16E-02 | 1.57E-02 | 1.61E-02  | 6.05E-02 | 7.91E-01 |
| 1-stearoyl-2-oleoyl-GPE (18:0/18:1)                 | 1.51E-01  | 6.42E-02 | 1.92E-02 | 7.47E-02  | 6.26E-02 | 2.34E-01 | 1.72E-01  | 6.01E-02 | 4.48E-03 |
| chiro-inositol                                      | 2.01E-01  | 6.68E-02 | 2.87E-03 | 2.03E-01  | 6.46E-02 | 1.87E-03 | 1.60E-01  | 6.31E-02 | 1.20E-02 |
| 4-allylphenol sulfate                               | 1.68E-01  | 6.74E-02 | 1.30E-02 | 1.44E-01  | 6.54E-02 | 2.90E-02 | 9.94E-02  | 6.38E-02 | 1.20E-01 |
| 1-stearoyl-2-arachidonoyl-GPC (18:0/20:4)           | -6.34E-02 | 6.28E-02 | 3.13E-01 | -1.22E-01 | 6.04E-02 | 4.36E-02 | -2.14E-02 | 5.91E-02 | 7.17E-01 |
| 1-palmitoyl-2-linoleoyl-GPE (16:0/18:2)             | 6.30E-02  | 6.50E-02 | 3.34E-01 | -7.08E-03 | 6.30E-02 | 9.11E-01 | 4.63E-02  | 6.12E-02 | 4.50E-01 |
| 1-stearoyl-2-arachidonoyl-GPS (18:0/20:4)           | -1.30E-02 | 6.60E-02 | 8.44E-01 | 2.67E-02  | 6.39E-02 | 6.77E-01 | 4.00E-03  | 6.21E-02 | 9.49E-01 |
| sphinganine-1-phosphate                             | -5.19E-02 | 6.63E-02 | 4.34E-01 | -2.33E-04 | 6.42E-02 | 9.97E-01 | -2.24E-03 | 6.24E-02 | 9.71E-01 |
| glycosyl-N-nervonoyl-sphingosine (d18:1/24:1)*      | -3.18E-02 | 6.19E-02 | 6.09E-01 | -7.75E-02 | 5.98E-02 | 1.96E-01 | 4.38E-02  | 5.82E-02 | 4.52E-01 |
| glycosyl-N-stearoyl-sphingosine (d18:1/18:0)        | -1.70E-01 | 6.13E-02 | 5.99E-03 | -1.94E-01 | 5.90E-02 | 1.16E-03 | -1.07E-01 | 5.81E-02 | 6.72E-02 |
| cyclo(leu-pro)                                      | -1.11E-01 | 6.48E-02 | 8.91E-02 | -1.67E-01 | 6.23E-02 | 7.90E-03 | -4.68E-02 | 6.12E-02 | 4.45E-01 |
| succinylcarnitine (C4-DC)                           | 5.02E-03  | 6.34E-02 | 9.37E-01 | 1.24E-01  | 6.09E-02 | 4.19E-02 | -8.94E-03 | 5.96E-02 | 8.81E-01 |
| bilirubin (E,E)*                                    | -6.11E-02 | 6.08E-02 | 3.16E-01 | -4.99E-02 | 5.88E-02 | 3.97E-01 | -5.50E-03 | 5.72E-02 | 9.23E-01 |
| bilirubin (E,Z or Z,E)*                             | -1.49E-02 | 6.14E-02 | 8.08E-01 | -2.91E-02 | 5.94E-02 | 6.25E-01 | 1.26E-02  | 5.77E-02 | 8.28E-01 |
| N-methylproline                                     | 2.45E-01  | 6.50E-02 | 1.99E-04 | 2.80E-01  | 6.22E-02 | 1.04E-05 | 1.72E-01  | 6.18E-02 | 5.72E-03 |
| beta-cryptoxanthin                                  | 3.10E-01  | 5.83E-02 | 2.17E-07 | 2.43E-01  | 5.74E-02 | 3.16E-05 | 2.38E-01  | 5.57E-02 | 2.66E-05 |
| 5alpha-androstan-3beta,17beta-diol disulfate        | -1.49E-01 | 5.28E-02 | 5.22E-03 | -1.83E-01 | 5.06E-02 | 3.44E-04 | -7.36E-02 | 5.01E-02 | 1.43E-01 |
| 5alpha-pregnan-3beta,20alpha-diol disulfate         | -1.14E-01 | 6.63E-02 | 8.55E-02 | -8.89E-02 | 6.43E-02 | 1.68E-01 | -1.55E-01 | 6.20E-02 | 1.27E-02 |
| glycocholate sulfate*                               | -1.13E-01 | 5.94E-02 | 5.86E-02 | -7.95E-02 | 5.77E-02 | 1.70E-01 | -1.05E-01 | 5.59E-02 | 6.13E-02 |
| taurocholate sulfate*                               | -3.33E-02 | 6.46E-02 | 6.06E-01 | -9.49E-02 | 6.23E-02 | 1.29E-01 | -9.93E-02 | 6.05E-02 | 1.02E-01 |
| androstenediol (3beta,17beta) disulfate (1)         | -1.48E-01 | 5.67E-02 | 9.47E-03 | -2.41E-01 | 5.36E-02 | 1.06E-05 | -9.73E-02 | 5.36E-02 | 7.07E-02 |
| pregnenediol disulfate (C21H34O8S2)*                | -1.40E-01 | 5.81E-02 | 1.68E-02 | -1.60E-01 | 5.60E-02 | 4.53E-03 | -1.34E-01 | 5.46E-02 | 1.45E-02 |
| androstenediol (3beta,17beta) disulfate (2)         | -2.00E-01 | 5.52E-02 | 3.54E-04 | -1.48E-01 | 5.39E-02 | 6.33E-03 | -1.71E-01 | 5.21E-02 | 1.17E-03 |
| 21-hydroxypregnenolone disulfate                    | -1.27E-01 | 6.18E-02 | 4.08E-02 | -1.09E-01 | 5.99E-02 | 6.97E-02 | -1.25E-01 | 5.81E-02 | 3.28E-02 |
| 5alpha-androstan-3alpha,17alpha-diol monosulfate    | -1.17E-01 | 5.79E-02 | 4.39E-02 | -5.58E-03 | 5.64E-02 | 9.21E-01 | -1.09E-01 | 5.44E-02 | 4.62E-02 |
| 5alpha-pregnan-3beta,20beta-diol monosulfate (1)    | -1.35E-01 | 6.38E-02 | 3.48E-02 | -9.08E-02 | 6.20E-02 | 1.44E-01 | -1.77E-01 | 5.95E-02 | 3.16E-03 |
| 5alpha-pregnan-3beta,20alpha-diol monosulfate (2)   | -8.89E-02 | 6.35E-02 | 1.62E-01 | -2.88E-02 | 6.16E-02 | 6.41E-03 | -1.43E-01 | 5.93E-02 | 1.62E-02 |
| 5alpha-pregnan-diol disulfate                       | -1.72E-01 | 6.21E-02 | 6.07E-03 | -1.28E-01 | 6.04E-02 | 3.47E-02 | -1.50E-01 | 5.85E-02 | 1.11E-02 |
| 5alpha-androstan-3alpha,17beta-diol disulfate       | -7.81E-02 | 5.58E-02 | 1.63E-01 | -5.13E-02 | 5.41E-02 | 3.44E-01 | -1.02E-01 | 5.23E-02 | 5.23E-02 |
| 5alpha-androstan-3alpha,17beta-diol monosulfate (1) | -1.56E-01 | 6.14E-02 | 1.13E-02 | -1.51E-01 | 5.94E-02 | 1.14E-02 | -9.45E-02 | 5.81E-02 | 1.05E-01 |
| 5alpha-androstan-3beta,17alpha-diol disulfate       | -1.10E-01 | 6.27E-02 | 7.97E-02 | -5.15E-02 | 6.09E-02 | 3.98E-01 | -6.51E-02 | 5.92E-02 | 2.72E-01 |
| 5alpha-androstan-3beta,17beta-diol monosulfate (2)  | -1.36E-01 | 5.85E-02 | 2.10E-02 | -1.49E-01 | 5.65E-02 | 8.87E-03 | -7.29E-02 | 5.54E-02 | 1.89E-01 |
| androstenediol (3alpha, 17alpha) monosulfate (2)    | -1.49E-01 | 5.52E-02 | 7.52E-03 | -1.89E-02 | 5.41E-02 | 7.27E-01 | -1.42E-01 | 5.19E-02 | 6.57E-03 |
| androstenediol (3alpha, 17alpha) monosulfate (3)    | -1.87E-01 | 5.41E-02 | 6.31E-04 | -1.50E-01 | 5.27E-02 | 4.69E-03 | -1.61E-01 | 5.10E-02 | 1.75E-03 |
| androstenediol (3beta,17beta) monosulfate (1)       | -1.37E-01 | 5.69E-02 | 1.67E-02 | -1.57E-01 | 5.49E-02 | 4.65E-03 | -1.12E-01 | 5.37E-02 | 3.79E-02 |
| androstenediol (3beta,17beta) monosulfate (2)       | -1.28E-01 | 6.17E-02 | 3.85E-02 | -1.30E-01 | 5.97E-02 | 2.99E-02 | -4.62E-02 | 5.84E-02 | 4.29E-01 |
| 5alpha-pregnan-3beta-ol,20-one sulfate              | -1.75E-02 | 6.40E-02 | 7.84E-01 | -3.12E-02 | 6.19E-02 | 6.15E-01 | -4.28E-02 | 6.01E-02 | 4.77E-01 |
| 4-hydroxycoumarin                                   | 1.27E-01  | 6.38E-02 | 4.79E-02 | 7.87E-02  | 6.21E-02 | 2.06E-01 | 3.27E-02  | 6.04E-02 | 5.88E-01 |
| 1-docosahexaenoyl-GPE (22:6)*                       | 2.55E-02  | 6.10E-02 | 6.77E-01 | -1.25E-01 | 5.86E-02 | 3.32E-02 | 9.92E-02  | 5.71E-02 | 8.35E-02 |
| 2-docosahexaenoyl-GPE (22:6)*                       | 1.07E-02  | 6.64E-02 | 8.72E-01 | -7.42E-02 | 6.41E-02 | 2.48E-01 | 2.14E-02  | 6.24E-02 | 7.31E-02 |
| 1-docosapentaenoyl-GPC (22:5n3)*                    | -2.69E-02 | 6.47E-02 | 6.77E-01 | 1.36E-02  | 6.26E-02 | 8.28E-01 | 2.60E-02  | 6.08E-02 | 6.69E-01 |

Supplementary Table 4: Parameter estimates for metabolome-wide association studies for diet-metabolite associations for each of: HEI-15, DASH and AMED diet, controlling for BMI

|                                             |           |          |          |           |          |          |           |          |          |
|---------------------------------------------|-----------|----------|----------|-----------|----------|----------|-----------|----------|----------|
| 1-docosapentaenoyl-GPE (22:5n6)*            | -2.16E-01 | 6.16E-02 | 5.29E-04 | -2.09E-01 | 5.96E-02 | 5.28E-04 | -1.87E-01 | 5.81E-02 | 1.48E-03 |
| pregnenediol sulfate (C21H34O5S)*           | -1.09E-01 | 5.91E-02 | 6.67E-02 | -9.91E-02 | 5.72E-02 | 8.44E-02 | -1.30E-01 | 5.53E-02 | 1.94E-02 |
| 2-hydroxyglutarate                          | -7.55E-02 | 6.66E-02 | 2.58E-01 | -1.46E-01 | 6.40E-02 | 2.28E-02 | 1.07E-02  | 6.27E-02 | 8.65E-01 |
| gamma-CEHC                                  | -8.04E-02 | 6.30E-02 | 2.03E-01 | 5.68E-02  | 6.11E-02 | 3.53E-01 | -5.90E-02 | 5.93E-02 | 3.21E-01 |
| N-acetyl-beta-alanine                       | 1.16E-01  | 5.90E-02 | 5.08E-02 | 7.49E-02  | 5.73E-02 | 1.92E-01 | 1.18E-01  | 5.54E-02 | 3.45E-02 |
| 5-methylthioribose**                        | 5.43E-02  | 6.22E-02 | 3.83E-01 | 1.43E-01  | 5.97E-02 | 1.70E-02 | 4.65E-02  | 5.85E-02 | 4.28E-01 |
| sphingomyelin (d18:1/18:1, d18:2/18:0)      | -2.09E-01 | 5.62E-02 | 2.46E-04 | -2.11E-01 | 5.43E-02 | 1.26E-04 | -1.05E-01 | 5.38E-02 | 5.10E-02 |
| palmitoyl sphingomyelin (d18:1/16:0)        | -4.68E-02 | 6.24E-02 | 4.54E-01 | -6.83E-02 | 6.03E-02 | 2.58E-01 | -9.78E-03 | 5.87E-02 | 8.68E-01 |
| cysteine sulfinic acid                      | -1.87E-01 | 6.02E-02 | 2.11E-03 | -2.27E-01 | 5.77E-02 | 1.03E-04 | -1.16E-01 | 5.72E-02 | 4.29E-02 |
| 3-hydroxyhippurate                          | 1.29E-01  | 6.36E-02 | 4.39E-02 | 1.33E-01  | 6.15E-02 | 3.13E-02 | 1.41E-01  | 5.96E-02 | 1.89E-02 |
| 16a-hydroxy DHEA 3-sulfate                  | -1.25E-01 | 6.19E-02 | 4.49E-02 | -4.91E-02 | 6.02E-02 | 4.16E-01 | -1.57E-01 | 5.78E-02 | 6.91E-03 |
| 17alpha-hydroxypregnenolone 3-sulfate       | -1.25E-01 | 5.94E-02 | 3.69E-02 | -1.05E-01 | 5.76E-02 | 6.92E-02 | -1.81E-01 | 5.53E-02 | 1.19E-03 |
| pregnenolone sulfate                        | -1.20E-01 | 6.04E-02 | 4.74E-02 | -1.24E-01 | 5.84E-02 | 3.52E-02 | -1.64E-01 | 5.64E-02 | 3.87E-03 |
| 5-HEPE                                      | 1.50E-02  | 6.42E-02 | 8.15E-01 | -4.33E-02 | 6.21E-02 | 4.87E-01 | 8.35E-02  | 6.02E-02 | 1.66E-01 |
| 5-HETE                                      | -8.13E-02 | 6.52E-02 | 2.13E-01 | -1.37E-01 | 6.27E-02 | 2.96E-02 | -5.58E-02 | 6.13E-02 | 3.64E-01 |
| andro steroid monosulfate C19H28O6S (1)*    | -1.21E-01 | 6.04E-02 | 4.67E-02 | -7.56E-02 | 5.87E-02 | 1.99E-01 | -1.57E-01 | 5.64E-02 | 5.78E-03 |
| ergothioneine                               | 1.70E-01  | 6.10E-02 | 5.65E-03 | 1.05E-02  | 5.99E-02 | 8.61E-01 | 1.49E-01  | 5.75E-02 | 9.80E-03 |
| 1-margaroyl-GPE (17:0)*                     | 5.90E-02  | 6.33E-02 | 3.52E-01 | 9.79E-02  | 6.11E-02 | 1.10E-01 | -2.51E-02 | 5.96E-02 | 6.74E-01 |
| 1-pentadecanoyl-GPC (15:0)*                 | -7.17E-03 | 5.87E-02 | 9.03E-01 | 9.74E-02  | 5.65E-02 | 8.56E-02 | -1.09E-01 | 5.48E-02 | 4.74E-02 |
| S-methylmethionine                          | 1.70E-01  | 6.35E-02 | 7.81E-03 | 2.14E-01  | 6.09E-02 | 5.14E-04 | 2.55E-01  | 5.85E-02 | 1.79E-05 |
| indole-3-carboxylate                        | 1.45E-01  | 6.51E-02 | 2.66E-02 | 1.34E-01  | 6.31E-02 | 3.48E-02 | 7.50E-03  | 6.18E-02 | 9.03E-01 |
| 13-HODE + 9-HODE                            | -5.06E-02 | 6.25E-02 | 4.18E-01 | -4.72E-02 | 6.05E-02 | 4.36E-01 | -9.57E-03 | 5.88E-02 | 8.71E-01 |
| tridecenedioate (C13:1-DC)*                 | -2.34E-01 | 5.96E-02 | 1.10E-04 | -1.10E-01 | 5.89E-02 | 6.39E-02 | -2.51E-01 | 5.56E-02 | 9.20E-06 |
| N-acetyl-3-methylhistidine*                 | -7.85E-02 | 6.59E-02 | 2.34E-01 | -7.49E-02 | 6.38E-02 | 2.41E-01 | -7.56E-02 | 6.19E-02 | 2.23E-01 |
| 4-cholesten-3-one                           | 6.24E-02  | 6.46E-02 | 3.35E-01 | -7.10E-02 | 6.25E-02 | 2.57E-01 | 3.36E-02  | 6.08E-02 | 5.81E-01 |
| cinnamoylglycine                            | 1.51E-01  | 6.00E-02 | 1.25E-02 | 1.56E-01  | 5.79E-02 | 7.68E-03 | 8.16E-02  | 5.68E-02 | 1.52E-01 |
| stearoyl ethanolamide                       | -5.04E-02 | 6.22E-02 | 4.19E-01 | -7.52E-02 | 6.01E-02 | 2.12E-01 | -2.77E-02 | 5.85E-02 | 6.37E-01 |
| cis-4-decenoylcarnitine (C10:1)             | -1.16E-01 | 6.38E-02 | 6.95E-02 | -1.15E-01 | 6.17E-02 | 6.34E-02 | -3.13E-02 | 6.03E-02 | 6.04E-01 |
| 2S,3R-dihydroxybutyrate                     | -2.12E-02 | 5.79E-02 | 7.14E-01 | -8.33E-02 | 5.58E-02 | 1.37E-01 | 1.63E-02  | 5.44E-02 | 7.65E-01 |
| phenylalanylphenylalanine                   | 1.26E-01  | 6.54E-02 | 5.52E-02 | 1.64E-01  | 6.30E-02 | 9.56E-03 | 5.59E-02  | 6.18E-02 | 3.67E-01 |
| (12 or 13)-methylmyristate (a15:0 or i15:0) | -2.00E-01 | 6.02E-02 | 1.00E-03 | -1.37E-01 | 5.89E-02 | 2.11E-02 | -1.91E-01 | 5.66E-02 | 8.34E-04 |
| (16 or 17)-methylstearate (a19:0 or i19:0)  | -1.93E-01 | 6.26E-02 | 2.28E-03 | -2.10E-01 | 6.03E-02 | 5.65E-04 | -1.82E-01 | 5.89E-02 | 2.18E-03 |
| 2R,3R-dihydroxybutyrate                     | -6.48E-02 | 6.20E-02 | 2.97E-01 | -3.36E-02 | 6.01E-02 | 5.77E-01 | -5.41E-02 | 5.83E-02 | 3.54E-01 |
| 4-methylbenzenesulfonate                    | -5.37E-02 | 6.36E-02 | 3.99E-01 | 6.13E-03  | 6.16E-02 | 9.21E-01 | -4.36E-02 | 5.98E-02 | 4.66E-01 |
| alpha-ketoglutarate*                        | 1.32E-01  | 6.07E-02 | 3.09E-02 | 1.70E-01  | 5.83E-02 | 3.78E-03 | 9.43E-02  | 5.72E-02 | 1.01E-01 |
| metformin                                   | 3.60E-02  | 7.24E-02 | 6.19E-01 | 4.40E-02  | 7.00E-02 | 5.30E-01 | -3.30E-02 | 6.80E-02 | 6.28E-01 |
| ibuprofen acyl glucuronide                  | 3.99E-02  | 6.11E-02 | 5.14E-01 | -8.27E-02 | 5.90E-02 | 1.62E-01 | 1.22E-03  | 5.75E-02 | 9.83E-01 |
| 3-hydroxyquinine                            | -3.12E-02 | 7.25E-02 | 6.67E-01 | -3.61E-02 | 7.02E-02 | 6.08E-01 | -1.74E-02 | 6.82E-02 | 7.99E-01 |
| 2,3-dihydroxyisovalerate                    | 8.83E-02  | 6.02E-02 | 1.44E-01 | -1.08E-01 | 5.81E-02 | 6.31E-02 | 2.09E-02  | 5.68E-02 | 7.13E-01 |
| allopurinol riboside                        | 1.50E-01  | 7.16E-02 | 3.70E-02 | 2.04E-03  | 6.98E-02 | 9.77E-01 | -1.40E-01 | 6.73E-02 | 3.77E-02 |
| 3-methylglutaconate                         | 1.10E-02  | 5.96E-02 | 8.54E-01 | 1.22E-01  | 5.72E-02 | 3.30E-02 | -4.59E-02 | 5.59E-02 | 4.12E-01 |
| cysteinylglycine disulfide*                 | -1.69E-01 | 5.84E-02 | 4.16E-03 | -1.29E-01 | 5.68E-02 | 2.42E-02 | -1.55E-01 | 5.49E-02 | 5.08E-03 |
| isoursodeoxycholate                         | -1.48E-01 | 6.52E-02 | 2.37E-02 | -1.18E-01 | 6.33E-02 | 6.24E-02 | -5.26E-02 | 6.18E-02 | 3.96E-01 |
| oxypurinol                                  | -1.50E-01 | 7.16E-02 | 3.70E-02 | 2.04E-03  | 6.98E-02 | 9.77E-01 | -1.40E-01 | 6.73E-02 | 3.77E-02 |
| formiminoglutamate                          | -9.42E-02 | 6.12E-02 | 1.25E-01 | -1.57E-01 | 5.87E-02 | 7.92E-03 | -5.96E-02 | 5.77E-02 | 3.02E-01 |
| hydantoin-5-propionate                      | 1.06E-01  | 6.30E-02 | 9.25E-02 | 2.13E-01  | 6.00E-02 | 4.57E-04 | 7.56E-03  | 5.95E-02 | 8.99E-01 |
| sulfate*                                    | 1.11E-01  | 6.64E-02 | 9.49E-02 | 1.20E-01  | 6.42E-02 | 6.31E-02 | 6.96E-02  | 6.26E-02 | 2.67E-01 |
| 4-hydroxy-2-oxoglutaric acid                | 2.35E-02  | 6.36E-02 | 7.12E-01 | 7.84E-02  | 6.14E-02 | 2.03E-01 | 8.26E-03  | 5.98E-02 | 8.90E-01 |
| 4-hydroxyglutamate                          | 3.45E-02  | 5.98E-02 | 5.65E-01 | 4.47E-02  | 5.79E-02 | 4.41E-01 | -1.37E-02 | 5.63E-02 | 8.07E-01 |
| L-urobilin                                  | -4.51E-03 | 6.42E-02 | 9.44E-01 | -2.30E-02 | 6.21E-02 | 7.12E-01 | -1.13E-01 | 6.00E-02 | 6.00E-02 |
| pantoate                                    | 1.31E-01  | 6.54E-02 | 4.56E-02 | 1.47E-01  | 6.31E-02 | 2.06E-02 | 3.39E-02  | 6.19E-02 | 5.85E-01 |
| hydroxycotinine                             | -5.96E-02 | 4.74E-02 | 2.09E-01 | -1.11E-01 | 4.55E-02 | 1.50E-02 | -2.94E-02 | 5.46E-02 | 5.10E-01 |
| cotinine N-oxide                            | -5.27E-02 | 4.82E-02 | 2.76E-01 | -1.04E-01 | 4.64E-02 | 2.62E-02 | -2.26E-02 | 4.54E-02 | 6.19E-01 |
| omeprazole                                  | 2.66E-02  | 7.18E-02 | 7.11E-01 | 3.10E-02  | 6.95E-02 | 6.56E-01 | -3.92E-03 | 6.75E-02 | 9.54E-01 |
| atenolol                                    | 8.79E-02  | 5.67E-02 | 1.22E-01 | 1.13E-01  | 5.47E-02 | 4.01E-02 | -7.36E-02 | 5.34E-02 | 1.69E-01 |
| diphenhydramine                             | -5.71E-02 | 6.66E-02 | 3.92E-01 | 4.04E-02  | 6.45E-02 | 5.32E-01 | -2.89E-02 | 6.27E-02 | 6.45E-01 |
| hydrochlorothiazide                         | 4.76E-02  | 6.10E-02 | 4.36E-01 | 9.72E-03  | 5.91E-02 | 8.70E-01 | 4.14E-02  | 5.74E-02 | 4.72E-01 |
| pseudoephedrine                             | -7.03E-18 | 1.19E-17 | 5.54E-01 | -2.63E-17 | 1.14E-17 | 2.16E-02 | -7.49E-18 | 1.12E-17 | 5.02E-01 |
| S-methylcysteine                            | 1.14E-02  | 6.44E-02 | 8.60E-01 | 5.43E-02  | 6.23E-02 | 3.84E-01 | 1.03E-01  | 6.03E-02 | 8.81E-02 |
| androsterone glucuronide                    | -9.23E-02 | 5.52E-02 | 9.58E-02 | 2.60E-02  | 5.37E-02 | 6.28E-01 | -8.61E-02 | 5.19E-02 | 9.87E-02 |
| argininate*                                 | 2.35E-01  | 6.23E-02 | 1.98E-04 | 2.00E-01  | 6.07E-02 | 1.11E-03 | 2.13E-01  | 5.87E-02 | 3.28E-04 |
| solanidine                                  | -1.42E-02 | 6.55E-02 | 8.29E-01 | -4.49E-02 | 6.33E-02 | 4.79E-01 | 6.78E-02  | 6.14E-02 | 2.71E-01 |
| 2-oxoarginine*                              | 2.00E-01  | 6.13E-02 | 1.25E-03 | 2.06E-01  | 5.92E-02 | 5.82E-04 | 1.28E-01  | 5.83E-02 | 2.87E-02 |
| cis-4-decenoate (10:1n6)*                   | -1.14E-01 | 6.42E-02 | 7.57E-02 | -1.66E-01 | 6.17E-02 | 7.57E-03 | -4.92E-02 | 6.06E-02 | 4.17E-01 |
| atorvastatin (lipitor)                      | 4.66E-02  | 6.62E-02 | 4.82E-01 | -1.42E-02 | 6.42E-02 | 8.25E-01 | 1.36E-02  | 6.23E-02 | 8.27E-01 |
| sertraline                                  | -2.76E-02 | 7.25E-02 | 7.03E-01 | -8.47E-02 | 7.00E-02 | 2.27E-01 | -2.57E-02 | 6.81E-02 | 7.07E-01 |
| gabapentin                                  | 4.93E-03  | 6.68E-02 | 9.41E-01 | -1.71E-02 | 6.47E-02 | 7.91E-01 | -1.22E-03 | 6.28E-02 | 9.85E-01 |
| venlafaxine                                 | 7.90E-02  | 7.21E-02 | 2.74E-01 | -1.30E-02 | 7.00E-02 | 8.53E-01 | 1.07E-01  | 6.77E-02 | 1.15E-01 |
| quetiapine                                  | 4.94E-02  | 7.07E-02 | 4.85E-01 | -3.66E-02 | 6.84E-02 | 5.93E-01 | -7.31E-02 | 6.64E-02 | 2.71E-01 |
| ethyl glucuronide                           | 4.65E-02  | 6.10E-02 | 4.47E-01 | -2.26E-01 | 5.75E-02 | 1.08E-04 | 3.12E-02  | 5.74E-02 | 5.87E-01 |
| 1-behenoyl-GPC (22:0)                       | 3.27E-01  | 5.96E-02 | 9.15E-08 | 2.45E-01  | 5.89E-02 | 4.37E-05 | 3.26E-01  | 5.57E-02 | 1.36E-08 |
| 1-erucoyl-GPC (22:1)*                       | 2.15E-01  | 5.97E-02 | 3.86E-04 | 7.93E-02  | 5.89E-02 | 1.79E-01 | 2.06E-01  | 5.61E-02 | 2.96E-04 |
| 1-adrenoyl-GPC (22:4)*                      | -1.33E-01 | 6.04E-02 | 2.91E-02 | -9.70E-02 | 5.87E-02 | 9.95E-02 | -1.28E-01 | 5.68E-02 | 2.47E-02 |
| 1-lignoceroyl-GPC (24:0)                    | 3.45E-01  | 5.93E-02 | 1.66E-08 | 2.64E-01  | 5.87E-02 | 1.02E-05 | 3.77E-01  | 5.46E-02 | 3.19E-11 |
| 1-nervonoyl-GPC (24:1n9)*                   | 2.35E-01  | 5.84E-02 | 7.22E-05 | 4.67E-02  | 5.81E-02 | 4.22E-01 | 2.35E-01  | 5.47E-02 | 2.37E-05 |
| 1-(1-enyl-palmitoyl)-GPC (P-16:0)*          | 5.44E-02  | 6.45E-02 | 4.00E-01 | -1.29E-02 | 6.25E-02 | 8.37E-01 | 4.02E-02  | 6.07E-02 | 5.08E-01 |
| 1-(1-enyl-oleoyl)-GPC (P-18:1)*             | 1.28E-01  | 6.15E-02 | 3.78E-02 | 3.40E-02  | 6.00E-02 | 5.71E-01 | 1.61E-01  | 5.75E-02 | 5.35E-03 |
| 1-(1-enyl-stearoyl)-GPC (P-18:0)*           | -7.96E-03 | 6.14E-02 | 8.97E-01 | -5.38E-03 | 5.95E-02 | 9.28E-01 | -8.86E-03 | 5.78E-02 | 8.78E-01 |
| 1-methyl-5-imidazoleacetate                 | 2.16E-02  | 6.41E-02 | 7.36E-01 | 4.27E-02  | 6.20E-02 | 4.91E-01 | -7.01E-02 | 6.01E-02 | 2.45E-01 |
| glycoursodeoxycholate                       | -8.71E-02 | 6.59E-02 | 1.87E-01 | -1.11E-01 | 6.37E-02 | 8.12E-02 | -8.56E-02 | 6.20E-02 | 1.69E-01 |
| taucoursodeoxycholate                       | -8.90E-02 | 6.65E-02 | 1.82E-01 | -1.10E-01 | 6.42E-02 | 8.65E-02 | -7.54E-02 | 6.20E-02 | 2.34E-01 |
| S-methylcysteine sulfoxide                  | 1.49E-01  | 6.21E-02 | 1.68E-02 | 1.64E-01  | 5.99E-02 | 6.41E-03 | 1.71E-01  | 5.80E-02 | 3.52E-03 |

Supplementary Table 4: Parameter estimates for metabolome-wide association studies for diet-metabolite associations for each of: HEI-15, DASH and AMED diet, controlling for BMI

|                                             |           |          |          |           |          |          |           |          |          |
|---------------------------------------------|-----------|----------|----------|-----------|----------|----------|-----------|----------|----------|
| benzoylcegonine                             | -5.29E-02 | 5.37E-02 | 3.25E-01 | -3.41E-02 | 5.20E-02 | 5.12E-01 | 1.48E-02  | 5.05E-02 | 7.70E-01 |
| (14 or 15)-methylpalmitate (a17:0 or i17:0) | -2.35E-01 | 6.11E-02 | 1.53E-04 | -2.04E-01 | 5.95E-02 | 6.90E-04 | -2.35E-01 | 5.73E-02 | 5.29E-05 |
| eicosanedioate (C20-DC)                     | -1.59E-01 | 6.52E-02 | 1.53E-02 | -9.56E-02 | 6.36E-02 | 1.34E-01 | -9.34E-02 | 6.17E-02 | 1.31E-01 |
| docosadioate (C22-DC)                       | -9.95E-02 | 6.73E-02 | 1.41E-01 | -2.30E-02 | 6.54E-02 | 7.25E-01 | -9.49E-02 | 6.33E-02 | 1.35E-01 |
| 16-hydroxypalmitate                         | -1.72E-01 | 6.37E-02 | 7.26E-03 | -1.57E-01 | 6.18E-02 | 1.18E-02 | -1.41E-01 | 6.01E-02 | 2.00E-02 |
| quinine                                     | -3.12E-02 | 7.25E-02 | 6.67E-01 | -3.61E-02 | 7.02E-02 | 6.08E-01 | -1.74E-02 | 6.82E-02 | 7.99E-01 |
| oleoyl-linoleoyl-glycerol (18:1/18:2) [1]   | 8.72E-02  | 6.24E-02 | 1.64E-01 | 7.50E-02  | 6.05E-02 | 2.16E-01 | 3.69E-02  | 5.89E-02 | 5.31E-01 |
| oleoyl-linoleoyl-glycerol (18:1/18:2) [2]   | 1.21E-01  | 6.26E-02 | 5.36E-02 | 8.61E-02  | 6.08E-02 | 1.58E-01 | 7.61E-02  | 5.97E-02 | 1.99E-01 |
| 1-(1-enyl-palmitoyl)-GPE (P-16:0)*          | -2.90E-02 | 6.47E-02 | 6.54E-01 | -5.03E-02 | 6.26E-02 | 4.22E-01 | 7.76E-03  | 6.09E-02 | 8.99E-01 |
| 1-(1-enyl-stearoyl)-GPE (P-18:0)*           | -5.27E-02 | 6.39E-02 | 4.10E-01 | -5.60E-02 | 6.18E-02 | 3.66E-01 | 2.04E-02  | 6.01E-02 | 7.34E-01 |
| 2-stearoyl-GPI (18:0)*                      | 5.95E-02  | 6.36E-02 | 3.51E-01 | 2.51E-02  | 6.17E-02 | 6.84E-01 | 7.74E-02  | 5.97E-02 | 1.96E-01 |
| alpha-CEHC glucuronide*                     | 1.45E-01  | 6.54E-02 | 2.71E-02 | 1.08E-01  | 6.36E-02 | 8.95E-02 | 8.39E-03  | 6.21E-02 | 8.93E-01 |
| 2-oxindole-3-acetate                        | 8.97E-02  | 6.64E-02 | 1.78E-01 | 7.84E-02  | 6.44E-02 | 2.24E-01 | 7.99E-02  | 6.25E-02 | 2.02E-01 |
| N-oleoyltaurine                             | 1.10E-01  | 6.53E-02 | 9.42E-02 | 4.97E-02  | 6.34E-02 | 4.34E-01 | 5.91E-02  | 6.16E-02 | 3.38E-01 |
| linoleoylcarnitine (C18:2)*                 | -5.16E-02 | 6.35E-02 | 4.17E-01 | -5.46E-02 | 6.15E-02 | 3.75E-01 | 1.74E-02  | 5.98E-02 | 7.71E-01 |
| isoleucylglycine                            | -1.81E-02 | 6.47E-02 | 7.80E-01 | 5.21E-02  | 6.26E-02 | 4.06E-01 | 3.53E-02  | 6.08E-02 | 5.62E-01 |
| leucylglycine                               | -3.61E-02 | 6.55E-02 | 5.82E-01 | 7.55E-02  | 6.33E-02 | 3.65E-01 | 4.61E-02  | 6.16E-02 | 4.55E-01 |
| phenylalanylisoleucine                      | 2.56E-02  | 6.47E-02 | 6.93E-01 | 8.83E-02  | 6.24E-02 | 1.58E-01 | 3.91E-02  | 6.08E-02 | 5.21E-01 |
| phenylalanylleucine                         | 5.62E-02  | 6.85E-02 | 4.13E-01 | 5.97E-02  | 6.63E-02 | 3.69E-01 | 1.57E-02  | 6.45E-02 | 8.08E-01 |
| N-palmitoyltaurine                          | 7.39E-02  | 6.45E-02 | 2.53E-01 | 3.59E-02  | 6.26E-02 | 5.67E-01 | 3.52E-05  | 6.08E-02 | 1.00E+00 |
| N-stearoyltaurine                           | -7.00E-02 | 6.52E-02 | 2.84E-01 | -3.86E-02 | 6.32E-02 | 5.42E-01 | -5.60E-02 | 6.13E-02 | 3.62E-01 |
| 2-O-methylascorbic acid                     | 1.25E-01  | 5.90E-02 | 3.50E-02 | 1.10E-01  | 5.72E-02 | 5.60E-02 | 1.62E-02  | 5.59E-02 | 7.73E-01 |
| beta-citrylgutamate                         | -8.88E-02 | 6.53E-02 | 1.75E-01 | -7.89E-02 | 6.32E-02 | 2.13E-01 | -7.91E-04 | 6.16E-02 | 9.90E-01 |
| rosuvastatin                                | 5.18E-03  | 6.82E-02 | 9.39E-01 | 4.37E-03  | 6.60E-02 | 9.47E-01 | 4.87E-02  | 6.40E-02 | 4.47E-01 |
| trimethylamine N-oxide                      | 7.25E-03  | 6.41E-02 | 9.10E-01 | 1.08E-02  | 6.20E-02 | 8.62E-01 | 3.16E-02  | 6.02E-02 | 6.00E-01 |
| N6-methyllysine                             | -2.03E-02 | 5.83E-02 | 7.27E-01 | -6.21E-02 | 5.63E-02 | 2.71E-01 | 4.68E-02  | 5.47E-02 | 3.94E-01 |
| dihydroferulate                             | 1.28E-01  | 6.44E-02 | 4.82E-02 | 1.53E-01  | 6.21E-02 | 1.44E-02 | 1.00E-01  | 6.07E-02 | 1.00E-01 |
| imidazole propionate                        | -2.10E-02 | 6.40E-02 | 7.43E-01 | -4.11E-02 | 6.19E-02 | 5.07E-01 | 2.57E-02  | 6.02E-02 | 6.70E-01 |
| citalopram/escitalopram                     | -9.96E-02 | 6.86E-02 | 1.48E-01 | -2.26E-02 | 6.66E-02 | 7.35E-01 | -1.95E-02 | 6.47E-02 | 7.64E-01 |
| duloxetine                                  | -7.03E-18 | 1.19E-17 | 5.54E-01 | -2.63E-17 | 1.14E-17 | 2.16E-02 | -7.49E-18 | 1.12E-17 | 5.02E-01 |
| milnacipran                                 | 4.19E-02  | 7.26E-02 | 5.64E-01 | 1.21E-01  | 7.00E-02 | 8.53E-02 | -6.69E-02 | 6.82E-02 | 3.28E-01 |
| pregnanediol-3-glucuronide                  | -2.99E-02 | 6.31E-02 | 6.35E-01 | -5.80E-02 | 6.10E-02 | 3.43E-01 | -9.87E-02 | 5.91E-02 | 9.59E-02 |
| (15:2)-anacardic acid                       | 4.12E-02  | 6.97E-02 | 5.55E-01 | 4.40E-02  | 6.75E-02 | 5.15E-01 | -3.14E-02 | 6.56E-02 | 6.32E-01 |
| alliin                                      | 1.48E-02  | 6.29E-02 | 8.14E-01 | -7.36E-02 | 6.07E-02 | 2.26E-01 | 1.00E-01  | 5.88E-02 | 8.90E-02 |
| seryltyrosine                               | 1.19E-01  | 6.77E-02 | 8.03E-02 | 1.24E-01  | 6.54E-02 | 5.87E-02 | 7.77E-02  | 6.38E-02 | 2.25E-01 |
| histidylalanine                             | 6.33E-02  | 6.67E-02 | 3.43E-01 | 6.72E-02  | 6.45E-02 | 2.99E-01 | 5.35E-02  | 6.27E-02 | 3.94E-01 |
| phenylalanylglycine                         | 8.00E-02  | 6.68E-02 | 2.32E-01 | 4.93E-02  | 6.48E-02 | 4.48E-01 | 5.97E-02  | 6.29E-02 | 3.43E-01 |
| phenylalanylmethionine                      | 1.19E-01  | 6.63E-02 | 7.32E-02 | 1.41E-01  | 6.40E-02 | 2.84E-02 | 3.44E-02  | 6.27E-02 | 5.84E-01 |
| phenylalanyltrypophan                       | -7.42E-02 | 6.42E-02 | 2.48E-01 | -1.43E-01 | 6.17E-02 | 2.10E-02 | -4.99E-02 | 6.04E-02 | 4.10E-01 |
| tyrosyllysine                               | 1.00E-01  | 6.77E-02 | 1.40E-01 | 1.39E-01  | 6.53E-02 | 3.39E-02 | 7.95E-02  | 6.38E-02 | 2.13E-01 |
| tryptophylasparagine                        | 1.16E-01  | 6.79E-02 | 8.78E-02 | 9.83E-02  | 6.58E-02 | 1.36E-01 | 4.71E-02  | 6.41E-02 | 4.63E-01 |
| aspartylaspartate                           | 4.27E-02  | 6.60E-02 | 5.18E-01 | 1.89E-02  | 6.39E-02 | 7.67E-01 | 1.11E-01  | 6.17E-02 | 7.28E-02 |
| valylalanine                                | 2.93E-02  | 6.46E-02 | 6.51E-01 | 5.86E-02  | 6.24E-02 | 3.49E-01 | 7.22E-02  | 6.06E-02 | 2.34E-01 |
| valylglycine                                | -2.50E-02 | 6.63E-02 | 7.07E-01 | 6.25E-02  | 6.41E-02 | 3.30E-01 | 2.24E-02  | 6.23E-02 | 7.20E-01 |
| valylphenylalanine                          | 8.43E-02  | 6.49E-02 | 1.95E-01 | 1.35E-01  | 6.25E-02 | 3.16E-02 | 9.08E-02  | 6.10E-02 | 1.37E-01 |
| methionylalanine                            | 3.59E-02  | 6.64E-02 | 5.89E-01 | 6.42E-02  | 6.23E-02 | 3.18E-01 | 3.46E-02  | 6.24E-02 | 5.80E-01 |
| N-palmitoylglycine                          | -6.39E-02 | 6.50E-02 | 3.26E-01 | -1.10E-01 | 6.27E-02 | 8.05E-02 | -9.33E-02 | 6.10E-02 | 1.27E-01 |
| mannonate*                                  | -5.13E-02 | 6.11E-02 | 4.02E-01 | 9.56E-03  | 5.92E-02 | 8.72E-01 | -8.64E-02 | 5.73E-02 | 1.33E-01 |
| norflouxetine                               | 8.50E-03  | 6.97E-02 | 9.03E-01 | -5.63E-02 | 6.74E-02 | 4.04E-01 | 4.12E-02  | 6.55E-02 | 5.31E-01 |
| 2-stearoyl-GPE (18:0)*                      | -8.69E-02 | 6.58E-02 | 1.88E-01 | -1.09E-01 | 6.35E-02 | 8.67E-02 | -7.24E-02 | 6.19E-02 | 2.43E-01 |
| (R)-3-hydroxybutyrylcarnitine               | -1.28E-01 | 6.37E-02 | 4.57E-02 | -1.40E-01 | 6.16E-02 | 2.34E-02 | -8.21E-02 | 6.02E-02 | 1.73E-01 |
| N-octanoylglycine                           | -8.06E-02 | 6.59E-02 | 2.22E-01 | -3.46E-02 | 6.39E-02 | 5.89E-01 | -1.05E-01 | 6.18E-02 | 9.05E-02 |
| doxylamine                                  | -3.98E-02 | 5.35E-02 | 4.57E-01 | -6.31E-02 | 5.17E-02 | 2.23E-01 | -3.15E-02 | 5.03E-02 | 5.31E-01 |
| triamterene                                 | 3.01E-02  | 7.24E-02 | 6.78E-01 | -2.11E-03 | 7.01E-02 | 9.76E-01 | -4.96E-03 | 6.81E-02 | 9.42E-01 |
| diltiazem                                   | 2.03E-02  | 7.21E-02 | 7.79E-01 | 7.41E-02  | 6.96E-02 | 2.88E-01 | 5.52E-02  | 6.77E-02 | 4.15E-01 |
| fexofenadine                                | -1.71E-02 | 6.79E-02 | 8.01E-01 | -7.37E-02 | 6.56E-02 | 2.62E-01 | -1.18E-01 | 6.34E-02 | 6.41E-02 |
| verapamil                                   | 6.81E-02  | 4.10E-02 | 9.79E-02 | 3.68E-02  | 3.98E-02 | 3.57E-01 | 3.80E-02  | 3.87E-02 | 3.28E-01 |
| N-acetylcarnosine                           | -9.25E-03 | 5.06E-02 | 8.55E-01 | 8.22E-02  | 4.87E-02 | 9.27E-02 | -3.41E-02 | 4.75E-02 | 4.73E-01 |
| margaroylcarnitine (C17)*                   | -2.18E-01 | 6.09E-02 | 4.11E-04 | -1.72E-01 | 5.94E-02 | 4.07E-03 | -1.86E-01 | 5.75E-02 | 1.39E-03 |
| N-methyltaurine                             | 1.38E-01  | 6.63E-02 | 3.78E-02 | -1.19E-02 | 6.47E-02 | 8.54E-01 | 2.01E-01  | 6.17E-02 | 1.24E-03 |
| histidine betaine (hercynine)*              | 1.46E-01  | 6.38E-02 | 2.25E-02 | -3.52E-03 | 6.23E-02 | 9.55E-01 | 2.10E-01  | 5.92E-02 | 4.60E-04 |
| glycohyocholate                             | 5.45E-02  | 6.43E-02 | 3.98E-01 | 4.51E-02  | 6.23E-02 | 4.69E-01 | 1.30E-02  | 6.05E-02 | 8.30E-01 |
| 2-hydroxydecanoate                          | 1.53E-01  | 6.38E-02 | 1.75E-02 | 1.28E-01  | 6.20E-02 | 3.95E-02 | 5.17E-02  | 6.06E-02 | 3.94E-01 |
| 3-methyl catechol sulfate (2)               | 6.04E-02  | 6.02E-02 | 3.16E-01 | 1.85E-03  | 5.83E-02 | 9.75E-01 | 1.43E-02  | 5.66E-02 | 8.01E-01 |
| 4-methylcatechol sulfate                    | 1.90E-01  | 6.38E-02 | 3.10E-03 | 1.87E-01  | 6.18E-02 | 2.73E-03 | 8.56E-02  | 6.07E-02 | 1.60E-01 |
| 3-methyl catechol sulfate (1)               | -2.56E-02 | 6.25E-02 | 6.83E-01 | -7.86E-02 | 6.03E-02 | 1.94E-01 | -4.70E-02 | 5.87E-02 | 4.24E-01 |
| 2-hydroxyibuprofen                          | -1.38E-02 | 6.26E-02 | 8.26E-01 | -1.52E-01 | 5.99E-02 | 1.16E-02 | -4.98E-02 | 5.88E-02 | 3.98E-01 |
| carboxyibuprofen                            | -1.17E-01 | 6.23E-02 | 6.08E-02 | -1.51E-01 | 6.00E-02 | 1.22E-02 | -1.08E-01 | 5.86E-02 | 6.56E-02 |
| O-desmethylenlafaxine                       | 2.79E-02  | 7.31E-02 | 7.04E-01 | -3.83E-02 | 7.08E-02 | 5.89E-01 | 1.27E-01  | 6.84E-02 | 6.41E-02 |
| zolpidem                                    | -8.38E-02 | 7.21E-02 | 2.46E-01 | -1.58E-01 | 6.93E-02 | 2.32E-02 | -4.04E-02 | 6.79E-02 | 5.52E-01 |
| warfarin                                    | 5.67E-02  | 7.18E-02 | 4.31E-01 | 9.79E-02  | 6.93E-02 | 1.59E-01 | -1.23E-01 | 6.72E-02 | 6.83E-02 |
| 3b-hydroxy-5-cholenoic acid                 | 2.32E-02  | 6.20E-02 | 7.08E-01 | 6.28E-02  | 5.99E-02 | 2.95E-01 | -2.89E-02 | 5.83E-02 | 6.21E-01 |
| guaicol sulfate                             | 2.98E-01  | 6.05E-02 | 1.46E-06 | 2.43E-01  | 5.93E-02 | 5.39E-05 | 1.86E-01  | 5.82E-02 | 1.58E-03 |
| 2-aminooctanoate                            | 8.50E-02  | 6.22E-02 | 1.73E-01 | 9.40E-02  | 6.02E-02 | 1.19E-01 | 6.06E-02  | 5.86E-02 | 3.02E-01 |
| furosemide                                  | 1.18E-01  | 6.24E-02 | 5.93E-02 | 1.55E-01  | 6.01E-02 | 1.03E-02 | 1.01E-01  | 5.87E-02 | 8.81E-02 |
| gamma-CEHC glucuronide*                     | -7.73E-02 | 6.57E-02 | 2.40E-01 | 8.37E-02  | 6.35E-02 | 1.89E-01 | -6.96E-02 | 6.17E-02 | 2.61E-01 |
| dimethyl sulfone                            | 1.16E-02  | 6.67E-02 | 8.62E-01 | 8.00E-02  | 6.44E-02 | 2.15E-01 | -4.64E-02 | 6.26E-02 | 4.59E-01 |
| N-acetyl-1-methylhistidine*                 | -2.04E-01 | 6.14E-02 | 1.00E-03 | -1.90E-01 | 5.95E-02 | 1.54E-03 | -1.20E-01 | 5.84E-02 | 4.11E-02 |
| indolin-2-one                               | -1.53E-02 | 6.80E-02 | 8.22E-01 | 7.58E-02  | 6.57E-02 | 2.49E-01 | -2.86E-02 | 6.39E-02 | 6.55E-01 |
| 2,8-quinolinediol sulfate                   | 4.91E-04  | 6.45E-02 | 9.94E-01 | 5.93E-02  | 6.23E-02 | 3.42E-01 | -4.80E-03 | 6.06E-02 | 9.37E-01 |
| 2-aminophenol sulfate                       | 1.33E-01  | 6.32E-02 | 3.66E-02 | 2.40E-01  | 5.99E-02 | 8.21E-05 | 9.02E-02  | 5.96E-02 | 1.31E-01 |
| 3-acetylphenol sulfate                      | 5.92E-02  | 6.48E-02 | 3.62E-01 | 7.07E-02  | 6.27E-02 | 2.61E-01 | 9.63E-02  | 6.08E-02 | 1.14E-01 |

Supplementary Table 4: Parameter estimates for metabolome-wide association studies for diet-metabolite associations for each of: HEI-15, DASH and AMED diet, controlling for BMI

|                                                     |           |          |          |           |          |          |           |          |          |
|-----------------------------------------------------|-----------|----------|----------|-----------|----------|----------|-----------|----------|----------|
| sphingomyelin (d18:1/14:0, d16:1/16:0)*             | -5.85E-02 | 5.92E-02 | 3.24E-01 | -4.78E-02 | 5.73E-02 | 4.05E-01 | -1.12E-01 | 5.53E-02 | 4.38E-02 |
| sphingomyelin (d18:2/16:0, d18:1/16:1)*             | -1.06E-01 | 6.00E-02 | 7.90E-02 | -1.01E-01 | 5.81E-02 | 8.24E-02 | -6.58E-03 | 5.67E-02 | 9.08E-01 |
| 3-hydroxyadipate                                    | -5.36E-02 | 6.32E-02 | 3.97E-01 | 4.28E-02  | 6.12E-02 | 4.85E-01 | -2.24E-02 | 5.95E-02 | 7.07E-01 |
| 3-hydroxycotinine glucuronide                       | -4.54E-02 | 4.80E-02 | 3.46E-01 | -7.73E-02 | 4.63E-02 | 9.62E-02 | -1.52E-02 | 4.52E-02 | 7.87E-01 |
| 6-oxopiperidine-2-carboxylate                       | 6.46E-02  | 6.46E-02 | 3.19E-01 | 1.21E-01  | 6.23E-02 | 5.32E-02 | 9.29E-02  | 6.06E-02 | 1.27E-01 |
| S-allylcysteine                                     | -1.02E-02 | 6.34E-02 | 8.72E-01 | -7.91E-02 | 6.12E-02 | 1.97E-01 | 7.66E-02  | 5.94E-02 | 1.98E-01 |
| allopurinol                                         | -8.94E-02 | 7.21E-02 | 2.16E-01 | 1.39E-02  | 7.00E-02 | 8.43E-01 | -1.16E-01 | 6.76E-02 | 8.65E-02 |
| N-delta-acetylornithine                             | 2.95E-01  | 5.53E-02 | 1.92E-07 | 1.96E-01  | 5.49E-02 | 4.11E-04 | 2.38E-01  | 5.27E-02 | 9.07E-06 |
| acisoga                                             | 9.57E-02  | 6.42E-02 | 1.37E-01 | 6.51E-02  | 6.23E-02 | 2.97E-01 | 1.60E-01  | 5.99E-02 | 7.81E-03 |
| 2-aminoheptanoate                                   | 7.92E-02  | 6.38E-02 | 2.15E-01 | 7.37E-02  | 6.17E-02 | 2.33E-01 | 7.62E-02  | 6.00E-02 | 2.05E-01 |
| 1-eicosapentaenoyl-GPE (20:5)*                      | 9.00E-02  | 6.28E-02 | 1.53E-01 | -1.01E-02 | 6.10E-02 | 8.69E-01 | 1.43E-01  | 5.86E-02 | 1.52E-02 |
| N-formylanthranilic acid                            | -2.69E-02 | 6.56E-02 | 6.83E-01 | -1.95E-02 | 6.35E-02 | 7.59E-01 | -2.32E-02 | 6.17E-02 | 7.07E-01 |
| N2,N5-diacetylornithine                             | 1.74E-01  | 6.12E-02 | 4.83E-03 | -1.18E-02 | 6.01E-02 | 8.45E-01 | 1.79E-01  | 5.74E-02 | 2.02E-03 |
| 1H-indole-7-acetic acid                             | 1.70E-02  | 6.65E-02 | 7.99E-01 | 4.59E-02  | 6.44E-02 | 4.76E-01 | -1.52E-01 | 6.19E-02 | 1.48E-02 |
| 3-methoxytyramine sulfate                           | 1.33E-01  | 6.12E-02 | 3.01E-02 | 5.45E-02  | 5.96E-02 | 3.62E-01 | 5.00E-02  | 5.79E-02 | 3.89E-01 |
| methionine sulfone                                  | 1.97E-02  | 6.40E-02 | 7.58E-01 | 4.86E-02  | 6.19E-02 | 4.33E-01 | -1.34E-02 | 6.01E-02 | 5.79E-01 |
| cyclo(ala-pro)                                      | 1.48E-02  | 6.46E-02 | 8.19E-01 | -5.56E-02 | 6.25E-02 | 3.75E-01 | 1.98E-02  | 6.07E-02 | 7.45E-01 |
| norbenzoylcegonine*                                 | -4.57E-02 | 4.76E-02 | 3.37E-01 | -4.25E-02 | 4.61E-02 | 3.57E-01 | 7.66E-04  | 4.48E-02 | 9.86E-01 |
| 1-linolenoyl-GPC (18:3)*                            | 6.01E-02  | 6.39E-02 | 3.48E-01 | 2.68E-02  | 6.20E-02 | 6.65E-01 | 7.52E-02  | 6.00E-02 | 2.12E-01 |
| 1-eicosapentaenoyl-GPC (20:5)*                      | 1.18E-01  | 6.42E-02 | 6.80E-02 | 1.87E-04  | 6.25E-02 | 9.98E-01 | 1.52E-01  | 6.00E-02 | 1.20E-02 |
| 1-eicosenoyl-GPC (20:1)*                            | 2.59E-01  | 5.76E-02 | 1.02E-05 | 1.76E-01  | 5.68E-02 | 2.10E-03 | 2.22E-01  | 5.45E-02 | 5.85E-05 |
| 1-nonadecanoyl-GPC (19:0)                           | 1.29E-01  | 5.98E-02 | 3.14E-02 | 1.56E-01  | 5.76E-02 | 7.19E-03 | 1.07E-01  | 5.63E-02 | 5.87E-02 |
| N-acetylalliin                                      | 1.06E-02  | 6.52E-02 | 8.71E-01 | -6.84E-02 | 6.30E-02 | 2.79E-01 | 8.64E-02  | 6.11E-02 | 1.58E-01 |
| 1-dihomo-linolenoyl-GPE (20:3n3 or 6)*              | 7.98E-02  | 6.39E-02 | 2.13E-01 | 4.43E-02  | 6.19E-02 | 4.75E-01 | 6.85E-04  | 6.02E-02 | 9.91E-01 |
| 1-(1-enyl-oleoyl)-GPE (P-18:1)*                     | -8.25E-03 | 6.66E-02 | 9.02E-01 | -6.36E-02 | 6.44E-02 | 3.24E-01 | 4.77E-02  | 6.26E-02 | 4.47E-01 |
| fructosyllisine                                     | -6.43E-02 | 6.42E-02 | 3.17E-01 | -7.16E-02 | 6.21E-02 | 2.50E-01 | -1.24E-01 | 6.00E-02 | 3.90E-02 |
| 1-eicosenoyl-GPE (20:1)*                            | 1.58E-01  | 6.27E-02 | 1.22E-02 | 1.16E-01  | 6.10E-02 | 5.88E-02 | 1.09E-01  | 5.92E-02 | 6.68E-02 |
| N-methylpipercolate                                 | 7.97E-02  | 5.61E-02 | 1.57E-01 | 2.81E-02  | 5.45E-02 | 6.07E-01 | 6.30E-02  | 5.28E-02 | 2.34E-01 |
| O-sulfo-L-tyrosine                                  | 6.05E-04  | 6.40E-02 | 9.92E-01 | 4.76E-03  | 6.19E-02 | 9.39E-01 | 1.09E-02  | 6.02E-02 | 8.57E-01 |
| ferulic acid 4-sulfate                              | 1.73E-01  | 6.31E-02 | 6.43E-03 | 1.68E-01  | 6.11E-02 | 6.24E-03 | 1.16E-01  | 5.97E-02 | 5.35E-02 |
| 3-(3-hydroxyphenyl)propionate sulfate               | 1.76E-01  | 6.62E-02 | 8.35E-03 | 1.74E-01  | 6.41E-02 | 7.07E-03 | 1.22E-01  | 6.26E-02 | 5.21E-02 |
| 11-ketoetiocolanolone glucuronide                   | 6.45E-02  | 6.43E-02 | 3.17E-01 | 2.39E-02  | 6.24E-02 | 7.02E-01 | -9.04E-02 | 6.04E-02 | 1.36E-01 |
| etiocolanolone glucuronide                          | -1.79E-02 | 5.98E-02 | 7.66E-01 | -3.23E-02 | 5.79E-02 | 5.78E-01 | -3.58E-02 | 5.62E-02 | 5.25E-01 |
| 17alpha-hydroxypregnanolone glucuronide             | -2.21E-02 | 5.64E-02 | 6.95E-01 | -6.18E-02 | 5.45E-02 | 2.57E-01 | -8.50E-02 | 5.28E-02 | 1.08E-01 |
| N-acetyltaurine                                     | -1.14E-02 | 5.88E-02 | 8.46E-01 | 4.57E-02  | 5.69E-02 | 4.22E-01 | 2.20E-02  | 5.53E-02 | 6.91E-01 |
| 1-docosapentaenoyl-GPC (22:5n6)*                    | -1.29E-01 | 6.18E-02 | 3.72E-02 | -1.34E-01 | 5.97E-02 | 2.57E-02 | -1.86E-01 | 5.74E-02 | 1.34E-03 |
| 1-linolenoyl-GPE (18:3)*                            | 2.93E-02  | 6.42E-02 | 6.49E-01 | 2.87E-02  | 6.22E-02 | 6.45E-01 | 3.19E-02  | 6.04E-02 | 5.98E-01 |
| 1-oleoyl-GPG (18:1)*                                | 9.89E-02  | 6.49E-02 | 1.29E-01 | 9.84E-02  | 6.28E-02 | 1.18E-01 | -5.35E-02 | 6.12E-02 | 3.83E-01 |
| 1-palmitoyl-GPG (16:0)*                             | -1.93E-02 | 6.36E-02 | 7.61E-01 | -2.22E-02 | 6.15E-02 | 7.18E-01 | -2.94E-02 | 5.98E-02 | 6.23E-01 |
| N-linoleoyltaurine*                                 | 7.98E-02  | 6.48E-02 | 2.19E-01 | 8.53E-02  | 6.27E-02 | 1.75E-01 | 5.18E-02  | 6.10E-02 | 3.97E-01 |
| N-acetyl-S-allyl-L-cysteine                         | -2.92E-02 | 6.35E-02 | 6.46E-01 | -7.91E-02 | 6.13E-02 | 1.98E-01 | 3.04E-02  | 5.97E-02 | 6.10E-01 |
| 9-hydroxystearate                                   | -1.94E-01 | 5.77E-02 | 8.97E-04 | -1.52E-01 | 5.62E-02 | 7.16E-03 | -1.46E-01 | 5.46E-02 | 7.98E-03 |
| 3-methylglutaryl carnitine (2)                      | 2.20E-02  | 6.06E-02 | 7.17E-01 | 1.15E-01  | 5.83E-02 | 4.97E-02 | -2.67E-02 | 5.70E-02 | 6.39E-01 |
| methyl glucopyranoside (alpha + beta)               | 2.51E-01  | 6.00E-02 | 3.85E-05 | 1.99E-01  | 5.87E-02 | 7.98E-04 | 1.99E-01  | 5.70E-02 | 5.70E-04 |
| 2-keto-3-deoxy-glucuronate                          | -1.94E-02 | 5.94E-02 | 7.44E-01 | 1.09E-01  | 5.71E-02 | 5.73E-02 | -6.72E-02 | 5.57E-02 | 2.29E-01 |
| alpha-CEHC sulfate                                  | 1.27E-01  | 6.64E-02 | 5.76E-02 | 8.08E-02  | 6.45E-02 | 2.11E-01 | -2.04E-02 | 6.28E-02 | 7.46E-01 |
| alpha-CMBHC glucuronide                             | -4.23E-03 | 6.47E-02 | 9.48E-01 | 2.30E-02  | 6.26E-02 | 7.14E-01 | -2.91E-02 | 6.08E-02 | 6.33E-01 |
| sphingomyelin (d18:2/14:0, d18:1/14:1)*             | 1.19E-02  | 5.19E-02 | 8.19E-01 | -1.23E-02 | 5.02E-02 | 8.07E-01 | 3.14E-02  | 4.88E-02 | 5.21E-01 |
| sphingomyelin (d18:1/24:1, d18:2/24:0)*             | -7.84E-02 | 6.22E-02 | 2.08E-01 | -2.12E-01 | 5.90E-02 | 3.94E-04 | 1.08E-02  | 5.86E-02 | 8.55E-01 |
| octadecenedioyl carnitine (C18:1-DC)*               | -1.64E-02 | 6.42E-02 | 7.99E-01 | 6.63E-02  | 6.20E-02 | 2.86E-01 | -1.85E-02 | 6.04E-02 | 7.60E-01 |
| octadecanedioyl carnitine (C18-DC)*                 | -1.16E-01 | 6.36E-02 | 6.89E-02 | 2.24E-02  | 6.19E-02 | 7.18E-01 | -1.25E-01 | 5.97E-02 | 3.78E-02 |
| N,O-didesmethylvenlafaxine glucuronide              | 3.42E-02  | 7.28E-02 | 6.39E-01 | 2.53E-02  | 7.05E-02 | 7.20E-01 | 1.03E-01  | 6.82E-02 | 1.31E-01 |
| 5alpha-androstan-3alpha,17beta-diol monosulfate (2) | -9.81E-02 | 4.69E-02 | 3.75E-02 | -6.46E-02 | 4.56E-02 | 1.58E-01 | -8.40E-02 | 4.42E-02 | 5.82E-02 |
| myristoleoyl carnitine (C14:1)*                     | -1.09E-01 | 6.35E-02 | 8.85E-02 | -1.63E-01 | 6.10E-02 | 8.06E-03 | -4.81E-02 | 6.00E-02 | 4.23E-01 |
| N-formylphenylalanine                               | 7.93E-02  | 6.52E-02 | 2.25E-01 | 3.52E-02  | 6.32E-02 | 5.79E-01 | 4.30E-02  | 6.14E-02 | 4.84E-01 |
| cyclo(pro-val)                                      | -7.80E-02 | 6.39E-02 | 2.23E-01 | -2.83E-02 | 6.20E-02 | 6.49E-01 | 7.42E-03  | 6.03E-02 | 9.02E-01 |
| 4-hydroxychlorothalonil                             | -1.20E-01 | 6.01E-02 | 4.79E-02 | -1.54E-01 | 5.79E-02 | 8.19E-03 | -8.67E-02 | 5.67E-02 | 1.28E-01 |
| isoeugenol sulfate                                  | 9.46E-03  | 6.16E-02 | 8.78E-01 | -3.67E-03 | 5.96E-02 | 9.51E-01 | 7.85E-02  | 5.77E-02 | 1.75E-01 |
| tyramine O-sulfate                                  | -5.51E-02 | 6.32E-02 | 3.84E-01 | -5.11E-02 | 6.11E-02 | 4.04E-01 | 1.43E-02  | 5.95E-02 | 8.10E-01 |
| 3-hydroxypyridine sulfate                           | 9.75E-02  | 6.05E-02 | 1.08E-01 | -2.31E-02 | 5.88E-02 | 6.94E-01 | 4.37E-02  | 5.70E-02 | 4.44E-01 |
| 4-methylguaiacol sulfate                            | 2.00E-01  | 6.67E-02 | 2.98E-03 | 1.73E-01  | 6.47E-02 | 7.80E-03 | 9.28E-02  | 6.34E-02 | 1.45E-01 |
| maltol sulfate                                      | 7.36E-02  | 6.72E-02 | 2.75E-01 | 5.14E-02  | 6.51E-02 | 4.30E-01 | 5.25E-02  | 6.33E-02 | 4.07E-01 |
| phenylacetyl carnitine                              | 6.36E-02  | 6.46E-02 | 3.25E-01 | 1.50E-01  | 6.19E-02 | 1.60E-02 | 9.44E-02  | 6.05E-02 | 1.20E-01 |
| arabonate/xylonate                                  | 1.34E-01  | 5.68E-02 | 1.87E-02 | 1.13E-01  | 5.51E-02 | 4.13E-02 | 2.05E-02  | 5.39E-02 | 7.03E-01 |
| methyl-4-hydroxybenzoate sulfate                    | -3.27E-02 | 5.95E-02 | 5.84E-01 | 3.55E-03  | 5.77E-02 | 9.51E-01 | -2.58E-02 | 5.60E-02 | 6.45E-01 |
| 1-dihomo-linolenylglycerol (20:3)                   | 1.64E-02  | 6.17E-02 | 7.90E-01 | 2.37E-02  | 5.97E-02 | 6.91E-01 | -4.06E-02 | 5.79E-02 | 4.84E-01 |
| vanillic alcohol sulfate                            | 5.23E-02  | 6.48E-02 | 4.20E-01 | 1.43E-01  | 6.22E-02 | 2.24E-02 | 5.95E-02  | 6.09E-02 | 3.29E-01 |
| 4-vinylguaiacol sulfate                             | 1.14E-01  | 6.03E-02 | 5.99E-02 | 9.08E-02  | 5.85E-02 | 1.22E-01 | 5.89E-02  | 5.70E-02 | 3.02E-01 |
| vanillactate                                        | -3.17E-02 | 5.94E-02 | 5.94E-01 | 5.59E-02  | 5.75E-02 | 3.31E-01 | -4.35E-02 | 5.58E-02 | 4.36E-01 |
| eugenol sulfate                                     | 6.80E-02  | 6.47E-02 | 2.94E-01 | 3.28E-02  | 6.27E-02 | 6.01E-01 | 7.56E-02  | 6.08E-02 | 2.15E-01 |
| pregnanolone/allopregnanolone sulfate               | 4.09E-03  | 6.63E-02 | 9.51E-01 | -4.72E-02 | 6.41E-02 | 4.62E-01 | -7.11E-02 | 6.22E-02 | 2.54E-01 |
| 2-methoxyresorcinol sulfate                         | 4.26E-02  | 6.67E-02 | 5.24E-01 | -5.18E-03 | 6.46E-02 | 9.36E-01 | 1.12E-01  | 6.24E-02 | 7.39E-02 |
| 2-acetamidophenol sulfate                           | 1.89E-01  | 6.38E-02 | 3.30E-03 | 2.54E-01  | 6.09E-02 | 4.11E-05 | 1.17E-01  | 6.05E-02 | 5.44E-02 |
| p-cresol glucuronide*                               | 3.07E-02  | 6.55E-02 | 6.40E-01 | 1.15E-01  | 6.31E-02 | 6.87E-02 | -3.17E-02 | 6.16E-02 | 6.08E-01 |
| acesulfame                                          | -1.27E-02 | 6.64E-02 | 8.49E-01 | 1.96E-02  | 6.42E-02 | 7.60E-01 | 4.52E-03  | 6.24E-02 | 9.42E-01 |
| valsartan                                           | 1.74E-02  | 5.99E-02 | 7.72E-01 | -1.28E-02 | 5.80E-02 | 8.26E-01 | -1.49E-02 | 5.63E-02 | 7.92E-01 |
| 6-hydroxyindole sulfate                             | -4.52E-02 | 6.54E-02 | 4.91E-01 | 2.83E-02  | 6.34E-02 | 6.56E-01 | -6.81E-02 | 6.14E-02 | 2.68E-01 |
| 4-methoxyphenol sulfate                             | 1.99E-01  | 6.23E-02 | 1.59E-03 | 2.73E-01  | 1.92E-02 | 6.13E-06 | 1.83E-01  | 5.86E-02 | 2.01E-03 |
| 2,4-dichlorophenol sulfate                          | 9.45E-04  | 6.54E-02 | 9.88E-01 | -4.80E-03 | 6.33E-02 | 9.40E-01 | -2.03E-02 | 6.15E-02 | 7.42E-01 |
| propyl 4-hydroxybenzoate sulfate                    | -1.27E-01 | 5.82E-02 | 2.97E-02 | -4.23E-02 | 5.68E-02 | 4.58E-01 | -1.05E-01 | 5.49E-02 | 5.63E-02 |
| ethylparaben sulfate                                | -6.40E-02 | 6.24E-02 | 3.06E-01 | -1.69E-01 | 5.96E-02 | 5.04E-03 | -7.59E-02 | 5.86E-02 | 1.96E-01 |
| umbelliferone sulfate                               | 4.73E-02  | 6.31E-02 | 4.54E-01 | 5.14E-02  | 6.10E-02 | 4.01E-01 | 7.86E-02  | 5.92E-02 | 1.85E-01 |

Supplementary Table 4: Parameter estimates for metabolome-wide association studies for diet-metabolite associations for each of: HEI-15, DASH and AMED diet, controlling for BMI

|                                                           |           |          |          |           |          |          |           |          |          |
|-----------------------------------------------------------|-----------|----------|----------|-----------|----------|----------|-----------|----------|----------|
| sphingomyelin (d18:1/20:0, d16:1/22:0)*                   | -6.54E-02 | 6.27E-02 | 2.98E-01 | -7.30E-02 | 6.06E-02 | 2.29E-01 | -9.19E-02 | 5.88E-02 | 1.19E-01 |
| sphingomyelin (d18:1/20:1, d18:2/20:0)*                   | -8.89E-02 | 5.85E-02 | 1.30E-01 | -5.06E-02 | 5.68E-02 | 3.73E-01 | -1.72E-02 | 5.52E-02 | 7.55E-01 |
| sphingomyelin (d18:1/20:2, d18:2/20:1, d16:1/22:2)*       | -1.59E-01 | 5.66E-02 | 5.20E-03 | -1.70E-01 | 5.46E-02 | 2.00E-03 | -1.62E-01 | 5.31E-02 | 2.50E-03 |
| behenoyl sphingomyelin (d18:1/22:0)*                      | -4.10E-02 | 6.62E-02 | 5.36E-01 | -9.43E-02 | 6.39E-02 | 1.41E-01 | -5.88E-04 | 6.23E-02 | 9.92E-01 |
| sphingomyelin (d18:1/22:1, d18:2/22:0, d16:1/24:1)*       | -3.38E-02 | 5.88E-02 | 5.66E-01 | -3.73E-02 | 5.69E-02 | 5.13E-01 | -9.17E-03 | 5.53E-02 | 8.69E-01 |
| sphingomyelin (d18:1/22:2, d18:2/22:1, d16:1/24:2)*       | -1.59E-01 | 6.00E-02 | 8.60E-03 | -1.93E-01 | 5.76E-02 | 8.98E-04 | -1.55E-01 | 5.63E-02 | 6.41E-03 |
| lignoceroyl sphingomyelin (d18:1/24:0)                    | 1.02E-01  | 6.42E-02 | 1.12E-01 | -1.92E-02 | 6.24E-02 | 7.59E-01 | 1.15E-01  | 6.02E-02 | 5.70E-02 |
| sphingomyelin (d17:1/16:0, d18:1/15:0, d16:1/17:0)*       | -1.72E-01 | 5.91E-02 | 3.96E-03 | -1.04E-01 | 5.77E-02 | 7.23E-02 | -1.89E-01 | 5.53E-02 | 7.19E-04 |
| dopamine 3-O-sulfate                                      | 2.26E-01  | 6.45E-02 | 5.26E-04 | 1.68E-01  | 6.30E-02 | 8.14E-03 | 1.07E-01  | 6.17E-02 | 8.45E-02 |
| 3-hydroxyhexanoate                                        | -4.47E-02 | 6.04E-02 | 4.59E-01 | -1.23E-02 | 5.85E-02 | 8.33E-01 | -3.34E-02 | 5.68E-02 | 5.57E-01 |
| N-carbamoylalanine                                        | 1.96E-01  | 6.23E-02 | 1.83E-03 | 2.26E-01  | 5.98E-02 | 1.89E-04 | 1.28E-01  | 5.91E-02 | 3.17E-02 |
| 3beta-hydroxy-5-cholestenoate                             | -6.19E-02 | 6.05E-02 | 3.07E-01 | -8.80E-02 | 5.84E-02 | 1.33E-01 | -6.48E-02 | 5.68E-02 | 2.55E-01 |
| 1,2,3-benzenetriol sulfate (2)                            | 1.02E-02  | 6.70E-02 | 8.79E-01 | -3.36E-02 | 6.48E-02 | 6.05E-01 | 2.59E-02  | 6.30E-02 | 6.81E-01 |
| 3-methoxycatechol sulfate (1)                             | 6.83E-02  | 6.53E-02 | 2.97E-01 | 6.09E-02  | 6.32E-02 | 3.36E-01 | 1.66E-01  | 6.07E-02 | 6.72E-03 |
| 3-methoxycatechol sulfate (2)                             | 1.16E-01  | 6.28E-02 | 6.50E-02 | 1.49E-01  | 6.05E-02 | 1.46E-02 | 7.41E-02  | 5.92E-02 | 2.12E-01 |
| N-acetylkynurenine (2)                                    | -1.21E-02 | 5.92E-02 | 8.38E-01 | -2.61E-02 | 5.72E-02 | 6.49E-01 | -2.08E-02 | 5.56E-02 | 7.08E-01 |
| C-glycosyltryptophan                                      | -5.98E-02 | 5.94E-02 | 3.15E-01 | 1.63E-02  | 5.76E-02 | 7.78E-01 | -1.24E-01 | 5.55E-02 | 2.56E-02 |
| tramadol                                                  | -3.67E-02 | 7.19E-02 | 6.10E-01 | -8.88E-02 | 6.94E-02 | 2.02E-01 | -3.63E-02 | 6.76E-02 | 5.91E-01 |
| O-desmethyltramadol                                       | -3.67E-02 | 7.19E-02 | 6.10E-01 | -8.88E-02 | 6.94E-02 | 2.02E-01 | -3.63E-02 | 6.76E-02 | 5.91E-01 |
| O-desmethyltramadol glucuronide                           | -3.67E-02 | 7.19E-02 | 6.10E-01 | -8.88E-02 | 6.94E-02 | 2.02E-01 | -3.63E-02 | 6.76E-02 | 5.91E-01 |
| arabitol/xylitol                                          | 8.54E-02  | 5.84E-02 | 1.45E-01 | 6.30E-02  | 5.67E-02 | 2.67E-01 | 4.17E-02  | 5.51E-02 | 4.50E-01 |
| N-acetylglucosamine/N-acetylgalactosamine                 | -6.61E-02 | 6.25E-02 | 2.92E-01 | -3.69E-02 | 6.06E-02 | 5.43E-01 | -9.41E-02 | 5.87E-02 | 1.10E-01 |
| citraconate/glutaconate                                   | 7.83E-02  | 6.14E-02 | 2.03E-01 | -4.09E-02 | 5.95E-02 | 4.93E-01 | 2.14E-02  | 5.79E-02 | 7.12E-01 |
| adipoylcarnitine (C6-DC)                                  | -2.21E-01 | 6.56E-02 | 8.73E-04 | -3.50E-02 | 6.48E-02 | 5.90E-01 | -1.55E-01 | 6.23E-02 | 1.33E-02 |
| nonanoylcarnitine (C9)                                    | -1.84E-01 | 6.48E-02 | 4.91E-03 | -1.75E-01 | 6.27E-02 | 5.62E-03 | -9.65E-02 | 6.15E-02 | 1.18E-01 |
| glycochenodeoxycholate 3-sulfate                          | -2.95E-02 | 6.11E-02 | 6.30E-01 | -4.31E-02 | 5.91E-02 | 4.67E-01 | -5.06E-02 | 5.74E-02 | 3.79E-01 |
| glycodeoxycholate 3-sulfate                               | 3.95E-02  | 6.33E-02 | 5.34E-01 | 4.23E-03  | 6.13E-02 | 9.45E-01 | -6.73E-02 | 5.95E-02 | 2.59E-01 |
| taurodeoxycholic acid 3-sulfate                           | -6.73E-03 | 6.60E-02 | 9.19E-01 | -6.15E-02 | 6.37E-02 | 3.36E-01 | -1.14E-01 | 6.16E-02 | 6.51E-02 |
| trans-3,4-methyleneheptanoate                             | -9.32E-02 | 6.62E-02 | 1.60E-01 | -4.85E-02 | 6.43E-02 | 4.51E-01 | -5.29E-02 | 6.24E-02 | 3.98E-01 |
| phenol glucuronide                                        | -7.20E-02 | 6.55E-02 | 2.73E-01 | -2.40E-02 | 6.36E-02 | 7.06E-01 | -8.52E-03 | 6.18E-02 | 8.90E-01 |
| linoleoyl ethanolamide                                    | -3.30E-02 | 6.22E-02 | 5.97E-01 | -1.72E-02 | 6.03E-02 | 7.75E-01 | 1.67E-03  | 5.85E-02 | 9.77E-01 |
| 1,2-dilinoeoyl-GPC (18:2/18:2)                            | 8.28E-02  | 6.15E-02 | 1.79E-01 | 1.11E-01  | 5.94E-02 | 6.16E-02 | 9.22E-02  | 5.78E-02 | 1.12E-01 |
| 1-stearoyl-2-oleoyl-GPC (18:0/18:1)                       | 4.35E-02  | 6.61E-02 | 5.12E-01 | -3.14E-02 | 6.40E-02 | 6.25E-01 | 7.48E-02  | 6.21E-02 | 2.30E-01 |
| 1-palmitoyl-2-arachidonoyl-GPC (16:0/20:4n6)              | -1.54E-01 | 6.41E-02 | 1.67E-02 | -3.05E-01 | 6.00E-02 | 6.93E-07 | -1.02E-01 | 6.06E-02 | 9.35E-02 |
| 1-palmitoyl-2-docosahexaenoyl-GPC (16:0/22:6)             | 5.67E-02  | 6.31E-02 | 3.70E-01 | -1.23E-01 | 6.07E-02 | 4.38E-02 | 9.66E-02  | 5.91E-02 | 1.04E-01 |
| 1-stearoyl-2-docosahexaenoyl-GPC (18:0/22:6)              | 9.06E-02  | 6.19E-02 | 1.44E-01 | -1.44E-02 | 6.01E-02 | 8.12E-01 | 1.39E-01  | 5.78E-02 | 1.66E-02 |
| 1-(1-enyl-stearoyl)-2-oleoyl-GPC (P-18:0/18:1)            | 1.73E-02  | 5.88E-02 | 7.69E-01 | -5.48E-02 | 5.68E-02 | 3.36E-01 | 4.73E-02  | 5.52E-02 | 3.92E-01 |
| 1-(1-enyl-stearoyl)-2-arachidonoyl-GPC (P-18:0/20:4)      | -1.25E-01 | 6.16E-02 | 4.32E-02 | -1.38E-01 | 5.95E-02 | 2.10E-02 | -8.36E-02 | 5.81E-02 | 1.52E-01 |
| 1-(1-enyl-stearoyl)-2-oleoyl-GPE (P-18:0/18:1)            | 3.35E-02  | 6.49E-02 | 6.06E-01 | -2.39E-02 | 6.28E-02 | 7.04E-01 | 7.10E-02  | 6.09E-02 | 2.45E-01 |
| sphingomyelin (d18:1/17:0, d17:1/18:0, d19:1/16:0)        | -2.03E-01 | 6.06E-02 | 9.32E-04 | -1.76E-01 | 5.89E-02 | 3.14E-03 | -1.73E-01 | 5.72E-02 | 2.66E-03 |
| 1-palmitoyl-2-stearoyl-GPC (16:0/18:0)                    | -1.85E-02 | 6.44E-02 | 7.74E-01 | -9.58E-02 | 6.21E-02 | 1.24E-01 | 6.29E-02  | 6.04E-02 | 2.99E-01 |
| 2-hydroxybutyrate/2-hydroxyisobutyrate                    | -2.21E-02 | 6.28E-02 | 7.26E-01 | -1.38E-01 | 6.03E-02 | 2.27E-02 | 2.99E-02  | 5.91E-02 | 6.12E-01 |
| oleate/vaccenate (18:1)                                   | -1.10E-01 | 6.01E-02 | 6.73E-02 | -1.23E-01 | 5.80E-02 | 3.48E-02 | -9.21E-02 | 5.65E-02 | 1.05E-01 |
| isoleucylleucine/leucylisoleucine                         | 5.41E-02  | 6.45E-02 | 4.02E-01 | 1.26E-01  | 6.20E-02 | 4.40E-02 | 9.89E-02  | 6.04E-02 | 1.03E-01 |
| aripiprazole                                              | -7.69E-02 | 7.11E-02 | 2.80E-01 | -2.98E-02 | 6.89E-02 | 6.66E-01 | -2.28E-02 | 6.70E-02 | 7.34E-01 |
| rivaroxaban                                               | 7.74E-02  | 7.25E-02 | 2.87E-01 | 8.29E-03  | 7.03E-02 | 9.06E-01 | 5.13E-02  | 6.82E-02 | 4.52E-01 |
| leucylphenylalanine/isoleucylphenylalanine                | 1.10E-01  | 6.75E-02 | 1.04E-01 | 9.18E-02  | 6.54E-02 | 1.62E-01 | 7.01E-02  | 6.36E-02 | 2.71E-01 |
| 1-palmitoleoylglycerol (16:1)*                            | 4.02E-02  | 6.37E-02 | 5.28E-01 | -5.67E-02 | 6.16E-02 | 3.58E-01 | -6.35E-02 | 5.98E-02 | 2.89E-01 |
| palmitoyl dihydrosphingomyelin (d18:0/16:0)*              | 6.25E-02  | 6.25E-02 | 3.18E-01 | -1.14E-01 | 6.02E-02 | 5.83E-02 | 1.05E-01  | 5.85E-02 | 7.45E-02 |
| tricosanoyl sphingomyelin (d18:1/23:0)*                   | 2.54E-02  | 6.10E-02 | 6.77E-01 | -8.11E-02 | 5.88E-02 | 1.69E-01 | 1.68E-02  | 5.73E-02 | 7.70E-01 |
| sphingomyelin (d18:2/23:0, d18:1/23:1, d17:1/24:1)*       | -4.11E-02 | 5.50E-02 | 4.56E-01 | -8.71E-02 | 5.31E-02 | 1.02E-01 | -9.78E-04 | 5.18E-02 | 9.85E-01 |
| sphingomyelin (d18:2/24:1, d18:1/24:2)*                   | -6.14E-02 | 5.76E-02 | 2.88E-01 | -1.76E-01 | 5.49E-02 | 1.54E-03 | 1.81E-03  | 5.43E-02 | 9.70E-01 |
| diclofenac                                                | 5.22E-02  | 7.22E-02 | 4.71E-01 | -2.15E-04 | 7.00E-02 | 9.98E-01 | -5.14E-02 | 6.79E-02 | 4.50E-01 |
| 1-stearoyl-2-linoeoyl-GPE (18:0/18:2)*                    | 1.09E-01  | 6.54E-02 | 9.60E-02 | 6.47E-02  | 6.35E-02 | 3.09E-01 | 1.17E-01  | 6.14E-02 | 5.68E-02 |
| 1-stearoyl-2-arachidonoyl-GPE (18:0/20:4)                 | 3.03E-02  | 6.64E-02 | 6.48E-01 | -3.43E-02 | 6.42E-02 | 5.94E-01 | 6.19E-02  | 6.23E-02 | 3.21E-01 |
| 1-stearoyl-2-linoeoyl-GPC (18:0/18:2)*                    | 2.33E-02  | 6.32E-02 | 7.13E-01 | 2.23E-02  | 6.12E-02 | 7.16E-01 | 8.98E-02  | 5.92E-02 | 1.31E-01 |
| 1-palmitoyl-2-palmitoleoyl-GPC (16:0/16:1)*               | -8.80E-02 | 6.28E-02 | 1.62E-01 | -2.06E-01 | 5.97E-02 | 6.46E-04 | -9.91E-02 | 5.90E-02 | 9.38E-02 |
| 1-palmitoyl-2-eicosapentaenoyl-GPC (16:0/20:5)*           | 6.27E-02  | 6.52E-02 | 3.38E-01 | -9.79E-02 | 6.30E-02 | 1.21E-01 | 1.09E-01  | 6.11E-02 | 7.61E-02 |
| 1-palmitoyl-2-arachidonoyl-GPE (16:0/20:4)*               | 3.38E-02  | 6.61E-02 | 6.10E-01 | -9.04E-02 | 6.37E-02 | 1.57E-01 | 3.64E-02  | 6.21E-02 | 5.59E-01 |
| 1-palmitoyl-2-docosahexaenoyl-GPE (16:0/22:6)*            | 8.66E-02  | 6.52E-02 | 1.85E-01 | -7.21E-02 | 6.32E-02 | 2.55E-01 | 8.86E-02  | 6.13E-02 | 1.50E-01 |
| 1-stearoyl-2-docosahexaenoyl-GPE (18:0/22:6)*             | 6.09E-02  | 6.46E-02 | 3.47E-01 | -4.28E-02 | 6.26E-02 | 4.95E-01 | 5.17E-02  | 6.07E-02 | 3.95E-01 |
| 1-palmitoyl-2-arachidonoyl-GPI (16:0/20:4)*               | -2.14E-02 | 6.56E-02 | 7.45E-01 | -9.36E-02 | 6.32E-02 | 1.40E-01 | -2.98E-02 | 6.16E-02 | 6.29E-01 |
| 1-stearoyl-2-linoeoyl-GPI (18:0/18:2)                     | 1.17E-01  | 6.19E-02 | 5.89E-02 | 1.41E-02  | 6.03E-02 | 8.16E-01 | 1.50E-01  | 5.79E-02 | 1.01E-02 |
| 1-palmitoyl-2-palmitoleoyl-GPE (16:0/16:1)*               | 2.41E-03  | 6.28E-02 | 9.69E-01 | -8.00E-02 | 6.06E-02 | 1.88E-01 | -4.50E-02 | 5.90E-02 | 4.46E-01 |
| gamma-tocopherol/beta-tocopherol                          | -1.38E-01 | 6.59E-02 | 3.78E-02 | -1.34E-01 | 6.38E-02 | 3.66E-02 | -3.15E-02 | 6.24E-02 | 6.14E-01 |
| 1-(1-enyl-stearoyl)-2-arachidonoyl-GPE (P-18:0/20:4)*     | -1.52E-01 | 5.99E-02 | 1.18E-02 | -1.95E-01 | 5.74E-02 | 7.64E-04 | -5.48E-02 | 5.68E-02 | 3.36E-01 |
| 1-(1-enyl-palmitoyl)-2-docosahexaenoyl-GPE (P-16:0/22:6)* | 5.44E-02  | 6.06E-02 | 3.70E-01 | -1.02E-01 | 5.84E-02 | 8.14E-02 | 1.28E-01  | 5.65E-02 | 2.37E-02 |
| 1-(1-enyl-palmitoyl)-2-arachidonoyl-GPE (P-18:0/20:4)*    | -3.11E-02 | 6.26E-02 | 6.19E-01 | -1.11E-01 | 6.02E-02 | 6.60E-02 | -6.51E-03 | 5.89E-02 | 9.12E-01 |
| 1-(1-enyl-oleoyl)-2-linoeoyl-GPE (P-18:1/18:2)*           | 4.31E-02  | 6.45E-02 | 5.04E-01 | 3.01E-02  | 6.24E-02 | 6.30E-01 | 1.06E-01  | 6.03E-02 | 8.10E-02 |
| 1-(1-enyl-stearoyl)-2-docosahexaenoyl-GPE (P-18:0/22:6)*  | 3.98E-02  | 5.99E-02 | 5.06E-01 | -6.57E-02 | 5.79E-02 | 2.57E-01 | 1.40E-01  | 5.57E-02 | 1.24E-02 |
| 1-(1-enyl-palmitoyl)-2-oleoyl-GPE (P-16:0/18:1)*          | 7.68E-02  | 6.49E-02 | 2.38E-01 | -1.31E-02 | 6.30E-02 | 8.35E-01 | 1.06E-01  | 6.09E-02 | 8.26E-02 |
| 1-(1-enyl-palmitoyl)-2-dihomo-linoeoyl-GPC (P-16:0/20:3)* | 2.91E-02  | 6.62E-02 | 6.61E-01 | -5.61E-02 | 6.40E-02 | 3.81E-01 | -4.52E-02 | 6.22E-02 | 4.67E-01 |
| 1-(1-enyl-palmitoyl)-2-oleoyl-GPC (P-16:0/18:1)*          | 1.31E-02  | 5.78E-02 | 8.21E-01 | -7.04E-02 | 5.58E-02 | 2.08E-01 | 5.36E-02  | 5.43E-02 | 3.24E-01 |
| 1-(1-enyl-palmitoyl)-2-docosahexaenoyl-GPC (P-16:0/22:6)* | 8.47E-02  | 6.06E-02 | 1.63E-01 | -8.07E-02 | 5.87E-02 | 1.70E-01 | 1.51E-01  | 5.65E-02 | 7.99E-03 |
| 1-(1-enyl-palmitoyl)-2-linoeoyl-GPC (P-16:0/18:2)*        | -2.11E-02 | 6.12E-02 | 7.31E-01 | -9.49E-03 | 5.93E-02 | 8.73E-01 | 4.75E-02  | 5.75E-02 | 4.10E-01 |
| 1-(1-enyl-palmitoyl)-2-arachidonoyl-GPC (P-16:0/20:4)*    | -1.23E-01 | 6.02E-02 | 4.19E-02 | -2.07E-01 | 5.73E-02 | 3.61E-04 | -7.65E-02 | 5.68E-02 | 1.79E-01 |
| 1-(1-enyl-stearoyl)-2-docosahexaenoyl-GPC (P-18:0/22:6)*  | 5.87E-02  | 5.83E-02 | 3.15E-01 | -3.84E-02 | 5.65E-02 | 4.97E-01 | 1.38E-01  | 5.43E-02 | 1.18E-02 |
| 1-stearoyl-2-arachidonoyl-GPC (O-18:0/20:4)*              | -2.30E-01 | 6.32E-02 | 3.19E-04 | -1.04E-01 | 6.23E-02 | 9.64E-02 | -2.40E-01 | 5.91E-02 | 6.37E-05 |
| 1-palmitoyl-2-oleoyl-GPC (O-16:0/18:1)*                   | -5.32E-02 | 6.26E-02 | 3.96E-01 | -7.02E-02 | 6.05E-02 | 2.47E-01 | -3.63E-02 | 5.88E-02 | 5.37E-01 |
| 1-palmitoyl-2-arachidonoyl-GPC (O-16:0/20:4)*             | -1.78E-01 | 6.14E-02 | 4.02E-03 | -2.16E-01 | 5.89E-02 | 2.93E-04 | -1.26E-01 | 5.81E-02 | 3.06E-02 |
| sphingomyelin (d18:1/21:0, d17:1/22:0, d16:1/23:0)*       | -2.32E-02 | 5.88E-02 | 6.93E-01 | -2.18E-02 | 5.69E-02 | 7.01E-01 | -7.04E-02 | 5.51E-02 | 2.02E-01 |
| behenoyl dihydrosphingomyelin (d18:0/22:0)*               | -7.42E-03 | 6.57E-02 | 9.10E-01 | -1.68E-01 | 6.27E-02 | 7.77E-03 | 2.72E-02  | 6.17E-02 | 6.59E-01 |

Supplementary Table 4: Parameter estimates for metabolome-wide association studies for diet-metabolite associations for each of: HEI-15, DASH and AMED diet, controlling for BMI

|                                                            |           |          |          |           |          |          |           |          |          |
|------------------------------------------------------------|-----------|----------|----------|-----------|----------|----------|-----------|----------|----------|
| sphingomyelin (d18:0/18:0, d19:0/17:0)*                    | -2.24E-01 | 6.28E-02 | 4.23E-04 | -3.81E-01 | 5.78E-02 | 2.24E-10 | -1.49E-01 | 5.97E-02 | 1.32E-02 |
| N-palmitoyl-sphinganine (d18:0/16:0)                       | -2.25E-03 | 6.46E-02 | 9.72E-01 | -1.37E-01 | 6.20E-02 | 2.76E-02 | 3.85E-02  | 6.07E-02 | 5.26E-01 |
| lactosyl-N-palmitoyl-sphingosine (d18:1/16:0)              | -1.02E-01 | 6.21E-02 | 1.02E-01 | -2.99E-02 | 6.04E-02 | 6.21E-01 | -6.68E-02 | 5.85E-02 | 2.55E-01 |
| cetirizine                                                 | 8.17E-02  | 6.40E-02 | 2.03E-01 | 5.95E-02  | 6.20E-02 | 3.39E-01 | 1.62E-02  | 6.04E-02 | 7.88E-01 |
| 1-pentadecanoyl-2-linoleoyl-GPC (15:0/18:2)*               | -8.26E-02 | 5.66E-02 | 1.46E-01 | 4.47E-02  | 5.49E-02 | 4.17E-01 | -1.28E-01 | 5.29E-02 | 1.62E-02 |
| 1-margaroyl-2-oleoyl-GPC (17:0/18:1)*                      | 6.94E-02  | 6.12E-02 | 2.57E-01 | 6.91E-02  | 5.92E-02 | 2.44E-01 | 5.45E-02  | 5.75E-02 | 3.44E-01 |
| 1-margaroyl-2-linoleoyl-GPC (17:0/18:2)*                   | 8.55E-02  | 5.91E-02 | 1.50E-01 | 1.93E-01  | 5.63E-02 | 6.83E-04 | 9.11E-02  | 5.55E-02 | 1.02E-01 |
| myristoyl dihydrospingomyelin (d18:0/14:0)*                | -4.39E-02 | 6.02E-02 | 4.66E-01 | -1.02E-01 | 5.80E-02 | 7.93E-02 | -6.72E-02 | 5.65E-02 | 2.35E-01 |
| 5-hydroxyindole sulfate                                    | -1.28E-02 | 6.53E-02 | 8.45E-01 | 3.04E-02  | 6.32E-02 | 6.31E-01 | -4.37E-02 | 6.13E-02 | 4.77E-01 |
| 7-hydroxyindole sulfate                                    | 5.67E-02  | 6.25E-02 | 3.65E-01 | 5.94E-02  | 6.05E-02 | 3.27E-01 | 6.98E-02  | 5.87E-02 | 2.35E-01 |
| phenylacetylglutamate                                      | -4.00E-02 | 6.41E-02 | 5.33E-01 | 5.44E-02  | 6.20E-02 | 3.81E-01 | -2.48E-02 | 6.03E-02 | 6.81E-01 |
| 1-stearoyl-2-dihomo-linolenoyl-GPC (18:0/20:3n3 or 6)*     | 8.75E-02  | 6.21E-02 | 1.60E-01 | 3.27E-02  | 6.02E-02 | 5.88E-01 | -1.07E-02 | 5.85E-02 | 8.55E-01 |
| palmitoyl-linoleoyl-glycerol (16:0/18:2) [1]*              | 4.67E-02  | 6.19E-02 | 4.51E-01 | 2.16E-02  | 6.00E-02 | 7.19E-01 | -1.45E-02 | 5.83E-02 | 8.03E-01 |
| palmitoyl-linoleoyl-glycerol (16:0/18:2) [2]*              | -1.96E-04 | 6.19E-02 | 9.97E-01 | -4.10E-02 | 5.99E-02 | 4.94E-01 | -5.55E-02 | 5.81E-02 | 3.40E-01 |
| 1-palmitoyl-2-oleoyl-GPI (16:0/18:1)*                      | 3.96E-02  | 6.61E-02 | 5.50E-01 | -6.63E-02 | 6.39E-02 | 3.01E-01 | 4.35E-02  | 6.22E-02 | 4.85E-01 |
| 1-stearoyl-2-docosahexaenoyl-GPI (18:0/22:6)*              | 5.26E-02  | 6.64E-02 | 4.29E-01 | -7.93E-02 | 6.41E-02 | 2.18E-01 | 9.84E-02  | 6.22E-02 | 1.15E-01 |
| 1-(1-enyl-palmitoyl)-2-linoleoyl-GPE (P-16:0/18:2)*        | -2.18E-02 | 6.53E-02 | 7.39E-01 | 1.67E-02  | 6.32E-02 | 7.92E-01 | 6.19E-03  | 6.14E-02 | 9.20E-01 |
| 1-oleoyl-2-linoleoyl-GPE (18:1/18:2)*                      | 2.22E-01  | 6.23E-02 | 4.36E-04 | 2.07E-01  | 6.04E-02 | 7.00E-04 | 1.79E-01  | 5.90E-02 | 2.66E-03 |
| 1-pentadecanoyl-2-arachidonoyl-GPC (15:0/20:4)*            | -1.37E-01 | 6.24E-02 | 2.87E-02 | -4.52E-02 | 6.08E-02 | 4.58E-01 | -1.81E-01 | 5.81E-02 | 2.10E-03 |
| 1-pentadecanoyl-2-docosahexaenoyl-GPC (15:0/22:6)*         | 5.45E-02  | 6.00E-02 | 6.65E-01 | 5.67E-02  | 5.81E-02 | 3.30E-01 | 5.08E-02  | 5.64E-02 | 3.68E-01 |
| 1-margaroyl-2-arachidonoyl-GPC (17:0/20:4)*                | -1.10E-01 | 6.43E-02 | 8.88E-02 | -2.86E-02 | 6.25E-02 | 6.47E-01 | -1.16E-01 | 6.04E-02 | 5.51E-02 |
| 1-arachidoyl-2-arachidonoyl-GPC (20:0/20:4)*               | 1.29E-01  | 6.51E-02 | 4.93E-02 | 5.64E-02  | 6.34E-02 | 3.75E-01 | 1.18E-01  | 6.13E-02 | 5.55E-02 |
| 1-oleoyl-2-docosahexaenoyl-GPC (18:1/22:6)*                | 2.02E-01  | 5.77E-02 | 5.54E-04 | 1.34E-01  | 5.65E-02 | 1.89E-02 | 1.91E-01  | 5.43E-02 | 5.20E-04 |
| 1-linoleoyl-2-arachidonoyl-GPC (18:2/20:4n6)*              | 6.38E-02  | 6.20E-02 | 3.04E-01 | -2.11E-02 | 6.01E-02 | 7.26E-01 | 8.55E-02  | 5.82E-02 | 1.43E-01 |
| 1-linoleoyl-2-docosahexaenoyl-GPC (18:2/22:6)*             | 1.56E-01  | 5.73E-02 | 6.84E-03 | -2.24E-03 | 5.62E-02 | 9.68E-01 | 1.84E-01  | 5.34E-02 | 6.41E-04 |
| 1-palmitoyl-2-linoleoyl-GPC (O-16:0/18:2)*                 | -7.09E-02 | 6.37E-02 | 2.67E-01 | -9.31E-02 | 6.16E-02 | 1.32E-01 | -3.61E-02 | 6.00E-02 | 5.48E-01 |
| 1-(1-enyl-stearoyl)-2-linoleoyl-GPC (P-18:0/18:2)*         | -2.65E-02 | 6.05E-02 | 6.61E-01 | -4.63E-02 | 4.29E-01 | 4.29E-02 | 5.68E-02  | 4.51E-01 |          |
| 1-myristoyl-2-linoleoyl-GPC (14:0/18:2)*                   | -2.95E-02 | 6.35E-02 | 6.42E-01 | -5.80E-02 | 6.14E-02 | 3.46E-01 | -5.05E-02 | 5.97E-02 | 3.98E-01 |
| 1-myristoyl-2-arachidonoyl-GPC (14:0/20:4)*                | 1.44E-02  | 6.44E-02 | 8.23E-01 | -1.13E-01 | 6.19E-02 | 6.94E-02 | -8.51E-03 | 6.05E-02 | 8.88E-01 |
| 1-myristoyl-2-docosahexaenoyl-GPC (14:0/22:6)*             | 1.43E-01  | 6.23E-02 | 2.20E-02 | -1.37E-03 | 6.08E-02 | 9.82E-01 | 1.61E-01  | 5.83E-02 | 6.16E-03 |
| 1-stearoyl-2-docosapentaenoyl-GPC (18:0/22:5n3)*           | 3.43E-02  | 6.57E-02 | 6.02E-01 | 7.83E-02  | 6.34E-02 | 2.18E-01 | 2.67E-02  | 6.18E-02 | 6.65E-01 |
| 1-stearoyl-2-docosapentaenoyl-GPC (18:0/22:5n6)*           | -1.56E-01 | 5.99E-02 | 9.76E-03 | -1.36E-01 | 5.81E-02 | 2.02E-02 | -2.34E-01 | 5.52E-02 | 3.17E-05 |
| 1-palmitoyl-2-adrenoyl-GPC (16:0/22:4)*                    | -9.54E-02 | 6.32E-02 | 1.32E-01 | -1.29E-01 | 6.09E-02 | 3.53E-02 | -1.31E-01 | 5.91E-02 | 2.78E-02 |
| 1-stearoyl-2-adrenoyl-GPC (18:0/22:4)*                     | -1.26E-01 | 5.81E-02 | 3.11E-02 | -1.34E-01 | 5.61E-02 | 1.74E-02 | -1.26E-01 | 5.45E-02 | 2.12E-02 |
| 1-stearoyl-GPC (O-18:0)*                                   | 3.17E-03  | 6.23E-02 | 5.99E-01 | 2.20E-02  | 6.03E-02 | 7.15E-01 | -1.79E-02 | 5.86E-02 | 7.60E-01 |
| 1-myristoyl-2-palmitoleoyl-GPC (14:0/16:1)*                | -3.57E-02 | 6.36E-02 | 5.75E-01 | -7.29E-02 | 6.14E-02 | 2.36E-01 | -7.60E-02 | 5.96E-02 | 2.04E-01 |
| 1-stearoyl-2-meadoyl-GPC (18:0/20:3n9)*                    | -2.92E-02 | 6.47E-02 | 6.52E-01 | -8.53E-02 | 6.24E-02 | 1.73E-01 | -4.01E-02 | 6.08E-02 | 5.10E-01 |
| 1-(1-enyl-palmitoyl)-2-palmitoleoyl-GPC (P-16:0/16:1)*     | -4.75E-02 | 6.32E-02 | 4.53E-01 | -1.88E-01 | 6.02E-02 | 1.93E-03 | -2.49E-03 | 5.95E-02 | 9.67E-01 |
| 1-(1-enyl-palmitoyl)-2-myristoyl-GPC (P-16:0/14:0)*        | -1.83E-01 | 6.43E-02 | 4.83E-03 | -1.42E-01 | 6.26E-02 | 2.41E-02 | -1.13E-01 | 6.09E-02 | 6.38E-02 |
| 1-(1-enyl-palmitoyl)-2-palmitoyl-GPC (P-16:0/16:0)*        | -1.36E-01 | 6.29E-02 | 3.17E-02 | -2.02E-01 | 6.02E-02 | 9.10E-04 | -5.19E-02 | 5.95E-02 | 3.84E-01 |
| phosphatidylcholine (16:0/22:5n3, 18:1/20:4)*              | 2.10E-02  | 6.30E-02 | 7.39E-01 | 3.92E-02  | 6.10E-02 | 5.20E-01 | 8.12E-02  | 5.91E-02 | 1.70E-01 |
| phosphatidylcholine (18:0/20:5, 16:0/22:5n6)*              | 6.75E-02  | 6.73E-02 | 3.17E-01 | -5.30E-02 | 6.51E-02 | 4.17E-01 | 6.66E-02  | 6.32E-02 | 2.93E-01 |
| 1-palmitoyl-2-docosahexaenoyl-GPI (16:0/22:6)*             | 3.12E-02  | 6.71E-02 | 6.42E-01 | -3.86E-02 | 6.49E-02 | 5.52E-01 | 6.92E-02  | 6.29E-02 | 2.72E-01 |
| 1-stearoyl-2-oleoyl-GPI (18:0/18:1)*                       | 2.05E-01  | 6.44E-02 | 1.62E-03 | 1.25E-01  | 6.30E-02 | 4.85E-02 | 1.78E-01  | 6.07E-02 | 3.58E-03 |
| 1-stearoyl-2-dihomo-linolenoyl-GPI (18:0/20:3n3 or 6)*     | 1.39E-01  | 6.25E-02 | 2.65E-02 | 4.48E-02  | 6.10E-02 | 4.63E-01 | 7.14E-02  | 5.91E-02 | 2.28E-01 |
| 1-stearoyl-GPE (O-18:0)*                                   | 4.02E-02  | 6.36E-02 | 5.28E-01 | 3.94E-02  | 6.16E-02 | 5.23E-01 | 7.64E-02  | 5.97E-02 | 2.02E-01 |
| 1,2-dipalmitoyl-GPE (16:0/16:0)*                           | 6.50E-02  | 6.43E-02 | 3.12E-01 | -3.16E-02 | 6.23E-02 | 6.12E-01 | -2.89E-02 | 6.05E-02 | 6.33E-01 |
| 1-palmitoyl-2-stearoyl-GPE (16:0/18:0)*                    | 3.27E-02  | 6.41E-02 | 6.11E-01 | 3.73E-02  | 6.20E-02 | 5.48E-01 | 5.81E-02  | 6.02E-02 | 3.36E-01 |
| 1-palmitoyl-2-eicosapentaenoyl-GPE (16:0/20:5)*            | 9.08E-02  | 6.33E-02 | 1.52E-01 | -4.04E-05 | 6.15E-02 | 9.99E-01 | 9.50E-02  | 5.94E-02 | 1.11E-01 |
| 1-stearoyl-2-dihomo-linolenoyl-GPE (18:0/20:3n3 or 6)*     | 1.76E-01  | 6.46E-02 | 6.77E-03 | 1.18E-01  | 6.29E-02 | 6.08E-02 | 8.87E-02  | 6.13E-02 | 1.49E-01 |
| 1,2-dilinoleoyl-GPE (18:2/18:2)*                           | 5.46E-02  | 6.40E-02 | 3.94E-01 | 7.43E-02  | 6.18E-02 | 2.31E-01 | 9.20E-03  | 6.02E-02 | 8.79E-01 |
| 1-oleoyl-2-arachidonoyl-GPE (18:1/20:4)*                   | 1.24E-01  | 6.67E-02 | 6.51E-02 | 9.97E-02  | 6.47E-02 | 1.25E-01 | 1.41E-01  | 6.26E-02 | 2.51E-02 |
| 1-(1-enyl-stearoyl)-2-linoleoyl-GPE (P-18:0/18:2)*         | -2.21E-02 | 6.41E-02 | 7.31E-01 | -7.85E-03 | 6.21E-02 | 8.99E-01 | 4.61E-02  | 6.02E-02 | 4.44E-01 |
| 1-linoleoyl-GPG (18:2)*                                    | -1.72E-02 | 6.48E-02 | 7.91E-01 | -1.26E-03 | 6.27E-02 | 9.84E-01 | -5.93E-02 | 6.08E-02 | 3.30E-01 |
| thioproline                                                | -1.57E-01 | 6.14E-02 | 1.11E-02 | -1.56E-01 | 5.94E-02 | 8.85E-03 | -7.97E-02 | 5.82E-02 | 1.72E-01 |
| palmitoylcholine                                           | 1.39E-01  | 6.35E-02 | 3.01E-02 | 1.29E-01  | 6.15E-02 | 3.63E-02 | 1.40E-01  | 5.97E-02 | 1.94E-02 |
| trans-3,4-methyleneheptanoylcarnitine                      | -1.09E-01 | 6.37E-02 | 8.69E-02 | -2.69E-02 | 6.20E-02 | 6.65E-01 | -3.77E-02 | 6.02E-02 | 5.31E-01 |
| glycocholate glucuronide (1)                               | -1.38E-02 | 6.27E-02 | 8.26E-01 | -2.74E-03 | 6.07E-02 | 9.64E-01 | -9.67E-03 | 5.89E-02 | 8.70E-01 |
| glycochenodeoxycholate glucuronide (1)                     | -6.45E-02 | 5.99E-02 | 2.83E-01 | -9.18E-02 | 5.79E-02 | 1.14E-01 | -8.10E-02 | 5.63E-02 | 1.51E-01 |
| (S)-3-hydroxybutyrylcarnitine                              | -9.40E-02 | 6.13E-02 | 1.26E-01 | -1.88E-02 | 5.96E-02 | 7.53E-01 | -4.78E-02 | 5.78E-02 | 4.09E-01 |
| glycosyl-N-palmitoyl-sphingosine (d18:1/16:0)              | -1.79E-01 | 6.46E-02 | 5.94E-03 | -1.80E-01 | 6.25E-02 | 4.29E-03 | -9.70E-02 | 6.13E-02 | 1.15E-01 |
| catechol glucuronide                                       | 2.36E-01  | 6.22E-02 | 1.88E-04 | 1.88E-01  | 6.07E-02 | 2.11E-03 | 1.41E-01  | 5.94E-02 | 1.83E-02 |
| ascorbic acid 2-sulfate                                    | 2.24E-01  | 6.03E-02 | 2.46E-04 | 2.49E-01  | 5.79E-02 | 2.35E-05 | 9.86E-02  | 5.77E-02 | 8.88E-02 |
| oleoylcholine                                              | 1.83E-01  | 6.28E-02 | 3.82E-03 | 1.83E-01  | 6.07E-02 | 2.85E-03 | 1.69E-01  | 5.91E-02 | 4.56E-03 |
| arachidonoylcholine                                        | 9.99E-02  | 6.36E-02 | 1.17E-01 | 9.60E-02  | 6.16E-02 | 1.20E-01 | 1.22E-01  | 5.96E-02 | 4.12E-02 |
| docosahexaenoylcholine                                     | 1.84E-01  | 6.09E-02 | 2.81E-03 | 1.19E-01  | 5.95E-02 | 4.56E-02 | 2.09E-01  | 5.69E-02 | 2.89E-04 |
| palmitoleoylcholine                                        | 8.36E-02  | 6.35E-02 | 1.89E-01 | 3.28E-02  | 6.16E-02 | 5.95E-01 | 5.28E-02  | 5.98E-02 | 3.78E-01 |
| dihomo-linolenoyl-choline                                  | 1.99E-01  | 6.37E-02 | 2.00E-03 | 1.91E-01  | 6.17E-02 | 2.20E-03 | 1.13E-01  | 6.05E-02 | 4.72E-02 |
| caffeic acid sulfate                                       | 1.55E-01  | 6.42E-02 | 1.67E-02 | 1.04E-01  | 6.25E-02 | 9.76E-02 | 1.15E-01  | 6.06E-02 | 5.91E-02 |
| 1-linoleoyl-2-linolenoyl-GPC (18:2/18:3)*                  | 8.80E-02  | 6.12E-02 | 1.52E-01 | 8.10E-02  | 5.92E-02 | 1.72E-01 | 1.40E-01  | 5.71E-02 | 1.47E-02 |
| 1-palmitoleoyl-2-linolenoyl-GPC (16:1/18:3)*               | -2.15E-02 | 6.25E-02 | 7.31E-01 | -2.15E-02 | 6.05E-02 | 7.23E-01 | 1.83E-02  | 5.87E-02 | 7.55E-01 |
| phosphatidylcholine (14:0/14:0, 16:0/12:0)                 | -4.61E-02 | 6.56E-02 | 4.83E-01 | -5.60E-02 | 6.34E-02 | 3.78E-01 | -8.20E-02 | 6.15E-02 | 1.84E-01 |
| phosphatidylcholine (15:0/18:1, 17:0/16:1, 16:0/17:1)*     | -8.79E-02 | 5.95E-02 | 1.41E-01 | -6.78E-02 | 5.77E-02 | 2.41E-01 | -1.25E-01 | 5.57E-02 | 2.60E-02 |
| 1-oleoyl-2-dihomo-linoleoyl-GPC (18:1/20:2)*               | 1.67E-01  | 6.37E-02 | 9.24E-03 | 1.38E-01  | 6.18E-02 | 2.61E-02 | 8.61E-02  | 6.04E-02 | 1.55E-01 |
| 1-oleoyl-2-docosapentaenoyl-GPC (18:1/22:5n3)*             | 1.14E-01  | 6.30E-02 | 7.06E-02 | 1.36E-01  | 6.08E-02 | 2.59E-02 | 7.82E-02  | 5.94E-02 | 1.89E-01 |
| phosphatidylcholine (18:0/20:2, 20:0/18:2)*                | 2.88E-01  | 6.44E-02 | 1.14E-05 | 1.47E-01  | 6.39E-02 | 2.26E-02 | 2.31E-01  | 6.11E-02 | 1.90E-04 |
| 1-(1-enyl-oleoyl)-2-docosahexaenoyl-GPE (P-18:1/22:6)*     | 1.48E-01  | 5.98E-02 | 1.39E-02 | -8.75E-03 | 5.85E-02 | 8.81E-01 | 2.37E-01  | 5.50E-02 | 2.23E-05 |
| 1-(1-enyl-stearoyl)-2-dihomo-linolenoyl-GPE (P-18:0/20:3)* | -4.08E-02 | 6.53E-02 | 5.33E-01 | -5.99E-02 | 6.32E-02 | 3.44E-01 | -8.10E-02 | 6.13E-02 | 1.87E-01 |
| lisinopril                                                 | -4.50E-02 | 5.88E-02 | 4.45E-01 | -9.48E-04 | 5.69E-02 | 9.87E-01 | 6.92E-02  | 5.52E-02 | 2.10E-01 |
| lamotrigine                                                | -6.09E-03 | 7.25E-02 | 9.33E-01 | -9.60E-02 | 7.00E-02 | 1.71E-01 | -9.11E-03 | 6.82E-02 | 8.94E-01 |
| hexadecatrienoate (16:3n3)                                 | 1.75E-01  | 6.27E-02 | 5.59E-03 | 1.38E-01  | 6.10E-02 | 2.40E-02 | 1.32E-01  | 5.92E-02 | 2.69E-02 |
| hexadecadienoate (16:2n6)                                  | -1.56E-01 | 5.97E-02 | 9.32E-03 | -1.32E-01 | 5.80E-02 | 2.39E-02 | -9.43E-02 | 5.65E-02 | 9.64E-02 |

Supplementary Table 4: Parameter estimates for metabolome-wide association studies for diet-metabolite associations for each of: HEI-15, DASH and AMED diet, controlling for BMI

|                                                                 |           |          |          |           |          |          |           |          |          |
|-----------------------------------------------------------------|-----------|----------|----------|-----------|----------|----------|-----------|----------|----------|
| 1-myristoyl-2-eicosapentaenoyl-GPC (14:0/20:5)*                 | 1.14E-01  | 6.30E-02 | 7.05E-02 | -9.42E-03 | 6.14E-02 | 8.78E-01 | 1.30E-01  | 5.91E-02 | 2.83E-02 |
| palmitoleoylcarnitine (C16:1)*                                  | -1.49E-01 | 6.06E-02 | 1.47E-02 | -2.11E-01 | 5.79E-02 | 3.13E-04 | -1.06E-01 | 5.72E-02 | 6.48E-02 |
| 4-acetamidobenzoate                                             | 1.40E-01  | 6.28E-02 | 2.66E-02 | 1.73E-01  | 6.04E-02 | 4.52E-03 | 1.44E-01  | 5.89E-02 | 1.52E-02 |
| 4-hydroxyphenylacetylglutamine                                  | 3.61E-02  | 6.30E-02 | 5.67E-01 | 7.16E-02  | 6.09E-02 | 2.41E-01 | 7.54E-02  | 5.91E-02 | 2.03E-01 |
| 4-aminophenol sulfate (2)                                       | 1.61E-01  | 7.25E-02 | 2.73E-02 | 1.47E-01  | 7.03E-02 | 3.76E-02 | 7.41E-02  | 6.86E-02 | 2.81E-01 |
| 2'-O-methyluridine                                              | -1.05E-01 | 6.32E-02 | 9.64E-02 | -6.53E-03 | 6.15E-02 | 9.16E-01 | -7.97E-02 | 5.95E-02 | 1.81E-01 |
| gamma-glutamyl-alpha-lysine                                     | -3.35E-02 | 6.38E-02 | 6.00E-01 | -2.40E-03 | 6.18E-02 | 9.69E-01 | -7.06E-02 | 5.99E-02 | 2.40E-01 |
| palmitoyl-oleoyl-glycerol (16:0/18:1) [1]*                      | 1.72E-02  | 6.24E-02 | 7.83E-01 | -5.23E-02 | 6.04E-02 | 3.87E-01 | -5.42E-02 | 5.86E-02 | 3.56E-01 |
| palmitoyl-oleoyl-glycerol (16:0/18:1) [2]*                      | 5.23E-03  | 6.25E-02 | 9.33E-01 | -5.39E-02 | 6.05E-02 | 3.73E-01 | -5.01E-02 | 5.87E-02 | 3.94E-01 |
| oleoyl-oleoyl-glycerol (18:1/18:1) [1]*                         | 1.32E-01  | 6.40E-02 | 4.00E-02 | 1.02E-01  | 6.21E-02 | 1.03E-01 | 7.69E-02  | 6.04E-02 | 2.04E-01 |
| oleoyl-oleoyl-glycerol (18:1/18:1) [2]*                         | 1.55E-01  | 6.40E-02 | 1.64E-02 | 9.26E-02  | 6.23E-02 | 1.39E-01 | 8.35E-02  | 6.06E-02 | 1.70E-01 |
| linoleoyl-arachidonoyl-glycerol (18:2/20:4) [1]*                | 1.02E-02  | 6.08E-02 | 8.67E-01 | -1.40E-02 | 5.89E-02 | 8.12E-01 | 2.24E-02  | 5.72E-02 | 6.95E-01 |
| linoleoyl-arachidonoyl-glycerol (18:2/20:4) [2]*                | -4.94E-02 | 6.41E-02 | 4.41E-01 | -9.00E-02 | 6.19E-02 | 1.47E-01 | -1.46E-02 | 6.03E-02 | 8.08E-01 |
| palmitoyl-arachidonoyl-glycerol (16:0/20:4) [1]*                | -6.49E-02 | 6.08E-02 | 2.87E-01 | -1.20E-01 | 5.86E-02 | 4.07E-02 | -1.38E-01 | 5.67E-02 | 1.56E-02 |
| palmitoyl-arachidonoyl-glycerol (16:0/20:4) [2]*                | -7.07E-02 | 5.99E-02 | 2.39E-01 | -1.43E-01 | 5.75E-02 | 1.34E-02 | -6.24E-02 | 5.63E-02 | 2.69E-01 |
| linoleoyl-linolenoyl-glycerol (18:2/18:3) [1]*                  | 7.93E-02  | 6.49E-02 | 2.23E-01 | 9.96E-02  | 6.27E-02 | 1.13E-01 | 4.21E-02  | 6.12E-02 | 4.91E-01 |
| linoleoyl-linolenoyl-glycerol (18:2/18:3) [2]*                  | 9.76E-02  | 6.27E-02 | 1.21E-01 | 8.64E-02  | 6.08E-02 | 1.56E-01 | 1.14E-01  | 5.89E-02 | 5.44E-02 |
| linoleoyl-docosahexaenoyl-glycerol (18:2/22:6) [2]*             | 1.36E-01  | 6.56E-02 | 3.98E-02 | -5.04E-03 | 6.40E-02 | 9.37E-01 | 8.78E-02  | 6.20E-02 | 1.58E-01 |
| palmitoleoyl-linoleoyl-glycerol (16:1/18:2) [1]*                | -6.24E-02 | 6.39E-02 | 3.30E-01 | -9.49E-02 | 6.17E-02 | 1.25E-01 | -6.10E-02 | 6.01E-02 | 3.11E-01 |
| diacylglycerol (14:0/18:1, 16:0/16:1) [1]*                      | -2.04E-02 | 6.37E-02 | 7.49E-01 | -5.70E-02 | 6.16E-02 | 3.55E-01 | -7.01E-02 | 5.98E-02 | 2.42E-01 |
| diacylglycerol (14:0/18:1, 16:0/16:1) [2]*                      | 5.86E-02  | 6.24E-02 | 3.49E-01 | -8.55E-03 | 6.05E-02 | 8.88E-01 | -8.10E-03 | 5.87E-02 | 8.90E-01 |
| oleoyl-arachidonoyl-glycerol (18:1/20:4) [1]*                   | 5.12E-02  | 6.39E-02 | 4.24E-01 | -2.11E-02 | 6.19E-02 | 7.33E-01 | 1.93E-02  | 6.02E-02 | 7.49E-01 |
| oleoyl-arachidonoyl-glycerol (18:1/20:4) [2]*                   | 2.70E-02  | 6.35E-02 | 6.71E-01 | -2.43E-02 | 6.15E-02 | 6.93E-01 | -3.52E-03 | 5.97E-02 | 9.53E-01 |
| palmitoyl-linolenoyl-glycerol (16:0/18:3) [2]*                  | 5.37E-02  | 6.51E-02 | 4.10E-01 | 2.49E-02  | 6.31E-02 | 6.93E-01 | -2.32E-02 | 6.13E-02 | 7.05E-01 |
| diacylglycerol (16:1/18:2 [2], 16:0/18:3 [1])*                  | 6.15E-02  | 6.52E-02 | 3.46E-01 | 2.60E-02  | 6.31E-02 | 6.81E-01 | 2.85E-02  | 6.13E-02 | 6.42E-01 |
| linoleoyl-linoleoyl-glycerol (18:2/18:2) [1]*                   | 2.77E-02  | 6.41E-02 | 6.66E-01 | 7.25E-02  | 6.19E-02 | 2.43E-01 | 6.36E-03  | 6.03E-02 | 9.16E-01 |
| linoleoyl-linoleoyl-glycerol (18:2/18:2) [2]*                   | 1.34E-01  | 6.54E-02 | 4.18E-02 | 1.04E-01  | 6.35E-02 | 1.03E-01 | 8.57E-02  | 6.18E-02 | 1.66E-01 |
| stearoyl-arachidonoyl-glycerol (18:0/20:4) [1]*                 | 1.02E-01  | 6.59E-02 | 1.22E-01 | 2.77E-03  | 6.40E-02 | 9.66E-01 | 1.08E-01  | 6.19E-02 | 8.26E-02 |
| stearoyl-arachidonoyl-glycerol (18:0/20:4) [2]*                 | -3.08E-02 | 6.18E-02 | 6.18E-01 | -1.11E-01 | 5.94E-02 | 6.32E-02 | 5.02E-02  | 5.80E-02 | 3.88E-01 |
| perfluorooctanesulfonate (PFOS)                                 | 5.34E-02  | 5.82E-02 | 3.60E-01 | 1.06E-02  | 6.05E-02 | 8.52E-01 | 2.00E-02  | 5.48E-02 | 7.15E-01 |
| 1-palmitoyl-GPE (O-16:0)*                                       | 5.08E-02  | 6.31E-02 | 4.21E-01 | -3.98E-02 | 6.11E-02 | 5.16E-01 | 4.71E-02  | 5.93E-02 | 4.28E-01 |
| 1-palmitoyl-2-stearoyl-GPC (O-16:0/18:0)*                       | -1.11E-01 | 6.54E-02 | 8.97E-02 | -3.60E-02 | 6.36E-02 | 5.72E-01 | -1.10E-01 | 6.15E-02 | 7.54E-02 |
| 1-palmitoyl-2-palmitoyl-GPC (O-16:0/16:0)*                      | -2.59E-01 | 6.34E-02 | 5.79E-05 | -2.16E-01 | 6.19E-02 | 5.48E-04 | -2.21E-01 | 5.99E-02 | 2.68E-04 |
| 1-stearoyl-2-docosapentaenoyl-GPC (O-18:0/22:5n3)*              | -1.27E-01 | 6.06E-02 | 3.65E-02 | -4.75E-02 | 5.91E-02 | 4.22E-01 | -9.54E-02 | 5.72E-02 | 9.64E-02 |
| 1-stearoyl-2-linoleoyl-GPC (O-18:0/18:2)*                       | -1.08E-01 | 6.19E-02 | 8.25E-02 | -4.65E-02 | 6.01E-02 | 4.40E-01 | -4.23E-02 | 5.84E-02 | 4.69E-01 |
| 1-stearoyl-2-docosapentaenoyl-GPE (18:0/22:5n3)*                | 5.64E-02  | 6.52E-02 | 3.88E-01 | 6.10E-02  | 6.31E-02 | 3.35E-01 | 8.63E-02  | 6.12E-02 | 1.60E-01 |
| 1-stearoyl-2-docosapentaenoyl-GPE (18:0/22:5n6)*                | -1.07E-01 | 6.41E-02 | 9.68E-02 | -1.40E-01 | 6.18E-02 | 2.41E-02 | -1.21E-01 | 6.01E-02 | 4.57E-02 |
| 1-stearoyl-2-adrenoyl-GPE (18:0/22:4)*                          | -6.02E-02 | 6.17E-02 | 3.30E-01 | -9.19E-02 | 5.96E-02 | 1.24E-01 | -6.50E-02 | 5.80E-02 | 2.64E-01 |
| 1-(1-enyl-stearoyl)-2-docosapentaenoyl-GPE (P-18:0/22:5n3)*     | -1.51E-01 | 6.03E-02 | 1.28E-02 | -1.68E-01 | 5.81E-02 | 4.07E-03 | -6.33E-02 | 5.72E-02 | 2.70E-01 |
| N-palmitoyl-sphingadienine (d18:2/16:0)*                        | 4.62E-02  | 6.38E-02 | 4.69E-01 | 1.72E-02  | 6.18E-02 | 7.81E-01 | 8.34E-02  | 5.98E-02 | 1.64E-01 |
| lactosyl-N-nervonoyl-sphingosine (d18:1/24:1)*                  | 4.04E-02  | 5.95E-02 | 4.98E-01 | 2.15E-02  | 5.76E-02 | 7.09E-01 | 7.33E-02  | 5.58E-02 | 1.91E-01 |
| glycosyl-N-behenoyl-sphingosine (d18:1/22:0)*                   | -2.02E-03 | 6.41E-02 | 9.75E-01 | 3.14E-02  | 6.20E-02 | 6.13E-01 | 3.56E-02  | 6.02E-02 | 5.55E-01 |
| lactosyl-N-behenoyl-sphingosine (d18:1/22:0)*                   | -8.36E-03 | 6.12E-02 | 8.92E-01 | 1.04E-01  | 5.89E-02 | 8.00E-02 | -3.45E-02 | 5.75E-02 | 5.49E-01 |
| N-behenoyl-sphingadienine (d18:2/22:0)*                         | 4.55E-02  | 6.35E-02 | 4.74E-01 | 1.30E-01  | 6.10E-02 | 3.34E-02 | 3.29E-02  | 5.97E-02 | 5.82E-01 |
| glycosyl-N-behenoyl-sphingadienine (d18:2/22:0)*                | -4.33E-03 | 6.28E-02 | 9.45E-01 | -1.91E-02 | 6.08E-02 | 7.54E-01 | 7.95E-02  | 5.89E-02 | 1.78E-01 |
| N-stearoyl-sphingadienine (d18:2/18:0)*                         | -1.30E-01 | 5.94E-02 | 2.90E-02 | -1.29E-01 | 5.75E-02 | 2.61E-02 | -9.33E-02 | 5.61E-02 | 9.73E-02 |
| N-palmitoylserine                                               | 6.47E-02  | 6.46E-02 | 3.18E-01 | -8.87E-03 | 6.27E-02 | 8.88E-01 | -1.40E-02 | 6.09E-02 | 8.19E-01 |
| N-oleoylserine                                                  | 3.81E-02  | 6.73E-02 | 5.72E-01 | 3.97E-02  | 6.51E-02 | 5.43E-01 | 8.54E-02  | 6.31E-02 | 1.77E-01 |
| sphingadienine                                                  | -9.39E-02 | 6.50E-02 | 1.50E-01 | -6.81E-02 | 6.30E-02 | 2.81E-01 | -6.68E-02 | 6.12E-02 | 2.76E-01 |
| palmitoleoyl-arachidonoyl-glycerol (16:1/20:4) [2]*             | 5.21E-02  | 6.40E-02 | 4.17E-01 | 2.74E-02  | 6.20E-02 | 6.58E-01 | 3.77E-02  | 6.02E-02 | 5.31E-01 |
| myristoyl-linoleoyl-glycerol (14:0/18:2) [2]*                   | 1.07E-01  | 6.19E-02 | 8.49E-02 | 1.00E-01  | 5.99E-02 | 9.54E-02 | 3.20E-02  | 5.84E-02 | 5.84E-01 |
| phosphatidylethanolamine (P-18:1/20:4, P-16:0/22:5n3)*          | -2.39E-02 | 6.37E-02 | 7.07E-01 | -1.23E-01 | 6.12E-02 | 4.49E-02 | 5.26E-02  | 5.98E-02 | 3.80E-01 |
| 1-stearoyl-2-(hydroxylinoyleoyl)-GPC (18:0/18:2(OH))*           | -1.20E-01 | 6.43E-02 | 6.19E-02 | -1.34E-01 | 6.21E-02 | 3.12E-02 | -4.62E-02 | 6.07E-02 | 4.47E-01 |
| 1-palmitoyl-2-(hydroxylinoyleoyl)-GPC (16:0/18:2(OH))*          | -1.62E-01 | 6.23E-02 | 9.84E-03 | -1.75E-01 | 6.01E-02 | 3.87E-03 | -4.87E-02 | 5.92E-02 | 4.12E-01 |
| hexadecaphosphingosine (d16:1)*                                 | -3.39E-02 | 6.38E-02 | 5.95E-01 | -4.70E-02 | 6.17E-02 | 4.47E-01 | -8.60E-02 | 5.97E-02 | 1.51E-01 |
| ceramide (d16:1/24:1, d18:2/22:1)*                              | 6.02E-03  | 6.24E-02 | 9.23E-01 | -4.86E-02 | 6.03E-02 | 4.21E-01 | -9.98E-02 | 5.84E-02 | 8.85E-02 |
| N-palmitoyl-heptadecaphosphingosine (d17:1/16:0)*               | -9.29E-02 | 6.28E-02 | 1.40E-01 | -9.15E-02 | 6.08E-02 | 1.33E-01 | -1.62E-01 | 5.85E-02 | 6.01E-03 |
| ceramide (d18:1/14:0, d16:1/16:0)*                              | 8.63E-02  | 6.41E-02 | 1.79E-01 | 6.56E-02  | 6.21E-02 | 2.92E-01 | 7.24E-04  | 6.05E-02 | 9.90E-01 |
| ceramide (d18:1/17:0, d17:1/18:0)*                              | -1.43E-01 | 6.18E-02 | 2.11E-02 | -1.29E-01 | 5.99E-02 | 3.17E-02 | -1.66E-01 | 5.78E-02 | 4.33E-03 |
| ceramide (d18:2/24:1, d18:1/24:2)*                              | -2.77E-02 | 6.36E-02 | 6.63E-01 | -5.86E-02 | 6.15E-02 | 3.41E-01 | -3.62E-02 | 5.98E-02 | 5.45E-01 |
| glycosyl ceramide (d18:2/24:1, d18:1/24:2)*                     | -6.56E-02 | 6.12E-02 | 2.85E-01 | -1.12E-01 | 5.90E-02 | 5.96E-02 | 3.13E-02  | 5.76E-02 | 5.87E-01 |
| glycosyl-N-tricosanoyl-sphingadienine (d18:2/23:0)*             | -4.18E-02 | 6.13E-02 | 4.95E-01 | -7.21E-02 | 5.92E-02 | 2.24E-01 | 4.92E-02  | 5.76E-02 | 3.94E-01 |
| glycosyl ceramide (d18:1/23:1, d17:1/24:1)*                     | -1.49E-01 | 6.25E-02 | 1.77E-02 | -1.41E-01 | 6.05E-02 | 2.02E-02 | -1.83E-01 | 5.83E-02 | 1.89E-03 |
| glycosyl-N-(2-hydroxynervonoyl)-sphingosine (d18:1/24:1(2OH))*  | 3.68E-02  | 5.94E-02 | 5.35E-01 | -9.74E-02 | 5.72E-02 | 8.96E-02 | -9.32E-03 | 5.59E-02 | 8.68E-01 |
| ceramide (d18:1/20:0, d16:1/22:0, d20:1/18:0)*                  | 2.69E-02  | 6.33E-02 | 6.71E-01 | 6.51E-02  | 6.12E-02 | 2.88E-01 | -7.31E-02 | 5.94E-02 | 2.19E-01 |
| stearoylcholine*                                                | 1.49E-01  | 6.40E-02 | 2.03E-02 | 1.86E-01  | 6.16E-02 | 2.70E-03 | 1.63E-01  | 6.00E-02 | 7.17E-03 |
| linoleoylcholine*                                               | 1.59E-01  | 6.24E-02 | 1.13E-02 | 1.88E-01  | 6.01E-02 | 1.94E-03 | 1.74E-01  | 5.84E-02 | 3.20E-03 |
| 1-adrenoyl-GPE (22:4)*                                          | -1.37E-01 | 6.20E-02 | 2.83E-02 | -8.83E-02 | 6.03E-02 | 1.44E-01 | -1.43E-01 | 5.82E-02 | 1.43E-02 |
| 1-docosapentaenoyl-GPE (22:5n3)*                                | -1.22E-01 | 6.34E-02 | 5.62E-02 | -7.62E-02 | 6.16E-02 | 2.17E-01 | -4.98E-02 | 6.00E-02 | 4.07E-01 |
| trazadone                                                       | 1.09E-02  | 6.26E-02 | 8.62E-01 | -4.49E-02 | 6.05E-02 | 4.58E-01 | -6.72E-02 | 5.87E-02 | 2.53E-01 |
| nisinate (24:6n3)                                               | 1.19E-01  | 6.69E-02 | 7.52E-02 | 1.31E-03  | 6.51E-02 | 9.84E-01 | 1.38E-01  | 6.27E-02 | 2.81E-02 |
| sphingomyelin (d18:0/20:0, d16:0/22:0)*                         | -6.93E-02 | 6.47E-02 | 2.85E-01 | -2.06E-01 | 6.15E-02 | 9.08E-04 | -4.31E-02 | 6.09E-02 | 4.80E-01 |
| sphingomyelin (d18:1/19:0, d19:1/18:0)*                         | -1.32E-01 | 5.83E-02 | 2.40E-02 | -1.47E-01 | 5.63E-02 | 9.55E-03 | -1.33E-01 | 5.48E-02 | 1.61E-02 |
| sphingomyelin (d18:2/18:1)*                                     | -1.97E-01 | 5.74E-02 | 6.84E-04 | -1.46E-01 | 5.60E-02 | 9.87E-03 | -1.18E-01 | 5.46E-02 | 3.22E-02 |
| sphingomyelin (d18:2/24:2)*                                     | -1.48E-01 | 5.87E-02 | 1.23E-02 | -1.57E-01 | 5.67E-02 | 5.92E-03 | -1.07E-02 | 5.56E-02 | 1.48E-01 |
| sphingomyelin (d18:2/21:0, d16:2/23:0)*                         | -8.24E-02 | 5.26E-02 | 1.18E-01 | -7.37E-02 | 5.09E-02 | 1.49E-01 | -6.33E-02 | 4.95E-02 | 2.02E-01 |
| sphingomyelin (d18:2/23:1)*                                     | -1.62E-01 | 5.60E-02 | 4.12E-03 | -2.07E-01 | 5.36E-02 | 1.42E-04 | -1.55E-01 | 5.27E-02 | 3.55E-03 |
| sphingomyelin (d18:1/25:0, d19:0/24:1, d20:1/23:0, d19:1/24:0)* | -9.27E-02 | 6.28E-02 | 1.41E-01 | -1.08E-01 | 6.07E-02 | 7.73E-02 | -1.02E-01 | 5.89E-02 | 8.58E-02 |
| sphingomyelin (d17:2/16:0, d18:2/15:0)*                         | -5.37E-02 | 5.41E-02 | 3.21E-01 | -5.96E-02 | 5.23E-02 | 2.55E-01 | -3.79E-02 | 5.09E-02 | 4.57E-01 |
| heneicosapentaenoate (21:5n3)                                   | 1.20E-01  | 6.38E-02 | 6.03E-02 | -4.74E-02 | 6.21E-02 | 4.46E-01 | 1.63E-01  | 5.96E-02 | 6.77E-03 |
| linolenoylcarnitine (C18:3)*                                    | -7.19E-02 | 6.41E-02 | 2.63E-01 | -3.99E-02 | 6.22E-02 | 5.21E-01 | 4.69E-03  | 6.04E-02 | 9.38E-01 |
| behenoylcarnitine (C22)*                                        | 1.01E-01  | 6.73E-02 | 1.35E-01 | 6.93E-02  | 6.53E-02 | 2.89E-01 | 9.18E-02  | 6.33E-02 | 1.48E-01 |

Supplementary Table 4: Parameter estimates for metabolome-wide association studies for diet-metabolite associations for each of: HEI-15, DASH and AMED diet, controlling for BMI

|                                                           |           |          |          |           |          |          |           |          |          |
|-----------------------------------------------------------|-----------|----------|----------|-----------|----------|----------|-----------|----------|----------|
| arachidoylcarnitine (C20)*                                | 5.03E-02  | 6.27E-02 | 4.23E-01 | 9.13E-02  | 6.05E-02 | 1.33E-01 | 4.54E-02  | 5.90E-02 | 4.42E-01 |
| lignoceroylcarnitine (C24)*                               | 1.07E-01  | 6.67E-02 | 1.11E-01 | 9.68E-02  | 6.46E-02 | 1.35E-01 | 1.06E-01  | 6.27E-02 | 9.09E-02 |
| cerotoylcarnitine (C26)*                                  | 1.72E-01  | 6.41E-02 | 7.88E-03 | 1.50E-01  | 6.22E-02 | 1.65E-02 | 1.33E-01  | 6.05E-02 | 2.86E-02 |
| ximenoylcarnitine (C26:1)*                                | 1.48E-01  | 6.36E-02 | 2.05E-02 | 2.56E-02  | 6.21E-02 | 6.80E-01 | 1.36E-01  | 5.98E-02 | 2.35E-02 |
| arachidonoylcarnitine (C20:4)                             | 4.80E-02  | 6.08E-02 | 4.31E-01 | 3.86E-02  | 5.89E-02 | 5.13E-01 | 6.42E-02  | 5.71E-02 | 2.62E-01 |
| eicosenoylcarnitine (C20:1)*                              | 1.65E-02  | 5.94E-02 | 7.81E-01 | 7.44E-03  | 5.75E-02 | 8.97E-01 | 1.45E-02  | 5.59E-02 | 7.95E-01 |
| dihomo-linoleoylcarnitine (C20:2)*                        | -1.86E-02 | 6.19E-02 | 7.64E-01 | 6.99E-03  | 5.99E-02 | 9.07E-01 | 3.11E-02  | 5.82E-02 | 5.93E-01 |
| dihomo-linolenoylcarnitine (C20:3n3 or 6)*                | 6.95E-02  | 6.13E-02 | 2.58E-01 | 5.72E-02  | 5.94E-02 | 3.36E-01 | 3.58E-02  | 5.78E-02 | 5.36E-01 |
| erucoylcarnitine (C22:1)*                                 | -1.13E-03 | 5.82E-02 | 9.84E-01 | -1.03E-03 | 5.63E-02 | 9.85E-01 | -1.62E-02 | 5.47E-02 | 7.68E-01 |
| nervonoylcarnitine (C24:1)*                               | 1.80E-02  | 6.37E-02 | 7.77E-01 | -7.07E-02 | 6.15E-02 | 2.52E-01 | 4.18E-02  | 5.98E-02 | 4.85E-01 |
| adrenoylcarnitine (C22:4)*                                | 1.27E-03  | 6.01E-02 | 9.83E-01 | 5.99E-02  | 5.80E-02 | 3.03E-01 | 1.72E-02  | 5.65E-02 | 7.61E-01 |
| glycosyl ceramide (d18:1/20:0, d16:1/22:0)*               | -3.66E-02 | 6.06E-02 | 5.47E-01 | -5.63E-02 | 5.86E-02 | 3.38E-01 | 8.47E-03  | 5.70E-02 | 8.82E-01 |
| 1-lignoceroyl-2-arachidonoyl-GPC (24:0/20:4)*             | 2.34E-01  | 6.32E-02 | 2.60E-04 | 1.63E-01  | 6.18E-02 | 8.76E-03 | 2.19E-01  | 5.94E-02 | 2.70E-04 |
| 1-nervonoyl-2-arachidonoyl-GPC (24:1/20:4)*               | 7.63E-02  | 6.41E-02 | 2.35E-01 | -8.98E-02 | 6.19E-02 | 1.48E-01 | 1.08E-01  | 6.00E-02 | 7.19E-02 |
| N-oxalyl glycine (NOG)                                    | 8.94E-02  | 6.23E-02 | 1.52E-01 | 1.12E-01  | 6.01E-02 | 6.46E-02 | 9.60E-02  | 5.85E-02 | 1.02E-01 |
| N,N,N-trimethyl-5-aminovalerate                           | 9.16E-03  | 6.25E-02 | 8.84E-01 | 5.77E-02  | 6.04E-02 | 3.40E-01 | -3.66E-02 | 5.87E-02 | 5.34E-01 |
| ethyl alpha-glucopyranoside                               | -2.67E-02 | 6.17E-02 | 6.66E-01 | -3.07E-01 | 5.68E-02 | 1.34E-07 | -2.30E-02 | 5.80E-02 | 6.92E-01 |
| carotene diol (1)                                         | 2.37E-01  | 5.83E-02 | 6.10E-05 | 1.28E-01  | 5.76E-02 | 2.73E-02 | 2.33E-01  | 5.47E-02 | 2.88E-05 |
| carotene diol (2)                                         | 2.31E-01  | 5.72E-02 | 6.69E-05 | 1.49E-01  | 5.62E-02 | 8.43E-03 | 2.04E-01  | 5.39E-02 | 1.91E-04 |
| carotene diol (3)                                         | 1.25E-01  | 6.44E-02 | 5.25E-02 | 7.82E-02  | 6.26E-02 | 2.13E-01 | 1.27E-01  | 6.05E-02 | 3.66E-02 |
| cortolone glucuronide (1)                                 | -1.23E-01 | 5.91E-02 | 3.86E-02 | -8.30E-02 | 5.74E-02 | 1.49E-01 | -6.93E-02 | 5.58E-02 | 2.15E-01 |
| fluconazole                                               | 2.25E-02  | 5.41E-02 | 6.78E-01 | -1.58E-03 | 5.24E-02 | 9.76E-01 | -3.71E-03 | 5.09E-02 | 9.42E-01 |
| Fibrinopeptide B                                          | 8.34E-02  | 6.73E-02 | 2.17E-01 | 6.31E-02  | 6.52E-02 | 3.34E-01 | 6.00E-02  | 6.34E-02 | 3.45E-01 |
| 1-oleyl-2-linoleoyl-GPC (O-18:1/18:2)*                    | 1.24E-02  | 6.37E-02 | 8.45E-01 | 3.48E-02  | 6.16E-02 | 5.72E-01 | 5.72E-02  | 5.98E-02 | 3.40E-01 |
| 1-palmityl-2-dihomo-linolenoyl-GPC (O-16:0/20:3)*         | -3.83E-02 | 6.63E-02 | 5.64E-01 | -1.26E-01 | 6.38E-02 | 5.00E-02 | -6.39E-02 | 6.23E-02 | 3.06E-01 |
| phosphatidylcholine (O-18:1/20:4, O-16:0/22:5n3)*         | -3.09E-02 | 6.30E-02 | 6.24E-01 | -8.66E-02 | 6.08E-02 | 1.55E-01 | 2.71E-02  | 5.92E-02 | 6.47E-01 |
| 1-palmitoyl-2-pentadecanoyl-GPC (16:0/15:0)*              | -8.56E-02 | 6.04E-02 | 1.58E-01 | -9.34E-03 | 5.87E-02 | 8.74E-01 | -1.31E-01 | 5.65E-02 | 2.14E-02 |
| (N(1) + N(8))-acetylspermidine                            | 2.04E-02  | 6.17E-02 | 7.42E-01 | 3.95E-02  | 5.97E-02 | 5.09E-01 | 4.92E-02  | 5.80E-02 | 3.97E-01 |
| THC carboxylic acid                                       | 3.27E-02  | 6.02E-02 | 5.88E-01 | -5.97E-02 | 5.82E-02 | 3.06E-01 | 3.75E-02  | 5.65E-02 | 5.08E-01 |
| THC carboxylic acid glucuronide                           | 3.45E-02  | 5.94E-02 | 5.63E-01 | -5.11E-02 | 5.75E-02 | 3.75E-01 | 3.37E-02  | 5.59E-02 | 5.47E-01 |
| 5-dodecenoylcarnitine (C12:1)                             | -2.26E-01 | 6.18E-02 | 3.01E-04 | -2.51E-01 | 5.93E-02 | 3.17E-05 | -1.38E-01 | 5.89E-02 | 1.98E-02 |
| 2-butenoylglycine                                         | -3.37E-02 | 5.99E-02 | 5.75E-01 | 3.26E-02  | 5.80E-02 | 5.74E-01 | 4.73E-02  | 5.63E-02 | 4.02E-01 |
| hydroxy-CMPF*                                             | 1.48E-01  | 6.18E-02 | 1.74E-02 | 7.30E-02  | 6.02E-02 | 2.27E-01 | 2.04E-01  | 5.74E-02 | 4.36E-04 |
| 3-hydroxyoleoylcarnitine                                  | -4.22E-02 | 6.04E-02 | 4.85E-01 | -5.20E-02 | 5.85E-02 | 3.75E-01 | -4.75E-02 | 5.68E-02 | 4.04E-01 |
| 3-hydroxyphenylacetoylglutamine                           | 1.73E-01  | 6.15E-02 | 5.31E-03 | 1.63E-01  | 5.95E-02 | 6.43E-03 | 1.41E-01  | 5.80E-02 | 1.57E-02 |
| trans-2-hexenoylglycine                                   | -1.35E-01 | 5.77E-02 | 1.97E-02 | -5.67E-02 | 5.63E-02 | 3.15E-01 | -5.79E-02 | 5.47E-02 | 2.91E-01 |
| 2-hydroxyarachidate*                                      | -9.99E-02 | 6.32E-02 | 1.15E-01 | -1.35E-01 | 6.09E-02 | 2.69E-02 | -1.16E-01 | 5.93E-02 | 5.24E-02 |
| N-stearoylserine*                                         | -8.43E-02 | 6.48E-02 | 1.94E-01 | -8.98E-02 | 6.27E-02 | 1.54E-01 | 5.19E-03  | 6.11E-02 | 9.32E-01 |
| lyxonate                                                  | 1.23E-01  | 6.09E-02 | 4.39E-02 | 1.15E-02  | 5.94E-02 | 8.47E-01 | 4.52E-02  | 5.77E-02 | 4.34E-01 |
| dodecenedioate (C12:1-DC)*                                | 5.86E-02  | 6.25E-02 | 3.49E-01 | 4.32E-02  | 6.05E-02 | 4.76E-01 | 2.28E-02  | 5.88E-02 | 6.98E-01 |
| hexadecenedioate (C16:1-DC)*                              | -1.33E-01 | 6.30E-02 | 3.50E-02 | -1.16E-01 | 6.11E-02 | 5.82E-02 | -1.26E-01 | 5.92E-02 | 3.41E-02 |
| octadecenedioate (C18:1-DC)                               | 7.55E-03  | 6.46E-02 | 9.07E-01 | 8.14E-02  | 6.23E-02 | 1.93E-01 | 1.25E-02  | 6.07E-02 | 8.37E-01 |
| heptenedioate (C7:1-DC)*                                  | -2.65E-01 | 6.03E-02 | 1.57E-05 | -8.10E-02 | 6.01E-02 | 1.79E-01 | -2.31E-01 | 5.69E-02 | 6.30E-05 |
| octadecadienedioate (C18:2-DC)*                           | 3.21E-02  | 6.72E-02 | 6.33E-01 | 2.17E-02  | 6.51E-02 | 7.39E-01 | 3.63E-02  | 6.32E-02 | 5.66E-01 |
| glucuronide of C12H22O4 (1)*                              | 1.59E-01  | 6.52E-02 | 1.54E-02 | 2.29E-01  | 6.23E-02 | 2.82E-04 | 5.88E-02  | 6.18E-02 | 3.42E-01 |
| glucuronide of C10H18O2 (1)*                              | 2.67E-02  | 6.40E-02 | 6.76E-01 | 2.16E-02  | 6.19E-02 | 7.27E-01 | 6.31E-02  | 6.00E-02 | 2.94E-01 |
| 3-carboxy-4-methyl-5-pentyl-2-furanpropionate (3-CMPFP)** | -6.04E-02 | 6.01E-02 | 3.16E-01 | -1.04E-02 | 5.82E-02 | 8.58E-01 | 3.15E-03  | 5.66E-02 | 9.56E-01 |
| methylnaphthyl sulfate (1)*                               | 2.11E-02  | 4.94E-02 | 6.70E-01 | -3.07E-02 | 4.78E-02 | 5.21E-01 | -7.83E-02 | 4.62E-02 | 9.14E-02 |
| methylnaphthyl sulfate (2)*                               | -4.17E-02 | 5.17E-02 | 4.21E-01 | -8.96E-02 | 4.98E-02 | 7.30E-02 | 3.99E-03  | 4.87E-02 | 9.35E-01 |
| glucuronide of C10H18O2 (7)*                              | 2.08E-02  | 6.44E-02 | 7.47E-01 | -1.04E-03 | 6.23E-02 | 9.87E-01 | 3.17E-02  | 6.05E-02 | 6.00E-01 |
| glucuronide of C10H18O2 (8)*                              | 5.66E-02  | 6.57E-02 | 3.90E-01 | -1.54E-02 | 6.37E-02 | 8.09E-01 | 4.75E-02  | 6.18E-02 | 4.43E-01 |
| N-acetyl-2-aminooctanoate*                                | 1.49E-02  | 6.31E-02 | 8.13E-01 | 5.96E-02  | 6.10E-02 | 3.29E-01 | 3.14E-02  | 5.93E-02 | 5.96E-01 |
| hydroxyasparagine**                                       | -2.38E-02 | 5.42E-02 | 6.61E-01 | 4.28E-02  | 5.25E-02 | 4.16E-01 | -7.08E-02 | 5.08E-02 | 1.65E-01 |
| perfluorooctanoate (PFOA)                                 | -1.90E-02 | 5.74E-02 | 7.41E-01 | -7.01E-02 | 5.54E-02 | 2.07E-01 | -3.86E-03 | 5.40E-02 | 9.43E-01 |
| pyroglutamylphenylalanine                                 | 3.94E-02  | 6.43E-02 | 5.40E-01 | -1.27E-02 | 6.23E-02 | 8.38E-01 | 3.70E-02  | 6.05E-02 | 5.42E-01 |
| 3-hydroxybutyrylglycine**                                 | -1.15E-01 | 5.99E-02 | 5.53E-02 | -4.95E-02 | 5.83E-02 | 3.96E-01 | -7.59E-03 | 5.67E-02 | 8.94E-01 |
| carboxybuprofen glucuronide*                              | 6.14E-02  | 6.22E-02 | 3.25E-01 | -4.30E-02 | 6.03E-02 | 4.76E-01 | -7.59E-03 | 5.86E-02 | 8.97E-01 |
| glyco-beta-muricholate**                                  | 1.12E-01  | 6.57E-02 | 8.93E-02 | 1.23E-01  | 6.35E-02 | 5.37E-02 | 1.52E-02  | 6.21E-02 | 8.07E-01 |
| N-methylhydroxyproline**                                  | 1.75E-01  | 6.61E-02 | 8.77E-03 | 1.44E-01  | 6.42E-02 | 2.59E-02 | 1.02E-01  | 6.26E-02 | 1.05E-01 |
| N,N,N-trimethyl-alanylproline betaine (TMAP)              | -9.40E-03 | 5.97E-02 | 8.75E-01 | 1.34E-01  | 5.73E-02 | 2.01E-02 | -6.43E-02 | 5.60E-02 | 2.52E-01 |
| 3-formylindole                                            | 1.53E-01  | 5.84E-02 | 9.27E-03 | 1.60E-01  | 5.64E-02 | 4.86E-03 | 1.18E-01  | 5.52E-02 | 3.37E-02 |
| 1-(1-enyl-oleoyl)-2-docosahexaenoyl-GPC (P-18:1/22:6)*    | 1.74E-01  | 5.56E-02 | 1.94E-03 | 2.95E-02  | 5.47E-02 | 5.90E-01 | 2.34E-01  | 5.13E-02 | 7.84E-06 |
| pyroglutamylalanine*                                      | -1.97E-02 | 6.52E-02 | 7.63E-01 | 4.60E-02  | 6.31E-02 | 4.66E-01 | -7.83E-02 | 6.12E-02 | 2.01E-01 |
| pyroglutamylproline*                                      | -1.53E-01 | 6.61E-02 | 2.16E-02 | -1.18E-01 | 6.42E-02 | 6.64E-02 | -1.02E-01 | 6.24E-02 | 1.03E-01 |
| pyroglutamylleucine*                                      | 5.03E-03  | 6.40E-02 | 9.37E-01 | 5.51E-02  | 6.18E-02 | 3.74E-01 | -9.03E-02 | 5.99E-02 | 1.33E-01 |
| pyroglutamylisoleucine*                                   | 2.23E-02  | 6.59E-02 | 7.36E-01 | 2.11E-02  | 6.38E-02 | 7.41E-01 | -4.64E-02 | 6.19E-02 | 4.54E-01 |
| gamma-glutamylcitrulline*                                 | -1.19E-01 | 6.37E-02 | 6.25E-02 | -7.83E-02 | 6.19E-02 | 2.07E-01 | -7.81E-02 | 6.01E-02 | 1.95E-01 |
| resveratrol disulfate (1)*                                | 2.31E-02  | 6.55E-02 | 7.25E-01 | -9.68E-02 | 6.31E-02 | 1.27E-01 | 2.08E-02  | 6.16E-02 | 7.36E-01 |
| resveratrol disulfate (2)*                                | 5.04E-03  | 6.58E-02 | 9.39E-01 | -1.68E-01 | 6.29E-02 | 8.12E-03 | 1.90E-03  | 6.18E-02 | 9.76E-01 |
| glycine conjugate of C10H12O2*                            | -1.04E-01 | 6.50E-02 | 1.11E-01 | -1.36E-01 | 6.26E-02 | 3.09E-02 | -1.25E-01 | 6.09E-02 | 4.07E-02 |
| glycine conjugate of C10H14O2 (1)*                        | -2.63E-01 | 6.36E-02 | 4.59E-05 | -2.47E-01 | 6.16E-02 | 8.06E-05 | -2.17E-01 | 6.02E-02 | 3.73E-04 |
| glutamine conjugate of C7H12O2*                           | -1.87E-01 | 6.13E-02 | 2.50E-03 | -8.39E-02 | 6.01E-02 | 1.64E-01 | -1.36E-01 | 5.80E-02 | 1.99E-02 |
| glutamine conjugate of C6H10O2 (1)*                       | -1.01E-01 | 6.24E-02 | 1.07E-01 | -2.72E-02 | 6.07E-02 | 6.54E-01 | -5.40E-02 | 5.89E-02 | 3.60E-01 |
| glutamine conjugate of C6H10O2 (2)*                       | -1.26E-01 | 6.05E-02 | 3.87E-02 | -7.80E-02 | 5.88E-02 | 1.86E-01 | -7.37E-02 | 5.71E-02 | 1.98E-01 |
| dihydroferulic acid sulfate                               | 1.10E-01  | 6.64E-02 | 9.99E-02 | 1.55E-01  | 6.39E-02 | 1.61E-02 | 4.46E-02  | 6.27E-02 | 4.77E-01 |
| sphingomyelin (d17:1/14:0, d16:1/15:0)*                   | -2.10E-02 | 5.61E-02 | 7.09E-01 | -7.18E-03 | 5.43E-02 | 8.95E-01 | -4.26E-02 | 5.27E-02 | 4.19E-01 |
| tetradecadienoate (14:2)*                                 | -1.42E-01 | 6.34E-02 | 2.58E-02 | -1.63E-01 | 6.11E-02 | 8.21E-03 | -8.33E-02 | 5.99E-02 | 1.66E-01 |
| 8-methoxykynurenate                                       | -2.49E-02 | 6.44E-02 | 4.57E-01 | -6.96E-02 | 6.23E-02 | 2.64E-01 | -6.88E-02 | 6.05E-02 | 2.56E-01 |
| 3-amino-2-piperidone                                      | 4.69E-02  | 5.94E-02 | 4.30E-01 | 1.24E-01  | 5.71E-02 | 3.05E-02 | 5.99E-02  | 5.58E-02 | 2.84E-01 |
| N,N-dimethylalanine                                       | 1.26E-02  | 6.21E-02 | 8.40E-01 | -3.02E-03 | 6.01E-02 | 9.60E-01 | 4.98E-02  | 5.83E-02 | 3.94E-01 |
| 3-indoleglyoxylic acid                                    | 1.58E-01  | 6.17E-02 | 1.08E-02 | 1.32E-01  | 5.99E-02 | 2.85E-02 | 8.36E-02  | 5.85E-02 | 1.54E-01 |
| ethyl beta-glucopyranoside                                | 1.08E-01  | 6.13E-02 | 8.00E-02 | -3.52E-02 | 5.97E-02 | 5.55E-01 | 8.27E-02  | 5.78E-02 | 1.54E-01 |

Supplementary Table 4: Parameter estimates for metabolome-wide association studies for diet-metabolite associations for each of: HEI-15, DASH and AMED diet, controlling for BMI

|                                                        |           |          |          |           |          |          |           |          |          |
|--------------------------------------------------------|-----------|----------|----------|-----------|----------|----------|-----------|----------|----------|
| 2-hydroxysebacate                                      | 1.52E-01  | 6.39E-02 | 1.78E-02 | 1.76E-01  | 6.16E-02 | 4.62E-03 | 9.80E-02  | 6.04E-02 | 1.06E-01 |
| enterolactone sulfate                                  | 1.19E-01  | 6.22E-02 | 5.77E-02 | 4.51E-02  | 6.06E-02 | 4.57E-01 | 7.92E-02  | 5.87E-02 | 1.78E-01 |
| ascorbic acid 3-sulfate*                               | 1.85E-01  | 6.39E-02 | 4.18E-03 | 2.30E-01  | 6.12E-02 | 2.12E-04 | 8.33E-02  | 6.08E-02 | 1.71E-01 |
| 3-hydroxyhippurate sulfate                             | 1.14E-01  | 6.47E-02 | 7.79E-02 | 1.31E-01  | 6.24E-02 | 3.75E-02 | 1.27E-01  | 6.07E-02 | 3.66E-02 |
| 6-bromotryptophan                                      | 2.24E-02  | 6.44E-02 | 7.28E-01 | 8.43E-03  | 6.23E-02 | 8.93E-01 | -5.14E-02 | 6.05E-02 | 3.96E-01 |
| delta-CEHC                                             | -2.31E-01 | 6.41E-02 | 3.76E-04 | -8.04E-02 | 6.33E-02 | 2.05E-01 | -1.45E-01 | 6.11E-02 | 1.84E-02 |
| N6,N6-dimethyllysine                                   | -5.14E-02 | 5.87E-02 | 3.83E-01 | -3.01E-02 | 5.69E-02 | 5.97E-01 | 2.45E-03  | 5.53E-02 | 9.65E-01 |
| 1-carboxyethylphenylalanine                            | 6.29E-03  | 5.32E-02 | 9.06E-01 | 9.57E-02  | 5.12E-02 | 6.26E-02 | -7.67E-03 | 5.00E-02 | 8.78E-01 |
| 1-carboxyethyltyrosine                                 | 1.38E-02  | 5.37E-02 | 7.97E-01 | 7.90E-02  | 5.18E-02 | 1.28E-01 | 1.12E-02  | 5.05E-02 | 8.24E-01 |
| 1-carboxyethylvaline                                   | 3.31E-02  | 5.54E-02 | 5.51E-01 | 1.26E-01  | 5.31E-02 | 1.82E-02 | 3.32E-02  | 5.20E-02 | 5.24E-01 |
| 1-carboxyethylleucine                                  | 1.80E-04  | 5.50E-02 | 9.97E-01 | 9.66E-03  | 5.32E-02 | 8.56E-01 | -1.13E-02 | 5.17E-02 | 8.28E-01 |
| 1-carboxyethylisoleucine                               | 1.22E-03  | 5.52E-02 | 9.82E-01 | 8.79E-02  | 5.32E-02 | 9.96E-02 | 3.67E-03  | 5.19E-02 | 9.44E-01 |
| dodecadienoate (12:2)*                                 | -5.17E-02 | 6.28E-02 | 4.11E-01 | -7.21E-02 | 6.07E-02 | 2.36E-01 | -3.43E-02 | 5.91E-02 | 5.62E-01 |
| indoleacetoylcarnitine*                                | -7.84E-02 | 6.14E-02 | 2.03E-01 | -1.86E-01 | 5.85E-02 | 1.66E-03 | 4.11E-02  | 5.78E-02 | 4.78E-01 |
| gamma-CEHC sulfate                                     | -3.37E-02 | 6.20E-02 | 5.87E-01 | 6.67E-02  | 5.99E-02 | 2.66E-01 | -6.89E-02 | 5.81E-02 | 2.37E-01 |
| delta-CEHC glucuronide                                 | -1.56E-01 | 6.41E-02 | 1.54E-02 | -3.67E-03 | 6.27E-02 | 9.53E-01 | -9.73E-02 | 6.06E-02 | 1.10E-01 |
| N-acetyl-isoptreanine                                  | 6.51E-02  | 6.35E-02 | 3.06E-01 | 2.46E-02  | 6.16E-02 | 6.90E-01 | 8.10E-02  | 5.96E-02 | 1.75E-01 |
| glucuronide of piperine metabolite C17H21NO3 (3)*      | 7.85E-02  | 6.57E-02 | 2.33E-01 | -8.65E-02 | 6.36E-02 | 1.75E-01 | 9.09E-02  | 6.17E-02 | 1.42E-01 |
| glucuronide of piperine metabolite C17H21NO3 (4)*      | 5.96E-02  | 6.40E-02 | 3.53E-01 | -9.73E-02 | 6.18E-02 | 1.16E-01 | 9.68E-02  | 6.00E-02 | 1.08E-01 |
| glucuronide of piperine metabolite C17H21NO3 (5)*      | 6.69E-02  | 6.48E-02 | 3.03E-01 | -1.14E-01 | 6.25E-02 | 6.89E-02 | 9.34E-02  | 6.08E-02 | 1.26E-01 |
| sulfate of piperine metabolite C16H19NO3 (2)*          | 5.99E-02  | 6.40E-02 | 3.50E-01 | -1.28E-01 | 6.16E-02 | 3.87E-02 | 8.85E-02  | 6.01E-02 | 1.42E-01 |
| sulfate of piperine metabolite C16H19NO3 (3)*          | 5.82E-02  | 6.33E-02 | 3.59E-01 | -1.15E-01 | 6.10E-02 | 5.95E-02 | 8.53E-02  | 5.94E-02 | 1.52E-01 |
| sulfate of piperine metabolite C18H21NO3 (1)*          | 1.02E-02  | 6.20E-02 | 8.69E-01 | -1.21E-01 | 5.96E-02 | 4.36E-02 | 4.53E-02  | 5.82E-02 | 4.37E-01 |
| 5-hydroxyindole glucuronide                            | 3.14E-02  | 6.72E-02 | 6.40E-01 | 3.90E-02  | 6.50E-02 | 5.49E-01 | 3.07E-02  | 6.32E-02 | 6.28E-01 |
| N-acetylhomocitrulline                                 | -3.19E-03 | 6.20E-02 | 9.59E-01 | -3.28E-02 | 5.99E-02 | 5.84E-01 | -5.24E-02 | 5.82E-02 | 3.69E-01 |
| 2-naphthol sulfate                                     | -5.06E-02 | 5.78E-02 | 3.82E-01 | -8.30E-02 | 5.58E-02 | 1.38E-01 | -6.18E-02 | 5.43E-02 | 2.56E-01 |
| (2,4 or 2,5)-dimethylphenol sulfate                    | -7.19E-02 | 5.58E-02 | 1.99E-01 | -1.62E-01 | 5.33E-02 | 2.56E-03 | -4.49E-03 | 5.27E-02 | 9.32E-01 |
| 4-ethylcatechol sulfate                                | 9.09E-02  | 6.17E-02 | 1.42E-01 | 1.15E-01  | 5.96E-02 | 5.37E-02 | 3.66E-02  | 5.82E-02 | 5.31E-01 |
| 11beta-hydroxyandrosterone glucuronide                 | -2.94E-02 | 6.46E-02 | 6.50E-01 | 4.58E-02  | 6.25E-02 | 4.64E-01 | -7.60E-02 | 6.06E-02 | 2.11E-01 |
| 11beta-hydroxyetiocholanolone glucuronide*             | 4.24E-02  | 6.33E-02 | 5.03E-01 | 1.81E-02  | 6.13E-02 | 7.68E-01 | -6.07E-02 | 5.94E-02 | 3.08E-01 |
| N2-acetyl,N6-methyllysine                              | -9.33E-02 | 6.60E-02 | 1.59E-01 | -1.13E-01 | 6.38E-02 | 7.63E-02 | -8.79E-03 | 6.23E-02 | 8.88E-01 |
| cholic acid glucuronide                                | 9.25E-02  | 6.61E-02 | 1.62E-01 | 7.43E-02  | 6.40E-02 | 2.47E-01 | 1.10E-01  | 6.20E-02 | 7.73E-02 |
| deoxycholic acid glucuronide                           | 2.28E-02  | 6.53E-02 | 7.27E-01 | -4.28E-02 | 6.32E-02 | 4.99E-01 | 9.58E-02  | 6.12E-02 | 1.18E-01 |
| 4-allylcatechol sulfate                                | 1.26E-01  | 6.68E-02 | 6.04E-02 | 1.19E-01  | 6.47E-02 | 6.62E-02 | 1.16E-01  | 6.29E-02 | 6.65E-02 |
| 2-hydroxyfluorene sulfate                              | -2.90E-02 | 5.27E-02 | 5.83E-01 | -9.07E-02 | 5.07E-02 | 7.51E-02 | -2.41E-03 | 4.96E-02 | 9.61E-01 |
| vanillate glucuronide                                  | 6.56E-02  | 6.70E-02 | 3.28E-01 | 1.12E-01  | 6.46E-02 | 8.35E-02 | 2.87E-03  | 6.31E-02 | 9.64E-01 |
| 4-methylhexanoylglutamine                              | -2.13E-01 | 6.23E-02 | 7.14E-04 | -1.92E-01 | 6.05E-02 | 1.66E-03 | -2.28E-01 | 5.82E-02 | 1.17E-04 |
| Benazeprilat                                           | 1.45E-01  | 7.04E-02 | 4.00E-02 | 6.76E-02  | 6.86E-02 | 3.25E-01 | -5.37E-02 | 6.66E-02 | 4.21E-01 |
| 1-nonadecenoyl-GPC (19:1)*                             | 9.15E-02  | 5.99E-02 | 1.28E-01 | 6.72E-02  | 5.81E-02 | 2.48E-01 | 3.05E-02  | 5.66E-02 | 5.91E-01 |
| desmethycitalopram*                                    | -1.45E-01 | 7.02E-02 | 4.02E-02 | -2.56E-02 | 6.84E-02 | 7.09E-01 | -2.16E-02 | 6.65E-02 | 7.46E-01 |
| citalopram propionate*                                 | -8.02E-02 | 6.82E-02 | 2.41E-01 | -1.79E-02 | 6.61E-02 | 7.86E-01 | -1.50E-03 | 6.43E-02 | 9.81E-01 |
| 4-hydroxy duloxetine glucuronide*                      | -7.03E-18 | 1.19E-17 | 5.54E-01 | -2.63E-17 | 1.14E-17 | 2.16E-02 | -7.49E-18 | 1.12E-17 | 5.02E-01 |
| 5-hydroxy-6-methoxy duloxetine sulfate*                | -2.33E-02 | 7.30E-02 | 7.49E-01 | -1.21E-02 | 7.07E-02 | 8.64E-01 | -1.80E-02 | 6.86E-02 | 7.94E-01 |
| N-desalkylquetiapine*                                  | 4.94E-02  | 7.07E-02 | 4.85E-01 | -3.66E-02 | 6.84E-02 | 5.93E-01 | -7.31E-02 | 6.64E-02 | 2.71E-01 |
| ranitidine N-oxide*                                    | -5.41E-02 | 7.12E-02 | 4.49E-01 | -5.13E-03 | 6.90E-02 | 9.41E-01 | 1.52E-02  | 6.70E-02 | 8.21E-01 |
| 7-hydroxywarfarin                                      | 6.07E-02  | 7.14E-02 | 3.96E-01 | 8.26E-02  | 6.90E-02 | 2.33E-01 | -1.13E-02 | 6.72E-02 | 8.66E-01 |
| glycoursodeoxycholic acid sulfate (1)                  | -1.56E-01 | 6.00E-02 | 9.80E-03 | -1.60E-01 | 5.80E-02 | 6.21E-03 | -1.33E-01 | 5.65E-02 | 1.95E-02 |
| dihydrocaffeate sulfate (2)                            | 2.22E-01  | 6.46E-02 | 6.71E-04 | 1.92E-01  | 6.28E-02 | 2.40E-03 | 1.86E-01  | 6.10E-02 | 2.56E-03 |
| lithocholate sulfate (1)                               | 6.76E-02  | 6.50E-02 | 2.99E-01 | 1.06E-01  | 6.27E-02 | 9.30E-02 | 1.15E-01  | 6.08E-02 | 5.96E-02 |
| 3-hydroxyhexanoylcarnitine (1)                         | -4.72E-02 | 6.52E-02 | 4.69E-01 | 3.51E-02  | 6.31E-02 | 5.79E-01 | -1.46E-02 | 6.13E-02 | 8.13E-01 |
| 3-(methylthio)acetaminophen sulfate*                   | 8.86E-02  | 6.47E-02 | 1.72E-01 | 1.32E-01  | 6.23E-02 | 3.52E-02 | 8.24E-02  | 6.08E-02 | 1.76E-01 |
| 2-ketocaprylate                                        | 1.51E-01  | 6.23E-02 | 1.59E-02 | 1.46E-01  | 6.03E-02 | 1.62E-02 | 7.14E-02  | 5.91E-02 | 2.28E-01 |
| 2,6-dihydroxybenzoic acid                              | 2.39E-01  | 6.09E-02 | 1.11E-04 | 3.14E-01  | 5.75E-02 | 1.05E-07 | 1.74E-01  | 5.79E-02 | 2.85E-03 |
| tetrahydrocortisol sulfate (1)                         | -1.09E-01 | 6.12E-02 | 7.52E-02 | -3.69E-02 | 5.95E-02 | 5.36E-01 | -1.40E-01 | 5.73E-02 | 1.51E-02 |
| 3-ethylcatechol sulfate (1)                            | -6.23E-02 | 6.17E-02 | 3.13E-01 | -1.64E-01 | 5.90E-02 | 5.73E-03 | -2.20E-02 | 5.81E-02 | 7.05E-01 |
| 3-ethylcatechol sulfate (2)                            | -1.19E-02 | 5.68E-02 | 8.34E-01 | -7.20E-03 | 5.49E-02 | 8.96E-01 | -1.89E-03 | 5.34E-02 | 9.72E-01 |
| 4-acetylcatechol sulfate (1)                           | 1.64E-01  | 6.13E-02 | 7.97E-03 | 1.93E-01  | 5.89E-02 | 1.18E-03 | 1.20E-01  | 5.79E-02 | 3.95E-02 |
| 1-(14 or 15-methyl)palmitoyl-GPC (a17:0 or i17:0)*     | -7.54E-02 | 6.18E-02 | 2.24E-01 | -2.31E-02 | 5.99E-02 | 7.00E-01 | -1.31E-01 | 5.77E-02 | 2.39E-02 |
| montelukast                                            | -5.58E-02 | 7.19E-02 | 4.38E-01 | 4.27E-02  | 6.96E-02 | 5.40E-01 | -9.59E-02 | 6.75E-02 | 1.56E-01 |
| 2,3-dihydroxy-5-methylthio-4-pentenoate (DMTPA)*       | -4.27E-02 | 5.45E-02 | 4.34E-01 | 7.74E-02  | 5.26E-02 | 1.42E-01 | -9.17E-02 | 5.10E-02 | 7.32E-02 |
| Fibrinopeptide A (3-16)**                              | 9.69E-02  | 6.73E-02 | 1.51E-01 | 8.98E-02  | 6.52E-02 | 1.70E-01 | 4.86E-02  | 6.35E-02 | 4.44E-01 |
| meloxicam                                              | -9.67E-02 | 7.21E-02 | 1.81E-01 | 2.11E-02  | 7.00E-02 | 7.63E-01 | -3.95E-02 | 6.79E-02 | 5.62E-01 |
| Fibrinopeptide B (1-13)**                              | 8.96E-02  | 6.76E-02 | 1.86E-01 | 9.94E-02  | 6.53E-02 | 1.29E-01 | 2.30E-02  | 6.37E-02 | 7.19E-01 |
| losartan                                               | -1.01E-01 | 6.40E-02 | 1.17E-01 | -4.32E-02 | 6.21E-02 | 4.88E-01 | -5.02E-02 | 6.03E-02 | 4.06E-01 |
| cyclobenzaprine                                        | -3.02E-02 | 5.73E-02 | 5.98E-01 | -5.89E-02 | 5.54E-02 | 2.88E-01 | -1.31E-03 | 5.39E-02 | 9.81E-01 |
| emtricitabine                                          | -1.12E-02 | 7.22E-02 | 8.76E-01 | -7.98E-02 | 6.97E-02 | 2.53E-01 | 2.93E-02  | 6.79E-02 | 6.66E-01 |
| darunavir                                              | -2.34E-02 | 7.24E-02 | 7.46E-01 | -8.12E-02 | 6.99E-02 | 2.47E-01 | 3.74E-03  | 6.81E-02 | 9.56E-01 |
| 5-hydroxy-2-methylpyridine sulfate                     | -3.21E-03 | 6.28E-02 | 9.59E-01 | -2.16E-02 | 6.08E-02 | 7.23E-01 | -9.23E-02 | 5.88E-02 | 1.18E-01 |
| 3-hydroxy-2-methylpyridine sulfate                     | 9.60E-02  | 6.17E-02 | 1.21E-01 | 3.62E-02  | 6.00E-02 | 5.47E-01 | 1.04E-01  | 5.79E-02 | 7.48E-02 |
| hydroxypalmitoyl sphingomyelin (d18:1/16:0(OH))**      | 1.98E-02  | 6.40E-02 | 7.57E-01 | 3.77E-02  | 6.19E-02 | 5.43E-01 | 1.73E-02  | 6.01E-02 | 7.74E-01 |
| tamoxifen                                              | -7.03E-18 | 1.19E-17 | 5.54E-01 | -2.63E-17 | 1.14E-17 | 2.16E-02 | -7.49E-18 | 1.12E-17 | 5.02E-01 |
| taurochenodeoxycholic acid 3-sulfate                   | -6.45E-02 | 6.34E-02 | 3.10E-01 | -6.98E-02 | 6.13E-02 | 2.56E-01 | -6.86E-02 | 5.96E-02 | 2.50E-01 |
| tetradecadienedioate (C14:2-DC)*                       | -5.22E-02 | 6.25E-02 | 4.05E-01 | -7.46E-02 | 6.04E-02 | 2.18E-01 | -8.22E-02 | 5.86E-02 | 1.62E-01 |
| pregnenetriol sulfate*                                 | -1.31E-01 | 5.85E-02 | 2.56E-02 | -1.10E-01 | 5.68E-02 | 5.26E-02 | -1.70E-01 | 5.46E-02 | 2.04E-03 |
| pregnenetriol disulfate*                               | -1.79E-01 | 5.90E-02 | 2.66E-03 | -1.67E-01 | 5.72E-02 | 3.85E-03 | -1.76E-01 | 5.54E-02 | 1.68E-03 |
| eicosenedioate (C20:1-DC)*                             | -2.16E-01 | 6.38E-02 | 8.04E-04 | -1.60E-01 | 6.23E-02 | 1.06E-02 | -1.64E-01 | 6.04E-02 | 6.90E-03 |
| hydroxy-N6,N6,N6-trimethyllysine*                      | -1.64E-01 | 6.56E-02 | 1.32E-02 | -3.89E-02 | 6.42E-02 | 5.45E-01 | -1.19E-01 | 6.20E-02 | 5.56E-02 |
| undecenoylcarnitine (C11:1)                            | -1.30E-01 | 5.86E-02 | 2.68E-02 | -6.59E-02 | 5.71E-02 | 2.49E-01 | -1.35E-01 | 5.50E-02 | 1.48E-02 |
| 3-decenoylcarnitine                                    | -3.52E-02 | 6.30E-02 | 5.76E-01 | 1.82E-02  | 6.10E-02 | 7.65E-01 | -5.60E-02 | 5.91E-02 | 3.44E-01 |
| 3-hydroxydecanoylcarnitine                             | -5.01E-02 | 6.03E-02 | 4.07E-01 | 2.71E-02  | 5.84E-02 | 6.43E-01 | -3.83E-02 | 5.67E-02 | 5.00E-01 |
| palmitoyl-sphingosine-phosphoethanolamine (d18:1/16:0) | -9.17E-02 | 6.32E-02 | 1.48E-01 | -8.01E-02 | 6.12E-02 | 1.92E-01 | -6.12E-03 | 5.97E-02 | 9.18E-01 |
| picolinoylglycine                                      | 8.76E-02  | 5.83E-02 | 1.34E-01 | 1.49E-01  | 5.59E-02 | 8.06E-03 | 3.84E-02  | 5.50E-02 | 4.86E-01 |

Supplementary Table 4: Parameter estimates for metabolome-wide association studies for diet-metabolite associations for each of: HEI-15, DASH and AMED diet, controlling for BMI

|                                                                     |           |          |          |           |          |          |           |          |          |
|---------------------------------------------------------------------|-----------|----------|----------|-----------|----------|----------|-----------|----------|----------|
| 4-vinylcatechol sulfate                                             | 1.16E-01  | 5.88E-02 | 5.00E-02 | 5.36E-02  | 5.72E-02 | 3.50E-01 | 7.20E-02  | 5.55E-02 | 1.96E-01 |
| succinoyltaurine                                                    | 3.01E-02  | 6.54E-02 | 6.46E-01 | 1.14E-01  | 6.30E-02 | 7.23E-02 | -1.27E-02 | 6.15E-02 | 8.36E-01 |
| phenylalanylhydroxyproline*                                         | -1.33E-01 | 6.51E-02 | 4.14E-02 | -5.48E-02 | 6.34E-02 | 3.88E-01 | 9.90E-04  | 6.16E-02 | 9.87E-01 |
| ginkgolic acid C15:1                                                | -1.77E-02 | 6.92E-02 | 7.98E-01 | 1.07E-02  | 6.70E-02 | 8.73E-01 | -6.21E-02 | 6.49E-02 | 3.40E-01 |
| (15:3)-anacardic acid                                               | 4.61E-02  | 6.55E-02 | 4.83E-01 | 3.80E-02  | 6.34E-02 | 5.50E-01 | 1.38E-03  | 6.17E-02 | 9.82E-01 |
| ginkgolic acid C17:1                                                | 5.31E-02  | 6.23E-02 | 3.95E-01 | 8.14E-02  | 6.02E-02 | 1.77E-01 | 1.05E-03  | 5.87E-02 | 9.86E-01 |
| 3,5-dichloro-2,6-dihydroxybenzoic acid                              | -2.54E-01 | 6.16E-02 | 5.11E-05 | -1.43E-01 | 6.09E-02 | 1.93E-02 | -2.22E-01 | 5.82E-02 | 1.72E-04 |
| metabolonic lactone sulfate                                         | -7.77E-02 | 5.56E-02 | 1.64E-01 | -1.02E-01 | 5.37E-02 | 5.89E-02 | -9.44E-02 | 5.22E-02 | 7.14E-02 |
| vanillic acid glycine                                               | 1.27E-01  | 6.13E-02 | 3.89E-02 | 1.96E-01  | 5.87E-02 | 9.62E-04 | 1.27E-01  | 5.76E-02 | 2.86E-02 |
| 2-hydroxy-4-(methylthio)butanoic acid                               | -1.19E-01 | 5.53E-02 | 3.25E-02 | -8.83E-02 | 5.37E-02 | 1.01E-01 | 3.95E-03  | 5.24E-02 | 9.40E-01 |
| branched chain 14:0 dicarboxylic acid**                             | 3.52E-01  | 5.72E-02 | 2.77E-09 | 2.80E-01  | 5.66E-02 | 1.24E-06 | 2.20E-01  | 5.58E-02 | 1.00E-04 |
| (2-butoxyethoxy)acetic acid                                         | 1.24E-02  | 6.72E-02 | 8.54E-01 | 6.15E-02  | 6.50E-02 | 3.44E-01 | -7.12E-02 | 6.30E-02 | 2.60E-01 |
| pentose acid*                                                       | 2.78E-01  | 5.47E-02 | 7.08E-07 | 1.30E-01  | 5.48E-02 | 1.88E-02 | 1.86E-01  | 5.26E-02 | 4.65E-04 |
| N-succinyl-phenylalanine                                            | 5.12E-02  | 6.61E-02 | 4.39E-01 | 3.57E-03  | 6.40E-02 | 9.56E-01 | -9.35E-03 | 6.22E-02 | 8.81E-01 |
| 1-methyl-5-imidazolelactate                                         | -1.79E-02 | 6.39E-02 | 7.80E-01 | -6.25E-02 | 6.18E-02 | 3.12E-01 | -1.61E-02 | 6.01E-02 | 7.88E-01 |
| (2 or 3)-decanoate (10:1n7 or n8)                                   | -8.94E-02 | 6.32E-02 | 1.58E-01 | -9.70E-02 | 6.11E-02 | 1.13E-01 | -6.34E-02 | 5.95E-02 | 2.87E-01 |
| chenodeoxycholic acid sulfate (1)                                   | -6.53E-02 | 6.38E-02 | 3.07E-01 | -4.82E-02 | 6.18E-02 | 4.36E-01 | -3.59E-02 | 6.00E-02 | 5.51E-01 |
| branched-chain, straight-chain, or cyclopropyl 10:1 fatty acid (1)* | -1.69E-01 | 6.24E-02 | 7.25E-03 | -2.11E-01 | 5.99E-02 | 5.09E-04 | -1.32E-01 | 5.89E-02 | 2.55E-02 |
| branched-chain, straight-chain, or cyclopropyl 10:1 fatty acid (2)* | -1.89E-01 | 6.55E-02 | 4.15E-03 | -1.91E-01 | 6.33E-02 | 2.75E-03 | -1.52E-01 | 6.18E-02 | 1.47E-02 |
| carnitine of C10H14O2 (5)*                                          | -9.03E-02 | 6.49E-02 | 1.65E-01 | 8.85E-03  | 6.31E-02 | 8.88E-01 | -5.04E-02 | 6.12E-02 | 4.11E-01 |
| 3-bromo-5-chloro-2,6-dihydroxybenzoic acid*                         | -2.21E-01 | 6.33E-02 | 5.59E-04 | -1.94E-01 | 6.15E-02 | 1.73E-03 | -2.75E-01 | 5.85E-02 | 4.15E-06 |
| branched-chain, straight-chain, or cyclopropyl 12:1 fatty acid*     | -1.56E-01 | 6.23E-02 | 1.28E-02 | -1.53E-01 | 6.02E-02 | 1.19E-02 | -1.20E-01 | 5.88E-02 | 4.19E-02 |
| decadienedioic acid (C10:2-DC)**                                    | -9.81E-02 | 6.32E-02 | 1.21E-01 | -1.16E-01 | 6.10E-02 | 5.80E-02 | -1.21E-01 | 5.92E-02 | 4.18E-02 |
| deoxycholic acid 12-sulfate*                                        | -4.56E-02 | 6.40E-02 | 4.77E-01 | -3.68E-02 | 6.19E-02 | 5.53E-01 | -7.03E-02 | 6.00E-02 | 2.43E-01 |
| GlcNAc sulfate conjugate of C21H34O2 steroid**                      | -3.00E-02 | 6.45E-02 | 6.42E-01 | -6.74E-02 | 6.23E-02 | 2.80E-01 | -7.61E-02 | 6.05E-02 | 2.09E-01 |
| cis-3,4-methyleneheptanoate                                         | -1.76E-01 | 6.42E-02 | 6.46E-03 | -4.99E-02 | 6.29E-02 | 4.28E-01 | -9.76E-02 | 6.09E-02 | 1.10E-01 |
| cis-3,4-methyleneheptanoylcarnitine                                 | -2.05E-01 | 6.33E-02 | 1.32E-01 | -6.98E-02 | 6.23E-02 | 2.64E-01 | -1.05E-01 | 6.03E-02 | 8.18E-02 |
| N-acetyl-2-aminoadipate                                             | -1.09E-01 | 5.82E-02 | 6.25E-02 | -7.69E-02 | 5.65E-02 | 1.75E-01 | -5.31E-02 | 5.50E-02 | 3.35E-01 |
| De(carboxymethoxy) cetirizine acetic acid                           | 8.42E-02  | 6.39E-02 | 1.89E-01 | 5.73E-02  | 6.19E-02 | 3.55E-01 | 1.41E-02  | 6.02E-02 | 8.16E-01 |
| 4-chlorobenzoic acid                                                | -4.41E-02 | 6.35E-02 | 4.88E-01 | -3.85E-02 | 6.15E-02 | 5.32E-01 | 1.03E-02  | 5.98E-02 | 8.64E-01 |
| torasemide                                                          | -5.38E-02 | 7.24E-02 | 4.58E-01 | -9.02E-02 | 7.00E-02 | 1.99E-01 | -1.27E-01 | 6.78E-02 | 6.21E-02 |
| 2-methoxyhydroquinone sulfate (1)                                   | -4.90E-03 | 6.37E-02 | 9.39E-01 | 4.58E-02  | 6.16E-02 | 4.58E-01 | 5.26E-02  | 5.98E-02 | 3.80E-01 |
| diazepam                                                            | 4.51E-02  | 7.23E-02 | 5.33E-01 | 8.38E-02  | 6.98E-02 | 2.31E-01 | 9.43E-02  | 6.78E-02 | 1.65E-01 |
| temazepam                                                           | 1.26E-01  | 7.21E-02 | 8.24E-02 | 7.17E-02  | 7.00E-02 | 3.06E-01 | 1.66E-01  | 6.74E-02 | 1.42E-02 |
| 2,4-di-tert-butylphenol                                             | -1.00E-01 | 6.63E-02 | 1.33E-01 | -1.43E-01 | 6.39E-02 | 2.59E-02 | -6.34E-02 | 6.25E-02 | 3.11E-01 |
| 3-hydroxyoctanoylcarnitine (1)                                      | -1.63E-02 | 6.05E-02 | 7.87E-01 | 2.43E-02  | 5.85E-02 | 6.78E-01 | -3.92E-02 | 5.68E-02 | 4.91E-01 |
| 3-hydroxyoctanoylcarnitine (2)                                      | -5.22E-03 | 6.03E-02 | 9.31E-01 | 3.10E-03  | 5.83E-02 | 9.58E-01 | -9.87E-03 | 5.67E-02 | 8.62E-01 |
| cis-3,4-methyleneheptanoylglycine                                   | -2.17E-01 | 6.37E-02 | 7.48E-04 | -1.29E-01 | 6.24E-02 | 3.90E-02 | -1.59E-01 | 6.04E-02 | 9.12E-03 |
| bilirubin degradation product, C16H18N2O5 (1)**                     | -7.02E-02 | 6.31E-02 | 2.66E-01 | -1.11E-01 | 6.08E-02 | 6.95E-02 | -2.42E-02 | 5.94E-02 | 6.85E-01 |
| bilirubin degradation product, C16H18N2O5 (2)**                     | -6.01E-02 | 6.19E-02 | 3.32E-01 | -9.35E-02 | 5.97E-02 | 1.18E-01 | 1.52E-03  | 5.83E-02 | 9.79E-01 |
| bilirubin degradation product, C17H18N2O4 (1)**                     | -8.36E-02 | 6.32E-02 | 1.87E-01 | -1.05E-01 | 6.11E-02 | 8.53E-02 | -1.36E-02 | 5.96E-02 | 8.20E-01 |
| bilirubin degradation product, C17H18N2O4 (2)**                     | -7.43E-02 | 6.23E-02 | 2.34E-01 | -1.03E-01 | 6.01E-02 | 8.64E-02 | -1.06E-02 | 5.87E-02 | 8.56E-01 |
| bilirubin degradation product, C17H18N2O4 (3)**                     | -8.87E-02 | 6.26E-02 | 1.58E-01 | -1.14E-01 | 6.04E-02 | 5.96E-02 | -1.51E-02 | 5.91E-02 | 7.98E-01 |
| bilirubin degradation product, C17H20N2O5 (1)**                     | -9.58E-02 | 6.40E-02 | 1.36E-01 | -1.17E-01 | 6.18E-02 | 5.99E-02 | -2.93E-02 | 6.04E-02 | 6.28E-01 |
| bilirubin degradation product, C17H20N2O5 (2)**                     | -1.01E-01 | 6.39E-02 | 1.15E-01 | -1.21E-01 | 6.17E-02 | 5.05E-02 | -1.88E-02 | 6.04E-02 | 7.56E-01 |
| tetrahydrocortisol glucuronide                                      | -2.47E-02 | 6.07E-02 | 6.84E-01 | -1.10E-01 | 5.84E-02 | 6.06E-02 | -5.49E-02 | 5.69E-02 | 3.36E-01 |
| bilirubin degradation product, C16H18N2O5 (3)**                     | -7.44E-02 | 6.15E-02 | 2.28E-01 | -8.01E-02 | 5.95E-02 | 1.79E-01 | 8.35E-03  | 5.79E-02 | 8.86E-01 |
| bilirubin degradation product, C16H18N2O5 (4)**                     | -8.99E-02 | 6.10E-02 | 1.42E-01 | -9.56E-02 | 5.90E-02 | 1.07E-01 | -3.01E-03 | 5.76E-02 | 9.58E-01 |
| N,N-dimethyl-pro-pro                                                | -1.02E-01 | 6.13E-02 | 9.63E-02 | 1.06E-02  | 5.96E-02 | 8.59E-01 | -1.08E-01 | 5.76E-02 | 6.05E-02 |
| oxindolylalanine                                                    | 1.85E-01  | 6.46E-02 | 4.51E-03 | 1.93E-01  | 6.24E-02 | 2.14E-03 | 1.21E-01  | 6.12E-02 | 4.82E-02 |
| tetrahydrocortisone glucuronide (5)                                 | -2.27E-02 | 5.86E-02 | 6.99E-01 | -3.83E-02 | 5.67E-02 | 5.00E-01 | -8.54E-02 | 5.49E-02 | 1.21E-01 |
| perfluorohexanesulfonic acid                                        | 5.71E-02  | 5.58E-02 | 3.07E-01 | 7.46E-03  | 5.41E-02 | 8.91E-02 | 3.98E-03  | 5.26E-02 | 9.40E-01 |
| trans-4-hydroxyproline                                              | -1.47E-01 | 6.10E-02 | 1.68E-02 | -1.28E-01 | 5.92E-02 | 3.13E-02 | -1.09E-01 | 5.76E-02 | 5.89E-02 |
| allantoin                                                           | 1.19E-01  | 6.29E-02 | 5.98E-02 | 1.80E-01  | 6.03E-02 | 3.04E-03 | 9.56E-02  | 5.92E-02 | 1.08E-01 |
| xanthine                                                            | -1.54E-01 | 5.99E-02 | 1.07E-02 | -1.20E-02 | 5.86E-02 | 8.38E-01 | -1.20E-01 | 5.65E-02 | 3.49E-02 |
| 5-oxoproline                                                        | 2.05E-02  | 6.27E-02 | 7.44E-01 | 5.06E-02  | 6.06E-02 | 4.04E-01 | 4.63E-03  | 5.89E-02 | 9.37E-01 |
| sarcosine                                                           | -8.56E-02 | 6.60E-02 | 1.96E-01 | -8.19E-02 | 6.39E-02 | 2.01E-01 | -1.09E-01 | 6.19E-02 | 8.01E-02 |
| pantothenate                                                        | 1.24E-01  | 5.95E-02 | 3.79E-02 | 1.50E-01  | 5.73E-02 | 9.38E-03 | 4.57E-02  | 5.63E-02 | 4.17E-01 |
| pipeolate                                                           | 1.14E-01  | 6.42E-02 | 7.64E-02 | 5.20E-02  | 6.24E-02 | 4.05E-01 | 1.29E-01  | 6.02E-02 | 3.26E-02 |
| phosphoethanolamine                                                 | 2.71E-02  | 6.76E-02 | 6.89E-01 | 7.82E-02  | 6.53E-02 | 2.32E-01 | 5.55E-02  | 6.35E-02 | 3.83E-01 |
| glycerate                                                           | 2.80E-01  | 5.76E-02 | 1.95E-06 | 2.70E-01  | 5.58E-02 | 2.18E-06 | 1.96E-01  | 5.52E-02 | 4.60E-04 |
| 3-ureidopropionate                                                  | 1.93E-01  | 5.83E-02 | 1.08E-03 | 1.24E-01  | 5.71E-02 | 3.03E-02 | 1.47E-01  | 5.52E-02 | 8.10E-03 |
| 5-KETE                                                              | -1.45E-02 | 5.90E-02 | 8.06E-01 | -2.33E-02 | 5.71E-02 | 6.83E-01 | 5.48E-03  | 5.55E-02 | 9.21E-01 |
| N-acetyl-leucine                                                    | -5.83E-02 | 5.69E-02 | 3.06E-01 | -3.56E-02 | 5.51E-02 | 5.19E-01 | 4.65E-03  | 5.36E-02 | 9.31E-01 |
| N-acetylmethionine                                                  | -1.25E-01 | 6.02E-02 | 3.80E-02 | 5.73E-02  | 5.86E-02 | 3.29E-01 | -1.15E-01 | 5.66E-02 | 4.26E-02 |
| N-acetylvaline                                                      | 4.81E-02  | 6.14E-02 | 4.34E-01 | 8.46E-02  | 5.93E-02 | 1.55E-01 | 2.44E-02  | 5.78E-02 | 6.73E-01 |
| erucate (22:1n9)                                                    | -1.49E-02 | 6.38E-02 | 8.15E-01 | -8.36E-02 | 6.15E-02 | 1.75E-01 | -1.65E-02 | 5.99E-02 | 7.83E-01 |
| bilirubin (Z,Z)                                                     | -8.00E-03 | 6.14E-02 | 8.96E-01 | -5.19E-02 | 5.93E-02 | 3.82E-01 | 4.05E-02  | 5.77E-02 | 4.83E-01 |
| thyroxine                                                           | -9.53E-03 | 6.36E-02 | 8.81E-01 | 7.22E-02  | 6.14E-02 | 2.40E-01 | -4.30E-02 | 5.97E-02 | 4.73E-01 |
| gamma-glutamyltyrosine                                              | 2.52E-02  | 5.76E-02 | 6.62E-01 | 5.07E-02  | 5.57E-02 | 3.64E-01 | 6.48E-03  | 5.42E-02 | 9.05E-01 |
| alpha-tocopherol                                                    | 1.48E-01  | 6.09E-02 | 1.59E-02 | -3.66E-04 | 5.95E-02 | 9.95E-01 | 7.52E-02  | 5.77E-02 | 1.93E-01 |
| 3-hydroxyisobutyrate                                                | -1.97E-02 | 6.24E-02 | 7.52E-01 | 3.24E-03  | 6.04E-02 | 9.57E-01 | -5.83E-02 | 5.86E-02 | 3.20E-01 |
| N-acetylalanine                                                     | -3.40E-02 | 6.24E-02 | 5.86E-01 | 1.40E-01  | 5.98E-02 | 1.96E-02 | -5.10E-02 | 5.86E-02 | 3.85E-01 |
| vanillylmandelate (VMA)                                             | 7.88E-02  | 5.89E-02 | 1.82E-01 | 1.24E-01  | 5.67E-02 | 2.98E-02 | 1.67E-02  | 5.55E-02 | 7.64E-01 |
| 4-acetamidobutanoate                                                | 1.88E-02  | 5.99E-02 | 7.54E-01 | 1.14E-01  | 5.76E-02 | 4.91E-02 | -5.90E-03 | 5.64E-02 | 9.17E-01 |
| 3-aminoisobutyrate                                                  | -6.65E-02 | 6.26E-02 | 2.89E-01 | -8.18E-02 | 6.05E-02 | 1.78E-01 | -5.05E-02 | 5.89E-02 | 3.92E-01 |
| 3-hydroxy-3-methylglutarate                                         | 6.87E-02  | 5.74E-02 | 2.32E-01 | 1.30E-01  | 5.52E-02 | 1.89E-02 | 6.93E-02  | 5.40E-02 | 2.00E-01 |
| citrate                                                             | -8.13E-02 | 6.06E-02 | 1.81E-01 | 2.73E-02  | 5.88E-02 | 6.43E-02 | -6.69E-02 | 5.70E-02 | 2.42E-01 |
| 2-aminobutyrate                                                     | -7.39E-02 | 6.37E-02 | 2.47E-01 | -2.16E-01 | 6.04E-02 | 4.16E-04 | -5.96E-03 | 6.00E-02 | 9.21E-01 |
| urate                                                               | -9.03E-03 | 5.20E-02 | 8.62E-01 | 3.22E-02  | 5.03E-02 | 5.23E-01 | 1.01E-02  | 4.89E-02 | 8.37E-01 |
| ursodeoxycholate                                                    | -1.62E-01 | 6.39E-02 | 1.21E-02 | -1.54E-01 | 6.19E-02 | 1.34E-02 | -2.31E-02 | 6.08E-02 | 7.04E-01 |
| oleoyl ethanolamide                                                 | -5.10E-02 | 6.23E-02 | 4.13E-01 | -8.62E-02 | 6.01E-02 | 1.53E-01 | -5.48E-03 | 5.86E-02 | 9.26E-01 |

Supplementary Table 4: Parameter estimates for metabolome-wide association studies for diet-metabolite associations for each of: HEI-15, DASH and AMED diet, controlling for BMI

|                                             |           |          |          |           |          |          |           |          |          |
|---------------------------------------------|-----------|----------|----------|-----------|----------|----------|-----------|----------|----------|
| gamma-glutamylglutamine                     | -4.91E-02 | 6.15E-02 | 4.26E-01 | 2.41E-03  | 5.96E-02 | 9.68E-01 | -3.64E-02 | 5.79E-02 | 5.30E-01 |
| 4-hydroxyphenylpyruvate                     | 9.43E-03  | 6.35E-02 | 8.82E-01 | 4.19E-02  | 6.14E-02 | 4.95E-01 | -1.89E-02 | 5.97E-02 | 7.52E-01 |
| butyrate/isobutyrate (4:0)                  | 3.41E-02  | 6.37E-02 | 5.92E-01 | 2.11E-02  | 6.17E-02 | 7.32E-01 | 7.56E-02  | 5.97E-02 | 2.07E-01 |
| N-acetylneuraminate                         | -1.21E-02 | 6.47E-02 | 8.52E-01 | 7.50E-02  | 6.24E-02 | 2.30E-01 | -9.45E-03 | 6.08E-02 | 8.77E-01 |
| homovanillate (HVA)                         | 7.37E-02  | 6.24E-02 | 2.39E-01 | 4.49E-02  | 6.05E-02 | 4.59E-01 | 3.35E-02  | 5.88E-02 | 5.69E-01 |
| creatine                                    | -1.10E-01 | 5.93E-02 | 6.54E-02 | -1.98E-01 | 5.65E-02 | 5.29E-04 | -2.71E-02 | 5.61E-02 | 6.29E-01 |
| cys-gly, oxidized                           | -1.52E-01 | 6.03E-02 | 1.21E-02 | -6.81E-02 | 5.89E-02 | 2.49E-01 | -1.42E-01 | 5.67E-02 | 1.27E-02 |
| 2,3-diphosphoglycerate                      | -6.65E-02 | 6.51E-02 | 3.08E-01 | -5.39E-03 | 6.31E-02 | 9.32E-01 | -3.11E-02 | 6.13E-02 | 6.12E-01 |
| estrone 3-sulfate                           | -2.17E-02 | 6.46E-02 | 7.37E-01 | -1.51E-01 | 6.19E-02 | 1.51E-02 | -8.20E-02 | 6.06E-02 | 1.77E-01 |
| dihomo-linoleate (20:2n6)                   | -1.49E-01 | 6.23E-02 | 1.77E-02 | -1.69E-01 | 6.01E-02 | 5.36E-03 | -1.04E-01 | 5.89E-02 | 7.98E-02 |
| gamma-glutamylhistidine                     | 8.97E-02  | 6.50E-02 | 1.69E-01 | 6.69E-02  | 6.30E-02 | 2.89E-01 | 8.62E-02  | 6.11E-02 | 1.60E-01 |
| 2-hydroxystearate                           | -1.14E-01 | 6.54E-02 | 8.16E-02 | -1.32E-01 | 6.31E-02 | 3.74E-02 | -1.20E-01 | 6.14E-02 | 5.23E-02 |
| N1-methyladenosine                          | -2.60E-02 | 6.09E-02 | 6.70E-01 | 5.86E-02  | 5.89E-02 | 3.20E-01 | -7.39E-02 | 5.71E-02 | 1.97E-01 |
| glycerol                                    | -1.37E-01 | 5.34E-02 | 1.09E-02 | -1.39E-01 | 5.16E-02 | 7.65E-03 | -1.02E-01 | 5.04E-02 | 4.38E-02 |
| choline                                     | -1.05E-02 | 6.38E-02 | 8.70E-01 | 6.10E-02  | 6.17E-02 | 3.23E-01 | 1.28E-02  | 6.00E-02 | 8.31E-01 |
| anthranilate                                | 6.06E-02  | 6.48E-02 | 3.50E-01 | -6.61E-02 | 6.27E-02 | 2.92E-01 | 7.12E-03  | 6.10E-02 | 9.07E-01 |
| gamma-glutamylleucine                       | -6.36E-02 | 5.78E-02 | 2.72E-01 | 2.82E-03  | 5.61E-02 | 9.60E-01 | -5.07E-02 | 5.44E-02 | 3.52E-01 |
| 3-phosphoglycerate                          | -1.80E-02 | 6.53E-02 | 7.82E-01 | 4.75E-03  | 6.32E-02 | 9.40E-01 | -3.72E-02 | 6.13E-02 | 5.44E-01 |
| 3-methoxytyrosine                           | -4.15E-02 | 6.14E-02 | 4.99E-01 | 5.65E-02  | 5.94E-02 | 3.42E-01 | -6.62E-02 | 5.76E-02 | 2.52E-01 |
| cholate                                     | 1.49E-02  | 6.50E-02 | 8.19E-01 | 1.54E-02  | 6.29E-02 | 8.06E-01 | 1.11E-01  | 6.08E-02 | 6.98E-02 |
| fluoxetine                                  | 9.50E-03  | 6.99E-02 | 8.92E-01 | -5.53E-02 | 6.76E-02 | 4.14E-01 | 4.81E-02  | 6.57E-02 | 4.64E-01 |
| 4-acetamidophenol                           | 6.30E-02  | 6.67E-02 | 3.45E-01 | 1.27E-01  | 6.42E-02 | 4.88E-02 | 7.31E-02  | 6.26E-02 | 2.44E-01 |
| naproxen                                    | 5.02E-02  | 6.54E-02 | 4.44E-01 | 1.14E-01  | 6.30E-02 | 7.19E-02 | 4.98E-02  | 6.15E-02 | 4.19E-01 |
| topiramate                                  | -2.57E-02 | 5.46E-02 | 6.38E-01 | -2.07E-02 | 5.28E-02 | 6.95E-01 | 4.23E-02  | 5.13E-02 | 4.10E-01 |
| beta-hydroxyisovalerate                     | -8.49E-02 | 5.82E-02 | 1.46E-01 | -8.29E-02 | 5.64E-02 | 1.43E-01 | -1.22E-02 | 5.50E-02 | 8.24E-01 |
| ibuprofen                                   | 4.41E-02  | 6.44E-02 | 4.95E-01 | -7.92E-02 | 6.22E-02 | 2.04E-01 | -6.40E-03 | 6.06E-02 | 9.16E-01 |
| arachidonoyl ethanolamide                   | -8.16E-02 | 6.10E-02 | 1.82E-01 | -8.50E-02 | 5.90E-02 | 1.51E-01 | -7.57E-03 | 5.76E-02 | 8.95E-01 |
| palmitoyl ethanolamide                      | -1.16E-01 | 6.23E-02 | 6.31E-02 | -1.30E-01 | 6.02E-02 | 3.11E-02 | -1.02E-01 | 5.86E-02 | 8.37E-02 |
| N-linoleoylglycine                          | -1.07E-02 | 6.58E-02 | 8.70E-01 | 6.15E-02  | 6.35E-02 | 3.34E-01 | 4.00E-02  | 6.18E-02 | 5.18E-01 |
| N-palmitoyl-sphingosine (d18:1/16:0)        | -3.19E-02 | 6.38E-02 | 6.17E-01 | -8.78E-02 | 6.15E-02 | 1.54E-01 | -5.32E-02 | 5.99E-02 | 3.75E-01 |
| 1-palmitoyl-2-oleoyl-GPE (16:0/18:1)        | 8.39E-02  | 6.48E-02 | 1.96E-01 | -1.97E-02 | 6.29E-02 | 7.54E-01 | 4.44E-02  | 6.10E-02 | 4.68E-01 |
| 1-palmitoyl-2-linoleoyl-GPI (16:0/18:2)     | -2.73E-02 | 6.46E-02 | 6.73E-01 | -7.59E-02 | 6.24E-02 | 2.25E-01 | 6.02E-03  | 6.07E-02 | 9.21E-01 |
| 1-palmitoyl-2-linoleoyl-GPC (16:0/18:2)     | -1.06E-01 | 6.37E-02 | 9.67E-02 | -1.82E-01 | 6.10E-02 | 3.12E-03 | -3.87E-02 | 6.01E-02 | 5.20E-01 |
| stearoyl sphingomyelin (d18:1/18:0)         | -2.09E-01 | 6.07E-02 | 6.83E-04 | -2.02E-01 | 5.88E-02 | 6.79E-04 | -1.85E-01 | 5.72E-02 | 1.38E-03 |
| 1-palmitoyl-2-oleoyl-GPC (16:0/18:1)        | -6.00E-02 | 6.42E-02 | 3.51E-01 | -2.09E-01 | 6.10E-02 | 6.98E-04 | -3.98E-02 | 6.05E-02 | 5.11E-01 |
| N-stearoyl-sphingosine (d18:1/18:0)*        | -1.28E-01 | 6.20E-02 | 4.06E-02 | -1.51E-01 | 5.98E-02 | 1.22E-02 | -1.52E-01 | 5.80E-02 | 9.39E-03 |
| 5,6-dihydrothymine                          | -6.67E-02 | 6.21E-02 | 2.84E-01 | -5.82E-02 | 6.01E-02 | 3.34E-01 | -1.31E-01 | 5.80E-02 | 2.44E-02 |
| glycochenodeoxycholate                      | 1.83E-02  | 6.49E-02 | 7.78E-01 | -5.47E-03 | 6.28E-02 | 9.31E-01 | -5.60E-02 | 6.09E-02 | 3.59E-01 |
| taurochenodeoxycholate                      | -1.59E-02 | 6.55E-02 | 8.08E-01 | -3.24E-02 | 6.34E-02 | 6.09E-01 | -6.91E-02 | 6.14E-02 | 2.62E-01 |
| taurocholate                                | 6.66E-03  | 6.52E-02 | 9.15E-01 | 1.89E-02  | 6.31E-02 | 7.65E-01 | -2.44E-02 | 6.12E-02 | 6.91E-01 |
| taurodeoxycholate                           | 9.53E-03  | 6.59E-02 | 8.85E-01 | 1.32E-02  | 6.38E-02 | 8.36E-01 | -9.64E-02 | 6.17E-02 | 1.19E-01 |
| hypoxanthine                                | -5.87E-02 | 6.65E-02 | 3.78E-01 | 1.47E-02  | 6.44E-02 | 8.20E-01 | -4.28E-03 | 6.26E-02 | 9.46E-01 |
| 9,10-DiHOME                                 | 5.46E-02  | 6.44E-02 | 3.97E-01 | 1.77E-01  | 6.15E-02 | 4.36E-03 | 6.05E-02  | 6.05E-02 | 3.21E-01 |
| linoleate (18:2n6)                          | -1.18E-01 | 6.08E-02 | 5.42E-02 | -1.14E-01 | 5.89E-02 | 5.37E-02 | -7.95E-02 | 5.74E-02 | 1.67E-01 |
| laurate (12:0)                              | -1.19E-01 | 6.09E-02 | 5.22E-02 | -2.60E-02 | 5.94E-02 | 6.61E-01 | -7.54E-02 | 5.75E-02 | 1.91E-01 |
| quinolinate                                 | -5.70E-02 | 6.09E-02 | 3.50E-01 | 4.70E-02  | 5.90E-02 | 4.26E-01 | -1.51E-01 | 5.67E-02 | 7.94E-03 |
| 2-hydroxyhippurate (salicylurate)           | 1.23E-01  | 6.55E-02 | 6.16E-02 | 1.98E-01  | 6.26E-02 | 1.73E-03 | 4.89E-02  | 6.19E-02 | 4.30E-01 |
| N6,N6,N6-trimethyllysine                    | -8.36E-02 | 6.14E-02 | 1.74E-01 | -9.33E-04 | 5.96E-02 | 9.88E-01 | -5.40E-02 | 5.78E-02 | 3.51E-01 |
| N-acetylputrescine                          | -6.77E-03 | 6.28E-02 | 9.14E-01 | -4.37E-02 | 6.08E-02 | 4.73E-01 | -3.24E-02 | 5.90E-02 | 5.84E-01 |
| N-formylmethionine                          | -6.99E-02 | 6.14E-02 | 2.56E-01 | 7.04E-02  | 5.94E-02 | 2.37E-01 | -1.04E-01 | 5.75E-02 | 7.19E-02 |
| S-adenosylhomocysteine (SAH)                | 4.21E-02  | 6.14E-02 | 4.94E-01 | 1.23E-01  | 5.90E-02 | 3.73E-02 | -4.12E-02 | 5.77E-02 | 4.76E-01 |
| metoprolol                                  | 7.03E-02  | 6.82E-02 | 3.04E-01 | 1.41E-01  | 6.56E-02 | 3.21E-02 | 9.49E-02  | 6.40E-02 | 1.39E-01 |
| azelate (C9-DC)                             | 1.48E-02  | 6.48E-02 | 8.20E-01 | 9.45E-02  | 6.25E-02 | 1.32E-01 | -6.41E-02 | 6.08E-02 | 2.93E-01 |
| 3-(N-acetyl-L-cystein-S-yl) acetaminophen   | 9.35E-02  | 6.42E-02 | 1.47E-01 | 1.41E-01  | 6.18E-02 | 2.29E-02 | 5.02E-02  | 6.05E-02 | 4.08E-01 |
| 4-acetaminophen sulfate                     | 1.11E-01  | 6.58E-02 | 9.19E-02 | 1.66E-01  | 6.32E-02 | 9.12E-03 | 8.43E-02  | 6.19E-02 | 1.74E-01 |
| eicosapentaenoate (EPA; 20:5n3)             | -8.15E-03 | 6.30E-02 | 8.97E-01 | -9.43E-02 | 6.07E-02 | 1.21E-01 | 6.23E-02  | 5.91E-02 | 2.93E-01 |
| methylsuccinate                             | 2.07E-01  | 6.11E-02 | 7.93E-04 | 1.73E-01  | 5.95E-02 | 3.86E-03 | 1.65E-01  | 5.78E-02 | 4.68E-03 |
| ethylmalonate                               | -1.45E-02 | 6.03E-02 | 8.09E-01 | -1.32E-02 | 5.83E-02 | 8.21E-01 | -2.13E-02 | 5.66E-02 | 7.07E-01 |
| adenosine 3',5'-cyclic monophosphate (cAMP) | 6.23E-03  | 6.41E-02 | 9.23E-01 | 7.86E-02  | 6.19E-02 | 2.05E-01 | -3.86E-02 | 6.02E-02 | 5.22E-01 |
| adenosine 5'-monophosphate (AMP)            | -7.05E-03 | 6.40E-02 | 9.12E-01 | 6.92E-02  | 6.18E-02 | 2.64E-01 | 1.57E-02  | 6.02E-02 | 7.94E-01 |
| 5-methylthioadenosine (MTA)                 | -3.29E-02 | 6.19E-02 | 5.95E-01 | 2.75E-02  | 5.99E-02 | 6.46E-01 | -2.77E-02 | 5.82E-02 | 6.34E-01 |
| N6-methyladenosine                          | -7.30E-02 | 6.25E-02 | 2.44E-01 | 1.66E-03  | 6.06E-02 | 9.78E-01 | -9.36E-02 | 5.86E-02 | 1.11E-01 |
| arachidonate (20:4n6)                       | -1.41E-01 | 6.55E-02 | 3.27E-02 | -1.91E-01 | 6.29E-02 | 2.67E-03 | -1.09E-01 | 6.18E-02 | 7.93E-02 |
| arginine                                    | 6.64E-02  | 6.79E-02 | 3.29E-01 | 7.23E-02  | 6.57E-02 | 2.72E-01 | 6.53E-02  | 6.38E-02 | 3.07E-01 |
| aspartate                                   | 6.40E-02  | 6.09E-02 | 2.94E-01 | 3.66E-02  | 5.90E-02 | 5.36E-01 | 4.07E-02  | 5.73E-02 | 4.79E-01 |
| 2-hydroxyphenylacetate                      | 4.91E-02  | 6.35E-02 | 4.40E-01 | 1.10E-01  | 6.11E-02 | 7.32E-02 | 5.96E-02  | 5.96E-02 | 3.18E-01 |
| 3-(4-hydroxyphenyl)lactate                  | -1.77E-02 | 5.30E-02 | 7.38E-01 | 2.41E-03  | 5.13E-02 | 9.63E-01 | 3.44E-02  | 4.98E-02 | 4.90E-01 |
| phenylpyruvate                              | -2.50E-04 | 6.28E-02 | 9.97E-01 | 9.30E-02  | 6.06E-02 | 1.26E-01 | -2.90E-03 | 5.91E-02 | 9.61E-01 |
| beta-alanine                                | 2.11E-02  | 6.32E-02 | 7.39E-01 | 9.18E-02  | 6.09E-02 | 1.33E-01 | -1.54E-02 | 5.94E-02 | 7.95E-01 |
| biliverdin                                  | -8.98E-02 | 6.32E-02 | 1.56E-01 | -8.42E-02 | 6.11E-02 | 1.70E-01 | -4.56E-02 | 5.95E-02 | 4.45E-01 |
| succinate                                   | 5.81E-02  | 6.30E-02 | 3.58E-01 | 4.24E-02  | 6.11E-02 | 4.88E-01 | 7.61E-02  | 5.92E-02 | 2.00E-01 |
| 3-hydroxybutyrate (BHBA)                    | -4.23E-02 | 6.06E-02 | 4.86E-01 | -7.85E-02 | 5.86E-02 | 1.81E-01 | 8.02E-03  | 5.71E-02 | 8.88E-01 |
| cholesterol                                 | 2.77E-02  | 6.37E-02 | 6.64E-01 | -5.86E-02 | 6.16E-02 | 3.42E-01 | 3.98E-02  | 5.98E-02 | 5.07E-01 |
| corticosterone                              | -1.31E-03 | 6.05E-02 | 9.83E-01 | -8.82E-02 | 5.83E-02 | 1.32E-01 | -5.15E-02 | 5.68E-02 | 3.65E-01 |
| cortisone                                   | -3.02E-02 | 6.35E-02 | 6.35E-01 | -1.47E-01 | 6.09E-02 | 1.65E-02 | -4.22E-02 | 5.97E-02 | 4.80E-01 |
| creatinine                                  | -4.79E-02 | 5.36E-02 | 3.72E-01 | 4.04E-02  | 5.19E-02 | 4.37E-01 | -6.36E-02 | 5.03E-02 | 2.07E-01 |
| cysteinylglycine                            | -1.34E-01 | 6.00E-02 | 2.62E-02 | -8.99E-02 | 5.84E-02 | 1.25E-01 | -8.80E-02 | 5.67E-02 | 1.22E-01 |
| cystine                                     | -2.49E-01 | 6.01E-02 | 4.51E-05 | -2.35E-01 | 5.83E-02 | 7.10E-05 | -1.97E-01 | 5.72E-02 | 1.90E-03 |
| sphingosine                                 | -1.03E-01 | 6.45E-02 | 1.10E-01 | -7.76E-02 | 6.25E-02 | 2.15E-01 | -6.84E-02 | 6.08E-02 | 2.62E-01 |
| deoxycholate                                | -7.14E-02 | 6.31E-02 | 2.59E-01 | -9.14E-02 | 6.09E-02 | 1.35E-01 | -1.90E-02 | 5.94E-02 | 7.50E-01 |
| cyathionine                                 | 9.48E-02  | 6.63E-02 | 1.54E-01 | 1.54E-01  | 6.38E-02 | 1.62E-02 | 8.36E-02  | 6.24E-02 | 1.81E-01 |
| sphinganine                                 | -7.18E-02 | 6.60E-02 | 2.77E-01 | -5.36E-02 | 6.39E-02 | 4.02E-01 | -8.49E-02 | 6.19E-02 | 1.72E-01 |

Supplementary Table 4: Parameter estimates for metabolome-wide association studies for diet-metabolite associations for each of: HEI-15, DASH and AMED diet, controlling for BMI

|                                      |           |          |          |           |          |          |           |          |          |
|--------------------------------------|-----------|----------|----------|-----------|----------|----------|-----------|----------|----------|
| flavin adenine dinucleotide (FAD)    | 7.31E-02  | 6.68E-02 | 2.75E-01 | 2.63E-02  | 6.48E-02 | 6.85E-01 | 6.32E-02  | 6.28E-02 | 3.15E-01 |
| fumarate                             | -4.24E-02 | 6.07E-02 | 4.86E-01 | -1.35E-02 | 5.88E-02 | 8.19E-01 | 5.96E-03  | 5.72E-02 | 9.17E-01 |
| gamma-glutamylglutamate              | -5.33E-02 | 5.95E-02 | 3.72E-01 | -1.38E-02 | 5.77E-02 | 8.11E-01 | -4.57E-02 | 5.60E-02 | 4.14E-01 |
| gluconate                            | -2.39E-02 | 6.16E-02 | 6.98E-01 | 7.80E-02  | 5.95E-02 | 1.91E-01 | 3.81E-03  | 5.79E-02 | 9.48E-01 |
| glutarate (C5-DC)                    | -1.56E-01 | 6.00E-02 | 9.73E-03 | -6.30E-02 | 5.86E-02 | 2.84E-01 | 7.10E-02  | 5.69E-02 | 2.13E-01 |
| glycine                              | -1.15E-01 | 6.20E-02 | 6.52E-02 | 9.45E-03  | 6.04E-02 | 8.76E-01 | -1.00E-01 | 5.84E-02 | 8.68E-02 |
| glycocholate                         | 2.42E-02  | 6.47E-02 | 7.08E-01 | 4.31E-02  | 6.26E-02 | 4.92E-01 | -1.74E-02 | 6.08E-02 | 7.75E-01 |
| guanidinoacetate                     | 1.31E-02  | 6.20E-02 | 8.34E-01 | 3.18E-02  | 6.00E-02 | 5.96E-01 | 2.26E-02  | 5.83E-02 | 6.99E-01 |
| S-1-pyrroline-5-carboxylate          | -9.17E-03 | 6.12E-02 | 8.81E-01 | 3.72E-02  | 5.92E-02 | 5.30E-01 | -5.63E-04 | 5.75E-02 | 9.92E-01 |
| histidine                            | 8.84E-02  | 6.24E-02 | 1.58E-01 | -2.49E-06 | 6.06E-02 | 1.00E+00 | 5.96E-02  | 5.87E-02 | 3.11E-01 |
| cortisol                             | -1.30E-02 | 6.39E-02 | 8.39E-01 | -1.08E-01 | 6.16E-02 | 8.17E-02 | -6.57E-02 | 6.00E-02 | 2.74E-01 |
| hypotaurine                          | -1.48E-03 | 5.74E-02 | 9.79E-01 | 6.10E-02  | 5.54E-02 | 2.72E-01 | 3.38E-02  | 5.39E-02 | 5.31E-01 |
| inosine                              | -5.15E-03 | 6.37E-02 | 9.36E-01 | 3.89E-02  | 6.16E-02 | 5.29E-01 | 3.16E-02  | 5.99E-02 | 5.98E-01 |
| myo-inositol                         | 2.32E-01  | 5.90E-02 | 1.04E-04 | 1.42E-01  | 5.80E-02 | 1.49E-02 | 1.85E-01  | 5.59E-02 | 1.02E-03 |
| isoleucine                           | -7.44E-02 | 5.42E-02 | 1.71E-01 | -1.03E-02 | 5.27E-02 | 8.45E-01 | -4.29E-02 | 5.11E-02 | 4.02E-01 |
| 2-aminoadipate                       | -8.54E-03 | 6.19E-02 | 8.90E-01 | -1.65E-02 | 5.99E-02 | 7.83E-01 | 1.33E-02  | 5.82E-02 | 8.19E-01 |
| citrulline                           | -5.93E-02 | 6.45E-02 | 3.58E-01 | 8.40E-03  | 6.25E-02 | 8.93E-01 | 4.10E-02  | 6.07E-02 | 5.00E-01 |
| leucine                              | -2.54E-02 | 5.49E-02 | 6.44E-01 | -1.43E-02 | 5.32E-02 | 7.89E-01 | -4.31E-02 | 5.16E-02 | 4.05E-01 |
| lithocholate                         | -3.83E-03 | 6.46E-02 | 9.53E-01 | 5.18E-02  | 6.25E-02 | 4.08E-01 | -2.03E-02 | 6.08E-02 | 7.38E-01 |
| lysine                               | -6.22E-02 | 6.40E-02 | 3.32E-01 | -3.74E-02 | 6.20E-02 | 5.47E-01 | -1.11E-01 | 5.99E-02 | 6.43E-02 |
| malate                               | -6.24E-02 | 6.28E-02 | 3.22E-01 | 1.14E-02  | 6.09E-02 | 8.52E-01 | -1.83E-02 | 5.92E-02 | 7.57E-01 |
| methionine                           | -1.21E-01 | 5.98E-02 | 4.30E-02 | -2.91E-02 | 5.82E-02 | 6.18E-01 | -1.04E-01 | 5.62E-02 | 6.48E-02 |
| methylmalonate (MMA)                 | -6.53E-02 | 6.23E-02 | 2.95E-01 | 3.93E-02  | 6.04E-02 | 5.15E-01 | 1.27E-03  | 5.87E-02 | 9.83E-01 |
| palmitate (16:0)                     | -1.90E-01 | 6.15E-02 | 2.19E-03 | -1.93E-01 | 5.94E-02 | 1.28E-03 | -1.63E-01 | 5.80E-02 | 5.29E-03 |
| nicotinamide                         | 2.50E-02  | 6.51E-02 | 7.02E-01 | 1.38E-01  | 6.25E-02 | 2.76E-02 | 2.63E-02  | 6.12E-02 | 6.68E-01 |
| stearate (18:0)                      | -1.76E-01 | 6.34E-02 | 6.00E-03 | -1.34E-01 | 6.17E-02 | 3.12E-02 | -1.35E-01 | 5.99E-02 | 2.53E-02 |
| ornithine                            | -3.07E-02 | 6.47E-02 | 6.35E-01 | 3.13E-02  | 6.26E-02 | 6.17E-01 | 3.28E-02  | 6.08E-02 | 5.91E-01 |
| orotate                              | 4.67E-03  | 6.36E-02 | 9.42E-01 | -3.73E-03 | 6.15E-02 | 9.52E-01 | -1.83E-02 | 5.97E-02 | 7.60E-01 |
| palmitoleate (16:1n7)                | -1.70E-01 | 5.60E-02 | 2.60E-03 | -2.03E-01 | 5.37E-02 | 1.90E-04 | -1.27E-01 | 5.29E-02 | 1.74E-02 |
| phenylalanine                        | -1.57E-02 | 6.25E-02 | 8.02E-01 | 6.74E-03  | 6.05E-02 | 9.11E-01 | -4.81E-02 | 5.87E-02 | 4.14E-01 |
| phosphate                            | -2.83E-02 | 6.43E-02 | 6.60E-01 | 1.68E-02  | 6.22E-02 | 7.88E-01 | -6.98E-03 | 6.05E-02 | 9.08E-01 |
| phytanate                            | -5.75E-02 | 5.92E-02 | 3.32E-01 | -8.99E-02 | 5.71E-02 | 1.17E-01 | -4.83E-02 | 5.57E-02 | 3.86E-01 |
| proline                              | -1.71E-01 | 6.15E-02 | 5.68E-03 | -5.27E-02 | 6.03E-02 | 3.82E-02 | -1.14E-01 | 5.82E-02 | 5.09E-02 |
| lactate                              | -1.94E-02 | 5.76E-02 | 7.36E-01 | 1.02E-02  | 5.58E-02 | 8.55E-01 | 1.16E-02  | 5.42E-02 | 8.30E-01 |
| pyridoxal                            | 1.60E-01  | 6.47E-02 | 1.40E-02 | 1.19E-01  | 6.29E-02 | 6.05E-02 | 9.27E-02  | 6.12E-02 | 1.31E-01 |
| retinol (Vitamin A)                  | 7.94E-02  | 6.20E-02 | 2.01E-01 | 3.58E-02  | 6.01E-02 | 5.52E-01 | 1.09E-02  | 5.84E-02 | 8.53E-01 |
| spermidine                           | -1.95E-02 | 6.48E-02 | 7.64E-01 | 8.77E-02  | 6.25E-02 | 1.62E-01 | -3.19E-02 | 6.09E-02 | 6.00E-01 |
| salicylate                           | 1.22E-01  | 6.68E-02 | 6.79E-02 | 2.01E-01  | 6.39E-02 | 1.85E-03 | 5.18E-02  | 6.31E-02 | 4.12E-01 |
| serine                               | -1.46E-01 | 6.13E-02 | 1.79E-02 | -1.45E-01 | 5.92E-02 | 1.49E-02 | -6.84E-02 | 5.80E-02 | 2.39E-01 |
| serotonin                            | 7.18E-02  | 6.73E-02 | 2.87E-01 | 6.74E-02  | 6.52E-02 | 3.02E-01 | 5.71E-02  | 6.33E-02 | 3.68E-01 |
| taurine                              | 5.83E-02  | 6.73E-02 | 3.87E-01 | 3.33E-02  | 6.52E-02 | 6.10E-01 | 7.93E-02  | 6.32E-02 | 2.10E-01 |
| myristate (14:0)                     | -2.10E-01 | 5.76E-02 | 3.13E-04 | -1.65E-01 | 5.62E-02 | 3.69E-03 | -1.71E-01 | 5.45E-02 | 1.85E-03 |
| urea                                 | 5.58E-02  | 6.37E-02 | 3.82E-01 | 1.18E-01  | 6.14E-02 | 5.62E-02 | 6.30E-02  | 5.99E-02 | 2.94E-01 |
| uridine                              | 1.04E-01  | 6.40E-02 | 1.04E-01 | 1.13E-01  | 6.19E-02 | 6.92E-02 | 9.59E-02  | 6.02E-02 | 1.12E-01 |
| 2'-deoxyuridine                      | 5.86E-03  | 6.60E-02 | 9.29E-01 | 1.20E-02  | 6.39E-02 | 8.51E-01 | 4.84E-03  | 6.21E-02 | 9.38E-01 |
| trans-urocanate                      | -8.69E-02 | 6.35E-02 | 1.72E-01 | -2.60E-02 | 6.16E-02 | 6.73E-01 | -4.26E-02 | 5.98E-02 | 4.77E-01 |
| 1-methylnicotinamide                 | -6.87E-02 | 6.49E-02 | 2.91E-01 | -4.65E-02 | 6.29E-02 | 4.60E-01 | -1.17E-01 | 6.07E-02 | 5.50E-02 |
| glutamate                            | -2.49E-02 | 5.65E-02 | 6.59E-01 | -6.66E-03 | 5.47E-02 | 9.03E-01 | -2.41E-02 | 5.31E-02 | 6.50E-01 |
| glutamine                            | -3.35E-02 | 6.10E-02 | 5.84E-01 | -2.20E-02 | 5.91E-02 | 7.09E-01 | -4.32E-02 | 5.73E-02 | 4.52E-01 |
| threonine                            | -1.76E-01 | 6.37E-02 | 6.04E-03 | -9.21E-02 | 6.22E-02 | 1.40E-01 | -8.93E-02 | 6.04E-02 | 1.41E-01 |
| tryptophan                           | 8.20E-02  | 5.95E-02 | 1.70E-01 | 6.93E-02  | 5.77E-02 | 2.30E-01 | 1.28E-02  | 5.62E-02 | 8.19E-01 |
| valine                               | -1.88E-02 | 5.84E-02 | 7.47E-01 | 3.13E-02  | 5.65E-02 | 5.80E-01 | 1.03E-02  | 5.49E-02 | 8.51E-01 |
| glucose                              | -1.25E-01 | 6.41E-02 | 5.22E-02 | -1.45E-01 | 6.19E-02 | 1.97E-02 | -1.06E-01 | 6.04E-02 | 7.92E-02 |
| 12,13-DiHOME                         | 7.54E-02  | 6.08E-02 | 2.16E-01 | 1.48E-01  | 5.84E-02 | 1.16E-02 | 7.17E-02  | 5.72E-02 | 2.11E-01 |
| alpha-ketobutyrate                   | -6.93E-02 | 6.32E-02 | 2.74E-01 | -1.35E-01 | 6.08E-02 | 2.76E-02 | -1.05E-02 | 5.95E-02 | 8.60E-01 |
| betaine                              | 1.38E-01  | 6.25E-02 | 2.78E-02 | 1.36E-01  | 6.05E-02 | 2.55E-02 | 1.56E-01  | 5.85E-02 | 8.02E-03 |
| cysteine                             | -9.14E-02 | 6.16E-02 | 1.39E-01 | -3.74E-02 | 5.98E-02 | 5.32E-01 | -1.23E-01 | 5.77E-02 | 3.38E-02 |
| mannose                              | -1.35E-01 | 5.90E-02 | 2.31E-02 | -1.51E-01 | 5.69E-02 | 8.37E-03 | -1.36E-01 | 5.54E-02 | 1.48E-02 |
| dimethylglycine                      | 7.46E-02  | 6.29E-02 | 2.37E-01 | 1.22E-01  | 6.06E-02 | 4.56E-02 | 6.66E-02  | 5.92E-02 | 2.62E-01 |
| alanine                              | -1.53E-01 | 6.44E-02 | 1.82E-02 | -1.20E-01 | 6.25E-02 | 5.63E-02 | -1.32E-01 | 6.06E-02 | 2.99E-02 |
| tyrosine                             | 6.60E-02  | 5.93E-02 | 2.67E-01 | 9.30E-03  | 5.76E-02 | 8.72E-01 | 2.78E-02  | 5.59E-02 | 6.19E-01 |
| pseudouridine                        | -1.86E-03 | 5.92E-02 | 9.75E-01 | 7.72E-02  | 5.71E-02 | 1.77E-01 | -6.06E-02 | 5.55E-02 | 2.76E-01 |
| pyruvate                             | -8.73E-02 | 6.12E-02 | 1.55E-01 | -5.10E-02 | 5.93E-02 | 3.90E-01 | -7.05E-02 | 5.75E-02 | 2.21E-01 |
| uracil                               | 8.53E-02  | 6.13E-02 | 1.65E-01 | 1.27E-01  | 5.90E-02 | 3.22E-02 | 1.71E-01  | 5.69E-02 | 2.87E-03 |
| xylose                               | 1.64E-01  | 6.66E-02 | 1.45E-02 | 1.19E-01  | 6.47E-02 | 6.76E-02 | 1.27E-01  | 6.28E-02 | 4.39E-02 |
| cytidine                             | -3.25E-02 | 6.45E-02 | 6.15E-01 | 5.65E-02  | 6.24E-02 | 3.66E-01 | 3.02E-02  | 6.07E-02 | 6.19E-01 |
| arabinose                            | 7.71E-02  | 6.25E-02 | 2.19E-01 | 5.50E-02  | 6.06E-02 | 3.65E-01 | 1.05E-01  | 5.86E-02 | 7.47E-02 |
| cotinine                             | -7.76E-02 | 4.68E-02 | 9.82E-02 | -1.06E-01 | 4.50E-02 | 1.89E-02 | -2.03E-02 | 4.42E-02 | 6.45E-01 |
| caffeine                             | -1.19E-01 | 6.41E-02 | 6.56E-02 | -1.23E-01 | 6.20E-02 | 4.81E-02 | -7.69E-02 | 6.05E-02 | 2.05E-01 |
| fructose                             | -1.23E-02 | 6.50E-02 | 8.50E-01 | -4.62E-02 | 6.29E-02 | 4.63E-01 | 8.77E-03  | 6.11E-02 | 8.86E-01 |
| adenine                              | -6.15E-02 | 6.40E-02 | 3.37E-01 | -5.60E-02 | 6.19E-02 | 3.66E-01 | -1.03E-01 | 5.99E-02 | 8.80E-02 |
| cytosine                             | 8.43E-02  | 6.48E-02 | 1.94E-01 | 3.52E-02  | 6.29E-02 | 5.76E-01 | 6.99E-02  | 6.10E-02 | 2.53E-01 |
| caprate (10:0)                       | -1.31E-01 | 6.20E-02 | 3.49E-02 | -1.15E-01 | 6.01E-02 | 5.68E-02 | -5.65E-02 | 5.87E-02 | 3.36E-01 |
| margarate (17:0)                     | -2.36E-01 | 6.27E-02 | 2.05E-04 | -1.88E-01 | 6.12E-02 | 2.32E-03 | -1.97E-01 | 5.92E-02 | 9.78E-04 |
| nonadecanoate (19:0)                 | -1.29E-01 | 6.27E-02 | 4.12E-02 | -9.22E-02 | 6.09E-02 | 1.31E-01 | -1.05E-01 | 5.91E-02 | 7.63E-02 |
| arachidate (20:0)                    | -2.44E-02 | 6.23E-02 | 6.96E-01 | 1.44E-02  | 6.04E-02 | 8.12E-01 | -2.18E-02 | 5.86E-02 | 7.11E-01 |
| maltose                              | 1.71E-02  | 6.69E-02 | 7.99E-01 | 9.87E-02  | 6.45E-02 | 1.27E-01 | 4.04E-02  | 6.29E-02 | 5.21E-01 |
| asparagine                           | 1.87E-02  | 6.17E-02 | 7.63E-01 | 5.49E-02  | 5.96E-02 | 3.58E-01 | 3.75E-02  | 5.80E-02 | 5.18E-01 |
| N-stearoyl-sphinganine (d18:0/18:0)* | -1.72E-01 | 6.13E-02 | 5.39E-03 | -2.72E-01 | 5.79E-02 | 4.15E-06 | -1.61E-01 | 5.76E-02 | 5.55E-03 |
| dihydroorotate                       | 3.37E-02  | 6.42E-02 | 6.00E-01 | -2.58E-02 | 6.21E-02 | 6.78E-01 | -4.79E-02 | 6.03E-02 | 4.28E-01 |
| alpha-ketoglutarate                  | -9.79E-02 | 6.08E-02 | 1.09E-01 | -3.24E-02 | 5.91E-02 | 5.84E-01 | -5.56E-02 | 5.74E-02 | 3.33E-01 |
| caprylate (8:0)                      | -6.49E-02 | 6.49E-02 | 3.18E-01 | -1.09E-01 | 6.26E-02 | 8.12E-02 | 8.50E-03  | 6.11E-02 | 8.89E-01 |

Supplementary Table 4: Parameter estimates for metabolome-wide association studies for diet-metabolite associations for each of: HEI-15, DASH and AMED diet, controlling for BMI

|                       |           |          |          |           |          |          |           |          |          |
|-----------------------|-----------|----------|----------|-----------|----------|----------|-----------|----------|----------|
| sucrose               | 4.07E-02  | 5.95E-02 | 4.94E-01 | 1.70E-01  | 5.67E-02 | 3.01E-03 | -5.05E-03 | 5.60E-02 | 9.28E-01 |
| kynurenate            | 3.01E-02  | 5.91E-02 | 6.10E-01 | 4.04E-02  | 5.71E-02 | 4.80E-01 | -5.20E-02 | 5.55E-02 | 3.50E-01 |
| pentadecanoate (15:0) | -2.17E-01 | 5.81E-02 | 2.35E-04 | -1.54E-01 | 5.69E-02 | 7.36E-03 | -1.95E-01 | 5.47E-02 | 4.26E-04 |
| X-07765               | -1.26E-01 | 6.40E-02 | 4.95E-02 | -7.14E-02 | 6.22E-02 | 2.52E-01 | -1.24E-01 | 6.01E-02 | 4.04E-02 |
| X-10458               | 1.04E-01  | 6.32E-02 | 9.99E-02 | 9.77E-02  | 6.12E-02 | 1.12E-01 | 5.53E-02  | 5.97E-02 | 3.55E-01 |
| X-11299               | -6.00E-02 | 6.78E-02 | 3.77E-01 | -1.41E-01 | 6.51E-02 | 3.13E-02 | -5.29E-02 | 6.37E-02 | 4.08E-01 |
| X-11308               | -1.92E-01 | 6.17E-02 | 2.01E-03 | -1.82E-01 | 5.97E-02 | 2.55E-03 | -1.23E-01 | 5.85E-02 | 3.66E-02 |
| X-11315               | 3.91E-01  | 5.47E-02 | 7.83E-12 | 2.80E-01  | 5.51E-02 | 6.99E-07 | 2.94E-01  | 5.31E-02 | 7.23E-08 |
| X-11372               | -1.53E-01 | 6.38E-02 | 1.73E-02 | -6.71E-02 | 6.23E-02 | 2.82E-01 | -7.87E-02 | 6.04E-02 | 1.94E-01 |
| X-11381               | -1.88E-01 | 6.11E-02 | 2.28E-03 | -2.39E-01 | 5.84E-02 | 5.44E-05 | -1.97E-01 | 5.72E-02 | 6.81E-04 |
| X-11444               | 9.41E-03  | 6.15E-02 | 8.78E-01 | 5.38E-02  | 5.94E-02 | 3.66E-01 | -4.41E-02 | 5.77E-02 | 4.45E-01 |
| X-11470               | -3.88E-02 | 5.94E-02 | 5.14E-01 | -4.51E-02 | 5.75E-02 | 4.33E-01 | -8.48E-02 | 5.57E-02 | 1.29E-01 |
| X-11478               | -1.97E-01 | 6.49E-02 | 2.63E-03 | -1.05E-01 | 6.36E-02 | 1.01E-01 | -1.66E-01 | 6.13E-02 | 7.30E-03 |
| X-11483               | -1.01E-01 | 6.74E-02 | 1.37E-01 | -1.69E-01 | 6.47E-02 | 9.40E-03 | -7.23E-02 | 6.35E-02 | 2.56E-01 |
| X-11632               | -3.43E-02 | 6.36E-02 | 5.90E-01 | -4.18E-02 | 6.16E-02 | 4.98E-01 | -1.66E-02 | 5.98E-02 | 7.82E-01 |
| X-11787               | 2.16E-01  | 6.00E-02 | 3.69E-04 | 1.77E-01  | 5.85E-02 | 2.66E-03 | 1.23E-01  | 5.72E-02 | 3.28E-02 |
| X-11795               | -4.59E-02 | 6.42E-02 | 4.75E-01 | -1.65E-01 | 6.14E-02 | 7.58E-03 | 1.31E-02  | 6.04E-02 | 8.28E-01 |
| X-11843               | -1.68E-04 | 6.44E-02 | 9.98E-01 | -1.02E-02 | 6.23E-02 | 8.71E-01 | -1.14E-01 | 6.02E-02 | 5.93E-02 |
| X-11847               | 2.37E-01  | 5.99E-02 | 9.70E-05 | 6.13E-02  | 5.95E-02 | 3.04E-01 | 2.01E-01  | 5.66E-02 | 4.44E-04 |
| X-11849               | 2.19E-01  | 5.87E-02 | 2.35E-04 | 5.83E-02  | 5.81E-02 | 3.16E-01 | 2.13E-01  | 5.51E-02 | 1.34E-04 |
| X-11850               | 5.63E-02  | 6.42E-02 | 3.81E-01 | 4.16E-02  | 6.22E-02 | 5.03E-01 | -7.24E-02 | 6.03E-02 | 2.31E-01 |
| X-11852               | 8.16E-02  | 6.65E-02 | 2.21E-01 | 5.24E-02  | 6.45E-02 | 4.17E-01 | 4.31E-02  | 6.27E-02 | 4.92E-01 |
| X-11858               | 1.70E-01  | 6.34E-02 | 7.79E-03 | 4.44E-02  | 6.21E-02 | 4.75E-01 | 1.74E-01  | 5.95E-02 | 3.67E-03 |
| X-11880               | -1.95E-01 | 6.31E-02 | 2.17E-03 | -1.01E-01 | 6.18E-02 | 1.03E-01 | -1.28E-01 | 5.98E-02 | 3.37E-02 |
| X-11979               | 8.73E-02  | 6.20E-02 | 1.60E-01 | 1.50E-01  | 5.96E-02 | 1.24E-02 | 8.14E-03  | 5.85E-02 | 8.90E-01 |
| X-12007               | 1.11E-01  | 6.25E-02 | 7.71E-02 | 1.41E-01  | 6.02E-02 | 1.97E-02 | 5.57E-02  | 5.90E-02 | 3.46E-01 |
| X-12013               | 1.07E-02  | 6.53E-02 | 8.70E-01 | 2.86E-02  | 6.32E-02 | 6.51E-01 | -9.70E-02 | 6.11E-02 | 1.14E-01 |
| X-12026               | -2.74E-02 | 6.20E-02 | 6.59E-01 | 1.34E-01  | 5.95E-02 | 2.51E-02 | -9.67E-02 | 5.80E-02 | 9.68E-02 |
| X-12027               | 5.88E-02  | 6.62E-02 | 3.75E-01 | 1.34E-01  | 6.37E-02 | 3.64E-02 | -4.18E-02 | 6.23E-02 | 5.03E-01 |
| X-12100               | 5.16E-03  | 6.34E-02 | 9.35E-01 | 8.25E-02  | 6.12E-02 | 1.79E-01 | -3.97E-02 | 5.96E-02 | 5.06E-01 |
| X-12101               | -7.87E-02 | 6.13E-02 | 2.00E-01 | -6.46E-02 | 5.93E-02 | 2.77E-01 | 1.86E-02  | 5.78E-02 | 7.48E-01 |
| X-12104               | -7.45E-02 | 6.58E-02 | 2.59E-01 | 1.19E-01  | 6.35E-02 | 6.13E-02 | -8.93E-02 | 6.18E-02 | 1.50E-01 |
| X-12111               | 2.05E-01  | 6.66E-02 | 2.28E-03 | 2.48E-01  | 6.38E-02 | 1.24E-04 | 1.05E-01  | 6.33E-02 | 9.94E-02 |
| X-12193               | 5.45E-02  | 6.55E-02 | 4.06E-01 | 1.16E-01  | 6.31E-02 | 6.62E-02 | 7.45E-02  | 6.15E-02 | 2.27E-01 |
| X-12216               | -1.22E-02 | 6.42E-02 | 8.50E-01 | 4.88E-02  | 6.21E-02 | 4.33E-01 | -5.98E-02 | 6.03E-02 | 3.22E-01 |
| X-12221               | 1.24E-01  | 6.52E-02 | 5.84E-02 | 5.84E-02  | 6.34E-02 | 3.58E-01 | 2.92E-02  | 6.17E-02 | 6.36E-01 |
| X-12261               | 1.58E-02  | 6.42E-02 | 8.05E-01 | 3.11E-02  | 6.21E-02 | 6.16E-01 | -6.95E-02 | 6.02E-02 | 2.49E-01 |
| X-12262               | 3.16E-02  | 6.43E-02 | 6.23E-01 | 3.85E-02  | 6.22E-02 | 5.36E-01 | -3.87E-02 | 6.04E-02 | 5.22E-01 |
| X-12306               | 2.40E-01  | 5.95E-02 | 7.18E-05 | 1.64E-01  | 5.84E-02 | 5.29E-03 | 2.45E-01  | 5.56E-02 | 1.49E-05 |
| X-12407               | 2.70E-02  | 6.47E-02 | 6.77E-01 | 6.95E-02  | 6.25E-02 | 2.67E-01 | 1.83E-02  | 6.08E-02 | 7.63E-01 |
| X-12410               | 2.22E-01  | 6.24E-02 | 4.53E-04 | 1.79E-01  | 6.08E-02 | 3.48E-03 | 8.65E-02  | 5.98E-02 | 1.49E-01 |
| X-12411               | 7.93E-02  | 5.85E-02 | 1.76E-01 | 9.00E-02  | 5.65E-02 | 1.13E-01 | 6.66E-03  | 5.52E-02 | 9.04E-01 |
| X-12456               | -7.97E-02 | 5.69E-02 | 1.63E-01 | -9.83E-02 | 5.50E-02 | 7.49E-02 | -1.29E-01 | 5.32E-02 | 1.61E-02 |
| X-12544               | 6.46E-02  | 6.67E-02 | 3.34E-01 | 1.23E-01  | 6.43E-02 | 5.67E-02 | -4.64E-02 | 6.28E-02 | 4.60E-01 |
| X-12680               | 1.44E-01  | 6.31E-02 | 2.29E-02 | 3.30E-01  | 5.84E-02 | 3.82E-08 | 1.01E-01  | 5.96E-02 | 9.26E-02 |
| X-12701               | 1.27E-01  | 6.33E-02 | 4.53E-02 | 1.32E-01  | 6.12E-02 | 3.13E-02 | 9.50E-03  | 5.99E-02 | 8.74E-01 |
| X-12707               | -5.28E-02 | 6.38E-02 | 4.08E-01 | 7.62E-02  | 6.17E-02 | 2.18E-01 | -5.02E-02 | 6.00E-02 | 4.03E-01 |
| X-12714               | 1.14E-01  | 6.42E-02 | 7.75E-02 | 9.64E-02  | 6.22E-02 | 1.22E-01 | 4.95E-02  | 6.06E-02 | 4.14E-01 |
| X-12726               | 3.03E-01  | 6.06E-02 | 1.01E-06 | 2.52E-01  | 5.94E-02 | 2.99E-05 | 2.23E-01  | 5.80E-02 | 1.45E-04 |
| X-12729               | 3.54E-02  | 5.63E-02 | 5.30E-01 | 7.48E-02  | 5.43E-02 | 1.69E-01 | 7.27E-02  | 5.28E-02 | 1.70E-01 |
| X-12730               | 5.74E-02  | 6.38E-02 | 3.68E-01 | -1.76E-02 | 6.18E-02 | 7.76E-01 | -3.15E-02 | 6.00E-02 | 6.00E-01 |
| X-12731               | 1.29E-01  | 6.23E-02 | 3.91E-02 | 1.52E-01  | 6.01E-02 | 1.19E-02 | 2.32E-02  | 5.90E-02 | 6.95E-01 |
| X-12738               | 4.88E-02  | 6.49E-02 | 4.52E-01 | 4.60E-02  | 6.28E-02 | 4.65E-01 | 4.11E-02  | 6.10E-02 | 5.01E-01 |
| X-12740               | 7.91E-02  | 6.54E-02 | 2.27E-01 | 6.41E-02  | 6.34E-02 | 3.13E-01 | 1.09E-01  | 6.13E-02 | 7.67E-02 |
| X-12798               | -8.60E-02 | 6.00E-02 | 1.53E-01 | -1.10E-01 | 5.79E-02 | 5.75E-02 | -7.85E-02 | 5.64E-02 | 1.66E-01 |
| X-12812               | 1.48E-01  | 6.31E-02 | 1.97E-02 | 1.39E-01  | 6.12E-02 | 2.39E-02 | 1.12E-01  | 5.96E-02 | 6.05E-02 |
| X-12815               | 3.03E-02  | 6.35E-02 | 6.33E-01 | 1.28E-02  | 6.14E-02 | 8.35E-01 | 5.11E-02  | 5.96E-02 | 3.92E-01 |
| X-12816               | -9.63E-03 | 6.38E-02 | 8.80E-01 | -9.47E-02 | 6.15E-02 | 1.25E-01 | -1.54E-02 | 5.99E-02 | 7.98E-01 |
| X-12822               | -9.43E-02 | 6.34E-02 | 1.38E-01 | -6.89E-02 | 6.15E-02 | 2.63E-01 | -1.96E-02 | 5.99E-02 | 7.43E-01 |
| X-12830               | 2.63E-02  | 6.61E-02 | 6.91E-01 | -8.81E-02 | 6.37E-02 | 1.68E-01 | 3.32E-02  | 6.21E-02 | 5.94E-01 |
| X-12839               | -8.31E-02 | 6.05E-02 | 1.71E-01 | -9.05E-02 | 5.85E-02 | 1.23E-01 | -6.92E-02 | 5.69E-02 | 2.25E-01 |
| X-12844               | 9.92E-02  | 6.14E-02 | 1.07E-01 | 2.69E-02  | 5.96E-02 | 6.52E-01 | 1.42E-02  | 5.80E-02 | 8.06E-01 |
| X-12847               | -1.47E-02 | 6.63E-02 | 8.24E-01 | -3.38E-02 | 6.42E-02 | 5.99E-01 | 2.05E-02  | 6.23E-02 | 7.43E-01 |
| X-12849               | 3.55E-02  | 6.18E-02 | 5.66E-01 | -1.90E-02 | 5.98E-02 | 7.51E-01 | -7.05E-03 | 5.81E-02 | 9.04E-01 |
| X-12851               | -2.73E-03 | 6.39E-02 | 9.66E-01 | -9.38E-03 | 6.19E-02 | 8.80E-01 | -3.80E-03 | 6.01E-02 | 9.50E-01 |
| X-12906               | 1.07E-01  | 6.27E-02 | 8.90E-02 | 1.55E-01  | 6.03E-02 | 1.05E-02 | 7.37E-02  | 5.91E-02 | 2.13E-01 |
| X-13431               | -9.14E-02 | 6.13E-02 | 1.37E-01 | -3.99E-02 | 5.96E-02 | 5.03E-01 | -6.56E-02 | 5.78E-02 | 2.57E-01 |
| X-13507               | 1.42E-01  | 6.25E-02 | 2.38E-02 | 1.06E-01  | 6.07E-02 | 8.05E-02 | 1.39E-01  | 5.87E-02 | 1.89E-02 |
| X-13553               | -2.38E-02 | 5.93E-02 | 6.88E-01 | 8.26E-02  | 5.72E-02 | 1.50E-01 | -4.34E-02 | 5.57E-02 | 4.37E-01 |
| X-13658               | 2.89E-02  | 6.42E-02 | 6.53E-01 | 8.39E-02  | 6.19E-02 | 1.76E-01 | 4.72E-02  | 6.03E-02 | 4.34E-01 |
| X-13695               | 1.08E-01  | 6.68E-02 | 1.06E-01 | 4.05E-02  | 6.49E-02 | 5.33E-01 | 3.94E-02  | 6.30E-02 | 5.32E-01 |
| X-13723               | 1.23E-01  | 6.39E-02 | 5.55E-02 | 1.19E-01  | 6.19E-02 | 5.58E-02 | 1.08E-01  | 6.02E-02 | 7.26E-02 |
| X-13726               | 2.04E-01  | 6.61E-02 | 2.28E-03 | 1.73E-01  | 6.43E-02 | 7.47E-03 | 9.43E-02  | 6.30E-02 | 1.35E-01 |
| X-13728               | -5.53E-02 | 6.27E-02 | 3.78E-01 | 5.93E-02  | 6.07E-02 | 3.29E-01 | -2.41E-02 | 5.90E-02 | 6.83E-01 |
| X-13729               | -6.01E-03 | 6.50E-02 | 9.26E-01 | 1.05E-01  | 6.26E-02 | 9.48E-02 | -4.95E-02 | 6.11E-02 | 4.18E-01 |
| X-13844               | 1.28E-01  | 5.94E-02 | 3.16E-02 | 1.73E-01  | 5.70E-02 | 2.64E-03 | 5.03E-02  | 5.62E-02 | 3.71E-01 |
| X-13846               | 9.44E-02  | 6.66E-02 | 1.57E-01 | 3.93E-02  | 6.46E-02 | 5.44E-01 | 3.54E-02  | 6.28E-02 | 5.74E-01 |
| X-13866               | 3.41E-02  | 6.45E-02 | 5.97E-01 | -3.74E-02 | 6.24E-02 | 5.49E-01 | 9.38E-02  | 6.04E-02 | 1.22E-01 |
| X-14056               | -2.46E-01 | 5.67E-02 | 2.01E-05 | -2.00E-01 | 5.54E-02 | 3.74E-04 | -1.64E-01 | 5.42E-02 | 2.67E-03 |
| X-14939               | -1.12E-01 | 6.28E-02 | 7.52E-02 | -9.37E-02 | 6.09E-02 | 1.25E-01 | -5.01E-02 | 5.93E-02 | 3.99E-01 |
| X-15486               | -2.28E-01 | 6.26E-02 | 3.28E-04 | -1.40E-01 | 6.15E-02 | 2.34E-02 | -1.84E-01 | 5.93E-02 | 2.07E-03 |
| X-15503               | 2.17E-02  | 5.87E-02 | 7.12E-01 | 1.30E-01  | 5.63E-02 | 2.20E-02 | -4.64E-02 | 5.51E-02 | 4.01E-01 |

Supplementary Table 4: Parameter estimates for metabolome-wide association studies for diet-metabolite associations for each of: HEI-15, DASH and AMED diet, controlling for BMI

|         |           |          |          |           |          |          |           |          |          |
|---------|-----------|----------|----------|-----------|----------|----------|-----------|----------|----------|
| X-15728 | 1.14E-01  | 6.43E-02 | 7.78E-02 | 3.60E-02  | 6.25E-02 | 5.66E-01 | 3.01E-02  | 6.07E-02 | 6.21E-01 |
| X-16087 | -1.15E-01 | 6.07E-02 | 6.02E-02 | -1.12E-01 | 5.88E-02 | 5.68E-02 | -5.38E-02 | 5.74E-02 | 3.49E-01 |
| X-16124 | 5.59E-02  | 6.51E-02 | 3.91E-01 | -3.31E-02 | 6.31E-02 | 6.00E-01 | 4.26E-02  | 6.13E-02 | 4.87E-01 |
| X-16397 | -1.14E-01 | 6.41E-02 | 7.59E-02 | -8.59E-02 | 6.21E-02 | 1.68E-01 | -3.52E-02 | 6.05E-02 | 5.62E-01 |
| X-16576 | 2.10E-02  | 6.32E-02 | 7.40E-01 | 7.09E-03  | 6.12E-02 | 9.08E-01 | -2.46E-03 | 5.94E-02 | 9.67E-01 |
| X-16580 | -1.47E-01 | 6.21E-02 | 1.88E-02 | -8.79E-02 | 6.04E-02 | 1.47E-01 | -8.48E-02 | 5.87E-02 | 1.50E-01 |
| X-16649 | 7.50E-02  | 6.62E-02 | 2.58E-01 | 1.15E-01  | 6.39E-02 | 7.40E-02 | 2.82E-02  | 6.24E-02 | 6.52E-01 |
| X-16935 | -2.17E-01 | 5.76E-02 | 1.98E-04 | -1.38E-01 | 5.65E-02 | 1.54E-02 | -1.03E-01 | 5.52E-02 | 6.42E-02 |
| X-16964 | -1.22E-01 | 6.27E-02 | 5.34E-02 | -2.24E-01 | 5.96E-02 | 2.02E-04 | -1.09E-01 | 5.90E-02 | 6.52E-02 |
| X-17010 | -2.28E-02 | 6.15E-02 | 7.11E-01 | -8.75E-02 | 5.93E-02 | 1.42E-01 | -9.51E-03 | 5.79E-02 | 8.70E-01 |
| X-17146 | -6.77E-04 | 6.57E-02 | 9.92E-01 | -8.09E-02 | 6.34E-02 | 2.03E-01 | -5.67E-03 | 6.17E-02 | 9.27E-01 |
| X-17162 | -1.60E-02 | 6.28E-02 | 7.99E-01 | -3.84E-02 | 6.08E-02 | 5.28E-01 | -4.26E-02 | 5.90E-02 | 4.71E-01 |
| X-17301 | -2.09E-02 | 4.75E-02 | 6.60E-01 | -6.50E-02 | 4.59E-02 | 1.58E-01 | -1.86E-02 | 4.47E-02 | 6.77E-01 |
| X-17306 | -8.75E-03 | 5.94E-02 | 8.83E-01 | -1.03E-01 | 5.71E-02 | 7.34E-02 | 5.87E-03  | 5.58E-02 | 9.16E-01 |
| X-17325 | 1.13E-01  | 6.39E-02 | 7.72E-02 | 1.66E-01  | 6.14E-02 | 7.39E-03 | 7.20E-02  | 6.03E-02 | 2.33E-01 |
| X-17335 | -6.31E-02 | 6.11E-02 | 3.03E-01 | -9.61E-02 | 5.90E-02 | 1.04E-01 | -5.98E-02 | 5.74E-02 | 2.99E-01 |
| X-17346 | -1.29E-01 | 6.42E-02 | 4.49E-02 | -1.41E-02 | 6.25E-02 | 8.22E-01 | -1.38E-01 | 6.02E-02 | 2.31E-02 |
| X-17348 | 9.44E-02  | 6.43E-02 | 1.44E-01 | -5.24E-04 | 6.25E-02 | 9.93E-01 | 1.00E-01  | 6.04E-02 | 9.80E-02 |
| X-17351 | 2.62E-01  | 5.83E-02 | 9.89E-06 | 2.54E-01  | 5.64E-02 | 9.53E-06 | 1.85E-01  | 5.56E-02 | 9.91E-04 |
| X-17353 | -1.29E-02 | 6.19E-02 | 8.36E-01 | 3.14E-02  | 5.99E-02 | 6.00E-01 | 1.28E-03  | 5.82E-02 | 9.83E-01 |
| X-17354 | 2.34E-01  | 6.17E-02 | 1.76E-04 | 1.67E-01  | 6.04E-02 | 5.93E-03 | 1.48E-01  | 5.88E-02 | 1.22E-02 |
| X-17357 | 2.29E-02  | 6.13E-02 | 7.09E-01 | -1.79E-03 | 5.93E-02 | 9.76E-01 | -2.23E-02 | 5.76E-02 | 6.99E-01 |
| X-17365 | 2.96E-02  | 6.47E-02 | 6.47E-01 | -2.58E-02 | 6.26E-02 | 6.80E-01 | 1.36E-01  | 6.03E-02 | 2.53E-02 |
| X-17367 | 7.66E-02  | 6.46E-02 | 2.37E-01 | 1.52E-01  | 6.20E-02 | 1.50E-02 | 4.33E-02  | 6.08E-02 | 4.77E-01 |
| X-17438 | 2.09E-01  | 6.25E-02 | 9.14E-04 | 1.47E-01  | 6.11E-02 | 1.69E-02 | 1.11E-01  | 5.95E-02 | 6.45E-02 |
| X-17612 | 5.46E-02  | 6.52E-02 | 4.04E-01 | 3.53E-02  | 6.32E-02 | 5.77E-01 | -3.37E-02 | 6.14E-02 | 5.83E-01 |
| X-17653 | -1.13E-01 | 6.44E-02 | 7.96E-02 | -7.94E-02 | 6.25E-02 | 2.04E-01 | -1.08E-01 | 6.05E-02 | 7.41E-02 |
| X-17654 | 1.54E-02  | 6.58E-02 | 8.15E-01 | 9.27E-02  | 6.35E-02 | 1.45E-01 | 1.69E-02  | 6.19E-02 | 7.85E-01 |
| X-17655 | 3.53E-02  | 6.55E-02 | 5.90E-01 | -3.61E-02 | 6.34E-02 | 5.70E-01 | 2.68E-02  | 6.16E-02 | 6.63E-01 |
| X-17676 | 5.89E-02  | 6.30E-02 | 3.51E-01 | 1.72E-01  | 6.01E-02 | 4.51E-03 | 2.93E-03  | 5.93E-02 | 9.61E-01 |
| X-17682 | -1.05E-01 | 6.12E-02 | 8.88E-02 | -2.20E-02 | 5.96E-02 | 7.13E-01 | -9.18E-02 | 5.76E-02 | 1.12E-01 |
| X-17685 | 9.06E-02  | 6.39E-02 | 1.57E-01 | 5.70E-02  | 6.20E-02 | 3.58E-01 | 1.61E-01  | 5.95E-02 | 7.12E-03 |
| X-17686 | 1.22E-01  | 6.66E-02 | 6.72E-02 | 7.98E-02  | 6.47E-02 | 2.18E-01 | 6.31E-02  | 6.29E-02 | 3.17E-01 |
| X-17690 | 7.98E-02  | 6.61E-02 | 2.29E-01 | -2.15E-02 | 6.41E-02 | 7.37E-01 | 7.89E-02  | 6.21E-02 | 2.05E-01 |
| X-17692 | -5.94E-02 | 6.61E-02 | 3.70E-01 | -7.76E-02 | 6.39E-02 | 2.26E-01 | 2.53E-02  | 6.22E-02 | 6.85E-01 |
| X-17735 | 1.14E-02  | 6.42E-02 | 8.59E-01 | 9.25E-02  | 6.19E-02 | 1.36E-01 | -4.84E-03 | 6.03E-02 | 9.36E-01 |
| X-17761 | -1.06E-01 | 6.29E-02 | 9.40E-02 | -2.30E-01 | 5.97E-02 | 1.40E-04 | -7.97E-02 | 5.93E-02 | 1.80E-01 |
| X-17765 | 7.62E-02  | 6.10E-02 | 2.13E-01 | 3.75E-02  | 5.92E-02 | 5.27E-01 | -9.84E-03 | 5.75E-02 | 8.64E-01 |
| X-18240 | 5.84E-03  | 6.37E-02 | 9.27E-01 | -4.23E-02 | 6.16E-02 | 4.93E-01 | -5.76E-02 | 5.98E-02 | 3.36E-01 |
| X-18345 | -1.89E-02 | 6.58E-02 | 7.75E-01 | 1.03E-01  | 6.34E-02 | 1.05E-01 | 4.35E-02  | 6.18E-02 | 4.82E-01 |
| X-18779 | -2.54E-02 | 6.46E-02 | 6.94E-01 | -5.90E-02 | 6.24E-02 | 3.45E-01 | -1.27E-01 | 6.02E-02 | 3.52E-02 |
| X-18838 | -4.80E-02 | 5.54E-02 | 3.86E-01 | -8.18E-03 | 5.36E-02 | 8.79E-01 | 1.07E-02  | 5.21E-02 | 8.38E-01 |
| X-18886 | -1.85E-01 | 6.21E-02 | 3.19E-03 | -2.17E-01 | 5.96E-02 | 3.25E-04 | -1.54E-01 | 5.86E-02 | 9.04E-03 |
| X-18887 | -1.32E-01 | 6.27E-02 | 3.69E-02 | -2.23E-02 | 6.12E-02 | 7.15E-01 | -4.23E-02 | 5.94E-02 | 4.77E-01 |
| X-18888 | 4.08E-02  | 6.32E-02 | 5.19E-01 | 5.92E-02  | 6.11E-02 | 3.33E-01 | 2.64E-02  | 5.94E-02 | 6.57E-01 |
| X-18899 | -8.76E-03 | 6.43E-02 | 8.92E-01 | -2.05E-02 | 6.22E-02 | 7.42E-01 | 2.30E-02  | 6.04E-02 | 7.04E-01 |
| X-18901 | 1.43E-01  | 5.65E-02 | 1.19E-02 | 8.09E-02  | 5.51E-02 | 1.43E-01 | 1.20E-01  | 5.32E-02 | 2.46E-02 |
| X-18913 | -1.30E-02 | 6.46E-02 | 8.40E-01 | 6.17E-02  | 6.24E-02 | 3.24E-01 | 1.47E-03  | 6.07E-02 | 9.81E-01 |
| X-18921 | -1.87E-01 | 6.46E-02 | 4.05E-03 | -1.70E-01 | 6.26E-02 | 7.16E-03 | -1.54E-01 | 6.09E-02 | 1.21E-02 |
| X-18922 | -6.62E-02 | 6.55E-02 | 3.13E-01 | -1.49E-01 | 6.29E-02 | 1.86E-02 | 3.51E-02  | 6.17E-02 | 5.70E-01 |
| X-18935 | 1.03E-01  | 6.41E-02 | 1.11E-01 | 6.49E-02  | 6.22E-02 | 2.98E-01 | 6.70E-02  | 6.04E-02 | 2.69E-01 |
| X-19141 | 5.08E-02  | 6.20E-02 | 4.13E-01 | 9.95E-02  | 5.98E-02 | 9.75E-02 | 3.31E-02  | 5.84E-02 | 5.71E-01 |
| X-19183 | 5.31E-02  | 6.88E-02 | 4.41E-01 | -2.56E-02 | 6.67E-02 | 7.01E-01 | 1.14E-01  | 6.44E-02 | 7.81E-02 |
| X-19299 | 6.98E-02  | 6.50E-02 | 2.84E-01 | 5.54E-02  | 6.30E-02 | 3.80E-01 | 6.41E-03  | 6.12E-02 | 9.17E-01 |
| X-19438 | -1.55E-02 | 6.59E-02 | 8.14E-01 | -3.26E-02 | 6.38E-02 | 6.09E-01 | -3.50E-02 | 6.20E-02 | 5.73E-01 |
| X-21258 | 6.69E-02  | 6.54E-02 | 3.08E-01 | 5.11E-02  | 6.34E-02 | 4.21E-01 | 6.56E-02  | 6.15E-02 | 2.87E-01 |
| X-21286 | -3.24E-02 | 6.40E-02 | 6.13E-01 | 2.32E-02  | 6.20E-02 | 7.09E-01 | -2.67E-02 | 6.02E-02 | 6.58E-01 |
| X-21310 | -1.15E-01 | 6.41E-02 | 7.30E-02 | -9.28E-02 | 6.22E-02 | 1.37E-01 | -1.33E-01 | 6.01E-02 | 2.73E-02 |
| X-21312 | 6.91E-03  | 6.58E-02 | 9.16E-01 | -1.00E-02 | 6.37E-02 | 8.75E-01 | 3.41E-02  | 6.18E-02 | 5.82E-01 |
| X-21315 | -4.02E-02 | 5.40E-02 | 4.57E-01 | -1.93E-02 | 5.23E-02 | 7.13E-01 | -4.35E-02 | 5.07E-02 | 3.92E-01 |
| X-21319 | -1.66E-01 | 6.48E-02 | 1.08E-02 | -1.26E-01 | 6.30E-02 | 4.63E-02 | -1.39E-01 | 6.11E-02 | 2.41E-02 |
| X-21339 | -2.31E-01 | 6.19E-02 | 2.33E-04 | -1.66E-01 | 6.06E-02 | 6.48E-03 | -1.46E-01 | 5.90E-02 | 1.40E-02 |
| X-21351 | -5.31E-03 | 6.58E-02 | 9.36E-01 | -1.39E-02 | 6.37E-02 | 8.27E-01 | -5.40E-03 | 6.19E-02 | 9.31E-01 |
| X-21353 | -8.54E-02 | 6.40E-02 | 1.83E-01 | -3.89E-02 | 6.21E-02 | 5.31E-01 | -5.77E-02 | 6.03E-02 | 3.39E-01 |
| X-21364 | -1.60E-01 | 5.85E-02 | 6.50E-03 | -6.40E-02 | 5.72E-02 | 2.64E-01 | -1.53E-01 | 5.49E-02 | 5.78E-03 |
| X-21383 | -1.09E-01 | 6.23E-02 | 8.02E-02 | -1.64E-01 | 5.98E-02 | 6.66E-03 | -7.78E-02 | 5.87E-02 | 1.86E-01 |
| X-21441 | -1.57E-01 | 6.09E-02 | 1.05E-02 | -1.12E-01 | 5.92E-02 | 5.95E-02 | -1.48E-01 | 5.72E-02 | 1.01E-02 |
| X-21442 | 3.15E-02  | 6.18E-02 | 6.11E-01 | -7.84E-02 | 5.97E-02 | 1.90E-01 | -1.81E-02 | 5.81E-02 | 7.56E-01 |
| X-21467 | -8.68E-02 | 6.34E-02 | 1.72E-01 | 3.58E-02  | 6.15E-02 | 5.61E-01 | -3.63E-02 | 5.97E-02 | 5.43E-01 |
| X-21470 | -9.06E-02 | 6.14E-02 | 1.41E-01 | -1.52E-01 | 5.89E-02 | 1.03E-02 | -1.11E-01 | 5.75E-02 | 5.40E-02 |
| X-21471 | -6.59E-02 | 6.01E-02 | 2.74E-01 | 4.01E-02  | 5.83E-02 | 4.92E-01 | -5.84E-02 | 5.65E-02 | 3.02E-01 |
| X-21607 | 1.64E-03  | 6.51E-02 | 9.80E-01 | -1.97E-02 | 6.30E-02 | 7.54E-01 | -5.52E-04 | 6.12E-02 | 9.93E-01 |
| X-21628 | 1.59E-01  | 6.88E-02 | 2.12E-02 | 1.31E-01  | 6.68E-02 | 5.12E-02 | 8.77E-02  | 6.51E-02 | 1.79E-01 |
| X-21661 | 1.46E-01  | 6.42E-02 | 2.41E-02 | 1.49E-02  | 6.27E-02 | 8.13E-01 | 1.54E-01  | 6.03E-02 | 1.12E-02 |
| X-21733 | 2.15E-01  | 6.07E-02 | 4.57E-04 | 2.38E-01  | 5.83E-02 | 5.69E-05 | 7.36E-02  | 5.81E-02 | 2.07E-01 |
| X-21736 | -2.54E-01 | 6.10E-02 | 4.33E-05 | -3.02E-01 | 5.81E-02 | 3.95E-07 | -1.58E-01 | 5.84E-02 | 7.29E-03 |
| X-21740 | -1.69E-01 | 6.37E-02 | 8.62E-03 | -1.70E-01 | 6.16E-02 | 6.07E-03 | -8.47E-02 | 6.04E-02 | 1.62E-01 |
| X-21742 | 2.74E-02  | 5.94E-02 | 6.45E-01 | 1.54E-02  | 5.75E-02 | 7.89E-01 | -4.52E-02 | 5.58E-02 | 4.19E-01 |
| X-21752 | 2.81E-01  | 5.97E-02 | 4.02E-06 | 3.92E-01  | 5.52E-02 | 9.99E-12 | 8.97E-02  | 5.81E-02 | 1.24E-01 |
| X-21788 | -1.19E-01 | 6.22E-02 | 5.71E-02 | -4.54E-02 | 6.05E-02 | 4.54E-01 | -8.80E-02 | 5.86E-02 | 1.34E-01 |
| X-21796 | -6.99E-02 | 6.00E-02 | 2.45E-01 | -4.85E-02 | 5.81E-02 | 4.05E-01 | -3.27E-02 | 5.65E-02 | 5.63E-01 |
| X-21803 | 5.49E-03  | 6.52E-02 | 9.33E-01 | 1.54E-03  | 6.31E-02 | 9.81E-01 | 5.45E-03  | 6.13E-02 | 9.29E-01 |

Supplementary Table 4: Parameter estimates for metabolome-wide association studies for diet-metabolite associations for each of: HEI-15, DASH and AMED diet, controlling for BMI

|         |           |          |          |           |          |          |           |          |          |
|---------|-----------|----------|----------|-----------|----------|----------|-----------|----------|----------|
| X-21807 | 1.67E-01  | 6.45E-02 | 1.03E-02 | 1.64E-01  | 6.24E-02 | 8.99E-03 | 9.82E-02  | 6.11E-02 | 1.09E-01 |
| X-21815 | -4.24E-02 | 6.15E-02 | 4.91E-01 | -1.11E-01 | 5.92E-02 | 6.12E-02 | -7.86E-02 | 5.77E-02 | 1.74E-01 |
| X-21816 | -6.58E-02 | 6.31E-02 | 2.98E-01 | -1.54E-02 | 6.11E-02 | 8.01E-01 | -6.38E-02 | 5.93E-02 | 2.83E-01 |
| X-21821 | 2.38E-01  | 5.84E-02 | 5.77E-05 | 2.28E-01  | 5.65E-02 | 7.33E-05 | 1.85E-01  | 5.54E-02 | 9.72E-04 |
| X-21830 | 6.84E-02  | 6.35E-02 | 2.82E-01 | 6.01E-02  | 6.15E-02 | 3.29E-01 | -2.43E-02 | 5.98E-02 | 6.85E-01 |
| X-21831 | 9.96E-02  | 6.20E-02 | 1.09E-01 | 1.12E-01  | 5.99E-02 | 6.16E-02 | 2.62E-02  | 5.85E-02 | 6.54E-01 |
| X-21834 | 1.20E-01  | 6.50E-02 | 6.62E-02 | 5.84E-02  | 6.32E-02 | 3.56E-01 | 1.08E-01  | 6.11E-02 | 7.85E-02 |
| X-21838 | -8.16E-02 | 6.39E-02 | 2.02E-01 | 2.15E-02  | 6.20E-02 | 7.29E-01 | -4.63E-02 | 6.02E-02 | 4.42E-01 |
| X-21839 | 5.30E-02  | 6.71E-02 | 4.30E-01 | -5.49E-02 | 6.49E-02 | 3.98E-01 | 3.21E-02  | 6.31E-02 | 6.11E-01 |
| X-21840 | 8.85E-02  | 6.42E-02 | 1.69E-01 | 6.22E-02  | 6.23E-02 | 3.19E-01 | 7.60E-02  | 6.04E-02 | 2.09E-01 |
| X-21842 | 2.63E-01  | 6.05E-02 | 1.89E-05 | 2.60E-01  | 5.85E-02 | 1.28E-05 | 1.87E-01  | 5.77E-02 | 1.35E-03 |
| X-21845 | -2.65E-02 | 6.63E-02 | 6.90E-01 | -1.68E-01 | 6.34E-02 | 8.53E-03 | 8.12E-03  | 6.23E-02 | 8.96E-01 |
| X-21851 | -7.91E-02 | 6.48E-02 | 2.23E-01 | -4.44E-02 | 6.28E-02 | 4.80E-01 | -9.89E-02 | 6.08E-02 | 1.05E-01 |
| X-22162 | 1.47E-01  | 6.06E-02 | 1.58E-02 | 1.14E-01  | 5.89E-02 | 5.46E-02 | 1.55E-01  | 5.68E-02 | 6.74E-03 |
| X-22509 | 2.03E-01  | 6.22E-02 | 1.27E-03 | 9.19E-02  | 6.11E-02 | 1.34E-01 | 1.43E-01  | 5.90E-02 | 1.57E-02 |
| X-22771 | -1.02E-01 | 6.35E-02 | 1.10E-01 | -2.26E-01 | 6.03E-02 | 2.10E-04 | -9.47E-02 | 5.97E-02 | 1.14E-01 |
| X-22776 | -1.65E-02 | 6.48E-02 | 7.99E-01 | -7.54E-02 | 6.26E-02 | 2.29E-01 | -1.44E-02 | 6.09E-02 | 8.14E-01 |
| X-22834 | -3.57E-02 | 6.44E-02 | 5.80E-01 | -6.23E-03 | 6.24E-02 | 9.20E-01 | -1.13E-01 | 6.02E-02 | 6.25E-02 |
| X-23276 | 1.35E-03  | 6.58E-02 | 9.84E-01 | -4.04E-02 | 6.36E-02 | 5.25E-01 | -2.51E-02 | 6.18E-02 | 6.85E-01 |
| X-23481 | -5.90E-03 | 6.46E-02 | 9.27E-01 | 2.12E-02  | 6.25E-02 | 7.34E-01 | -5.70E-02 | 6.06E-02 | 3.48E-01 |
| X-23587 | -2.08E-02 | 6.25E-02 | 7.39E-01 | -1.71E-01 | 5.96E-02 | 4.41E-03 | 6.11E-02  | 5.87E-02 | 2.98E-01 |
| X-23593 | 2.43E-02  | 6.42E-02 | 7.05E-01 | 8.91E-02  | 6.19E-02 | 1.51E-01 | 3.73E-02  | 6.03E-02 | 5.37E-01 |
| X-23636 | -4.19E-02 | 6.49E-02 | 5.19E-01 | -1.00E-01 | 6.26E-02 | 1.10E-01 | -1.12E-01 | 6.07E-02 | 6.70E-02 |
| X-23639 | 1.75E-02  | 6.01E-02 | 7.71E-01 | -1.92E-02 | 5.81E-02 | 7.42E-01 | 5.61E-02  | 5.64E-02 | 2.42E-01 |
| X-23641 | 3.77E-02  | 6.33E-02 | 5.52E-01 | 3.70E-03  | 6.13E-02 | 9.52E-01 | -4.43E-02 | 5.95E-02 | 4.57E-01 |
| X-23644 | 2.00E-01  | 6.37E-02 | 1.88E-03 | 2.49E-01  | 6.09E-02 | 5.63E-05 | 1.42E-01  | 6.04E-02 | 1.93E-02 |
| X-23654 | 1.05E-01  | 6.25E-02 | 9.41E-02 | 1.13E-01  | 6.04E-02 | 6.30E-02 | 6.23E-02  | 5.89E-02 | 2.91E-01 |
| X-23659 | 1.81E-01  | 5.98E-02 | 2.68E-03 | 2.23E-01  | 5.73E-02 | 1.23E-04 | 1.29E-01  | 5.66E-02 | 2.37E-02 |
| X-23678 | -1.03E-01 | 6.25E-02 | 1.01E-01 | -7.50E-02 | 6.06E-02 | 2.17E-01 | -6.95E-02 | 5.89E-02 | 2.39E-01 |
| X-23680 | -1.37E-01 | 6.44E-02 | 3.38E-02 | -6.95E-02 | 6.27E-02 | 2.68E-01 | -8.11E-02 | 6.08E-02 | 1.83E-01 |
| X-23739 | -7.35E-04 | 6.32E-02 | 9.91E-01 | -2.82E-02 | 6.11E-02 | 6.45E-01 | 4.58E-03  | 5.94E-02 | 9.39E-01 |
| X-23767 | -1.78E-01 | 6.17E-02 | 4.20E-03 | -8.77E-02 | 6.04E-02 | 1.48E-01 | -2.74E-02 | 5.88E-02 | 6.41E-01 |
| X-23780 | 1.10E-01  | 6.54E-02 | 9.31E-02 | 5.56E-02  | 6.35E-02 | 3.82E-01 | 1.17E-01  | 6.14E-02 | 5.84E-02 |
| X-23782 | 3.59E-02  | 5.87E-02 | 5.41E-01 | -5.82E-03 | 5.68E-02 | 9.19E-01 | 1.39E-01  | 5.46E-02 | 1.12E-02 |
| X-23787 | -1.98E-01 | 6.13E-02 | 1.38E-03 | -1.70E-01 | 5.96E-02 | 4.67E-03 | -1.47E-01 | 5.80E-02 | 1.16E-02 |
| X-23890 | 1.12E-01  | 6.38E-02 | 8.14E-02 | 1.39E-01  | 6.16E-02 | 2.42E-02 | 3.01E-02  | 6.03E-02 | 6.18E-01 |
| X-23974 | 4.28E-03  | 6.47E-02 | 9.47E-01 | 3.50E-02  | 6.26E-02 | 5.76E-01 | 6.57E-02  | 6.07E-02 | 2.80E-01 |
| X-23997 | 5.43E-02  | 6.49E-02 | 4.03E-01 | 5.72E-02  | 6.28E-02 | 3.63E-01 | 6.09E-03  | 6.11E-02 | 9.21E-01 |
| X-24295 | -5.72E-02 | 6.22E-02 | 3.59E-01 | -3.01E-02 | 6.03E-02 | 6.19E-01 | -3.58E-02 | 5.86E-02 | 5.41E-01 |
| X-24306 | 1.58E-02  | 6.20E-02 | 7.99E-01 | -5.53E-02 | 5.99E-02 | 3.57E-01 | -4.62E-02 | 5.82E-02 | 4.28E-01 |
| X-24307 | -2.36E-02 | 6.33E-02 | 7.10E-01 | -3.64E-02 | 6.12E-02 | 5.53E-01 | -8.83E-02 | 5.92E-02 | 1.37E-01 |
| X-24309 | -1.15E-01 | 6.05E-02 | 5.79E-02 | -6.04E-02 | 5.88E-02 | 3.06E-01 | -1.29E-01 | 5.67E-02 | 2.34E-02 |
| X-24328 | -7.19E-02 | 5.25E-02 | 1.72E-01 | -5.82E-02 | 5.08E-02 | 2.53E-01 | -1.13E-01 | 4.90E-02 | 2.17E-02 |
| X-24334 | -3.45E-02 | 5.57E-02 | 5.37E-01 | 2.29E-02  | 5.39E-02 | 6.72E-01 | -9.88E-02 | 5.21E-02 | 5.88E-02 |
| X-24337 | -9.58E-02 | 5.69E-02 | 9.34E-02 | -1.67E-02 | 5.54E-02 | 7.63E-01 | -1.37E-01 | 5.32E-02 | 1.04E-02 |
| X-24338 | 5.58E-02  | 5.89E-02 | 3.44E-01 | 5.82E-02  | 5.70E-02 | 3.08E-01 | 5.64E-03  | 5.54E-02 | 9.19E-01 |
| X-24344 | -3.90E-02 | 5.86E-02 | 5.06E-01 | -7.56E-02 | 5.66E-02 | 1.83E-01 | -2.75E-02 | 5.51E-02 | 6.18E-01 |
| X-24352 | 1.80E-01  | 6.66E-02 | 7.24E-03 | 4.72E-02  | 6.52E-02 | 4.70E-01 | 7.24E-02  | 6.33E-02 | 2.54E-01 |
| X-24414 | -1.68E-03 | 5.62E-02 | 9.76E-01 | -1.77E-02 | 5.44E-02 | 7.44E-01 | -3.77E-02 | 5.28E-02 | 4.76E-01 |
| X-24418 | 8.97E-02  | 6.41E-02 | 1.63E-01 | -2.51E-02 | 6.22E-02 | 6.87E-01 | 3.83E-02  | 6.04E-02 | 5.26E-01 |
| X-24456 | -3.28E-02 | 6.41E-02 | 6.09E-01 | -5.61E-03 | 6.21E-02 | 9.28E-01 | 5.06E-02  | 6.02E-02 | 4.01E-01 |
| X-24475 | 2.13E-01  | 6.08E-02 | 5.29E-04 | 1.88E-01  | 5.91E-02 | 1.62E-03 | 1.48E-01  | 5.77E-02 | 1.11E-02 |
| X-24494 | 7.67E-02  | 6.47E-02 | 2.37E-01 | -8.87E-03 | 6.28E-02 | 8.88E-01 | 5.52E-02  | 6.09E-02 | 3.65E-01 |
| X-24541 | 1.43E-01  | 6.38E-02 | 2.53E-02 | 7.05E-02  | 6.22E-02 | 2.58E-01 | 1.54E-01  | 5.98E-02 | 1.08E-02 |
| X-24543 | -1.44E-01 | 6.16E-02 | 2.04E-02 | -1.08E-01 | 5.99E-02 | 7.30E-02 | -1.26E-01 | 5.80E-02 | 3.11E-02 |
| X-24544 | -1.79E-01 | 5.80E-02 | 2.24E-03 | -1.14E-01 | 5.67E-02 | 4.50E-02 | -2.05E-01 | 5.41E-02 | 1.93E-04 |
| X-24545 | 1.20E-01  | 6.60E-02 | 7.05E-02 | 3.57E-02  | 6.42E-02 | 5.78E-01 | 4.25E-02  | 6.23E-02 | 4.96E-01 |
| X-24546 | -1.20E-01 | 6.05E-02 | 4.85E-02 | -9.97E-02 | 5.87E-02 | 9.06E-02 | -1.72E-01 | 5.64E-02 | 2.48E-03 |
| X-24556 | -7.58E-03 | 6.23E-02 | 9.03E-01 | 7.73E-02  | 6.01E-02 | 2.00E-01 | 8.01E-02  | 5.84E-02 | 1.71E-01 |
| X-24565 | -8.18E-02 | 6.73E-02 | 2.25E-01 | 6.19E-02  | 6.52E-02 | 3.44E-01 | -9.11E-02 | 6.32E-02 | 1.51E-01 |
| X-24571 | -3.80E-02 | 6.63E-02 | 5.67E-01 | -6.59E-02 | 6.41E-02 | 3.05E-01 | -1.44E-02 | 6.23E-02 | 8.17E-01 |
| X-24576 | 6.23E-02  | 6.84E-02 | 3.63E-01 | 6.66E-02  | 6.62E-02 | 3.15E-01 | 1.16E-02  | 6.44E-02 | 8.57E-01 |
| X-24588 | -1.42E-01 | 5.68E-02 | 1.28E-02 | -1.39E-01 | 5.50E-02 | 1.23E-02 | -8.77E-02 | 5.38E-02 | 1.04E-01 |
| X-24657 | 7.06E-02  | 6.75E-02 | 2.96E-01 | 9.81E-02  | 6.52E-02 | 1.33E-01 | 1.35E-02  | 6.35E-02 | 8.32E-01 |
| X-24736 | 2.61E-01  | 6.40E-02 | 5.71E-05 | 1.72E-01  | 6.29E-02 | 6.51E-03 | 2.10E-01  | 6.06E-02 | 6.13E-04 |
| X-24747 | -9.05E-03 | 6.17E-02 | 8.84E-01 | 8.02E-02  | 5.95E-02 | 1.79E-01 | 1.28E-02  | 5.80E-02 | 8.25E-01 |
| X-24748 | 7.57E-02  | 6.65E-02 | 2.56E-01 | 5.72E-02  | 6.44E-02 | 3.76E-01 | 8.39E-02  | 6.25E-02 | 1.81E-01 |
| X-24757 | 1.75E-01  | 6.52E-02 | 7.73E-03 | 2.11E-01  | 6.26E-02 | 8.42E-04 | 7.47E-02  | 6.19E-02 | 2.29E-01 |
| X-24761 | 5.18E-02  | 6.29E-02 | 4.11E-01 | 5.48E-02  | 6.09E-02 | 3.69E-01 | 7.52E-02  | 5.90E-02 | 2.04E-01 |
| X-24762 | -5.30E-02 | 5.95E-02 | 3.74E-01 | -4.25E-02 | 5.76E-02 | 4.62E-01 | -6.08E-02 | 5.59E-02 | 2.78E-01 |
| X-24947 | -1.69E-01 | 5.87E-02 | 4.40E-03 | -1.49E-01 | 5.70E-02 | 9.27E-03 | -1.26E-01 | 5.55E-02 | 2.41E-02 |
| X-24949 | -1.33E-01 | 6.44E-02 | 3.94E-02 | -1.35E-01 | 6.23E-02 | 3.06E-02 | -3.93E-02 | 6.10E-02 | 5.20E-01 |
| X-24951 | -1.16E-01 | 6.25E-02 | 6.41E-02 | -1.60E-01 | 6.01E-02 | 8.06E-03 | -1.13E-01 | 5.87E-02 | 5.62E-02 |
| X-24953 | -6.36E-02 | 6.03E-02 | 2.92E-01 | -8.61E-02 | 5.83E-02 | 1.40E-01 | -5.82E-02 | 5.67E-02 | 3.05E-01 |
| X-24970 | -7.97E-03 | 6.27E-02 | 8.99E-01 | -3.72E-02 | 6.07E-02 | 5.40E-01 | -4.32E-02 | 5.89E-02 | 4.65E-01 |
| X-24980 | 1.34E-02  | 6.35E-02 | 8.33E-01 | 9.05E-02  | 6.13E-02 | 1.41E-01 | -7.52E-02 | 5.96E-02 | 2.08E-01 |
| X-25009 | -6.22E-02 | 6.45E-02 | 3.35E-01 | 4.08E-02  | 6.24E-02 | 5.14E-01 | 1.54E-02  | 6.07E-02 | 7.99E-01 |
| X-25172 | 5.27E-03  | 6.54E-02 | 9.36E-01 | 1.51E-03  | 6.33E-02 | 9.81E-01 | -2.96E-02 | 6.14E-02 | 6.31E-01 |
| X-25217 | 3.55E-02  | 6.62E-02 | 5.92E-01 | 1.27E-02  | 6.41E-02 | 8.43E-01 | -7.29E-04 | 6.23E-02 | 9.91E-01 |
| X-25247 | 4.98E-02  | 6.46E-02 | 4.41E-01 | 1.34E-01  | 6.21E-02 | 3.15E-02 | 6.31E-02  | 6.07E-02 | 3.00E-01 |
| X-25271 | 1.59E-01  | 6.52E-02 | 1.51E-02 | 1.36E-01  | 6.33E-02 | 3.21E-02 | 5.45E-02  | 6.19E-02 | 3.79E-01 |
| X-25279 | 6.53E-02  | 5.71E-02 | 2.54E-01 | -4.48E-02 | 5.53E-02 | 4.19E-01 | 1.54E-02  | 5.38E-02 | 7.75E-01 |

Supplementary Table 4: Parameter estimates for metabolome-wide association studies for diet-metabolite associations for each of: HEI-15, DASH and AMED diet, controlling for BMI

|         |           |          |          |           |          |          |           |          |          |
|---------|-----------|----------|----------|-----------|----------|----------|-----------|----------|----------|
| X-25343 | -2.87E-02 | 6.44E-02 | 6.56E-01 | -5.72E-02 | 6.22E-02 | 3.59E-01 | -4.10E-02 | 6.05E-02 | 4.99E-01 |
| X-25371 | -1.94E-02 | 5.62E-02 | 7.30E-01 | 9.06E-02  | 5.42E-02 | 9.55E-02 | -1.12E-01 | 5.25E-02 | 3.43E-02 |
| X-25417 | 2.51E-02  | 6.73E-02 | 7.10E-01 | -1.48E-01 | 6.46E-02 | 2.25E-02 | 7.93E-02  | 6.31E-02 | 2.10E-01 |
| X-25419 | 6.92E-02  | 6.23E-02 | 2.67E-01 | -1.52E-01 | 5.97E-02 | 1.13E-02 | 1.75E-01  | 5.77E-02 | 2.66E-03 |
| X-25420 | -1.68E-02 | 6.21E-02 | 7.87E-01 | -2.01E-02 | 6.01E-02 | 7.39E-01 | -4.80E-02 | 5.83E-02 | 4.11E-01 |
| X-25422 | -1.35E-01 | 5.87E-02 | 2.20E-02 | -1.56E-01 | 5.66E-02 | 6.36E-03 | -7.63E-02 | 5.55E-02 | 1.71E-01 |
| X-25433 | -6.08E-02 | 6.45E-02 | 3.46E-01 | -5.97E-02 | 6.24E-02 | 3.40E-01 | -1.44E-01 | 6.01E-02 | 1.75E-02 |
| X-25450 | -2.67E-02 | 6.08E-02 | 6.62E-01 | 6.03E-02  | 5.88E-02 | 3.06E-01 | -2.03E-02 | 5.72E-02 | 7.24E-01 |
| X-25454 | 8.35E-02  | 6.30E-02 | 1.86E-01 | 9.42E-02  | 6.09E-02 | 1.23E-01 | -4.07E-02 | 5.94E-02 | 4.94E-01 |
| X-25457 | -4.69E-02 | 5.64E-02 | 4.06E-01 | 3.10E-02  | 5.46E-02 | 5.70E-01 | 2.66E-02  | 5.30E-02 | 6.17E-01 |
| X-25468 | 9.60E-03  | 6.42E-02 | 8.81E-01 | 1.17E-01  | 6.18E-02 | 5.99E-02 | -1.75E-02 | 6.04E-02 | 7.72E-01 |
| X-25519 | -1.35E-01 | 6.40E-02 | 3.53E-02 | -6.92E-03 | 6.24E-02 | 9.12E-01 | -4.65E-02 | 6.06E-02 | 4.44E-01 |
| X-25520 | 4.94E-02  | 6.30E-02 | 4.34E-01 | 4.42E-02  | 6.09E-02 | 4.69E-01 | 4.53E-02  | 5.92E-02 | 4.45E-01 |
| X-25524 | 1.69E-01  | 6.36E-02 | 8.42E-03 | 1.31E-01  | 6.18E-02 | 3.51E-02 | 1.09E-01  | 6.02E-02 | 7.21E-02 |
| X-25656 | 9.47E-02  | 6.49E-02 | 1.46E-01 | 1.69E-02  | 6.31E-02 | 7.89E-01 | 5.88E-02  | 6.12E-02 | 3.37E-01 |
| X-25790 | 4.42E-02  | 6.07E-02 | 4.67E-01 | 6.35E-02  | 5.87E-02 | 2.80E-01 | 3.86E-02  | 5.71E-02 | 4.99E-01 |
| X-25805 | -3.71E-02 | 6.43E-02 | 5.64E-01 | -3.55E-02 | 6.22E-02 | 5.69E-01 | -1.59E-03 | 6.04E-02 | 9.79E-01 |
| X-25810 | -7.12E-03 | 6.47E-02 | 9.12E-01 | -4.24E-02 | 6.25E-02 | 4.98E-01 | 1.05E-01  | 6.05E-02 | 8.39E-02 |
| X-25937 | -1.34E-01 | 5.89E-02 | 2.38E-02 | -7.38E-02 | 5.74E-02 | 2.00E-01 | -9.16E-02 | 5.56E-02 | 1.01E-01 |
| X-25957 | 1.16E-01  | 6.23E-02 | 6.42E-02 | 1.21E-01  | 6.02E-02 | 4.48E-02 | 1.32E-01  | 5.84E-02 | 2.48E-02 |
| X-25991 | 9.82E-02  | 6.19E-02 | 1.14E-01 | 1.35E-01  | 5.97E-02 | 2.48E-02 | 7.83E-02  | 5.83E-02 | 1.81E-01 |
| X-26054 | -5.64E-05 | 6.35E-02 | 9.99E-01 | 5.39E-02  | 6.14E-02 | 3.80E-01 | -4.86E-03 | 5.97E-02 | 9.35E-01 |
| X-26062 | 4.21E-02  | 6.27E-02 | 5.02E-01 | -3.25E-01 | 5.75E-02 | 3.98E-08 | 5.60E-02  | 5.89E-02 | 3.42E-01 |
| X-26106 | -8.18E-02 | 6.01E-02 | 1.75E-01 | -1.38E-02 | 5.83E-02 | 8.13E-01 | -8.06E-02 | 5.65E-02 | 1.54E-01 |
| X-26107 | -6.22E-02 | 6.05E-02 | 3.04E-01 | -2.92E-02 | 5.86E-02 | 6.19E-01 | -6.91E-02 | 5.68E-02 | 2.25E-01 |
| X-26108 | -9.15E-02 | 6.11E-02 | 1.36E-01 | -7.18E-02 | 5.92E-02 | 2.27E-01 | -8.92E-02 | 5.75E-02 | 1.22E-01 |
| X-26109 | -7.73E-02 | 5.61E-02 | 1.69E-01 | -4.58E-02 | 5.44E-02 | 4.01E-01 | -1.15E-01 | 5.25E-02 | 2.91E-02 |
| X-26111 | -1.60E-01 | 6.51E-02 | 1.45E-02 | -2.49E-01 | 6.20E-02 | 7.76E-05 | -1.13E-01 | 6.15E-02 | 6.77E-02 |
| X-26119 | -3.19E-02 | 6.46E-02 | 6.22E-01 | -4.40E-03 | 6.25E-02 | 9.44E-01 | -6.63E-02 | 6.06E-02 | 2.75E-01 |

Supplementary Table 5: Standardized parameter estimates for associations between diet-related metabolites and six measures of glucose and insulin homeostasis.

Supplementary Table 5: Standardized parameter estimates for associations between diet-related metabolites and six measures of glucose and insulin homeostasis.

| Metabolite                              | Diet         | Fasting Glucose |      |          | Fasting Insulin |      |          | C Peptide |      |          | Insulin Sensitivity |      |          | Insulin Secretion |      |          | Disposition Index |      |          |
|-----------------------------------------|--------------|-----------------|------|----------|-----------------|------|----------|-----------|------|----------|---------------------|------|----------|-------------------|------|----------|-------------------|------|----------|
|                                         |              | B               | SE   | P        | B               | SE   | P        | B         | SE   | P        | B                   | SE   | P        | B                 | SE   | P        | B                 | SE   | P        |
| 1-eicosenoyl-GPC (20:1)*                | HEI-15, AMEI | -0.32           | 0.06 | 2.77E-08 | -0.45           | 0.05 | 4.05E-18 | -0.51     | 0.05 | 2.54E-22 | 0.49                | 0.05 | 1.22E-22 | -0.26             | 0.05 | 4.48E-06 | 0.32              | 0.06 | 3.13E-08 |
| catechol sulfate                        | HEI-15, DASH | -0.28           | 0.06 | 5.98E-06 | -0.14           | 0.06 | 0.02     | -0.12     | 0.06 | 0.04     | 0.19                | 0.06 | 8.44E-04 | 0.07              | 0.06 | 0.23     | 0.32              | 0.06 | 1.54E-07 |
| 1-arachidoyl-GPC (20:0)                 | HEI-15, DASH | -0.27           | 0.05 | 1.93E-06 | -0.35           | 0.05 | 1.87E-11 | -0.42     | 0.05 | 1.39E-15 | 0.39                | 0.05 | 1.45E-14 | -0.19             | 0.05 | 7.02E-04 | 0.27              | 0.06 | 1.35E-06 |
| X-14056                                 | HEI-15       | 0.3             | 0.06 | 6.18E-07 | 0.37            | 0.05 | 2.85E-11 | 0.5       | 0.05 | 3.59E-19 | -0.39               | 0.05 | 7.87E-13 | 0.17              | 0.06 | 0.003    | -0.28             | 0.06 | 3.97E-06 |
| methyl glucopyranoside (α HEI-15        |              | -0.21           | 0.06 | 2.04E-04 | -0.2            | 0.05 | 2.66E-04 | -0.16     | 0.06 | 0.01     | 0.22                | 0.05 | 6.02E-05 | -0.01             | 0.06 | 0.89     | 0.26              | 0.06 | 8.39E-06 |
| 10-heptadecenoate (17:1r HEI-15, DASH   |              | 0.15            | 0.06 | 0.02     | 0.04            | 0.06 | 0.51     | 0.1       | 0.06 | 0.11     | -0.12               | 0.06 | 0.04     | -0.11             | 0.06 | 0.06     | -0.28             | 0.06 | 1.01E-05 |
| 1-erucoyl-GPC (22:1)*                   | HEI-15, AMEI | -0.27           | 0.06 | 1.35E-06 | -0.41           | 0.05 | 2.57E-15 | -0.46     | 0.05 | 2.84E-18 | 0.43                | 0.05 | 1.15E-16 | -0.24             | 0.05 | 1.83E-05 | 0.25              | 0.06 | 1.09E-05 |
| cystine                                 | HEI-15       | 0.24            | 0.06 | 3.70E-05 | 0.17            | 0.05 | 0.002    | 0.33      | 0.05 | 1.27E-09 | -0.2                | 0.05 | 1.44E-04 | -0.02             | 0.06 | 0.78     | -0.25             | 0.06 | 1.32E-05 |
| N-stearoyl-sphinganine (d DASH          |              | 0.24            | 0.06 | 2.35E-05 | 0.26            | 0.05 | 1.30E-06 | 0.34      | 0.05 | 6.2E-10  | -0.3                | 0.05 | 7.52E-09 | 0.11              | 0.06 | 0.05     | -0.25             | 0.06 | 1.59E-05 |
| guaiacol sulfate                        | HEI-15       | -0.24           | 0.06 | 5.78E-05 | -0.04           | 0.06 | 0.49     | 0.03      | 0.06 | 0.58     | 0.08                | 0.06 | 0.15     | 0.14              | 0.06 | 0.02     | 0.25              | 0.06 | 1.84E-05 |
| adrenate (22:4n6)                       | HEI-15       | 0.11            | 0.06 | 0.05     | 0.07            | 0.05 | 0.18     | 0.09      | 0.06 | 0.1      | -0.15               | 0.05 | 0.005    | -0.05             | 0.06 | 0.39     | -0.23             | 0.06 | 4.45E-05 |
| (14 or 15)-methylpalmitat AMED          |              | 0.15            | 0.06 | 0.01     | 0.06            | 0.06 | 0.32     | 0.11      | 0.06 | 0.05     | -0.1                | 0.06 | 0.07     | -0.08             | 0.06 | 0.15     | -0.21             | 0.06 | 3.62E-04 |
| pentose acid*                           | HEI-15       | -0.15           | 0.07 | 0.03     | -0.12           | 0.06 | 0.05     | -0.02     | 0.06 | 0.72     | 0.16                | 0.06 | 0.01     | 0.02              | 0.06 | 0.76     | 0.23              | 0.06 | 4.00E-04 |
| 1-lignoceroyl-GPC (24:0)                | HEI-15, DASH | -0.18           | 0.06 | 0.001    | -0.29           | 0.05 | 2.72E-08 | -0.34     | 0.05 | 1.25E-10 | 0.33                | 0.05 | 7.06E-11 | -0.19             | 0.05 | 5.33E-04 | 0.2               | 0.06 | 4.18E-04 |
| tartronate (hydroxymalon HEI-15, DASH   |              | -0.2            | 0.06 | 0.002    | -0.22           | 0.06 | 2.79E-04 | -0.27     | 0.06 | 1.31E-05 | 0.24                | 0.06 | 6.74E-05 | -0.05             | 0.06 | 0.45     | 0.23              | 0.06 | 4.41E-04 |
| sphingomyelin (d18:0/18: DASH           |              | 0.17            | 0.06 | 0.003    | 0.2             | 0.05 | 2.32E-04 | 0.23      | 0.05 | 3.96E-05 | -0.24               | 0.05 | 8.69E-06 | 0.09              | 0.06 | 0.11     | -0.2              | 0.06 | 6.28E-04 |
| X-12726                                 | HEI-15, DASH | -0.14           | 0.06 | 0.02     | -0.16           | 0.05 | 0.003    | -0.17     | 0.06 | 0.004    | 0.22                | 0.05 | 6.56E-05 | -0.06             | 0.06 | 0.31     | 0.2               | 0.06 | 6.29E-04 |
| X-21339                                 | HEI-15       | 0.16            | 0.06 | 0.01     | 0.18            | 0.05 | 8.13E-04 | 0.18      | 0.06 | 0.001    | -0.2                | 0.05 | 1.84E-04 | 0.05              | 0.06 | 0.32     | -0.19             | 0.06 | 0.001    |
| 1-behenoyl-GPC (22:0)                   | HEI-15, DASH | -0.18           | 0.06 | 0.001    | -0.27           | 0.05 | 2.82E-07 | -0.34     | 0.05 | 3.8E-10  | 0.31                | 0.05 | 3.05E-09 | -0.18             | 0.05 | 0.001    | 0.19              | 0.06 | 0.001    |
| beta-sitosterol                         | AMED         | -0.15           | 0.06 | 0.01     | -0.22           | 0.05 | 5.57E-05 | -0.25     | 0.05 | 4.76E-06 | 0.24                | 0.05 | 1.02E-05 | -0.09             | 0.06 | 0.1      | 0.19              | 0.06 | 0.001    |
| 4-acetylphenol sulfate                  | DASH         | -0.09           | 0.06 | 0.12     | -0.05           | 0.06 | 0.37     | -0.06     | 0.06 | 0.33     | 0.1                 | 0.06 | 0.08     | 0.05              | 0.06 | 0.38     | 0.19              | 0.06 | 0.002    |
| branched chain 14:0 dicar HEI-15, DASH  |              | -0.15           | 0.06 | 0.01     | -0.2            | 0.06 | 2.72E-04 | -0.19     | 0.06 | 0.001    | 0.23                | 0.05 | 4.58E-05 | -0.08             | 0.06 | 0.19     | 0.18              | 0.06 | 0.002    |
| tartarate                               | HEI-15       | -0.03           | 0.06 | 0.59     | -0.14           | 0.06 | 0.03     | -0.03     | 0.06 | 0.64     | 0.15                | 0.06 | 0.01     | 0.01              | 0.06 | 0.87     | 0.19              | 0.06 | 0.003    |
| oxalate (ethanedioate)                  | HEI-15, DASH | -0.13           | 0.06 | 0.03     | -0.17           | 0.06 | 0.002    | -0.2      | 0.06 | 6.67E-04 | 0.18                | 0.06 | 0.001    | -0.03             | 0.06 | 0.62     | 0.18              | 0.06 | 0.003    |
| glycerate                               | HEI-15, DASH | -0.19           | 0.06 | 0.003    | -0.2            | 0.06 | 5.41E-04 | -0.26     | 0.06 | 1.55E-05 | 0.22                | 0.06 | 1.42E-04 | -0.07             | 0.06 | 0.29     | 0.19              | 0.06 | 0.003    |
| glycine conjugate of C10H HEI-15        |              | 0.15            | 0.05 | 0.01     | 0.19            | 0.05 | 3.18E-04 | 0.25      | 0.05 | 3.04E-06 | -0.2                | 0.05 | 1.26E-04 | 0.07              | 0.05 | 0.2      | -0.16             | 0.06 | 0.003    |
| X-12306                                 | HEI-15, AMEI | -0.14           | 0.06 | 0.02     | -0.09           | 0.06 | 0.13     | -0.14     | 0.06 | 0.01     | 0.16                | 0.06 | 0.005    | -0.01             | 0.06 | 0.9      | 0.18              | 0.06 | 0.004    |
| 1-nervonoyl-GPC (24:1n9)* HEI-15, AMEI  |              | -0.18           | 0.06 | 0.002    | -0.31           | 0.05 | 2.03E-08 | -0.39     | 0.05 | 3.76E-12 | 0.32                | 0.05 | 2.35E-09 | -0.2              | 0.06 | 4.86E-04 | 0.17              | 0.06 | 0.004    |
| tridecenedioate (C13:1-DC AMED          |              | 0.12            | 0.06 | 0.06     | -0.04           | 0.06 | 0.54     | 0.02      | 0.06 | 0.74     | 0.01                | 0.06 | 0.84     | -0.15             | 0.06 | 0.01     | -0.15             | 0.06 | 0.01     |
| X-21736                                 | HEI-15, DASH | 0.06            | 0.06 | 0.3      | 0.04            | 0.06 | 0.45     | 0.12      | 0.06 | 0.04     | -0.05               | 0.06 | 0.39     | -0.09             | 0.06 | 0.12     | -0.15             | 0.06 | 0.01     |
| X-21842                                 | HEI-15, DASH | -0.1            | 0.06 | 0.11     | -0.07           | 0.06 | 0.23     | -0.02     | 0.06 | 0.76     | 0.08                | 0.06 | 0.15     | 0.05              | 0.06 | 0.36     | 0.16              | 0.06 | 0.01     |
| 2,6-dihydroxybenzoic acid DASH          |              | -0.17           | 0.06 | 0.01     | -0.06           | 0.06 | 0.3      | -0.04     | 0.06 | 0.45     | 0.08                | 0.06 | 0.14     | 0.05              | 0.06 | 0.42     | 0.17              | 0.06 | 0.01     |
| indolepropionate                        | HEI-15, DASH | -0.15           | 0.06 | 0.01     | -0.15           | 0.06 | 0.01     | -0.2      | 0.06 | 8.51E-04 | 0.17                | 0.06 | 0.002    | -0.04             | 0.06 | 0.45     | 0.16              | 0.06 | 0.01     |
| S-methylmethionine                      | AMED         | -0.12           | 0.06 | 0.03     | -0.16           | 0.05 | 0.004    | -0.18     | 0.06 | 0.002    | 0.16                | 0.05 | 0.003    | -0.04             | 0.06 | 0.54     | 0.14              | 0.06 | 0.01     |
| androstenediol (3β,17β DASH             |              | 0.17            | 0.07 | 0.01     | 0.11            | 0.06 | 0.09     | 0.13      | 0.06 | 0.05     | -0.1                | 0.06 | 0.1      | -0.03             | 0.06 | 0.68     | -0.16             | 0.07 | 0.01     |
| 1-palmitoyl-2-arachidonoyl DASH         |              | 0.18            | 0.06 | 0.002    | 0.07            | 0.05 | 0.18     | 0.15      | 0.06 | 0.01     | -0.13               | 0.05 | 0.01     | 0                 | 0.06 | 1        | -0.16             | 0.06 | 0.01     |
| X-21752                                 | HEI-15, DASH | -0.09           | 0.06 | 0.14     | -0.14           | 0.06 | 0.01     | -0.13     | 0.06 | 0.03     | 0.15                | 0.06 | 0.01     | -0.04             | 0.06 | 0.45     | 0.14              | 0.06 | 0.02     |
| 1-stearoyl-2-docosapentat AMED          |              | 0.12            | 0.06 | 0.05     | 0.13            | 0.06 | 0.02     | 0.18      | 0.06 | 0.002    | -0.15               | 0.06 | 0.01     | 0.04              | 0.06 | 0.48     | -0.14             | 0.06 | 0.02     |
| 3,5-dichloro-2,6-dihydroxy HEI-15, AMEI |              | 0.09            | 0.06 | 0.12     | 0.17            | 0.05 | 0.001    | 0.18      | 0.05 | 0.001    | -0.17               | 0.05 | 0.001    | 0.07              | 0.05 | 0.18     | -0.12             | 0.06 | 0.03     |
| N-delta-acetylornithine                 | HEI-15, AMEI | -0.13           | 0.06 | 0.03     | -0.04           | 0.06 | 0.55     | -0.02     | 0.06 | 0.79     | 0.08                | 0.06 | 0.17     | 0.03              | 0.06 | 0.61     | 0.13              | 0.06 | 0.04     |
| X-11315                                 | HEI-15, DASH | -0.05           | 0.06 | 0.44     | -0.1            | 0.06 | 0.1      | -0.09     | 0.06 | 0.12     | 0.09                | 0.06 | 0.11     | 0.01              | 0.06 | 0.88     | 0.13              | 0.06 | 0.04     |
| X-26062                                 | DASH         | -0.08           | 0.06 | 0.2      | -0.16           | 0.06 | 0.01     | -0.15     | 0.06 | 0.01     | 0.17                | 0.06 | 0.002    | -0.08             | 0.06 | 0.16     | 0.12              | 0.06 | 0.05     |
| heptenedioate (C7:1-DC)* HEI-15, AMEI   |              | 0.08            | 0.06 | 0.16     | 0.07            | 0.06 | 0.24     | 0.14      | 0.06 | 0.02     | -0.07               | 0.06 | 0.21     | -0.02             | 0.06 | 0.73     | -0.11             | 0.06 | 0.06     |
| ethyl alpha-glucopyranosid DASH         |              | -0.04           | 0.06 | 0.52     | -0.2            | 0.06 | 2.73E-04 | -0.2      | 0.06 | 6.65E-04 | 0.2                 | 0.05 | 4.39E-04 | -0.12             | 0.06 | 0.04     | 0.11              | 0.06 | 0.07     |
| 3-bromo-5-chloro-2,6-dihy AMED          |              | 0.07            | 0.06 | 0.24     | 0.11            | 0.05 | 0.04     | 0.1       | 0.05 | 0.07     | -0.1                | 0.05 | 0.05     | 0.04              | 0.05 | 0.51     | -0.09             | 0.06 | 0.13     |
| X-17351                                 | HEI-15, DASH | -0.14           | 0.06 | 0.02     | -0.04           | 0.06 | 0.53     | -0.02     | 0.06 | 0.72     | 0.06                | 0.06 | 0.29     | 0.02              | 0.06 | 0.78     | 0.09              | 0.06 | 0.14     |
| 4-methoxyphenol sulfate                 | DASH         | 0.02            | 0.06 | 0.74     | -0.05           | 0.06 | 0.38     | -0.06     | 0.06 | 0.32     | 0.08                | 0.06 | 0.17     | -0.02             | 0.06 | 0.72     | 0.09              | 0.06 | 0.15     |
| carotene diol (2)                       | HEI-15, AMEI | 0.06            | 0.06 | 0.37     | -0.2            | 0.06 | 6.79E-04 | -0.06     | 0.06 | 0.32     | 0.15                | 0.06 | 0.01     | -0.09             | 0.06 | 0.14     | 0.09              | 0.06 | 0.17     |
| 1-(1-enyl-oleoyl)-2-docosa AMED         |              | -0.09           | 0.06 | 0.17     | -0.19           | 0.06 | 0.002    | -0.17     | 0.06 | 0.01     | 0.18                | 0.06 | 0.002    | -0.12             | 0.06 | 0.06     | 0.08              | 0.07 | 0.21     |
| beta-cryptoxanthin                      | HEI-15, DASH | -0.01           | 0.06 | 0.85     | -0.18           | 0.06 | 0.001    | -0.05     | 0.06 | 0.41     | 0.15                | 0.06 | 0.01     | -0.1              | 0.06 | 0.1      | 0.07              | 0.06 | 0.23     |
| pyridoxate                              | DASH         | -0.1            | 0.06 | 0.1      | -0.02           | 0.06 | 0.75     | 0.03      | 0.06 | 0.66     | 0.06                | 0.06 | 0.26     | -0.02             | 0.06 | 0.78     | 0.06              | 0.06 | 0.36     |
| N-methylproline                         | DASH         | 0               | 0.06 | 0.95     | 0.02            | 0.05 | 0.76     | 0.06      | 0.05 | 0.25     | -0.03               | 0.05 | 0.59     | 0.05              | 0.05 | 0.37     | 0.02              | 0.06 | 0.78     |
| carotene diol (1)                       | HEI-15, AMEI | 0.1             | 0.06 | 0.1      | -0.14           | 0.06 | 0.02     | 0.02      | 0.06 | 0.75     | 0.09                | 0.06 | 0.13     | -0.09             | 0.06 | 0.14     | 0.01              | 0.06 | 0.84     |
| 1-(1                                    |              |                 |      |          |                 |      |          |           |      |          |                     |      |          |                   |      |          |                   |      |          |

Abbreviations : AMED: Mediterranean-style diet; DASH: Dietary Approaches to Stop Hypertension; HEI-15: Healthy Eating Index-2015

Note : All models controlled for age, sex, race, physical activity, education level, energy intake (kilocalories per day; kcal/day) and smoking status

Note : Significant associations (P<3.0\*10<sup>-4</sup> after a Bonferroni correction) in bold

Supplementary Table 6: Pearson Correlations Between Diet Score, and Diet-Specific Metabolite Summary Scores

**Supplementary Table 6:** Pearson Correlations Between Diet Score, and Diet-Specific Metabolite Summary Scores

|                                  | Dietary Intake |                        |                        | Metabolite Summary Scores |                        |                        |
|----------------------------------|----------------|------------------------|------------------------|---------------------------|------------------------|------------------------|
|                                  | HEI            | DASH                   | AMED                   | HEI                       | DASH                   | AMED                   |
| <i>Dietary Intake</i>            |                |                        |                        |                           |                        |                        |
| HEI                              | -              | <2.0*10 <sup>-16</sup> | <2.0*10 <sup>-16</sup> | <2.0*10 <sup>-16</sup>    | <2.0*10 <sup>-16</sup> | <2.0*10 <sup>-16</sup> |
| DASH                             | 0.62           | -                      | <2.0*10 <sup>-16</sup> | <2.0*10 <sup>-16</sup>    | <2.0*10 <sup>-16</sup> | <2.0*10 <sup>-16</sup> |
| AMED                             | 0.61           | 0.51                   | -                      | <2.0*10 <sup>-16</sup>    | <2.0*10 <sup>-16</sup> | <2.0*10 <sup>-16</sup> |
| <i>Metabolite Summary Scores</i> |                |                        |                        |                           |                        |                        |
| HEI                              | 0.63           | 0.5                    | 0.45                   | -                         | <2.0*10 <sup>-16</sup> | <2.0*10 <sup>-16</sup> |
| DASH                             | 0.59           | 0.57                   | 0.43                   | 0.93                      | -                      | <2.0*10 <sup>-16</sup> |
| AMED                             | 0.58           | 0.38                   | 0.48                   | 0.9                       | 0.8                    | -                      |

*Note :* Pearson correlations below the diagonal, P-values above the diagonal.

*Abbreviations :* AMED: Mediterranean style diet; DASH: Dietary Approaches to Stop Hypertension  
HEI: Healthy Eating Index;

Supplementary Table 7: Standardized parameter estimates for associations between six glucose and insulin homeostasis traits with scores representing adherence to each of three healthy diet patterns: the Healthy Eating Index (HEI), the Dietary Approaches to Stop Hypertension (DASH), and a Mediterranean-Style Diet (AMED), and with Metabolite Summary Scores (MSSs) for the same dietary patterns, when additionally controlling for BMI

**Supplementary Table 7:** Standardized parameter estimates for associations between six glucose and insulin homeostasis traits with scores representing adherence to each of three healthy diet patterns: the Healthy Eating Index (HEI), the Dietary Approaches to Stop Hypertension (DASH), and a Mediterranean-Style Diet (AMED), and with Metabolite Summary Scores (MSSs) for the same dietary patterns, when additionally controlling for BMI

|                            | HEI          |             |                 | DASH         |              |                 | AMED         |             |                 |
|----------------------------|--------------|-------------|-----------------|--------------|--------------|-----------------|--------------|-------------|-----------------|
|                            | $\beta$      | SE          | P               | $\beta$      | SE           | P               | $\beta$      | SE          | P               |
| <i>Fasting glucose</i>     |              |             |                 |              |              |                 |              |             |                 |
| Diet score                 | <b>-0.15</b> | <b>0.06</b> | <b>0.01</b>     | -0.17        | 0.06         | 0.005           | -0.12        | 0.06        | 0.03            |
| MSS                        | <b>-0.25</b> | <b>0.06</b> | <b>1.00E-04</b> | <b>-0.24</b> | <b>-0.06</b> | <b>1.00E-04</b> | <b>-0.17</b> | <b>0.06</b> | <b>0.01</b>     |
| <i>Fasting insulin</i>     |              |             |                 |              |              |                 |              |             |                 |
| Diet score                 | -0.08        | 0.05        | 0.11            | -0.03        | 0.05         | 0.52            | -0.02        | 0.05        | 0.97            |
| MSS                        | <b>-0.16</b> | <b>0.05</b> | <b>3.00E-03</b> | -0.1         | 0.05         | 0.05            | <b>-0.15</b> | <b>0.05</b> | <b>0.005</b>    |
| <i>C-peptide</i>           |              |             |                 |              |              |                 |              |             |                 |
| Diet score                 | -0.08        | 0.05        | 0.09            | -0.05        | 0.05         | 0.28            | -0.04        | 0.05        | 0.38            |
| MSS                        | <b>-0.17</b> | <b>0.05</b> | <b>0.001</b>    | <b>-0.13</b> | <b>0.05</b>  | <b>0.01</b>     | <b>-0.16</b> | <b>0.05</b> | <b>0.003</b>    |
| <i>Insulin secretion</i>   |              |             |                 |              |              |                 |              |             |                 |
| Diet score                 | -0.003       | 0.06        | 0.96            | 0.02         | 0.06         | 0.78            | 0.06         | 0.05        | 0.29            |
| MSS                        | 0.03         | 0.06        | 0.66            | 0.06         | 0.06         | 0.34            | -0.02        | 0.06        | 0.74            |
| <i>Insulin sensitivity</i> |              |             |                 |              |              |                 |              |             |                 |
| Diet score                 | 0.11         | 0.05        | 0.03            | 0.09         | 0.05         | 0.08            | 0.03         | 0.05        | 0.51            |
| MSS                        | <b>0.24</b>  | <b>0.05</b> | <b>8.60E-06</b> | <b>0.18</b>  | <b>0.05</b>  | <b>4.50E-04</b> | <b>0.2</b>   | <b>0.05</b> | <b>1.10E-04</b> |
| <i>Disposition Index</i>   |              |             |                 |              |              |                 |              |             |                 |
| Diet score                 | 0.15         | 0.06        | 0.02            | 0.12         | 0.06         | 0.04            | 0.1          | 0.06        | 0.08            |
| MSS                        | 0.33         | 0.06        | 4.10E-07        | 0.29         | 0.06         | 2.40E-06        | 0.23         | 0.06        | 3.30E-04        |

Abbreviations : AMED: Mediterranean Style diet, DASH: Dietary Approaches to Stop Hypertension; HEI: Healthy Eating Index (2015 version); MSS: Metabolite summary score

Note: All models controlled for age, sex, race, physical activity, education level, energy intake (kilocalories per day; kcal/day), smoking status and BMI

Note: Significant associations ( $P < .01$  after a Bonferroni correction for the effective number of independent tests) in bold.

\*Note: Partial r-squared representing the variance in outcome explained by the predictor, when controlling for age, sex, race, physical activity, education level, energy intake (kilocalories per day; kcal/day) and smoking status

Supplementary Figure 1

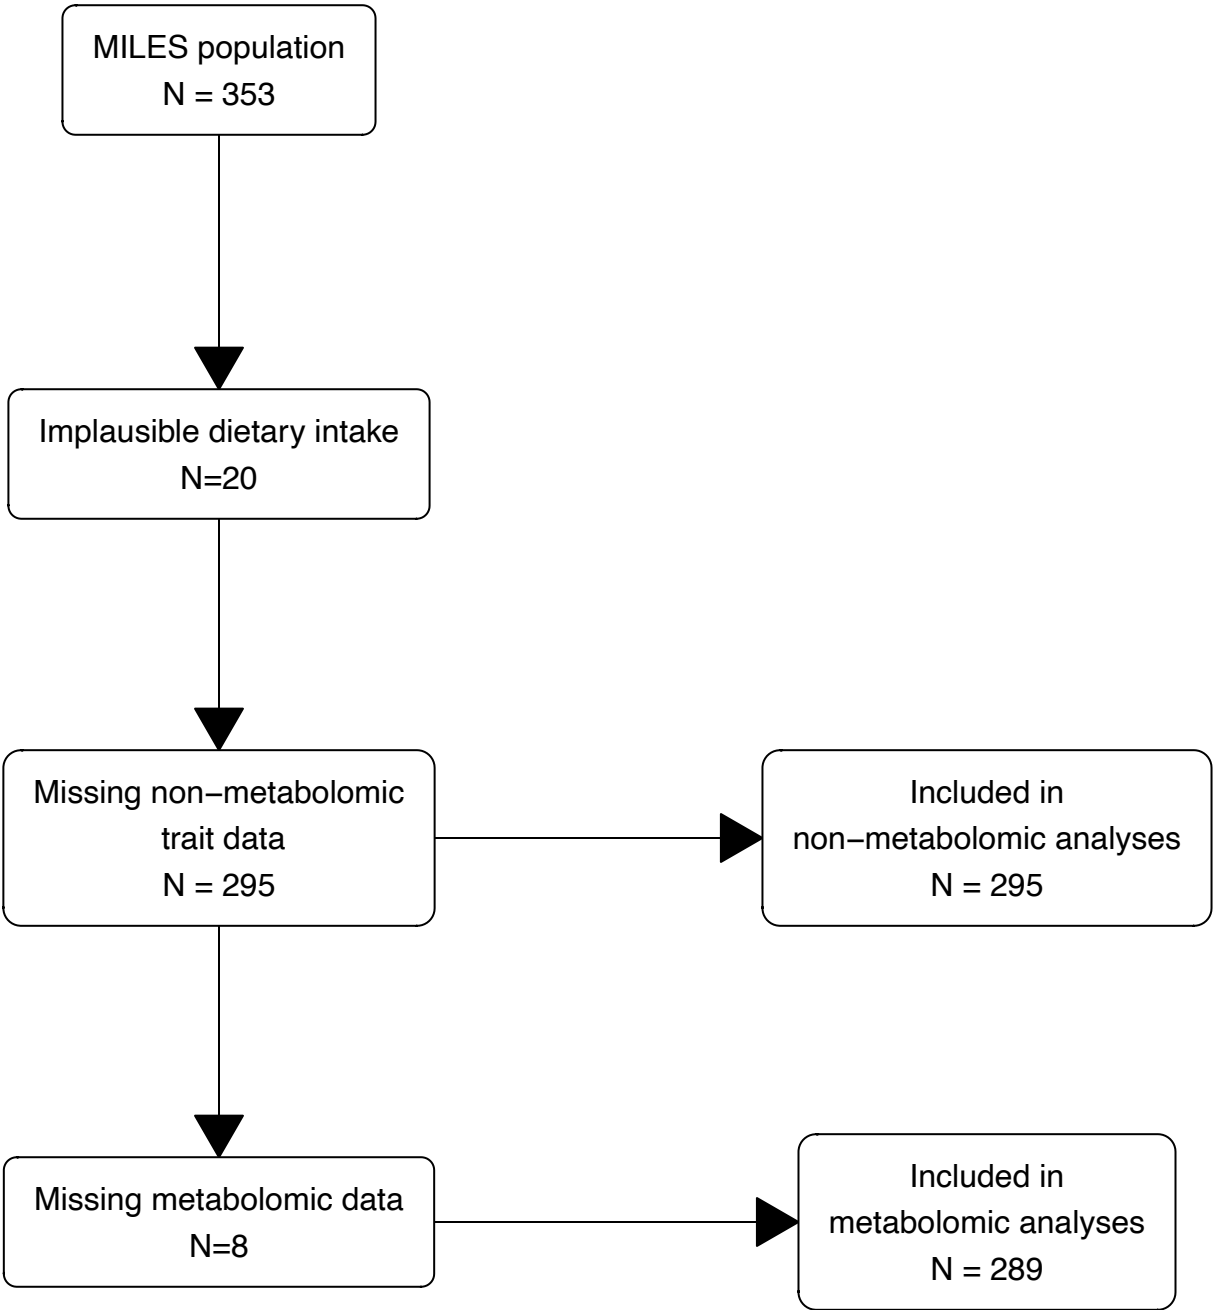

|     | 1-lignoceryl-GPC (24:0) | 1-arachidoyl-GPC (20:0) | 1-behenoyl-GPC (22:0) | 1-nervonoyl-GPC (24:1n9)* | 1-erucyl-GPC (22:1)* | 1-eicosenoyl-GPC (20:1)* | beta-sitosterol | 1-(1-enyl-oleyl)-2-docosahexenoyl-GPE (P-18:1/22:6)* | 1-(1-enyl-oleyl)-2-docosahexenoyl-GPC (P-18:1/22:6)* | beta-cryptoxanthin | carotene diol (1) | carotene diol (2) | X-21752 | tartarate | oxalate (ethanedioate) | tartronate (hydroxymalonate) | glycerate | pyridoxate | N-delta-acetylornithine | X-11315 | 4-acetylphenol sulfate | X-12726 | catechol sulfate | guaiacol sulfate | X-12680 | 4-methoxyphenol sulfate | 2,6-dihydroxybenzoic acid | N-methylproline | S-methylmethionine | X-12306 | X-21842 | indolepropionate | X-17351 | pentose acid* | methyl glucopyranoside (alpha + beta) | branched chain 14:0 dicarboxylic acid** | androstenediol (3beta,17beta) disulfate (1) | ethyl alpha-glucopyranoside | X-26062 | X-21736 | sphingomyelin (d18:0/18:0, d19:0/17:0)* | N-stearoyl-sphinganine (d18:0/18:0)* | tridecenedioate (C13:1-DC)* | heptenedioate (C7:1-DC)* | adrenate (22:4n6) | 10-heptadecenoate (17:1n7) | (14 or 15)-methylpalmitate (a17:0 or i17:0) | 1-palmitoyl-2-arachidonoyl-GPC (16:0/20:4n6) | 1-stearoyl-2-docosapentaenoyl-GPC (18:0/22:5n6)* | X-21339 | 3,5-dichloro-2,6-dihydroxybenzoic acid | 3-bromo-5-chloro-2,6-dihydroxybenzoic acid* | glycine conjugate of C10H14O2 (1)* | cystine | X-14056 |      |      |
|-----|-------------------------|-------------------------|-----------------------|---------------------------|----------------------|--------------------------|-----------------|------------------------------------------------------|------------------------------------------------------|--------------------|-------------------|-------------------|---------|-----------|------------------------|------------------------------|-----------|------------|-------------------------|---------|------------------------|---------|------------------|------------------|---------|-------------------------|---------------------------|-----------------|--------------------|---------|---------|------------------|---------|---------------|---------------------------------------|-----------------------------------------|---------------------------------------------|-----------------------------|---------|---------|-----------------------------------------|--------------------------------------|-----------------------------|--------------------------|-------------------|----------------------------|---------------------------------------------|----------------------------------------------|--------------------------------------------------|---------|----------------------------------------|---------------------------------------------|------------------------------------|---------|---------|------|------|
| 1   | 0.7                     | 0.8                     | 0.6                   | 0.5                       | 0.6                  | 0.3                      | 0.2             | 0.3                                                  | 0.2                                                  | 0.3                | 0.2               | 0.2               | 0.2     | 0.2       | 0.3                    | 0.4                          | 0.3       | 0.2        | 0.3                     | 0.3     | 0.3                    | 0.3     | 0.3              | 0.3              | 0.1     | 0.2                     | 0.2                       | 0.1             | 0.3                | 0.3     | 0.2     | 0.2              | 0.3     | 0.3           | 0.3                                   | -0.3                                    | 0.1                                         | 0.1                         | -0.1    | -0.3    | -0.3                                    | -0.1                                 | -0.1                        | -0.1                     | -0.1              | -0.1                       | -0.1                                        | -0.1                                         | -0.1                                             | -0.3    | -0.5                                   | -0.4                                        | -0.3                               | -0.3    | -0.3    | -0.4 |      |
| 0.7 | 1                       | 0.9                     | 0.5                   | 0.6                       | 0.9                  | 0.4                      | 0.2             | 0.3                                                  | 0.2                                                  | 0.3                | 0.2               | 0.2               | 0.2     | 0.2       | 0.3                    | 0.4                          | 0.4       | 0.2        | 0.3                     | 0.3     | 0.3                    | 0.3     | 0.4              | 0.3              | 0.2     | 0.2                     | 0.3                       | 0.2             | 0.1                | 0.3     | 0.3     | 0.3              | 0.3     | 0.3           | 0.3                                   | -0.2                                    | 0                                           | 0.1                         | -0.2    | -0.3    | -0.5                                    | -0.2                                 | -0.2                        | -0.3                     | -0.2              | -0.2                       | -0.2                                        | -0.2                                         | -0.4                                             | -0.3    | -0.3                                   | -0.2                                        | -0.4                               | -0.4    |         |      |      |
| 0.8 | 0.9                     | 1                       | 0.5                   | 0.5                       | 0.7                  | 0.4                      | 0.3             | 0.3                                                  | 0.3                                                  | 0.4                | 0.3               | 0.2               | 0.2     | 0.2       | 0.3                    | 0.4                          | 0.4       | 0.2        | 0.4                     | 0.3     | 0.3                    | 0.3     | 0.4              | 0.3              | 0.2     | 0.3                     | 0.2                       | 0.1             | 0.3                | 0.3     | 0.3     | 0.3              | 0.2     | 0.2           | 0.3                                   | 0.2                                     | 0                                           | 0                           | -0.1    | -0.3    | -0.4                                    | -0.1                                 | -0.2                        | -0.2                     | -0.1              | -0.1                       | -0.1                                        | -0.1                                         | -0.2                                             | -0.4    | -0.3                                   | -0.3                                        | -0.2                               | -0.3    | -0.4    |      |      |
| 0.6 | 0.5                     | 0.5                     | 1                     | 0.6                       | 0.6                  | 0.1                      | 0.2             | 0.3                                                  | 0.2                                                  | 0.2                | 0.2               | 0.1               | 0.2     | 0.2       | 0.3                    | 0.4                          | 0.3       | 0.2        | 0.3                     | 0.3     | 0.1                    | 0.2     | 0.3              | 0.2              | 0       | 0.2                     | 0.2                       | 0               | 0.2                | 0.3     | 0.2     | 0.2              | 0.1     | 0.3           | 0.3                                   | 0.2                                     | 0.2                                         | 0.2                         | 0.2     | -0.2    | 0.2                                     | 0                                    | -0.1                        | -0.1                     | -0.2              | -0.1                       | 0                                           | 0.1                                          | 0.1                                              | -0.1    | -0.3                                   | -0.4                                        | -0.4                               | -0.2    | -0.3    | -0.3 | -0.3 |
| 0.5 | 0.6                     | 0.5                     | 0.6                   | 1                         | 0.7                  | 0.2                      | 0.2             | 0.3                                                  | 0.1                                                  | 0.2                | 0.3               | 0.2               | 0.2     | 0.2       | 0.3                    | 0.4                          | 0.4       | 0.3        | 0.2                     | 0.3     | 0.2                    | 0.3     | 0.3              | 0.3              | 0.1     | 0.2                     | 0.2                       | 0.1             | 0.3                | 0.3     | 0.2     | 0.3              | 0.2     | 0.3           | 0.2                                   | 0.3                                     | 0.3                                         | 0.3                         | -0.2    | 0.1     | 0.2                                     | 0                                    | 0                           | -0.1                     | 0                 | -0.1                       | 0                                           | -0.1                                         | 0                                                | -0.1    | -0.3                                   | -0.4                                        | -0.3                               | -0.2    | -0.3    | -0.4 | -0.4 |
| 0.6 | 0.9                     | 0.7                     | 0.6                   | 0.7                       | 1                    | 0.3                      | 0.1             | 0.2                                                  | 0.2                                                  | 0.2                | 0.2               | 0.2               | 0.2     | 0.2       | 0.3                    | 0.4                          | 0.4       | 0.2        | 0.3                     | 0.3     | 0.3                    | 0.3     | 0.4              | 0.2              | 0.2     | 0.2                     | 0.2                       | 0.1             | 0.3                | 0.3     | 0.2     | 0.3              | 0.2     | 0.3           | 0.3                                   | 0.3                                     | 0.3                                         | -0.2                        | 0       | 0.1     | -0.1                                    | -0.2                                 | -0.4                        | -0.1                     | -0.1              | -0.2                       | -0.1                                        | -0.1                                         | -0.1                                             | -0.1    | -0.3                                   | -0.3                                        | -0.3                               | -0.2    | -0.3    | -0.4 | -0.4 |
| 0.3 | 0.4                     | 0.4                     | 0.1                   | 0.2                       | 0.3                  | 1                        | 0.3             | 0.3                                                  | 0.3                                                  | 0.3                | 0.3               | 0.1               | 0.1     | 0.2       | 0.2                    | 0.2                          | 0.2       | 0          | 0.2                     | 0.3     | 0.2                    | 0.2     | 0.3              | 0.2              | 0.1     | 0.1                     | 0.1                       | 0.2             | 0.2                | 0.2     | 0.2     | 0.2              | 0.2     | 0.2           | 0.2                                   | 0.2                                     | 0.3                                         | -0.2                        | 0       | 0       | -0.1                                    | -0.2                                 | -0.3                        | -0.2                     | -0.2              | -0.2                       | -0.1                                        | -0.3                                         | 0                                                | -0.1    | -0.2                                   | -0.1                                        | -0.2                               | -0.3    |         |      |      |
| 0.2 | 0.2                     | 0.3                     | 0.2                   | 0.2                       | 0.1                  | 0                        |                 |                                                      |                                                      |                    |                   |                   |         |           |                        |                              |           |            |                         |         |                        |         |                  |                  |         |                         |                           |                 |                    |         |         |                  |         |               |                                       |                                         |                                             |                             |         |         |                                         |                                      |                             |                          |                   |                            |                                             |                                              |                                                  |         |                                        |                                             |                                    |         |         |      |      |
